# Supplementary material
Source: publisher figshare collection journal article supplement (https://gsajournals.figshare.com/ndownloader/files/26681621)
Supplement: Supplementary file 1 [file 26681621]

>scaffold17|size806158
CGATATTAGCATAGCCGGTAAGGATGACATTGGAATTATTGCGAACGTTGACGATATTAC
TGAAAAAGAAAGTGCTGCTGCTAACGATAATGATGAGAATGGAAAGAATGAAGCAGGAGC
TAGGAGTGATTTTGATTTTGCAGATGGTTTGTTATCTCAAGAAGGTGCCCACGATCAAAT
TATATCTTCTATTGACACCAAGTTACTTCTAAAAAAGCCATCCTCCTCAAGCGAAGTTGT
TTTAATACAACATGAAGTAGCTGCATCATCAGCGTTGATCGAAACCAAAGAATCAGAGAA
AGAGCTAGCCCCCCCATTTAAACTTTCAATCTTTGTTGACGAACTCAATGCTTTTGAGAA
AACATTAATACAGGATTTACCGCTGTATAATGGTATTAATGAAGAACGGCCAAAAAAAGA
TGATTCTTTACCATTTATTCCAATTTCCAAATCAGTAGTGTCACTGGATGATAATGGATT
TTATAAGTTACTTGAGCGTCAATTGATTGACGAAGAACCATCAATATCACAATTGAGCAA
AAGGCGGGGTATGTTCTATGGTAATAGAAGAAATCATTATTTAAGACCACCAGCAGTACC
TTCATTACGCTATCTTCAAAATAGAATACCGACTATATGGCTGTCTGAGGACGATCAGGA
ACTGGTCAAAAATATTAACACATATGGCTACAATTGGGAATTGATTAGTGCACATATGAC
ACATCGCCTCACATATTCTTATTTGTCGAATATTGAACGTAGAACGCCATGGCAGTGTTT
TGAGCGTTTTGTACAATTAAATGAACGATTCAATTTTAGTGACCTCAAGGGTCCCAGAGC
ACATAGTGCTCAACAGTGGTTGATTGAAGCCCATAAATTTCAGCAGAGACAGAATAGAAG
AATATCGCCTTTAGGTGTAAATACAGAATCCATACAAAGAGGTCATAGGAGACTCCGTTG
GGCGAGCATGTTTGAGGCGATTAGAAAATGTATGAAAAAAAGAGAAAATACGCCGCGTCC
CAATCCAACCCAGCCAAGGAAACCGTTAGATTGTAAAAACATGAAGGTCCCTACCCCAGC
AGAAATGTCGCTTTTGAAAGCCCAAAGAGATGAGGCATTGAGAAGGGATATACAATTGAG
AAGAACAGTGAAAAATAGATTACAACAGAGGCAACAGCAAAGTCAGCAGGCACATTCATC
GCGAGCTCAAAGTCCAATACCTTCAAATGGCAAATCTTCTTCAAATTTGGCTAGAAATGG
GCAAGCGTCGGCTCCAAGACCAAACCAGAAACAGTATACTGAGCAAGATATCATTGAAAG
TTACTCGAGGAAGTTGTTGGAGCAAAAACCAGACATTGGTCCTGAGATGGCCCTTAAGGC
GGCAAAAAACTATTATAGAACCTTGAGAGAACAACAGCAACAGCTAAAGCAGCACCAGAT
TCAACAGCAAAGGCAGCAGTTACAGGAGGAGTCCAGTCATGTGCAGCAACTGCAGCAACT
ACAACCAGGGTCTCAAGCTCCGCCACCGAAATCATCTCCATCTCAATCTTCTCTTTCCAA
TATTTCTAACATTAATTCTGCTCCAAGGATAAAGTCACCAACTCCACAGGAGATTTTACA
AAGGTTCCAAAAACAATGATCTAACTTTACGACTTTATGATACTGATCTTTTTTTTTTTT
TAACCAGGCTTATATTGGTTTTTTGATTTTTATAAATTTACGAATACTATTATATATAAG
TAAAACGTTTTACTTCTCTGGTTTAGTATGTTGGCGTAACACTCTGTTCTCTGTAATATA
ATATGGCATCTACTTTTTTTTCAACTTCTCTACCGAATTTGATTATATTGTGGGCAAAGT
GGTCGTGCCCGATTCTTCCTTCGAATCACCCTTGGTGCAGTAATTAGCCTTCCATTTCAA
TTTTATGGGCTTACCTAAATTAACAGATATACCCTCTATGGAAGCAATCTGTTTGATACC
ATCTCTGGAGTTACTTTGGAGCATATTGCCCGATTGCGGTTGCAGAGACAATGTCGTGCC
TTTAGGTGATGCCACTAAAAGTGCAAAATTAGTTATTGGATCACTGCTTATGTTTGAATA
GAAGATAACTAATCGTAGTTTTGTCATCGACTCACGAGTTAATTCGTAATCAATGCGTAA
GTGATCCGATTGGTTAAGTATATGTCTTTGCGATTGAGCTGTGATTTCCTTGGAGTTACT
TGAACTATTTAGTAAACCATTAGGTAGAACAATCGAGTTAGAATATGCGGACAGAGCGGT
TTTACTTTCTCCAGGTTGCGAATCAAAATCTAATAAATCTATACCAGATGACTTTGAGTG
ACCGTCACCAAGTATATCAACAACAGTGTCGTTTTCTTGAGGAGACTTTGGGGATGACAA
ACTTACCTTATTAAAATCCCCTAAAAGATCGTCAAAAGGTTGCAAAGGTTTGCTTGGAGA
TGTCACAGATGGAGTGTTTGCTGTTGTATCGTCATCAAAATCTATCAAATTAAGCTCTTT
TGCCGGTTCATTCGTATCGGGGACATTTAGTTCTTCTTCCTTCATACCTTTTATTGACTT
GTACCTTTTTAACAATTGGATTACTAGATCGTTAAATTTTGATAGATTACTAACAAGCGC
ATCGTCATCGCGTTCTTCCTCAATAAGCTTTTTGAATTTCGGCTGCGCTGATTTTAAGTC
GCCATACAATTCTTGAATAGTTTCATTTTCAAGATCAGGCTCATCGGCTGAAGTCAACAT
TTCGTTGAATAAATCAGCTTTTCTTTTGAGTTTATTTAGTTCATTGTTAATTGCTTGTTT
GACTGCTACTTTAGTGTCATCCTTAAATCCCGCCATAATTTTCATCAGTTTATTAGCTTC
TTTCAAATCATCGGGTTTGCCGCTTCTTAGCAGCTCTTCTAGTTTTGCAGCTTGAGCTCT
TTCCTGTTCTTCCTGTAGCTCACTAGGTGTCCTCAGTTGGTCATTCGGTCTCAACACCGC
CAAGTTTTCACTCCCAACTTTTGGGAAAGTATAACCCTTGTATTTCAGTAATTTATGCAT
GTCGTTGATATATTGAAGATCATCTTTGTAGCTGGCATGTTTGCAGATGGTTTGGTACCA
TTCCTCGATGGCTTCAAGAATCATTTGTTGCACCTTGGAATATCTCAATGGTGGTTGCTC
TGGAAATCTTTTCACTAGATCATTTAAGAATTCCTTCCTGGAGATTTGCAAATGTATAGA
GTAACCACAATTTTTTACCAGCACGTCTAGTAGTGAAAGTGCAAAAACAGCTGCTTGCGT
GTCCCCATTATTGACCAATTTTTCAATTGCTAACACAGCCTCTCTAGGGGTTGCTCCTTG
CTTTGAGTTGATATAGTCGGCTACATCTAAGTTCAAGCCCAAATCTGGTTCAGGCAATGT
GGATCTACACGCTCTTTGTATCTTTCTGAGTAGTGAGCTCTCAGTAGACCGCGGTTTTCT
GACTGGTTCGGAGGTAAGCTCAATTCTTTGTGGCATTTTAAAAGACTCTTGTCTGGGTTA
TACTTGAAGTAGTGACTTGTCCCAAATTGCTTCTTTATCAAGATATTTTATATAATGATA
TAAGGGTTTTTAACTTGAAATGGTTATGCGCAATATTCACCCCTTTAAAAATACCATTAG
GTTTTAAGTTATAAATTTTAGGGCTTTTTGTTAATCTGTCATAGGTTATTGAGTTAAATA
GCAGGTTATTTTAGGTTTTGCGATTTAAAATATTCGGGGTCATTATTTGTTTTTTAGCCG
TTTTCTAGAACATGGTAAATGGCCAAAATTGCTGCTATTTCCACAGAGGGAGCCATCCAC
AGTAGCTAAAATAAGGACTTAACAAGTTTTCTCCAATTTGGGTAATTCAGTTACAGTTAT
TTTTTAACCATAACACAAAGTTCGCGGGTTTTTTTTACATGAAATTTGTGTATTTTAGCA
TTCATTAGCAGTATATTCAACTAGGTTAGTTGGCCTTATTTAGAATGCAAGACAACTCAA
GTCATTCCAGAGAGTCGGCTTCGGCTGGTGACGATCCTCTTGGAATTGATAAGTTGACAG
TCGACTACGATTACTTACTTTATAAAATAAGAGACTATGTACAGAGTATACAATTAGATA
CTACGGAGCTATGTAAAAAACAAAATGAAGTGATGGTGAATGGTATTATTGAAAACACCA
TAGATAAAAATATTGCGAAGTTCAAAGAACTCCTTGAAAAATGCGATACGTTGGAAAATC
ACTATGAAATGTTAAACCAACTGGCGATGATAACAGATACTTTCAAGGAAAGAATCGCAG
AGGCCGTAAATAATTACAATAGCTTAAAAAAGGGCGCCAGTAAATCTAAGTAACTTATAA
TACAAATATACCACATACATAGATATACCCTACGTATGTTTTATGCTGTATTTCTATTGG
AGAAAGAAATGAATAAACGCAAAGTAGTCAATACTAGGGAGATTAGCACACTACAATCTA
AGGTCACGATCTCAGAAACAAAAAGGTTTCTCATCTGTTTATGCTTCCACATTCACGGTG
GCTCGCTTGAAGATCAGTCTGCGTAGGAGTCGATGTACATACGAGAAATATGATGATAGA
GTAAGTGATACTACCAAGATATACGCCCGCTGCTACTCTCAATTCTATCTCTTAGTATTC
GCAATCTGTTATCGTCTGATCTCCTGTAAAAAGCAATCCTTTTCATCCTCACACAAGCAA
GCACTAAAAGGGCAACTGTTTTGAAGCTTAAGCGGCGTTCGAAATAGGGACCTCTTCTGT
TTAAATTGAATCTAAGCGGGTATTCATAGTCATGATACCTTGTATAAACATGGCTATTGT
AGTAATCACGATCTAGTTCATCATCGTCTGGAAGTGAAATGTTTAGACTGTGCTCACCTT
TCCTTGTGTCCAATCTTAAACGACGGGTCCCCAAAGCAAGAACCTTGTTTAAATAATCAT
TGATCACCTTAAGATCGTTGTTGTGTCTTACTTCTGAGTGATACTTCAACTTATAATAGC
TTATGATGTCATTTAATTGCATAGTTGAATCATTGTCTTTACGCCTCTCATTTAATATGA
GGCGTTCTTCAAGTCTCCTATTTTCCTCTTGTAAAGAAGTGATTTCACTCAAATAATTTT
TTTTTATCCTAGTCATCTTGTCTTCCATGATACGAATATTATTGCTGTTTTCATTCAACT
CCTCTTTCTCTCTTCTCAAACGATCATTAGCAGTAATCACCTTCTGTAGTTCGCGTTTAT
ATTTTTCTTTAGATTCCTGTAAGTTCCATTTTTCTTTATCCATTTCATCAAGTTTTCTGT
TCAAGATGGATATCTCGCGCTCTTTGTCTGATGCGGATTCTTTTTCTGTCAACAATCTGT
CATTTTCCAGTGAAAGATTGTTATACTTTCTCTTCCAGTTTTTTATTTCAATTTTTTGAG
AATCTCTTAGTGACTTTAATTCATCCTCGCTCTCTATTAACTTATTTTCCAGATTTAGTA
TTTGTAAATTTAGGTCATGTTGGATATTACTCTGTTCAGATTTCAATTGATTGAAATCTT
TTTTGTACCTGTCAATTATGGATTTTAATGAGCTTATCTCATCTTCTTGTAGTTTTAGAT
TCTGAGTGAGGTCGCTGATCTGTTCATCTTTTTGTTTTATATCCTTTAATCTTTTCTCCG
ACACTTTAGCAGAATTTTCAGCAATCCTAATTTTTAGTTCCTCAATTTTGTCTTCAGAAT
CTTTTGCGCTTTCTTTGTACTCTTCAATATCTTTCCTTAGCGATTCTAACTGCTTCTCAT
AGTTTTCTTTCATATGGTGAGTGGCAGTCGAATCGTCCTCTATTTTATTTTTTAGCTGTG
AGTTTTCTGCGGCTAAGTTAGAAATTTTTTTATTTAGCGTGGTCTTTTCATCTTCCAACT
TTGATTCGGAAATTTTATAGTTAAATTCCCTTTCTTTGAGCTCTTTTTCCATTTTAGAGT
ACTTCTCTTGTGCAACCTTTAAATCGTTTTCTAAAATTTTAATAAGTTTATCTTTAGATT
CTAGTTCATTATCAGTAATAGTTTTAGACTCACTGTGCGTTTTTTTTATCACAAATAAGT
CATTTTCTAGCTGTTTAACCTTTTTTTGAAGATCAGTTATCCGTTCATCCTTTGAAACTG
TTTCTTCTCTTGCTATCCTGATATCTTTTTGTAGCTTATCGTTTGTTTTTTTCAATTCTT
CTTCCCTTGAGCCCAACTGGGAGTCTCTTTGATTAAGTTTACTCTCCAATTGAGTTAGCT
GAGCCATTAATGATGCTAACTTACCTTCTTTTGCGATTAACTGTGAATTTTTCGTGCTAA
TCTCTTCCTCTAGCTCGGCTATTTTATTTTTCAGCATTTTCAATTCATTTTCTTTTGCAG
AAGACTGAGAACCATTTTCGCTGAATTTGGTTTCAAGCTCATTTAATTCATCTTTTAATC
TTTTTGATTCATTTTGTTTTTGTTTTAGTTGTAAATCCATCTCATCAGACTTGATTTTCA
ACTCATTTAATTCATTTGTTCGTTTCCTCAGTTCATTTTTCTTGAATTCCAACTGTGTAT
CCTTTTCTTCTGCATTGCTCTTCAATTCATTCAACTCATTCATTAAATTCTTCAATTCAT
CCTCCTTAGATCTCAATTTTAAACTTTGTACGTCACTATTATTCTCTAATTCTAGCACTT
GGTCTTTCACAGTTTTCAGTTTTCTTTCTAATTCAGCCAATTTTCTTTCCATTTGTTCAC
GTTCTTCTATGCATCCAGAATGATCATCTACTTTTCTTGAATTCACAATTTTATTTTTGG
CGTCCAGCTCTTTTTCCAGCGCTTGTAATCTGTTCTTCAAGTCATCCGTTTCTTCTTCAA
GTGTATCATAATTATTGAGAGTATCGTTTTTTTCCTTTCTTAGTTCTTTGATTTCATGCT
TTAAACTCTTGATTTCATTAATGTAAAGTTCCTTATTAGAAATATCAGAATTTGCGTATG
TTATGTGTCTTTTTCCTAGTAATTTACTCTCTAAAGCACGGTCAAATCGCTCTTTCTTCA
TTTGGTGTTCTCTTACTTCTTGTTCTTTCAAGGGCTGAGACATTGGCACATCTTTCTTCA
AATCATCAATCAAATTTCTCTTGCGACTTTTGTCAACATTACCTGACCTTGGACTAGGCG
GAATGTTAGCCTTAATTTCTGGAAAGCTGTCATCGAATTGTGAAGCTTCACTAAATAGCC
TTGTGGAGTCAATTGTATCATCAATGCTTCTTCTCTGTCTTTTCTTAACAGGGCCTTCGT
TCTCATCACCATTATTGGCATTTGGAACCTTAGTAGGCGATACAACTTGTGTTTGCGTGG
AGTTTCGCTTGGATTTGATAAATCCTACAGGCGTAAATTCCATGTTCTTCAAGCTCCCAT
TTGGGAGATGTGACGCTTCGTCCATGAGTGTTTATCAGCCCTTTTTCGCTTTGTGTGGAC
TGTAACTAACGAAGTTCCTTAAGATATCCCGCGCACATTGTATTTGTTCCACATCAACTT
TTTGTTTATTTGTTTTCCTTCAAAATGAAGGATTAAAACTTATAACGCGTAATTAGGGTA
ATGTTCAGCTTAGTACAAATAAAACATCTCTATCTAGTTTAAGTATAACATATGAAATAA
TGTCTACAAGGAGCTCACACTATCTATAAAGTGTTCTAAAGAACGTAATGCATTACCAGA
ATGTATGCTTTCTTCTGCCTTAATGATCCCTTCCTTCCAGTTCTGGTGACCTTGGCTTAA
ACAATATAACACGGCGGTGTTCATCAAGATGTAGTCATAAATAGGATTATTGTCGCCAAG
GTGGTACTTGCCGGACAAGACTTCTTCTTTTAGAATTCTCGCATTCTCTTTAGGGCCGTA
TGAGGCACACTTCGACAACTCGTGTTCTTCTAAACCAAACATAGAAGGTTCTAATTGGAA
GGTCTTCAATTTAAGTTCGGACGATGTCGGGTCAATATGCCAGACAGTAGTTTTGCCTAT
AGGTGATACTTCGTCTAACCCAACATGTCCCCAAACTATAAAGGTTTCGCTTCCTGGATA
TACCAAAGCGGCTGCCTTGGCATATTCAGGCGCAAGTTCCTTTGAGTAAACGCCCAATAT
TCTCTTGTTGACGTGGCTAACTGGATGTAGAAGTGGTCCCAGTACGTTGAAAACAGTCGG
AATTCCAAGAAATTTGCGTATCTTAGAAACGTGGCCCATTCCATGATGAAAAAAAGGAGC
AAGTAGAAACATGAACGTATTATCCGGCCAAAGTTTGGGCACTGTCGATGAATTAACCTT
GAACATATCACAGCCTAAAGTTCCAATTAGGTCACCAGCTCCACTATTGGATGTAGAAGC
TTTACCACCGTGCTTACAAATTTTTAGGCCCTGAATTCCGGAGGCAACGATAGCAGCAGA
CGTGGAAACATTAAAAGTATTCTGTCCGTCACCACCAGTACCTACAATATCTAAGATTAC
TGGTCCATCTTCCGGGTGTAATTCGTCCTTCTTGGGTAAAGGTAGATCAACAAGGTCGGA
ATGTCTGAGCACAGCCTTTGCAGCTTCCGCAATGTATTCAGCCTTATGATCAAGTTTAGT
AACTCTCAAAGCCGTGAGAAAACTCGAAACTTTGGTATAGATGGAAAGACTCTCATCGCT
ATTTGTATCACATTTTTGCAAAAGACTTAATATAACCAGCAACGCATCGTGTAGGTCTGT
GCTACTCAATTGCGGCGGAGAAGCCAATAATTTCTTAGTGTAAGATAACAAAGTCGCCTC
GGACATGATAAGGGAATACTAAGTTTTCTTGTGATTATTGCAGTTTAAATTCACTTAGTT
GTCAGTAGCTGTAATATCAGATGCTTTATTATAAAGTTATCCAGAAGAATGAATGCAACA
GAGGTTATGTTTACTGAATTGTCTGGTCTTGAATCATTTTTTAGAGAGTCAATCTGCGTA
GGTTTTTTTTTCCTTTTGGCAAAGACGACAAGAAAAATGCAGGTGGGGAAGCGCAGCAAT
AATATTAGTCATAACTTAATAGTCGGTGTATAGGCAACCACGCGTTACAAAGTAAGCCGA
TGGCCTATGTCATGTGTCTAAAAAGCTTAATTCAGACACGCAATATATGTAGATTATGTA
TTGGCTTTCTCTAATAATGGGGAAAAGAAATAAAATTCATGGTTTGCTTTTTGTTAAAGA
AAAGGAGAAAGTAACGATTTGTTGGATAAGTATACAAAAATTTGAGTGTATCTATTTTAT
AATGGAAAATTCATCTATTCTAGGGAAGTTAAGTATTTCTCAGCATCCAAAGCGGCCATA
CAACCAGAGCCAGCAGAAGTAATAGCTTGTCTGTATTTAGAATCCTGGACATCACCAGCA
GCGAAAAATCCTGGAACGGAGGTTAATGAGCTGCCTGGGACAGTTTTAATGTAGCCCGCT
TCATCAGTGTCGACTTGGCCAGCGACAATCTTTGTTGCTGGAGTGTGGCCAATAGCATAA
AATAAACCGCTGACTGGCAAATCGGTTTCTTCATTCTTTTTAGTGTTCTTAATCCTCAAG
GCATTCAATAATTTACCATCCCCCTTAGCTTCTAGCGCAACAGTGTTGTAAAGGATTTCA
ATTTTTTCGTTCTTCTCAGCACGCTTTTGCATAATGGTAGAAGCACGCAAATGGTCTTTT
CTGACAAGCATAAACACTTTTGAGCCGTACTTGGTCAAGAACTGAGCTTCTTCACATGCA
GAGTCACCACCACCAATGACGGCCAATGGCTTGTTTCTGAAAATGGGGACGGCACCATCA
CACACGGCACAGGCAGAAATACCTTTTTGCCAGTAGGTTTCCTCGCCCGGCAAATGCATT
CTCTTAGCAGAAGCGCCTGTGGCCAAGATTATAGCGTCAGTCGTCACAGGTTCTGCGTCT
TCGTTAAATTCGGTCCATAGCTTGAATGGTTTGGAAGACAGATCAACTTTGGAAACTGTT
TCCGTGATAATTTCAGTGCCAAACTTCGTGGATTGTTCTCTCATTCTGTCCATCAGTTCG
CTACCTGTTAGACCATCTGGGAAACCTGGGAAGTTTTCAATTTCTGTAGTGGTGGTTAGC
TGGCCACCGGCAGCAATACCGTTCGCCATCATACCTTCATATAGGATTGGCTTGATTTCT
GCCCTGGCCAAATAGATGGCGGCGGTGTGTGCAGCTGGACCTGAACCAATGATAGTAACT
TTGTTGTGAACCATTATTGATAATATGATGTTTACTTTCGTACTGTTCGCTATTTGCTGT
ATAGCACTTGTAGGCAAGTATAACTGAACTACAGAAATTAATCTACAAGCTCTTGAAACC
TCGAGCAGTTGGGTCCACTCTTATACGCGTGGGCATTTTTTCCTTTTTCGAGATACTTGC
GGGCGATTTTTTTTCTCCATGACTAAGGAGAAGCTAACCCAGCCAAAACCCGCCCCCAAA
TGGCTAGGCAAAGTGAAAGATTATTAATCCAGAACAGAATGAAACACTTACTGCCGTACT
GTATACTGAAGCGTTCACAGTGAATACATAATAACTTTCATTATTAATATTAGTGTGACA
AACTATATGTGTTTGTAGCTGTTGCGAATGCAAACAAGACATAGACGGTTTTACGTAAAA
CTGGCGCTAACTATAGTTGGGTACTTTTACACAGAGTACGAACGTAGTATTCCTATTGGG
AAAAAAGGGTCTCGCAAGGACTATCCCAAGAGCAGAGTGCATTGTTTAAATATAAATGGT
AGTACTCCGTAGGGAAAACTATGTTTGCGTTTCACCAGACAACAGTGATGTACGTTCTGT
CACTAGTTGCGCTGCACTGTCTTCTTCAGGACTGTATAGTTCTCTTTCCAGTTCACGTAG
TTGCATATCAGTTGCATAAAGGATATAGTATTGGTAGAAGTATATCAAATCAAACGCAAT
TGTTCCAGCACTTCCAAATATAAAGGGCAACTCATTCACGATGAATTCCCTCTTGTTCTG
ATTATCTAAAAATCTACAGCTTGTGAAGATGCTCAAATTATACGTGATATTGCAGAGTAG
TGTAGTAGCAAATAGGAAGGGAGATAAGCCGTCTGTAGACTTTCTATTGTAATTCTTGAT
TAGTTGTGGGATACGTGCGCCTACGTAGAAGGAAGCGCCAATCCAAGATAAAATTGTACC
CAGCTGGCTGTTTTTACCATCTCCGGGAGGCCCCACTTGTGATTGGGTGGAGCCTACATT
TAGCGGATATGCGCTAGCTGTACTTATAGTATGAGCTATAGCCAAGGCTGCTGTAATGGC
GGACCTTCTTCTACTGCTTCTAGGGCTTTCTGCACTGCTACCACCTTGTATCATGTCCTC
TTCCTCCCTCAAAAGCTCACCATTTTCAACCAGTTCGGGAAGAAGAGGTTTAGGCTCATG
GCCGACAGTCGCCAATTTATTTTCATGCAGCACGCCATAGTAATAATATTGACCACATAC
AAAAGAATCATTCAATAGAAAATAAATTGCTAAAAGTATCTGGAATAACAATTGCCCTGT
TAGCTTTGCCCCTATCAGCGAGGTAATATCCCCACATAACCAAGCCAGCAAAAAATATGG
CGATAGCCCATCGACAGATTTATCTCGATAAGTCTCAATTATTTGTGGAAACAATGAAAT
AACAGAGGTGAAGAAGGATAATGATCCGCACAAATTAGATACAGTAGGCCAGATGCCGTT
TGAGCACGACATGAAAAGATTCTTATTTTCACTTTATAATTTTTAGCACCGATAACAACG
AACCTTATCGATTGATATCAATAGATACTGGCTTAAGGTAATGAAAAGATTGCTTCTTTA
TTTGTCTTTGTTGGAGACGAATATTAATGCCTGCAAAAAGTACTTGACGTTTATGTGCAC
GTTTACGTTTGCTTTTTTTTGATCCCTCCTCAAGCGAAGAGATATACTAAAAGATATACT
TAGTGATAACACTGGTACCTATTGTCACTACAAATCACTGAGCGAAATCTTTTTTCTTCG
CGAACAATTTCTTCCATGCTGCGAAATTTTGCAGCACGTAAGTGAATGCCGTAGAAGCTA
GCAAAAAAAAATGGTGATGAAAAGGATAATAACAAAACACAATAAGGGCATTAGTTCATT
GTTTATTAAAAATGTATTATTATATTAATCGAAAGTAATTTCTGTATGTATGCATTTATA
AGTTTCAGAGTGAAAATGAACTTAAGAAGAGATAGTCTGGTCACCAAACTTTTAGTACGT
GCCACATACACGCTAACGTAATTTTCGGTAGTAGTGCAACCACCACTTTGTGAAAATATT
ATTGAGGTTTTCCTCTTCGATACTATCCTCCGTATACAGTGGAATACAAAAATGCTTATC
ATCCAAATCTGATAAATGTTTCAGATTATCATATCCGAAGTGGTAGTTTAACAATACGTT
AACTGTTAGTGAAACCAAAATCTTATAATTTACAATAACCTTCTTAGATCTATAGTATTC
CCATACTTTGTCTTTGAATATTTCCATTTTTACGGGGTAGTTTGCAAAGTTTTGGCCATT
ATGAACGATAATTACATCCATTACCCACATAAAAAGTTTATGGTCCATTCTTTGCAATAT
GTTCCACCATGTATTGCTATTCAAACATCCGCCATTGAATTCATTTTTGAACTCATCTTT
TCGTAAAAGATGGGCAACAATTCCTCTGGGATTTAATATTCTTGAATCGTATTTTTCCTT
GCAAATTTCACTGAAGCACGTCATCTGTATCAAGTTGACCATTTCCCATGTTTCCTTCAA
AGTCCCAAAAGATTGATCAGTTAAAAAATGGTAGAATAGCATCTCATCACCAGTAACCAA
ACCTTGTTGAGATATAGATTTCAGTTGCAGTAATAGCATCAAGTCAGAAACCACTTGCTT
ATCTGTTCCATTTTTATAAAAAACCTTTTCCTGTACATCGTGTTCAATAAGCTGTCTTAT
TTCAAATTCTTTATCTTTGGGAAAATCCATTTTGTTGAGTAGCTGCATTACTTCCTCAAA
TGATTCAATAAAACATTTTGTTATCAAGCAATTGTCACTTTGTAGAAGTTGACTATATAT
TTGAAGCCGTACTTTAGATATCAAAGGTGTTTCCCAAATAATTTTCTTTAATTCACTTAA
TGACGAGTTACGAGTAATGCCTCGGTCCAGTAAATGCTGGAATTTGACCTTATTCTGCTC
ATTCTTTTTGGCTTTTTCGTCACGTTCTTTATTTTTTTGCAACTCTTCCATTGATGCTAA
GTCGATATTTTTGTAGATTTGTTTATCTTGCAATTTCCTCTCTTTGAAATCCTTGGGCGG
GAGCCAACTCGGACGGAAATGACTTACGGCCTTTAGTTTGTCCTCTGAAACTAGCATTAG
GTCTTCCATTCCCTGACTACTGGCTTCTTTAAATTCCAGTGGTAAACTCTGTACAGATCT
TGAACGACCAGAAAGAATACTTTTGGAGATTTTTTCGGAACTATGCAGGTATATTTGGGA
GAGATTTTTCATTGTATCCTGGATGTACTGTGAATCAGACACAGGAGATATACCAGGAAT
GCATGTTGGCGGAAGCTCCTTATAGTCCAGACATGATTCTTTTAAAGTGTTACTTGAATT
TGATGTATGTTTTCTAGTACTATGAACCTGATGGAAAGTTTTGTCCACACAGAGAGCCGA
AGATGAGTGTTGTTTGCCTTCGCAATTGTTCTCCTGTATTAATATCTCTTCATCCCCCCG
CGCTGAATCTAAACTCATTTCTTTTCTATTAAACTTAGATAATGTTAAAAAAGAACTGGT
CGATAAAGATGCCATTGGAATGTTCCAAATTAACGAGCCGTCGACATCGCCCTCTTGAAG
TTCCAAGTTAACGTCTTGATCTTCATAAAATTTTTCTTTCATTTTTATGGCTTTACGCAA
AGATTGGTCATTTTGCTCTTTCCTTAAACGGTAACGTTGAGAAGGAGTAAGTTGGGTTGT
TTTATATGGTAATATTGCAGAAGTACTATTGGAATGCACATACGGCGTTTTTGTGATCGG
CATGAGTTTTGGTTCTTGGATAGTTGCGGTACTCATGCAATGATGTTTAAGAGGAGAGTC
ATTCTCGCTTATGAATGAAGTTTGTGATGCGGCTATACTGTTGGTTGTATTGCTCGATCC
AGGCAGCCCTACTGTCCTGGAGAGTTTAGGAGTTGACACCGAATTTTGACGAGATGGAAT
GCATGTAGTTATGGTACTCATTGAGCAGATTGTTTTATCAGCGCTACTTGCTGTACGTGT
TTTCTGTAGTCTTGATCCCGGTCGGCTTTTCTTTAAGGGCGTAATATTGCTTCTATGGTC
AGCTTCTCTCATACTTTTGAAGAAGCAGTTATCCTCCATCTTACTGTTTGCTATTTCACC
CTCTTCTGAGCTTATATCTGATGTACATAAAGAATCAGATGTCGTATTTGAGTGCGATGA
AGAAAATATCTCTGTGCTCGATGTACCTATAGAATCATCTGATATTGGCCTAATGCACTT
CGCTGTGGGTACGTGTGGATTATTATTACCTAATACATTTTTAACAACATCTTGGCTAGC
GAAATTGAAATCTAGGTTGGAGCTAGGGCGTCTTGTTCCAATATTCTTTCCGTTCGAACC
TGTAGTGCTACTGGATGCACTACTGCCTGATCGGGATTTAGACAACGGAAGGCTGCAACT
TTTGCGTTCGGTATATTCTGAAAGCATCAACTCCTTTGTGGAAAACTTCTTAGGTTGATT
TTGTTTCAGATGCGTTGAGTCCTCCTCCTTTAAAGGGTCTAGCTTAGACGTATTAGGAAC
TATATTAATCAAACGACGTGCTGTCATACAATAAAATTGAATGTCACAGAAAGCTAAAGA
GCTGAAGTAAAATAATGAAGCAAAGGTGGAAGCCCGAAAATAAAGTTAAAATTCAAAGCT
TGTAACGAACGTATGAATGAAAGCACTAATTGAGAAAAAACTGAATTTTGTCAAAACAGC
TCTATGTTTCAGAATGATAAAAAGGAGAGTTAAAAATACAATGGACAGTGGAATACAGCC
AAATGCTCGATAGCTTTCGCAGAAACAGTACAATTAAAGATCAACACTTGTATTCTAATT
ATAGCAGGATCGATGTTACATCTCTTTTGCTCTCTAATCGGATCTGAAAAAAAAAAAAAA
GCGTATATAGTGATCTACGCTGATTAACATTATAGATTGCATAAAAGGGAAAAAGGAATT
ACATGAAGATCTATTCTGCGCGACACACTTTATTGGCGTACTGGCAAGAATGGGCTTTCA
AATCTTCCAAGCGTTCACTTTAATGTTCTTATTGGCATGTTAAAATGTATATGCCGTGTC
TATTCCCAGCCTTTGGCTCAAATGGTCACTTCACCGCTGTTTAAACATATGGGTAGCGCA
GGGACATACACAATTCTACCTATTACAAATCTGCGCCATTTATCTACGAAAAACTGTCCA
TTGAAAATTAAATCAAATCGTTCAGAACCTTTGCAGTTTGGCGATTTTGAACGACAGGTG
CCATGTTCTAGGAAGAGCGGATCTTCGAAAAATGTTCAGAAGCGTTTATACGAGCTCCGA
CAATTGAAAACTGTATTAAGTGAGACTTTTGGAGTAACTGAATACGCCTCTTTTTTTGAA
TCTCTACGAAATGCCCTGCATATAAATAATTGCTCAGAAAATGAAAAGAAGAAACTTTTA
TATGATATCATTTTGCATCAACACGAGTTATACCCAGAGGTGGCAAGAAAAATTGGATTT
TATCTACCAGGTGAGGTCCACAGATGGTTCTGGTATCATATTCCAAAATCAGAATCTTTT
AATCACTATCTTTTTCTTTTGAAAAGTGATGTTCTTCTCTTTACTTCTAACTACTGTACG
AGATTTACCAATAGGCTGATAAAAGGAACTGAGATGGAGAGGCAGTTAGCCACGTTCCAA
ATATTTTTGCATGATGAGACAAACATAAAATTTATAATGGAAAAAGTTCTGAAGTTGCAT
ACATTTGACAGCTTAATCGCTCTAGTAAATGGCCTTGTTAAGGCGAAAAATTTTAGGTTC
ATTAAAGTATTTATTCAAGCTCTACTACAGAAGTTGGAACAGCACTGTTATTCTGGTAAA
GATGGAGCAAAGCAAAAGAACCTGCGTTATGTCAAGTTCAACAATACCTTACTTTATTAC
CTTTTGAAAAGTGGAAATGTTGAGTTATTCATCAAAACCTTTCAAGAGGAACTGAAATTC
ATTGTAAGCTCAGGATTGCTTAATCACATTGATGGAAACGAACACATATTGAATTTTCCC
ATTGACCACTACTTGAATCTGCTCCGAATATCTAATAGGCAGGAGGAGCTTTTCAATGTA
ATTTCCTGCTTACAAAGCAGCCCACTGATGAAATATAAATTGTTCAAGGAGTTTTTAATG
GGTGAATTAATTGCATCTTTTCAAGCCTTTCGTGACCCGAAATTGGTGTGTAAATATCTC
CTCTCATCATACAGCTCAAAGGCGTCTGCTAATATTCTGAATGCCCTAGGGATTTGGGGG
TGGCTCTATCATTCAAAATCAACGACTTTGACAGCTCCTACGTTAGCAAGAGAGCTGAAG
AACAAAAATAATATTCTACCGAACACAATGCGAATAGGGTCACCAGTGACTGTTCCAATT
TTAACTGAACTGTATAGAAGCCTTTTATCTTCGAGTTCTGTTTCACTGGAAAGTGGTCAA
TTCAAGAATTGTCTTCTTGATTTATATTACAAGTACAAGAGTTTTCTTTCCGAGGAAGCT
CATAAATACAGGTATTGGAGAAATGATACCGGAATCCTCAATGTTTTCCTAAATTATATT
AGATTCCAAGCTCGTGAACCAAGGCTGGCCTACAATGTTCTTCTGGATTTTTATTCTCAA
CCTTTCGCCAAAAAAGTGGTTTTAACTACCACGCTATGTCCCTTTTCCATAGTAGCCTAT
AAAAATCATACATTAACGCAGGCTGAACTATCAGAATTGCTACAGGTGATGCATAAAAAT
GGGGTGCCTTTAACGTTTAAATTTTGTTCTGCAATGGTAATGCATTATGTCAAAATGAGA
GACGAAAAAGGAGCACGCTCCTGGTACAATAAGATACTCTTCGGGGGCTTTGAAATCAGG
CATATGGCTTTGATACAGATAATAAAAGACCAAGGCTGGCCGTTTCCCAAAAACTTTGAC
GAAACTTTACTGACGGAATTGGTGGAAAATAATAACATTAAAGAACCTACTGATAGCACC
CTGTTTACTGACGAAGATATGTTCGAAGAAGATGGCAAGCCTAGATTTAATGATGATGAT
GTTAATAAATGTACAAATATTATAAGAGAGACATTGAAAAGTCTAAATTAATATCCAGAT
GAGCACTAGTAAATAGTAAATATTCATTCATAGATAGTAATTTACCCATAAGTTATTAAT
ACCTACAAAGTTTTTTCATAAGTTTATGAATATGTCTTCTTGGCCCATGGTTACTTTATT
ACCTCTAATACCTTATTTACTTTCTCAAATAAATGAGCCCTTGGATTTCATTTACTGAGA
ATAAAAAAAGTACCGTGCTCGGCAAAAATGCTCCAGGGGAGGTTCGAACTCTCGACCTTC
AGATTATGAGACTGACGCTCTTCCTACTGAGCTACTGAAGCTTTGTTTTGTACAGACGTT
ACATCTCAGAATGGGATACGTCAGCATGACAATACATTATCCTGAACGTTCATAGAACAC
ATATGAAACCTAAGAAAACGAACAGATTGAGCAACATGAGGTAAAACTCCGCCTTCTATA
GCTGGGCTATCTAAACGTATAAATGCCTGAACAATTGGTTTATGAGAAATGGGTGTATTT
TGAGAGACTTGTTGGGATTCCATTGTTGATAAAGGCTATAATATTAGGTGTACAGAATAT
ACTAGAAGTTCTCCTCGATGATATTGGAATCCTCTAAATGGAATCTATATTTCTACATAC
TAATATTACGATTATTCCTCATTCCGTTTTATATGTTTCATTATCCTATTACATTATCAA
TCCTTGCACTTCAGCTTCCTCTAACTTCGATGACAGCTTCTCATAACTTATGTCATCATC
TTAACACCGTATATGATAATATATTGATAGTACAACTATTAGTTGATAGACGATAGTGGA
TTTTTATTCCAACAGTTTAGATCCAAGATTCCGCGCTTCCACCATTTAGTATGATCCATA
TTTTATATAATATATAGGATAAGTAACATTCCGTGAATTAATCTGATAAACCGTTTTGAC
AACTGGTTACTTCCCTAAGACTGTTTATATTAGGATTGTCGAGACACTCCGGTATTACTC
GAGCCCGTAGTACAGCGCAGGCCTCCAGAGTTGAATTATTCTAAATTCCTGAATAATAAC
AATTTTGCAGACAAAATTCAGGCAATAACTCAAAAGAGTAATCTTTCACTGCATTTAAGG
CGCTAAGATTCCCGCCAAAAGTAGTCGTCACAAAAGAACGTATATAAAATGTGAAGAGAA
TGTGGATTTnTAAATACTAGTTAGTAGATGATAGTTGATTTTTATTCCAACAAAATGCAC
TTTCGAGCGGTGACAATGTGAGAAATAGGTAAATATTGAGACAATTGTTGGGATTACCCT
GTTTCTCATCTTTTATGTCATCTTTTTACACCGTATATGATAATATGCTAGTCGATAGAT
GGTGGTCGATTCTTCTTCCTGTATACAAATATATGAGTTGGGGATGTATATTGCAAAGAG
CTTGATTATGACACATTGCCAGACCAAAAAACAAATCTCTTTCTATAATGTTCCCAGGTT
GGGCTAATTTTTTAGATAACGACGGCAGTATATTAATATTGAAGAGAGTTGTATTTATTG
TTCGATATTTATTTTGATATCAGCTTTATATTGTAAGTGTTCAATATTTTAATTAGTGTG
TATTTCGTAACTTTACTGCCAATTATCAACATAATTACAAAGTTGTTATAAAAATTGATG
CACTAATGTTTCGGTTCTTGCTCTTTTAACCAACCGAGCCTAAAAAAGAGGCTCTTGAAA
CTAATTTGACCCAAACAATGAGATCTTCATTCTTTTTTTTACCTCAGCTATGACTTGCAG
TGCTTTGTATCATACCGCTCGTTTGGTCGTGCTATTTGTAACAATGAACCTCGTTACCCC
GAACAAAAAAAAATGAGATATTGAACGCCGCAGCTCATCATGGTAGAATGATGCAGCTAA
TACCAAAATAAGTTATATTTAGAATGTTGGATATATCAGTTGCGTTAGACTAATCGTTCT
AGAAGGATACAGAACTTGGAAAGATCTTTGAACGTATCGTGACTGCGTGCTTGCTTTATT
TGCCGTTGATTTTTTGCTATGACATGCCTAATTTTATGGTATCTGTGGCTCATATCAACT
TTTCAGTTAGAGTTTGCAACGGCTAGTACTGCAAATACAACAACTACAGCAAAGTCTGGA
ACCTCTTCGTCAACGGAGGATCCGTTTCCTGTACTAGCCGTGGGTAAAGATGGTAGAGGA
AACTACTATGTTAATAGCACATTTGGCACTCCCGGTCAACGCCAACGTTTGCTAGTGGAT
ATTATCCAACCGTACATAAATCTGGTTTCCGGAACAAGCGAAAGTCATAACGAATACTCC
AGTGTATATCATAAGCATCCCAGCTACCTCATGAATGACTCTACATCATCTGTTCTTGTT
TCTCCTGGCCAAATATATGAGATTTCTTTCATTGATGGTAGAGCTGTTAACTGTACTTTG
GTGACAGACGATATGAATTTTACAAATGTTTCCTCAGAAAATTCCTCGACCGCTTTGATA
ACCGATTTAATGGTAACTCGAGATAACGTACAATTTGACTCGGGAAGCCTATCGATTTCA
AACGTTTCCTTCTTTGATATTCAGTCCTCGAATTTTAAGACTTCAGGCTTGTTAGGTTTA
AGCGGGAAGGTCACAAACCCAGGCAATGCTATCGATAGCTCACAATACACAGAACAGTCT
TATTTTCTATCCTTATTGAAAGATGCAGATATCATTGAAAGTTCGTCATATTCACTGTGG
TTGGCTGGAGACACTTCCACGTACAAAACATATAGAGATCCAATATCTAATTGTGGGAAG
CTACTTCTTGGAGGGGTGGATCCTTCGCTGTTTACCGGTACACTGGGAAAATTTGACTTA
ATTCCTTACGTTGACCCAGTGAGTAATGCTGTTAGTGTTGGGTACCCAATTGTGCCATTA
GGCCCTATTTATATTGTGTCTAACAGCGGACAAAGTTTGAATATGACTTCGAAGGACTTT
CTGAGCCCAGCCTTACTTGATTCAACTTCTTCGGTCAGTTACCTGCCAACTAGTACCATT
ATTCAGATTGCCGTTCAAATTGCGGCCACTTATGTGGAATCACTAGATAGGTGGCTAGTC
CAATGTTCTATAGCAGATATGGGTGTCTCCTTGGGTTTCAGGCTTCGAGAATTGACAATT
GAAATACCCCTACGTGATTTATTATCATCTACTTACGATACATCCACTAATTCTTCAATG
TTTTTCAGTTCTGGACAGGAAGCTTGTTTTCTAACACTATACGCTAATACAAATACTGGA
GTAAACATACTCGGAGAAGCCTTCATGAAAAATATATATATGGCAATGGACTTAGAGGAT
AACACTATAGCCATTGCACAGGCAAAGAAGGTTGAAGATGACGCAGTTACTGAAGAGACA
AATGAAACTACCGCGTCCACTATCATCAAGAAGATCAGATCTGGTTACATTCCTTACGCA
AAAGTGATGAATAGTAGTAATACAAGAAACTTGACTCTTTATCCATCCTATAGGTCAGGC
TATATGTTCACTGTCCCAGGTCAACTGACAGCAGCATACTCAAACGGTGTGATTACAGGT
GCGGGCCGGTCATTCTATGATACTTCAAGAGCAAGCACAAGTGCTAGACCATCCAGTAGT
CAATTCGACAGCTTTTCTGTGTCAGCCTCAGAAGAGTGGTCAAATTCAACTAATAGAACC
AGCAGTGCTTCGGGAGCAGGCGTTCGATTGAGCAGTCCTTATACATTTAACAAAGATCCA
GCTGGACATGTAACTCGTATAGCTTCCTTGCTACTACTTTCGATATTCTCGATACTTATT
GTTCTTTGAATGGTCTTAACAAAAGTTCATAACATAAAACCTTTTTCTCCTTGACCAATG
CACGTATAACATCATTATATAGCAGATTTAATAACAACATACTTAAAAGTATATATGCGT
CATTCTTATCCAGTTGTGTAGAAGCTAGTACTTGTGATCAACCATTGGCAGCCATCTCAA
AGAATCGTCGTGCACGGAGCGTAAATCGCGTTACTTTTTTTTTTGTTTTTTTTCCCGCCT
CGAGGTTGGTTCAACAGCAGATCATGGTGACTGGCGATAGGTTATTCACTAGAAAATGAA
GATACTCTTTCTTGGGAGGTAACTCTGTAAAATTTCTAATTTGTATTTTATAGTGTGTAG
AATCCGAAATATATCCGATCTACCTCGCTCTTTTTATTGTTATTTTTATTCGAGGAATTT
AAGTGTTTTGCAGACCTATCCCTTCGAACACGTAACGTCATTTTACCATAATCTTCGACT
GCTTAATTGTTGATACATTGTAGGTTCCATTACACTTTGCCAGCATTTTCCTTTTTTAGA
AAAATTGATACATATACGCAAGATTTAGCATGGAGAATAGAAACAGTAGTACCTCTAGTA
GGCCATTTTCTGTTAATAACCCGTTTAGAAATGCCACAGTTGATTCAAGTATTAATCAGT
ATAAAAATGACTCCCAGTTTCAGGAGTGGGCGAAAAACCAATCTCGTACCAATTCATTTG
ATATGCCACAATTGAACACAAGAACTTCTTCACAATTATCATTCCCAAACATTCCAGAGG
ATGAACCCCAGCGAAACGCAGATCAGCAGGGTGCTTTTTATTCTGGTTTGGAGAGCTTTA
GTAGTGGTAGTTTATCACCACCTTCGAGACCTCTTTCCTCAAAGAATCCTTTCCTAGACG
ATGTGAGTTCTGCAACCGATTTTAGAAGGTCTCCCCCACCTGTTTCAAGGAATAAAAATC
ATCCGACTGCTAAAGAAGAAAAAGAACAATTAAGGCAAAGATATTTGGAAGAAAGTGACG
TAAGTACAGTAGGTAACACAAGAGAAAACACTGACCTACCACCCTCATACGAAGAGATCA
CTTCAACCAATGGATCAAGGCGTGCATATCCAAAGGAAAAGGTTTCTCGTCCTTCTTCTC
ACCGCGAACATAGCAACAGCGGCACATATATTTCACGCAGATCTTCATCCCACCATCACC
GTGAAGCTTCCTCATCTTCAACGCCTTCTAAGAAGGGAAAGAGAAAAAGTAAGGTTATTG
TTCCTAAGAACGTCGATACTATCGATAAGTTAGATGTAACTGGATTGTTCGGTGGCTCAT
TTCATCATGACGGCCCATTCGATGCAGTAACACCTCATAGAAATAAAAATAACAAAGCTG
CGCCTGTTTTAGCATTTCCGGTCGATGGTCCAAACAGTACCATCGGTGGCGCTTCAACCA
AGAAGTCTGCCCTGGATGAGGTTTTTGGGAGAGATGATACAGATGATTCTGATATATACC
AGTACAGTTCGCAGACTCTAAGGAGAGGTGGTGATACGCAGGACGCAATAAAAGCAAACG
TGGGTAACGTCCAACAAATGGATGCCAAAAATAAGACAGAATTGGTTCATGGGCCAGTTA
CTGCGGGATTAGGTTCTAGTACATTTTTAGATGGGGCGCCGGCCTCCTCAGCTGCCATTA
GAAACGACATAAAAGCCCATTCCTATCATAATCGTAACGGTGGTTTACAAAGAAATAAGT
CACTTTCTCAACGATTAGGTCTCGGAGGATCCGGTGATAGCAATGCCCCCATGACAGGCG
TTAGAAGAAACTTGAGTTTAAGTAGAGACAACTATGATGTTGGTCACAGCAATGAAGGTG
TTAGAAGGTCGAAAACCGTTAATTCTCCTAACAGAACGCATAAGTCCAATTATACTACTG
ATTTCGACGGCCAAGATGATCACAATGAAGATGAGGAAGATGTTTATTTGGGTGTGCGCT
ACAATGAGCCCAATATGAAAAAGAAATCGACGGGCAGCAAATTACTGAGCAGAGTAAAAA
GTCTAAAGGTCGGCAGGAAAAGTCAGTAAAGTGAGCTTAAAAGAGAGAAAAGAAGCTATG
AGACACCAAAGCCAGGCAAATAAAAGGGAGAGATACGAATAAAAATAATTTAAGACCACG
TTATATACACATTACGAATAGTTTGACTTTATATATTTACAGAGACTACCAACTTATATC
AAAAGGAAAAAATTCCCATTACCAGTTTCATTCATAACGTGTTGAATGCTTGGATCTTAG
TACGTTGAGGTAACCTTGACTCTACAATTTTCCATTCTATAGAGTCCCATACCCTTTCTA
AATATTCTCGTTTCCCAAATACGCCATAATCGGTTAACCATGTTTTTGGTGACGCATCAA
TGGCTAAAAGCGGGATATATGAAACCTCTTTCCCAGAAAAACCTTTCTGTTGGGTTTCAT
AAATAAATTTTGTCTTGGCTTGCTTGGCAGTCATCTCAGAATCTTCAAGATTACCGGCTT
CTTTGGCTCGTTGTTTTTCCATGTTGGTATATTGGTTATTGAGCTCATTCATTACTCCAG
ATGTAGAGAAGTTGAAGGGAGTTCCCGCATTGTACGTATTCAATATAAACAGCTTATCAT
ATTCAATATCCCTGTTTGGCATTTCGTTGCGCATGGCACGTTTGTCGAGCTGCCGTCTTG
CGACTAACCACGTAAACCCGTCGCCTGATATAGCAAGATTTGAATTTATTAATAATGTTC
TGAACTCCATCAAAGACCCAAATGAAGAAATTAGAGCTGCTTGCAAACGTTCGTTGCCAG
TGGTCAATGGCTCATTGCTTATTGTCCTATTGAAATCAGGGGTCTGAAGTAGCGCCTCTG
GACCTAGCCTGGGGCATTCCTCTGGCGGAGTCCTGATACATCCCTGAAGGGAAGACATGC
TAAATTTCAAGTTGTACAATGATGACGCGTAGTTCACGATATGTTTCTTTGAAGCAGATT
TCGAATTTTCATGGATGAGAGTTTCTAAGGGTTTTTGTTGCGCTTCATTTGTACAATCGT
TCAATTTTGCATCGAGATATTTCACTCGGTCGAACCATGCTTTCTGTAATCCTTCAGTAG
AAAACAGCCCTTTCAGAGGAGCACCTTCTTTCAGGTGCTCGAGTGCATACCTAGTAGAGT
ACTTTCTAATAGCGCGAGCACCAGTAAAGCGAAGCATGGTGCTGGAAACCTTAAAATTCA
AAAGTATTTAGATTCCCCCAGCTGTTAAATGGTAAACCACTGATTGTTTCCAGATCCTAG
CTAAAACTGCGGTTCCTCCCACCGTTTCTGCCATACTTTTCATCACTTATGCATTATGAT
ATTGCTCTTGAGAGAATCTGAGCAAAATCCTGCATAATATAAATCTCACTTTCCACGGAA
CTTCAGGTCCGGTTTATTACCGCTTTTTTTCGTTGTTTTTTTGTTGTTGAGGAGGCAAAC
TTGCGATGAGTGGGAGAAAACAAAAGCGAAATGACAGCTGGTTGATTGAAACATTCGGGG
ATATCTTGCAAGATTACTCCTTGAGATTCACGAATAGCACGGCTTTTCGTTTGTTATATA
TAGATAGAGCCTGTTGATAGAATTCTTTTGTATTCGTTTGATAATTTGAAATCTGTAGAA
GATCAAAAGATTCAGTCATTTATTGCATCGAATCAAGAAAAAAGAAACGAATAAGCTTTT
GTATAATATAATATAATGTTGAAGTGGATAAAAGGTGGGATCTCAGCAGTCACTGGTATG
GCTGAGCCTGAATATGGGAAAGATTACATTCATAGTGTTGCTGATAGGGTAAAAAATAAG
CAGCCTTACAGAGAAACCAGTCGTGAAGATTTTTTTTGGCAAGCTCCTGACCATACAAAC
GTTGAATCGGTTATCTTTTATTTCAGTGACTTGAAAACAGGTATCTTTGGATTTGCCCAG
GTTATTCATTCGAACATCATTGGGTTGCACACTGCATCCCAATTTACTTTCAGAATTTTT
GACTCGAAGAATCCAGAGGATTTGAATATCTGGACTTCCACCAAGTTGGAAAATTTTTGC
ATCGAAGGTCCAAACTTCTATGCCGACAATCTTTCTGTAGAATTAAGTGAAGACGGTGAA
AGCTATCACATTCAATCCAGTGTTTGTGATTTATCTGTCGTTGACTTGCATATAAGAAGG
TTAACCCCTGGAGCCAAGATAGGCGATGATCCTGCGACTTATTATGGTAACAATATCAAT
GAACCATGGGGTAGCATGAGACACGTTTTCTGGCCAAGGAATGCTTGTCACGGTACTATC
AAAGTTAAGAAAGAAGTTATTCCAGAATCTGATGAAGAAGAATCCTCAGCTGATGAGGAT
GATAATGAAGACGAAGATGAAGAGTCTGGTGATTCTGAGGAGGAATCTGGTAGTGAAGAA
GAAAGCGACAGTGAAGAAGTCGAAATCACCTATGAAGATCGTACGATTACTTTTAAAGAG
GAAGACCCTGCGATTTCGACATTTATAATGGCCTTCCAAGGCATGAAGCCTCATCACGCA
GCTAAGGCATGGAACTTCATGTTTTTCCATTCCGAAAAGTATTCCGCGGTGTTGATGGAG
TTCACTACACCAAAATCATATGCCAACACTAAAATTTCTGCTGGTATTATTACCGATGAT
AAAGAAGTTTTAGCGATGACAACTAACAATCTTGTTGAGCACTTAAACTCAGAAATTGAT
TCTGTTGGTTGGAAAGTTCCAAAAGATATTAAGATCACCTTCAAAGGTATCAATACCAAA
GTCAAGGATGAACAATTGGAATCCGAGAATGGGACTGAACAAGCTTTACAAGGAGAGGAT
GAAAAGGAAGATGAAAAGGAAGATGAAAAGGAAGATGAAGAGGAAGAAGAATACAAGAAC
GTCGCAGAAGAAAATAAGATCTGTGCTGTTGTGGAGGGTCCGTTGAACAACCTAGTTGAA
AGAATTGATGTGATGGGCGAAATTCCAAGTTTTGTTAAAAACATCGTCTCTGGTGTTGCT
GGTACTAAGCCATTTATATACCAATATGCTGATCCAAAAAGCTCAACTTTACAAATAAAT
GGCGGGGAGAAAATTCACGGTGTAGCTTGGACCGAAGTAACATTCATTTCTGAATCAGAT
GTGATTAGTGAGGAATCTTACAATGAAGCATGAGCAAAAGTGGGAAGGTCTCGTATGCTT
TTTCCTATCTGTGATTTAATACTACACAAATCTAATATTGCAAATTTTAATAATTATAGC
AAGTTATCGTTATACCCCTTTTTAATTGTTGCGTCACATAATCGATACTATTGTTCAAAA
TAAGAGTGATGCGAGAAATAGCCACAGTAAACAATGTTGCCATAATAAATAGTTGTCGTT
TTTATTCATCTCATTTTTCTTATGTATCCATACATATATATATATAATGTAATATAGCCT
GAGCAAATGAATAAAGTTTTCGTGGATATCTGCGAAATATACCCTTGCAAGCAAAACAAA
AGAACTCTCAGAAAAGGTTATAATACAGGTGCTAGTAGGAGTAAGTACGTTCCTGGGGCT
TGGTATTTATCGGGATGAAGTGATCATATGTATTGTTCCAGGTTTAATGAAACACCAAAT
GTATTTAATCAAAAAGAAAACCTTCCAGACTATTTTAAATGGCTCAAATACAAAATACCG
CAACTATGCACTTCGTTTTAGGGATCCATCTAATCTGCAAAGTCGGAAAATGGAAACGAT
CCTATTGACGCGATCCTTATGGGGTAAATTAAAAAAACCTTCACGTTAGGATACTACAGC
TGAAGTAAGCGTCTCACGTAGCGCGCAGTCTATTTTTGGAAGTTAGGGGCTAATGATTTT
CTACGGCTGCCGAGCATGGATGATGCCTTTATTTAGAAGCATGTAAAAAAAGCGTCTCAA
AACACGGAGAAATGCACTAACAATGGGTATACTAGACTTGTTAAATTCAAATTTCGGCGA
AAAGAGACTTGTATTTCATTAGTTACTTTTCGTTCAGTTAAGCATGATCGTCTAGGCGTT
CCATTAACTAGTATCTTGGTTCTTTATGTAGTTTGAAGTTATCTCTGTAATTAGGCTCCT
CATTTGCCAAAGTTAAGTATTGGATGTGTGTGCAGTATGCTTTCATGCCTCTATAGCAAA
AATCAATGGCTCTCAAGAAATTTGTCGTAACCCACTTTAGCATATTTATTTACATTTTGT
CGGAATATTATTTCTTCTCTACAGAAAAATGAAAGCAACAGAATTGAATTTCGACAAGTC
ACAAACAAACTTTGTAGACTTTTTATTACAAAAATTTATTAAGTGACATTCACTACTTGT
ATTATTGTGAGAGAAGTACATAGCACCGGGAATCTTAGACAGGGTTACTACTAACTACAA
CCCTCATACTGCCTTACGTAGCCAAACAAGAGCAGTTCTCAGATTACAATGGGAGATCAT
TTGAAAATATCAAAGATTGATCAAGAATATTTTACTGGTGGCATCCGCCCGCCCTTTAAT
TTCGGAATTTAGTGCTGCTTACAACTCTTCATTTTCCTCATGCGGGACGCCAGCTTTGGT
GCGGGATGAAGGCAATATCCAAACCAGCATCAGGAAAAGCCTGAAGAAATGTGGTGCCTA
ATGCTCTTATCTAATCTGTATCCACACCTTACAGCGAAGTGTTCAATTAACTGTGCGGCT
AATTCTGACACTTCATCAAAAATTACACCGGTATATCAAATGGCGGTGTAGTTTGAAAAG
TACACTGTATGTCCATTAATAAAATTACGCCGAAGAACACTGACTAGCTATAAATTCTCT
TCCGGCGTCCAATTTCAACCTAAGGCAAGTATTGTTAATCAATAATGCGTGTTGGTAAAT
ATGAAGCCCGATGTTGATTAAGAAGAATTATTCGTATAAGAATTAAGCAAGCAAAATTAA
GGAAAATTTTTTCTTTCCTATTCGTCATCGCAGACAGCCTTCATCTTCTCGAGATAACAC
CTGGAGGAGGAGCAATGAAATGAAAGGAAAAAAAAATACTTTCTTTTTCTTGAAAAAAGA
AAAAAATTGTAAGATGAGCTATTCGCGGAACATTCTAGCTCGTTTGCATCTTCTTGCATT
TGGTTGGTTTTCAATAGTTCGGTAATATTAACGGATACCTACTATTATCCCCTAGTAGGC
TCTTTTCACGGAGAAATTCGGGAGTGTTTTTTTTCCGTGCGCATTTTCTTAGCTATATTC
TTCCAGCTTCGCCTGCTGCCCGGTCATCGTTCCTGTCACGTAGTTTTTCCGGATTCGTCC
GGCTCATATAATACCGCAATAAACACGGAATATCTCGTTCCGCGGATTCGGTTAAACTCT
CGGTCGCGGATTATCACAGAGAAAGCTTCGTGGAGAATTTTTCCAGATTTTCCGCTTTCC
CCGATGTTGGTATTTCCGGAGGTCATTATACTGACCGCCATTATAATGACTGTACAACGA
CCTTCTGGAGAAAGAAACAACTCAATAACGATGTGGGACATTGGGGGCCCACTCTAAAAA
TCTGGGGACTATATCCCCAGAGAATTTCTCCAGAAGAGAAGAAAAGTCAAAGTTTTTTTT
CGCTTGGGGGTTGCATATAAATACAGGCGCTGTTTTATCTTCAGCATGAATATTCCATAA
TTTTACTTAATAGCTTTTCATAAATAATAGAATCACAAACAAAATTTACATCTGAGTTAA
ACAATCATGAATTCAACTCCAGATTTAATATCTCCACAAAAGTCAAGTGAGAATTCGAAT
GCTGACCTGCCTTCGAATAGCTCTCAGGTAATGAACATGCCTGAAGAAAAAGGTGTTCAA
GATGATTTCCAAGCTGAGGCCGACCAAGTACTTACCAACCCAAATACAGGTAAAGGTGCA
TATGTCACTGTGTCTATCTGTTGTGTTATGGTTGCTTTCGGTGGTTTTGTTTTCGGTTGG
GATACTGGTACCATTTCTGGTTTTGTTGCTCAAACTGATTTTATCAGAAGATTTGGTATG
AAGCACCACGATGGTACTTATTATTTGTCTAAGGTTAGAACTGGTTTGATTGTCTCCATT
TTCAACATTGGTTGTGCCATTGGTGGTATTATTCTTTCCAAATTGGGTGATATGTACGGT
CGTAAGATGGGTTTGATTGTCGTTGTTGTCATCTACATCATCGGTATTATTATTCAAATT
GCATCCATCAACAAATGGTACCAATACTTCATCGGTAGAATTATTTCCGGTTTGGGTGTT
GGTGGTATTGCCGTTTTATCTCCTATGTTGATTTCTGAAGTCGCTCCTAAGGAAATGAGA
GGTACTTTAGTCTCCTGTTACCAACTGATGATTACCTTGGGTATTTTCTTGGGTTACTGT
ACCAACTTCGGTACTAAGAACTACTCCAACTCTGCAATGGAGAGTTCCATTAGGTTTGTG
TTTTGCCTGGGCTTTGTTTATGATCGGTGGTATGACTTTCGTTCCAGAATCCCCACGTTA
TTTGGTAGAAGCTGGTCAAATTGACGAAGCAAGAGCATCTCTTTCCAAAGTTAACAAGGT
TGCCCCAGACCATCCATTCATTCAACAAGAGTTGGAAGTTATTGAAGCTAGTGTTGAAGA
AGCTAGAGCTGCTGGTTCAGCATCATGGGGTGAATTGTTCACTGGTAAGCCGGCCATGTT
TAAGCGTACTATGATGGGTATCATGATCCAATCTCTACAACAATTGTCTGGTGATAACTA
TTTCTTCTACTATGGTACTACCGTTTTTAAGGCTGTTGGTATGAGTGATTCTTTCGAAAC
TTCTATTGTTTTCGGTGTCGTCAACTTTTTCTCTACTTGTTGTTCTTTGTACACTGTCGA
TCGTTTTGGACGTCGTAACTGTTTGTTATATGGTGCCATTGGTATGGTCTGCTGTTATGT
AGTTTACGCTTCTGTTGGTGTCACCAGACTATGGCCAAATGGTCAAGACCAACCATCTTC
CAAGGGTGCTGGTAACTGTATGATTGTCTTTGCCTGTTTCTATATTTTCTGTTTTGCTAC
CACTTGGGCTCCAATTGCTTATGTTGTTATTTCTGAAACTTTCCCATTGAGAGTCAAGGC
TAAGGCTATGTCTATTGCTACAGCTGCTAATTGGTTGTGGGGTTTCTTGATTGGTTTCTT
CACTCCATTTATTACTGGTGCTATTAACTTCTACTACGGTTACGTTTTCATGGGCTGTAT
GGTTTTCGCCTACTTCTACGTTTTCTTCTTTGTGCCAGAAACTAAGGGTTTGACTTTGGA
AGAAGTCAATGATATGTACGCTGAAGGTGTTCTACCATGGAAGTCTGCCTCATGGGTTCC
ACCATCCAGAAGAGGTGCCAACTACGACGCTGAAGAAATGACTCACGATGACAAGCCATT
GTACAAGAGAATGTTCAGCACCAAATAATTTGCGAACACTTTTATTAATTCATGATCACG
CTCTAATTTGTGCATTTGAAATGTACTCTAATTCTAATTTTATATTTTTAATGATATCTT
GAAAAGTAAATACGTTTTTAATATATACAAAATAATACAGTTTAATTTTCAAGTTTTTGA
TCATTTGTTCTCAGAAAGTTGAGTGGGACGGAGACAAAGAAACTTTAAAGAGAAATGCAA
AGTGGGAAGAAGTCAGTTGTTTACCGACCGCACTGTTATTCACAAATATTCCAATTTTGC
CTGCAGACCCCCGTCTACAAATTTTGGTTAGTTTGGTAAATGGTAAGGATATAGTAGAGC
CTTCTTGAAATGGGAAATATCTTCTTTTTCTGTATCCCGCTTCAAAAAGTGTCTAATGAG
TCAGTTATTTCTTTCTTACTCATCGCCCGTCACTTAAAAGAAGAAAAATTACTTTCATGA
TGCGAAGCGAAAAAAAATTTTTAGCTTCAATTTTCACAATGCATCTATGGAGAGGATATT
ATAAGATTACGAAATAAATTCTTGAGTGTTGTAAATTCTGTTAATCAAAGAAAAAGCAAT
AGCTCGTTTTTCTACAGAATGGCTAGCACAGCAAATATGATTTCTCAACTAAAGAAACTA
TCTATCGCGGAACCTGCGGTTGCCAAGGATTCTCATCCTGATGTAAATATCGTGGATTTG
ATGAGAAATTACATTTCACAAGAATTAAGCAAGATTTCCGGCGTAGACTCGTCTCTTATT
TTTCCAGCATTAGAATGGACAAATACTATGGAGAGAGGCGATTTGTTGATTCCTATCCCA
AGATTGAGAATCAAAGGTGCCAATCCAAAGGATTTGGCAGTCCAATGGGCTGAAAAATTT
CCATGTGGAGATTTCTTGGAGAAAGTTGAAGCGAATGGCCCGTTCATCCAGTTTTTCTTC
AACCCTCAATTTTTAGCAAAACTTGTCATCCCAGATATCTTAACCAGAAAGGAGGATTAT
GGTTCTTGCAAATTGGTTGAAAACAAGAAAGTTATTATTGAATTCTCCTCTCCCAACATT
GCCAAGCCATTTCATGCTGGTCATTTAAGATCCACTATTATTGGTGGCTTTTTGGCCAAC
CTTTATGAAAAATTAGGTTGGGAGGTTATCAGAATGAACTACCTGGGTGACTGGGGTAAA
CAATTTGGTCTTTTAGCTGTTGGTTTTGAAAGATACGGTAATGAAGAGGCTTTAGTTAAA
GATCCAATTCACCACCTGTTCGATGTTTACGTTCGTATCAACAAGGATATTGAGGAAGAA
GGTGACAGTATTCCATTAGAACAATCCACCAATGGAAAAGCTCGTGAATATTTCAAGAGA
ATGGAAGATGGTGACGAGGAAGCTTTAAAAATTTGGAAGAGATTCCGTGAATTTTCTATT
GAAAAATATATTGACACATATGCACGTTTGAACATCAAATATGATGTTTACTCTGGTGAA
TCTCAAGTTTCTAAAGAATCCATGCTCAAAGCTATCGACCTGTTCAAGGAAAAGGGCTTA
ACACATGAGGATAGGGGTGCAGTTTTGATCGATTTGACAAAATTTAACAAAAAGTTAGGA
AAGGCTATTGTTCAGAAATCGGACGGTACTACGTTATATCTAACTAGAGACGTTGGTGCA
GCTATGGGCCGTTATGAAAAGTATCATTTTGACAAGATGATTTACGTTATCGCTTCTCAA
CAAGATTTGCACGCTGCCCAATTCTTCGAAATTTTGAAGCAGATGGGCTTTGAGTGGGCT
AAAGATCTACAGCTTGTCAACTTTGGTATGGTCCAAGGTATGTCAACAAGAAAAGGTACT
GTTGTCTTCTTAGATAATATCTTGGAGGAAACTAAGGAAAAAATGCACGAAGTTATGAAA
AAGAATGAGAACAAATACGCGCAAATTGAGCATCCAGAAGAAGTTGCCGATTTAGTTGGT
ATCTCTGCCGTCATGATTCAAGATATGCAAGGTAAGCGTATCAACAACTACGAGTTTAAA
TGGGAAAGAATGCTTTCATTCGAAGGTGACACTGGTCCATACCTTCAATATGCTCACTCA
AGGTTAAGATCAGTTGAAAGAAATGCTTCTGGTATCACCCAAGACAAATGGATAAATGCC
GATTTTTCGTTATTAAAAGAACCTGCCGCAAAACTGTTGATTAGACTGCTAGGCCAATAC
CCCGATGTTTTGAGAAATGCAATCAAAACCCACGAGCCAACAACCGTGGTCACATATTTA
TTCAAATTGACTCACCAGGTTTCTTCTTGTTATGACGTCTTATGGGTTGCTGGTCAAACT
GAAGAATTAGCAACTGCCCGTCTGGCTCTATATGGTGCTGCAAGACAAGTTTTATACAAC
GGTATGCGCTTGTTAGGTTTAACTCCCGTAGAAAGAATGTAATAAACTTTTCCACCAAGC
CATTCTTCAAATGTGTTTTATTTCTATAATTGGATATAAATTGTATAAACGGATTATTTC
AATCCTTGCCATCTTTTTGTTAGGGGCCATTGTCCACATTTCATTAAATAGATCGAAAAA
AAAAAAGAAAACAAGATTCGTAAAGTAATCACGATTTTAACGTAGAAAAATACGGGTCAA
ACAGAACTTGAAAAACATCAACAAAAAGTAAGAAAAAAGTCTTCGTTGTTTCTATTGGAA
AAAGAATTAACTGTCATCTATCAACCAAGTTATCAAATTTAATGGAATCTGAAATATAAA
GATTGATAATGTGATAGGGTAATGAAAACCATATAAAACAAAAGGAGAAATAATCGTAAT
ATTATAATGTAGAAATACCGATTTTCTTTACAATGGAATCCCAACAATTATCTCAAAATT
CACCCAATTCTCAATTTGATAATTGTTGGGATTCCATTGTCGATAAAGGCTATAATATTA
GGTATACAGAATATACTAGAAATTCTCCTCGAGGATATAGGAATCCCAAAATGGAATCTA
TATTTCTATATACTAATATTACGATTATTCCTCATTCCGTTTTATATGTTTCATTATCCT
ATTACATTATCAATCCTTGCACTTCAGCTTCCCCTAACTTCGATGACAGCTTCTCATAAC
TTATGTCATCATCTAACACCGTATATGATAATATATTGATACTATAACTATTAGTTGACA
GACGATAGCGAATTTTTATTCCAACACTTCTTTCCATGATTTTATTCCTAATCAAGAAAA
TATAGATTTTCACCATAGTAATGATATAGAAAACTAGAAATGCTTTCACTTCAAAGTGTT
TCAGTCCCAGTGGCCGAGTGGTTAAGGCGATGCCCTGCTATTTCCTCAGAAAAGCAATTA
GGCATTGGGTTTTACCTGCGCAGGTTCGAATCCTGTCTGTGACGCACTTTATTTTTTTAC
ATCCACTATTTTAAAGCTTGATTTTTTTGATTGTGAGCCACCTTCATGTACCTATCGTTT
GTGGACTATTGCCATTAATTGCTTATTCACTTGCAATGATTTTATAAACATTACTCAAAC
TATCGGTTCCTACCGGAAGATATAACAAAAAAATTTGGCATATTTCTAAAGGTATCATTA
TGAACGGCTAAAATTTTTCAGCTTGCTACTGTTCTTGAATGATGCCTCTTTAAACATTAC
TGTGCATTAACACACAATAACAGTGACTTGTAACGGAAATATCGATATACTACAACAGTT
AATTATGGGTAAAGCTAAGAAAACAAGAAAGTTTGGCCTCGTAAAAAGAACTTTGAACAC
CAAGAAAGACCAAAGATTGAAGAAAAACCAGGAAAATATCAAAACTAAAGAAGACCCTGA
GCTAACCAGGAATATACCACAAGTATCAAGTGCACTTTTCTTTCAATACAATCAAGCTAT
AAAGCCACCTTATCAAGTACTGATAGATACCAATTTTATAAATTTTTCTATCCAGAAAAA
AGTCGATATTGTTAGAGGAATGATGGACTGTCTACTCGCAAAATGTAACCCGTTAATCAC
AGATTGTGTGATGGCAGAGTTAGAAAAATTGGGCCCCAAGTACCGTATCGCCTTGAAACT
GGCTCGAGATCCTAGAATAAAGAGACTAAGCTGTTCGCACAAGGGTACGTACGCGGATGA
CTGTTTAGTGCATCGAGTCTTACAACATAAGTGTTACATCGTAGCTACAAACGATGCCGG
CCTGAAACAAAGAATTAGAAAAATCCCTGGAATTCCTTTGATGAGCGTAGGCGGTCACGC
ATACGTCATTGAAAAATTGCCAGATGTCTTTTAAACTACTGTGTATTCACTCTTTAAGTA
TGTAGTGCAATGTTTTTGGTTTATATGTATATTAATTTCATAACAACAAGTTCATGGTTT
GCCCGTATTGGAGCATGTTTTCAGATGAACTGAAATGCCTAAGGATATTTCTATTTCTTT
TCAAGACCATTTACTCAATAATTGCTCTAAACAAACGCAAATGCAAGGAGAAAAAAGAGG
GCGTTTGAGACGCGACCAGTAACAGTTATAAACGGTAACCATTTGGCATCTTTTCATAAT
ATCACTGTCAGCTATTATCCTCTTCCATGGGTTCCACGCGATGCAGAATATTTCTTAAGG
AAGTTTTCATCTTCGCGCAAGCAAGGGACAAAACTTGATTGTATTTTTACATAAGCAAGT
ATATTTGATGCTGAAGAAGTATTATTATAAAAACTAAACATTGGAAAATACACATATAGC
ATACCTTAATATATACGGATAAAAAAAAGGTTGAAAAAATGGCTGGAATTTTGTCAAAGA
CTCTTTCAGAAGTGCATCCTTCCCTCCGAACAAATGGTATGGGTATCGGTAACACTCACA
GGAGGATATCGCTAGGCTTCCTACCTCCCAACAAGAAGAATCCTCTGGTACGAAAATTTC
GTGCAAGAACGAGAAATATTGATCAGAGGAGTTTCAGATCTTTAACAGATGATTTTGGAA
GTAACGTCCATGAACCAAATCCGTACTTAGGTAATATTGATGAGGAACCTGACCTTTACT
ATCATGATGAAGAAGATGGCGAACTGAGCAGAACGATTTCTCTACCATCAAGGGTATCAG
AAACTCCTGAGCTTTCGCCACAAGATGTTGATTGGATTCTACATGAACATGAACGACGAT
ACTCATCGGTATGCAACTCTGATAATGAGGAAGCAAGTCAAAGCAACACACCAGATAGAA
TACAAGAATATTCTGGAAGAGAACTAGAATATGACGAATTTATGAATAGACTCCAAGCTC
AGAAACAGAAATTAACTCGAAGTGCGGTAACAGACGCTAAAGGCACCTCACATCACAGAA
GACCATCATTCGTATCTGTGACTAGCCGAGGCTCAGTTCCCACAATTTACCAAGAGATCG
ACGAGAACGATTCTGAGGCACTAGCAGAATTGGCTCACAGCCACGTCACCTTCAAATCAG
AAGCAAGAGTTTTGGCATCTTATTCCTTCCCTCTAATTTTCACATTCTTATTGGAACAGA
TTTTCCCTATGGTATGTTCATTAACTGTGGGCCACTTAGGCAAAAATGAACTAGCAGCTG
TGTCCTTAGCATCCATGACTTCTAATATAACACTAGCGATATTCGAGGGTATTGCCACTA
GTCTAGATACTCTATGCCCTCAAGCGTATGGCTCTGGGAGATTCTACAGTGTAGGAGTTC
ACCTTCAACGTTGCATTGCTTTTTCATTGGTCATATATATACCTTTTGCTGTCATGTGGT
GGTATTCTGAACCTCTTTTTTCTTATATCATCCCTGAGAAAGAATTAATCAACCTAACGT
CACGATTTTTAAGAGTACTAATATTGGGAGCGCCAGCGTATATTTTTTTTGAAAATTTAA
AACGATTTTTACAAGCCCAAGGTATTTTCGATGCAGGCATCTACGTTTTGACAATATGTG
CTCCCTTAAACGTATTAGTCAGTTACACTCTCGTTTGGAACAAGTACATTGGTGTTGGAT
TTATTGGGGCTGCAATTGCCGTTGTGCTTAACTTCTGGCTAATGTTTTTCTTACTATTGT
TTTATGCATTGTATATTGATGGAAGAAAATGCTGGGGTGGATTCTCAAGGAAGGCTTTCA
CCCATTGGAATGATTTAGGGCATTTAGCCTTCTCAGGTATTATTATGTTGGAGGCGGAAG
AGCTGTCATATGAACTATTGACGTTATTTAGTGCATATTACGGTGTCAGTTATCTAGCAG
CTCAGTCGGCAGTATCTACTATGGCTGCATTGCTCTATATGATCCCATTTGCAATAGGTA
TATCTACCTCTACGAGAATTGCGAACTTCATTGGTGCAAAAAGAACCGATTTCGCGCACA
TCTCTTCTCAAGTTGGGTTGTCATTTTCGTTTATTGCGGGGTTCATCAATTGCTGCATAC
TAGTATTTGGACGTAATCTAATCGCCAACATTTACTCAAAAGATCCCGAAGTCATCAAAT
TAATTGCGCAAGTATTGCCCTTGGTGGGTATTGTGCAAAATTTCGACTCGCTTAATGCCG
TTGCTGGGTCTTGCCTCAGGGGTCAAGGCATGCAATCTCTAGGAAGTATAGTAAATTTAA
TGGCTTACTATCTATTTGGAATTCCCCTGGCTCTCATCCTAAGTTGGTTCTTTGACATGA
AATTGTATGGTCTTTGGATTGGTATTGGAAGTGCCATGCTTTTAATTGGGCTAGTTGAGG
CTTATTACGTATTATTTCCCGATTGGGACAAAATTATGACCTATGCTGAGATTTTGAAAG
AAACCGAAGATGATGAAGTAGATAGCGATGAGTATTTAACAGACTCAGACGATCCTGATG
AAAACACAGCCCTCTTAGGGGCTTAATTACAGAGGTATATCCGTATTTTCATTTCTTTAT
TTGATAGTACACGTGATTGTATACCCAATGCATATATTACTAAGAACTTTTTATAATGAT
GTAATTCAAAATGAAATAAATTACTGATTCATACGCGGTCAAAAAAAAAAAAAGAATATG
ACGGTTTCTTATTTACAAGCTTTTCTACATATGATTCAAATTATTCTAAAATGTAGCCCT
TTTTTGTTTTCTTATCTCCTTACGCTTTTGATTTGCCACTTTCTTAGAATCTCTTATCAA
TATTTTATCACCAAAAAATTCATAATCTTGCATGTAACGCCTGTCCATATTGAATTCATC
CGTTATGGCCGCATCATTCAATCCTAGTTTTTGAATAGTCCAGTAGTATTTTTCAGGATT
ATCTCTTTTCAAATATCTTAATATTGCCTGCCTTTGCTGGACTAATATCCTCAAATTTCT
GGTGTTAGCAAAATCCTTACGATGCTCTTTAATATGGTTTGCCATATTCTGGATACGAAC
AGTCATGCAAGCTGCTTGGACTTCACTGGAGCCAGTATCGCCTGGGAACCTCTCAAATTC
CTTACGTGCGAGTTCTACAGCCATTTTAATGGCATTTTTATTCTCGGAGTTCCTCATGCT
CAATATTCTCAAGATGGCTTCACGTCTGTCTTCCAGTTTTTCTATGTCTTCAATACCCAC
AACTTCTGTATTTAAACCTGACAACTCAGCTCTTTCACGCTTAGCAGACTCAATGGCTGC
AAGGAACTTGTCTACCTCTTCAATATTATAACCTTTCGATAGAACTAAAGGCTCTTTTAA
CTCTGCCATAATACGTGTTATAAAGGGAGTGTCCGCCCGGCCCAGAACTGGATCAACCTT
ATCGGTTGACGCTTTCAAAGTGGCTTGTTTGGCTTCATTTTTCTGTTTTCGTCTTTGAGC
CTTTAAGAATTTCACAGCTTTTGCACTATTGCTAACCGGAGAGGATACAAACGATCTTTT
GCCCATAAACAGAGGACATAGTGAAATTCTTAGATTCAGAATAGCATTCCTTCCAACAAT
CGACATTATGTATTATCTTCAAATACCTGAATGTGGTGTTAAGAGGCTTACCTGCGACTA
CCTAGTGCTAAATACCCTTATTGCAAGTTTTTAACCTTGACCGCTTTTCATTTTTCTTTT
CAAATCAATATTGCTTGCTCTATCACGGAAAACCGTGGAACGGCGAAATAAGAAAAGATC
AAACAAAGCTGGTTGAGCTCACGTATTACAGCTATGTTACCTGTTTTGCATAGCGGACTT
TCGTTAAAAGCTGAAATGCAATCAGCAATATATAGATACATATTGTGATCATAAAATCAA
ACCACAGCTTTGAAATATTACATATCTTAGAAGATCTATACCGAACCGTTTAGGAGATGT
ACTGGACGTAAGCGAGTTAGTCAATACAAGTCTGGGTAGAGTTGGTAAGTCCATTAACCC
TGAACTCATAACCTTCTTCTTAAACTTATTTAAATCTTTAACCTTGTCCATTTTCGTAAA
AACAACTTCAAAAGGAACTCCGTGTTCATGAATGTATTGAATGATCATATTATCTGTGTT
ATTTATCTCCTTATCTCCAGCGAGTAAGAGAAAGCATCTGACAAGTTGTTTTCTCTCCAG
GAGGTACTGCAAAGTGACTTTTCCTTGCTCTTTACTACTATTAAAGCCATAACCAGGCGA
ATCGATCATTCTGAGTCTATTTCCCACATTATAACAGTTGAGAGTTTTTGTGAATCCTGT
TGTTTTAGACACTCTTGCCAAACTTCCTAAATCTCTGCTTACATGCGAGGTGGTTATGTT
GTTCAAGATAGAGGACTTCCCCACATTAGTTCCTCCGAGAAAGATGACTTCTGGCAAAGT
ATCAATCAATGTAGTTCCACATTCCCCATGATCTTTCAATATGTCCTTATGAGATTTCTT
ATTCAGGAAGGGATTTTCTGGTATGTCATCAAAACTAGCTGCACACCATTCAAATTCCAC
TTTAGCCTTGTTGAAGAATCTGTTAACCTTATTTATATCAGAGTTAGATGGCTTTTCGTA
ATGTATGTTAAAAACATCGTTTAGTTTTAGCCAATTCGGAAGCCTTTCTTTTGGCCTACT
ATTAAGTTTCTTTTTAAGAGCTGTCTTGGGAACTTTTTTTTTAGCTTTTTCAACAGATAA
TTGCGTGGCTAGCGTTGTTCTTTTAGTGTTAGCAACAATGTTTTGTATAAAAGCCGCCGG
TGTATGCACGTACCTCTTACACAGTTGTTCCATTGCCAATGGTTTCCTATTTCGCTAAAA
TATTAGGGAATATGTGAAGAAAAAATCTTCAGAAATACCTTGTTCAGACCCACATTAAAA
CGCTTGATTATATGCATATTTACCGGCTGCCGACTTTCATTAAAAAAATTGCGAATACAG
AATTTTTTTTTTCACAATAATTACAATTTTTAGCACGATTCAGATGTCTATTTGCTTTCT
CTAATTTCATCTACACATCTACGTATATATGGCACCTTATTATCAGTTGTCATCAAAGAG
ATTACCCACAGCACCGTCTTCAATGTTCGGATCATCCAGCATGTCTCCGTTTTCTTTATT
CTTCTTAATTAATCTCTCATTTGCCTTCTTGAGGATAGTTTCCCTTTTCTCTTGTCTTTT
TCTCTCATCGCCTGCATGGTCCACATTACCATCTTCTTTCCCACTGGTGGATTTAACCCA
ATCTATAAAATCAATCATGAGTGCCCTTTGTGTTTTGTATTCGTCCACGCTCCTTAAATT
TCTGTATAACTCATCAATATTATAACCATTAGATATCTCAAAAAGGAACGCTCTAGCAGA
GGGATATTCTTTGCACAGAGTCAAAAAAATCACAGTGAAAACATATAGTGCCTCATGGAA
AGAATCCTTAAACGCACTATTACACAGCACATTTAGCAACAGATTTTTCATCACTTCAAA
TGTGAAATATTCATCCACCGTGTTGTTTTGATTAAGGACTGAGGTTAAGCAGCATTTCAT
TACTAGGATGGAGTTAAATGAACATTTTGTATCCTTGAAGGAAATTAAATGGTTCAAAAG
TTTCAAAAATGGAGCAAGGGTGTTTAAATCATTAAATATAATTTTTCTCATCTCCATTTG
ATGGTTATTTAGCCTGCTTTTAGCACTGTTTGGATTGGCATTGCCTTGACCAACACAATC
AATTACTATTCTAACAACAACTGTGGTTAGTTGTCTCAACAAATTCTCTTCCAAAATTTC
TTCAGTCATTTGATCATCGTCAGTTGGAACTGGGTTCATGTCCATATCATTCATATGCGA
GGACCATTTCTGACATAGCAGCAGGTCCAGGATTTCAAATAATTTAGGCAAAAATGCGGG
CATGAATTTCCCCAGACAATCTTTTGGACAACCTTTTAATATAGGACGAATGGCTATATT
CATTATGTGTTTCCATCCATGTGTTGAAACGCCAGGGCTTATCTCATTGCTACCTGGCTT
AAATATGGCAATAGAGTTCAGTAGTAAGTCGGGCGATTCGTCCAAAAGGTAAAAAACACT
ACCAAGTGATGATATGGCACTTAAAACAAGTAGAGTGTATTCCCTTGTATACCTAATGAT
GTGTCCTACGGAGTCGGCGAAGTCTCGTAAGGTTTGCATCGCTTTCATATGTTCATCAAT
AAACTCATCCTTTGATTTATTTGAAGCTCCGGCCTCCCAAAATCTTTCAATAGTGGAATA
CTTGACGAAGGATTGCACAACCGTAGGTAATCCTTTCCAATTATCTGGATCGTGGTAGGA
TTGCAATTGGTACAGTAGTCTCGTGATGTAAGGTAATATTGGGACAATCCTAGGTCTCCA
CAGATCTTGTAACATTTTGAATTCTTCATCTGTCTTTATACTTTGCATTGAATAATGAAT
GAACATTCTTGTTGCACGAACAGGAAACAAGCTTTGCCAACGTTTGGTCAATTCCGACTT
CAGCTCTTTACCCTCATCATCAATTGGAATTGATAAAAGGTCACTATTTTCGTCGATATC
ACGCCTCTGGAAATATTCTGCGATCTGAACAATACCTAAGCGTTCCATAAACCAATGCAA
ATCAGAAAGACCAACAACTGTTGTTTTATCAGACCAGGCTAAAAGTTCTGGATCCACAAT
AGCCGCAAATCTTTCCTCTTTCATATCTAATGAAGACTTCAATACAATGATCAATAAGAA
GGATTTGAAGGAAATTTTTTCATGGTAAGATAAGTTGGGCATGATTCTGGCAATGACACT
TTCAAGGTCTGGGTATATTTTTTTCAGAGATTCAGGCATTAATAAAGCCATCCTATTCAA
CTCGATACCACAAGCATATCTCAAATCTCTAACTGCGTCTGATTCAGCGCCTCTCTCTTC
CAAATTAATTTCTGGATAGTCCATCGTGGCGCTTGTTATGATTTTTTCTAAAAGTGTGAA
AAGCACATTATCTTTTAACATTGTCAAAAAAAGTGCGAAATTTTGGATTTGTTTCTTCAA
TAACAATGGTTCTCTTAAATTTAATGCAATTAACTGGTTTGACAAAATTTCCAGTTTTTG
TAATATGGAATCTAGTTTTTCGTCATAATCATCTCCTGTTGGATACCAGATCTTCCATCT
TATACAACCATTGATGAAACATTCAACAATCATGTATTGGGAGAGGGCACCTAAATAAGG
CTCTAATTTATGGTCCAAAAATGTGGAACTTAAGACCTGCTGACCAAATGGAGAGCTGAA
ATAATTGTTTAATCTGTTGTTCAACCAATCATAAGTAAGGTCTAATTCGACGCAAGAAAT
CAACCTAATGATGTCTCTTATTCTTTTCCTATAAGTGGAACAAAATGTTTGAAATTCGGA
CTTGGATTGAAAATCAATCTCCGCAAATTTTTTGGAAATATGACCATCAATCTGTTCATA
ATAGACTAAAGCATCCGCGGCAAACTGTAGTAGATCAGGAATGACATATTTCTCCAGCTT
GGGTAAGTATTCATCGTTTCGAAGACAGGTACACCATAGGTCTAATGTTAATCCGCTAAC
GATTAAGCTTGGGTTATAAGTTGTCTTTAATACAAGCTTAAAATATTTTTGAATCTGGCC
ATTTGTCTCCTTAATCTTTGGGACACAAACATAGAGACAACTGATCATATCCACGAACTT
TTTAATTATAGGATATTTCGTTTCATCTATATCATCTGTAGGATCAAACAACAAGCTTTC
ATAAACGCTATCTAATAAGTCCATATTATCAAAAACTCGATCTATGGTCATTTGGTAATG
GCTTTCATTACTATAGGGACGGGTCAACAGGATATGTATCGAGTCTAATGCCATTGACTG
CGCCCTTGGGATATTGCTGGATAAACAAGTCAATAAGGAGGATAACACGTCATTTCTTAC
AATGACCTCTGTTAATGGCCAGTTTAAACACGTCTTCAGAGTTTCTAAAAGCCTTATGAT
GTATTCAGAATTATTCTGTTGTAATGCATTATTCAACTCTGGAATCCAAACAGAAAACCA
GCCCTCTTCATTAGCTTTAAATTTGGTCCATTTATCACTGAATTTGTATTTTATTGCGAA
AACTTCAATAGGGCAAACAATCATTACACATAAGGGTTGGATAACCGTCATCCTCTTCAA
AACAATTAGGTCGTCCAACAAGAAAACATCTTCAAAAAGGATTCTGAAAATTATTAATGC
TAGTTCTCTTGACGATTGATTTATGTTCCAAAGTTCGAAAAGGTTATTGTCCATGTCCAC
CCAAGATGTGAGTAACTGTTCTTCCGTAGGGTTTGTCTGCTTAAGAGCCTCACCCCATGT
TCTTTTTGCCACCTCTACCCATAAAGTGGCTAATTTTTCCTTAATATATCTGGTATCATA
ATCTTGCACCCCAAAATTAAGTTCCATGACCCATTTTCTCAGGGCCACTCTTTTCCCCTC
GTCATAATCATTCCAGTTTTTCTTCACTGCATGGTCTAGTAATCCTAGTCCAAAGTATTT
CAATATAGAATTAGTGGGGTTTTGCAATGCAATTTCGTAGCCCCAAAAGGGCGATTCTGA
ACATAATTTCACTTCATCTAAAAATTTCTGAGCTTCTTGTCGTTGAGAATTGTTAGACTT
GGGGGAGTAAATAACATCTAGTGCGCTAACAATCTGAGAAGCGCCTGTGGAATCCATTAC
TTTTCTTCCAATCAACGTTAGAAAAAAAATTTCAAATTCTAAAAATTCAAAAAGTGATTA
AAAGGAAGAAAACAAAATATACTATAAATAATTTCAATAGTTTGTCACAGTAACAATTTC
TACACGAATGTAAAGAGTGAATATGGTTTTTAATGGCTAATGCAATGACACCTTACGTTC
TCGCCTTGTTTATTTTTCTGTTTTGCTCTTCTTCCGATCTACAAAACTTGAACGGTTGCA
ACAAATAGGGGGATCTAATCAGGGTGTACTTAAAAGAACGGCTCTTCTACAGGCTCAACG
AATAAAGATAGGCTAAAAACACACACGCTCGTCACTCCAGCACCTCTGTTCAATGGAATC
TTGCTCTTAAAACTCTTTGACAAATATTACTACATCGAAAGCTTAGTACTCTTGAAGTCT
CTTTGGAAAAACCAACCTTGATCGCGCAGCAATGTGGCAATGCCCCTCCGCTGTGGCGCG
CCGCCATCACCCGGTAAATAGAAATTGGTGACCAAGGAACAATGCCATGGTGAGTACATT
ACCATAAAAACCAAGAGGCGATAGTGTTGTCGGAAATAATAATACAATTTGTTGATTCAT
TATGGCTATATATCATTAAAATATTCACAATAGGTATATAGTCCGATTTGGACAACTAAG
GCAGCGGTGAAGAGTAGAACCTGGTCCTTCAATAATAATAACCGTTGGCAATAAACCTGA
TCATGTACTCGTCAACATGGGCAGTGCCCTCATACTCATCAAGTTCAGCATGATTTTCTT
CCTCTTCATTAGCTGCTTTTTTTTCTGTGCTTTCGTCGAAATCGTCATTGTCAATTTCGA
CTTCTCTCATGGCTAAGTTTGCAGCTTTAACATCATCCTCATCTTCCGCTTGCGCAAGAA
GTCTTTCCAGTTGTCTGTGATCTTTGGCTGCCACATCTGCATCTGCTATTAGTGGTTTAT
CTCCACCTGAAGCATTTTCGGGCAATTCGGATCCCAATAGATCTCTCACCGAAAGTTTGC
TGAAATAATCTGTTGTGAAGTCACCCTCTTGAATAACAACATTATCCAATTGTCTTTTTT
GGTTGGCTTTTTTTAAGATATTGCTTTCTATGGTATGTTCGCTGACAAATCTGTAAATAT
GCACATCTCGAGTCTGTCCAATTCTGTGACATCTATCTTGACACTGTTTGTCCATGGCTG
GATTCCAATCTGAATCGTAAAAAATAACTGTATCTGCCCCAGTCAGATTGATACCTAGCC
CTCCTGATCTACTTGATAGGATAAATACCGTTATTCTTGAGTCAGTGTTGAATCTCTCTG
TTAGGATTTGACGGTCTTCGATCTTTGTGGCACCATCTAGTCTCATATACAAATAACCAT
GATAGTTTAAAAACTGTTCCAGAACGTCCAAAACTTTTGTCATTTGTGTGAAGATAAGTG
CCCTATGTCCATTGTCCTTCAGCTGCTGTAATAAAATTGCTAACTTCTGCAATTTACCAC
AATCGTATTGAAGCAGCGATTTGTCCGGGAATGCGATTGTTAATTTGGTTTGCAGTTGGT
GTAATGGGTTGGATACTTCAAAACAGTTCTGCATTACCTTTAGCCTTGTGTTTTCGCCTA
CCGAACTGTCATCATTTAATCCAAATGCCAACTTTCTCATATCTAGTGAGACGGCACTTG
GGGTTAACACTGCAAAGGTATCTATGATCTTTCTATTATCCAATACCCTGGTTTGCAAGG
GTTTTATTAGTTCATTATCAATAATGCTTGATTTATCATATTTAACCCTTCTATCTTTCG
TTAATAGGTCAATAAGGTTCTTTCCGAATATGGGTCTTCTGTCGCATCTAAGTTTATTTA
CCATCTTTAGAAAGTTTAGCATGTCAACTGTCCCTTCAAGTTTCTGCTTATTAGAATACT
TGAAATATTGATTTGCATTTTGAAAATTTAAAAAAGACGCCTCTCCAAACTCCTCCTGAA
GCTGTTTATTGGTTTCCCTCAATTTATTGACTTCTTCAACGAAGTTTTTTACACACGTCA
GTTTTGAGATTTCCTCGGCATGATAAGAAGTTAAATCTTTGTCATTAAGCGTAAACACCA
AGTTCAAGAAATCCAAGTCAACCCGGTTAACTTGATTGTTTTTTTTGAACAATTTAAGCA
CAGTCCTTTCTACATCCGTGTAGTCGGAAGCTACACAATGTTCAAGGACAAATGATGTTA
ATATTGGCCTCACTTCAAATAAATTGGGATGGTTACACACCTTTCTCAATTGCATCAAAC
AGTTGACAATTGACATAAAATTTCCACTGGCTAGTGTTGCTTTCGTTTGAGCTCTAGACA
TAAAATCATCATATAAGAACCTTTGTCTTTTAGATAGCTTACAATAAACAATATGCTCAT
ACTTCGCTGGCATTTGTTTCTCAACATCGGCCTTTAACCTTCTTAAGAGGTATGGACGTA
AAACTTGATGCAACTTGGCAACTGTCTTCTTCGTTTCCTTGTCCTGTCCAAAATTCTGAC
CCGTTTCAATAATTTTATCGACAGGGCGTCCAAACCATTGTTGAAATGCATCAAGATCAG
CAAATCCAGAAACCTTTTTCCCGTCAATAACAGTCTGGGGCATTAAGAAATATAATAATG
ACCACAGCTCAGCAAGGTTATTCTGTAAAGGTGTACCAGTCAACAGAAGCCTTCTTTGTG
TGTTGAAATTCAATAGAGCCTGCCATCTTGTAGATCTGAAGTTTTTGATATTGTGTGCTT
CATCCAGCACCATATATTGCCATCTCTTTCTCTTAAAGGAATGTTGATCTTGAACTACAA
GTTGGTAAGAAACAATACAAACATGGAAAGCATCAGGCTTATTCCAACCTTTCCTTTTTT
CTTTACGTTGCTGGGGAGAACCATAATATGTTAAAACCTTAAACCCAGGCGCGAACCTTT
TGAATTCCATCTCCCAGTTCAACAGAACTGATGTAGGAACAACAATAAGATGTGGCCCCC
AGTTTTCCTTTTCACAAGCTAAATATGCTAGCAGAGAAATTGTCTGAATAGTTTTACCTA
ACCCCATCTCGTCTGCCAGGATACCATTTGTGTGATTGTTATAAAGAGAGGCTAACCAAT
TCAAACCTTGTTTCTGGTACGTTCTTAAGTTTCCTCTTAATAAAGATGGCACAGGTACAT
CCACCACTGATAACTGTTCTTCTTGTACTTTTGTTTCAGCATCTTCCTCGACATCTTTTA
TATCGTCCCTATTTTCATTTTGAGTGTGAACAAAATCACCTGCTCTTTCAAATGTAGCAG
CTGAATTGTCAACTTGGTCTTTTTCAAGTTCTTCACCTTCTACAGATGAGCTATTAACCG
TAAAATCTTCACTATCGTCAAGGTCTAAATCCCCATCCGATTCTTCACCTTTACCAAATA
ATGCACTTAAACCCACAGATGGAGTCTTGTCGTCCGATTCTCGATCATTTTCGTTTTGAC
TTTCATTTTCAGAGGATGAATATATGGAGGACTCCTCTCCAGTCATTACAGAACTTTCAC
TACTTGAACTTTCATGTTTATCCAATGTCGGAAACTTCTCATCTTTATTTCTTGAGTCAT
ATACTGTCGATGAACCATTAAAATGCTCGTATTTTTCTTTCAATTGTATCAGATTTAATG
ATTCGTCTGTTGGAGTAGCTTCCGTCGATGCTGGACTATTTTCTAGCCCCACATCAGCAT
CGACCTCTTCGTCTTCATCGGAAGATGTTGATAATTCGTCATCCATATCATCGTCACTTT
CACTCAATACATCGTTTGAGTCAGAAGACGGGGTACTGCTTCTCCCATCGTCATTTACTT
GGTTTAGCTGAGCTTCCAACAATTGCGTACTTTTCTCCAACATTTTAGAAAGGTGTTGCT
TACCTTCAATCCTTTTTAACTGTTCTTCTTCATCTTTTCTCAAAATCCTATAAGCCTTCT
CAGCCATATTCCATCTTTTTTTAACAGCTTGAACTGCGAACCTGGCTAGCGACTTTTTGT
GCCTCTCCTCCTCCTTTGCCTTTCTTTCTTCTGCTCCGGCTACGTGTTTAAAATGTTGTT
CTATCATTTGAGAAACCTTTTTGGCTCTTGCTATTCTTGCCTTTGTTGAACTTCTAAACA
GCTTACTCATATGAATACCTTGGTTAATTAAGTGATCGGTATGGATTTGCAGATCTTGTT
GTTTATAGAAATATGAAATCGGGTCTGGTTTATATGTTATGATAGTCTTGATTTCCTTGG
ATGTTATAGGTTGTAGTGAGTCCGTTTCTTTGTCATACTTCAATGCGCCATTTTCAATAC
CTTTTTTGAGTCTCGATAAAAGCCGTCTTTGTTCGTCGATGTATTTATTATATTCTTCCA
GCGTTAAATCGTCTTCTAATGACTTAAAGGAAGCGATGTATTCGTGCAAGCTTTCGTATC
CCGGCTTGACTACATGCAACGGGTTCGTTATGGTTTGCTTTGGAGGATGGACTACCAGTT
TTATTCTAGGCTTCTTTTTCTTTCTACCTCTTTTTTTCTTTATATCTTCCTCTTCGGATG
ATGTGGTGAAATAAAAATTATCACTATAATGTTCACTAGTATTTTCAAAGGAGCTATCAT
CAGAAGGACACTTTATAGTGAAGGCTTCAGAGGGTTCTTCAACTTTTGCGATGTGATCAT
ATCTCTCTTCAGCTATATGTTCATGCAATGGCAGTGGATTTTCCTTTCTTTCACTTTTGA
ACTTCAAGGACTTCGCTGCTTCTCTCTTCTTCAAATGTTGTATTGGTCTTTTTTGCGGTA
CTATAGATTTCCTATTTGAATGATCACTTAGTTTGTATTTTAGCTCCTCACATTTATTTC
GTACTAATGGTGCTATGCTTTCTAACTTCAGTTCTATATCACCCTTTTTCTCATTAGTCG
TTTCTGAACTAACAACTGTCGATGTCCTGAGGTTTCGCCTTCTGCGAGTAAGATCACCAT
TCGTGCCTTTCTTGGCTACGTCATCAGTGAATTTTTCTCCTCTCTCCTCTAACGACAAGT
GTGTTTCCCTGAGAAACTTCTGAAAACTTTCAGAATCATTAAAATGGGTTGGATCATAAT
CTACCAATGAAACAAACTCTCTTAAATGGAACAGTTCATTCGTCAGAAGATCATACCTAA
ACTTCAAATCCGCCAGATCCTGTTCACCACCAGCCTTTTTGTCTTTCGCATGCGATTTAC
GAGATGTGGTCATATATTCTTGTAATGCAATAACTTGGAAAATGCAAAGAGCAGTTAGAA
TTCATAAATTTTCAGCTTAAGGAAATATTTTCTAAGAGTTAAAATGGTATTGTTGAATAC
CTCTCAAATGCAGTAATCGAATGCTTTGGGTCTTATCTAGTTTAAAGCTCAAAATCTATC
CTTTTTGCACGTAAACACTTTAGAATCCCGCTATCCCTTTGCACTCTTTCTTCAAGTCTC
CTCTTTTTTTTTTTTCTCGTAAGTTGTCGCGAAACGCCACCGAAAAATCTTAAGGAAATA
ATATTAAAAACTGAAAAAAAAAAAATTGAGAAAGTATTACCCTCCCTTAATAATCGTATA
AAGGTATAAACGGGTAACATTATGCGAGCAATATGTTCACTACTGCATCAACGTATAGTG
AAAAATGTCCATAGGTAGTACATACAGTCCACCAGTTGAAGGTTAACATACAGGTCGTTG
AATCATCTAAATATATTTGTAAAGTACTCGAACATGAGCTCTAGAGCATTAAGGAGATTA
CAAGATGATAATGCTCTGCTAGAGTCGCTGCTATCGAATTCAAATGCGAATAAAATGACG
AGTGGTAAAAGTACTGCCGGTAATATTCAGAAACGGGAGAACATCTTCTCTATGATGAAT
AACGTACGTGATTCAGATAATAGCACTGATGAAGGACAAATGTCTGAGCAGGATGAAGAA
GCTGCTGCTGCTGGGGAGCGTGATACTCAAAGTAATGGTCAACCTAAAAGAATTACACTA
GCATCCAAGTCTTCTAGAAGGAAAAAGAATAAAAAGGCAAAAAGGAAGCAAAAAAACCAT
ACCGCCGAGGCTGCAAAAGACAAGGGTTCCGATGATGATGATGATGATGAAGAATTCGAC
AAGATTATCCAACAGTTCAAAAAAACTGATATATTGAAGTACGGTAAGACTAAAAATGAT
GACACTAATGAGGAAGGTTTCTTCACGGCATCTGAACCAGAGGAAGCATCTAGCCAACCT
TGGAAGTCATTTTTAAGCTTAGAAAGTGATCCGGGCTTCACAAAGTTCCCCATTTCATGT
TTGAGGCATTCTTGCAAATTTTTTCAAAATGATTTCAAGAAATTGGACCCCCATACGGAA
TTCAAACTTTTATTTGACGATATATCTCCAGAGTCTCTTGAAGATATTGATTCGATGACA
TCCACACCTGTCTCCCCTCAGCAGCTGAAACAGATTCAGAGACTGAAAAGATTAATTAGA
AACTGGGGCGGAAAAGATCATAGATTGGCACCTAATGGCCCCGGAATGCACCCGCAACAT
TTGAAGTTTACCAAGATCAGAGATGATTGGATCCCAACTCAAAGAGGTGAGCTCTCTATG
AAACTTTTAAGTTCTGATGATCTTTTAGATTGGCAATTATGGGAAAGGCCGTTAGATTGG
AAGGATGTTATCCAAAACGATGTCAGTCAGTGGCAAAAATTCATTTCTTTTTATAAGTTC
GAACCTTTAAATTCCGACCTGAGCAAGAAATCAATGATGGACTTCTACTTAAGTGTTATT
GTTCACCCTGATCATGAAGCCCTTATAAATTTGATTTCTTCTAAATTTCCGTATCATGTG
CCTGGACTGCTACAAGTTGCTTTGATATTTATTAGGCAAGGTGATAGATCAAACACTAAT
GGATTGTTACAAAGAGCACTCTTTGTCTTTGATAGAGCTTTGAAAGCAAATATTATTTTC
GATTCCTTGAATTGTCAACTACCTTATATATACTTCTTCAACAGACAGTTTTACTTGGCA
ATATTTAGATACATCCAATCTCTTGCTCAAAGAGGTGTTATAGGAACTGCTAGTGAATGG
ACAAAAGTTCTCTGGTCACTGAGCCCATTGGAAGATCCTTTAGGATGCAGGTATTTCCTC
GATCACTATTTTCTATTGAATAATGACTATCAGTACATTATAGAATTATCCAACTCTCCA
TTAATGAACTGTTATAAACAGTGGAATACTTTAGGATTTTCCTTGGCGGTAGTACTAAGC
TTCCTAAGAATAAATGAGATGAGTTCCGCCCGCAATGCGCTTCTAAAAGCCTTTAAGCAT
CATCCTTTACAACTGTCAGAACTTTTCAAGGAGAAACTCTTGGGCGATCATGCGCTAACT
AAAGATTTATCCATTGATGGCCATTCGGCAGAAAACTTGGAATTAAAGGCATATATGGCC
CGCTTCCCGTTACTTTGGAATAGAAACGAAGAGGTAACATTTTTGCATGATGAAATGTCG
AGTATTTTACAGGATTACCATAGAGGAAACGTTACAATCGATTCAAATGATGGGCAAGAT
CACAATAACATTAACAACTTGCAATCACCTTTCTTTATTGCGGGAATCCCAATTAACTTA
TTAAGATTCGCCATACTATCTGAGGAGTCTTCTGTAATGGCTGCAATTCCATCATTTATC
TGGTCTGATAATGAAGTATATGAGTTTGACGTATTACCACCAATGCCTACGTCAAAAGAA
TCAATCGAAGTGGTTGAAAACATCAAAACCTTTATTAATGAAAAGGATTTAGCTGTCCTT
CAGGCAGAAAGAATGCAAGATGAGGACCTGTTGAATCAAATTAGACAAATATCTTTGCAA
CAGTACATTCATGAAAATGAAGAGTCAAATGAAAATGAGGGTTAATAAGAAATGTTGCAG
CTCATTTTCTAGTACGCAGAGTAAGGCTAAAGCACTTATTTGAATTTAACGTTATTCATT
GCATAGTTCAGAAAGGGTGTGATCCAAAAGAAAATGCATATACGAGTGGTCCGACGTTTA
CATATGTACTAGTGACTGTATATTAATATATGCACATTTATGTAGCTACGGATTTCACTT
TATAAAAGATCTTCTTTTTTGATATTCTAATATTCGTAACAATGATTTCAACGGGTAGAC
AGGTGCCAAACTGCTGGCAAAGATTAAGTTGGAAGCATCTCCTTTCGTCATCTTAGTATT
TACATAAGTAGTAACATCATCCAAAGATAATCTAATAAAATCTTTTGAGGACTCACCATA
TACTTTCTTTAGCTTTCTGAAAACAAAGTCTCTTTGTTTTGACGTAGGAACTGTTTGTCT
CCATTTCGAGTATTTACTAGATATTGCCTGGTATTGCATTGTTTGTCCTTCCAAGTCCGA
ATTTAGAGTATTTATGATTTTTTCCACCTTTGACATTACATTCCAAAGATTAGCGTCTTT
TATTATACTTTTTGGAACATAGTCCGCGTATTTATTTGTTATAAAACACGGTAATTGTCG
ATACATTTTTAGATGATATACCATCGACAATTTGTCTTCGGATTTTTCTTTGTATATTCT
CAAATGATTCTTACCTTTTAAAGGGAGGCCCCACGCATTTGAGGCAAATTTCACCCACGG
ATATTGTGAGTTCATCAACAGCTCCATTTCTTTTACAGCTTCAGAAGCTTCATCAAACTC
CTTGCCAGATGGATATGAGTTATTGCTCTGTGTAAAATTCCTAAAACTATCAAAGGAGCA
CAAGGTTAAATCAACCGAATTTGCACTGTGAATCCAATCGGCAACGCTATTTCTTTCAGT
TACATTTTCCATTGCTGCTTCATCAGTCTGAAATAAAGCCCTTAACCTTTCGTCGATTTT
TTGTTGTTTAGCTATTATCTCTCCTTGGATTGCTTTTAAATCTTCAACTGTAGCATCATC
AAATTCGATATCATCACTCCTTATACCCAGTAGAGTGGGCGCTGAAACCACTCCAACACT
AGAAGCTCCAATGAAGTCGATGATATGACAGTGGTCTTTCGAATGGTGTAACCGTAAACC
TCTTCCAATCATTTGAATCAAAAGTGAACGCGATTTTGTGGGCCTACACAGTAGTATACA
ATCAATATTTGGCATGTCCGTTCCTTCTGTGAATATTCCACAGTTCATGAGTACTTCAGT
TTCCCCATTTTTGAATTTTTGAATTATATTATCTCGCTCTATCTGTTTTGTATCCGAGGT
GACATAGTCCGTATTAATACCGTTGTCTTTAAATAATTTATGCAAACTTTGTACATGGGC
TTTATCAACGCCAAACAGTAATGTTGATTTTAGTGATTTCTCTTGCTTTTTATGAAGGTA
AGTTTTCAGAATTACTTCATTAATTTCTTTCGTATTCATTAGAGACGATAACGGTGCCAG
CTGGAAGTCATCTGCAGTGCTTTTTACATCTGATAAGTCTGCTTCAATTTTGACTGACGT
GAATTTTGCCTCACATAGCCACTTGTCATCGATCATTTCCAGTATTCCCCGGTGGTACAC
AATTTTATCCATTACCATTGACAAAGCTCTTTTATCTGCTCTTTCGAAAGTCGCACTAAA
GCCAATAACAGGGATTTTGGTTTCTGCAGTTGAAGCTTTGAAATGATCTAAGATACTTCT
ATAAGAATTAGCCACAGAATGATGTGCTTCATCAATGATGATGAGATTCACTGAATTAGT
ATCATATTTATGGAGTCTTCTAATCAACGTCTGAACAGATGCAACAATCACGTCAGAATC
TTCAATATCGCAATCATATTTTCCCATTTCTATGTGAACCTTTAAGTCGGGGAATATTTT
TTTAAGAGTGGCCGTCGCTTGTAAGGCCAGCTCCCTCCTGTGAACCAGGATCAACGATTT
AAAATTTCCTTGACATTCTTTAAAATAGTTTTGGCGCAATTGATTGATAAGATTTGAGAA
TATCACTGTCTTACCACCACCAGTGGCTAATGATACACCAATTCTCTTGGTGCCCTGTCG
AATAGAATTCACACATGCATCTATAGCATCTTGTTGGTAATCTCTGAGTACGGGAGCTGA
GTAACAACGTTTTATAATTTTGATGCGCTGCAGTATTAATGAAATAGAATATGTCGAGAG
TCTAGTGGCTAGTGTTGAGGTCATATTTTATTATACTCATGGCTCCAATAGGCTTCTTCC
GTTATGTGAAATAAAACTCTATAGTTTGACATTATGAAAAAGTTGTATATGTAATCTATT
CTACCAAAATAAAAAAAAAAAATAAATATATATAAAGATGTAAAATATGCTTATACGAAA
AAAAATGGATAAAAGTGTTTTAATTAGTGTACAGGTCATAGGTTGCTTTAGCAGTGTTTC
CTCTCAGCATGAACCACAGAATAGTTACTATAAGCGCCAGTATTATGGTAGCTGATTGTT
TGAAGGAGGTGAAGAAACATTCGTTGGAATCTATATCAACATTCAATACACTAGTAGACT
TGATGTCTTTGATTTTTTTTTCAATCTTGGAGGATTGATTGTTTTTGCGGTAAGTCTCCA
AGGCCAAATCCAGCACATTATTGTTAAGCTCATACTGAGCAGTATCGATATGATCTTTGT
AATGATGATAATGACTTACGGAAAGAGGTTTTGAATCATCAGGAATTACGTTTTGCACAT
TCGCAAAAAAATCAGTAATCAATACTTCTGACGGATTCCTATCAAACAGATCAGTCCTGA
CACCCACATGAGAGTGAATCTTTTCGAAGGTGAATGAATCGAAGAGGTCCTGCAAAGTTA
ACGTGGAATTTTTATCGATTTGTTCTAGGAAATCCAAACAGTAATAGGTGAATCTATCAA
TAACAGCAACCCCTATTTCTACGTCCGAGTGATGCGAGTACGAGCTTTCATCCATTTCAC
TAGAGCCTACAGCCAGAATATTTGGAGAATAAAACTTGGAATACATTGTGTTTGCCTGAC
ATGTATCTATCATAAAGAAGATTTCATTGTATCTTTTCTTTTCGTACATTTGCTGGAATG
CATCTGCAATATCTTCAGAAGCAATCTCTTCAGCATCTTGGAACTTTAAAAAATCATCGC
CACCATGTCCTGTCATATAGATGAATATATTTGAATTTTCATCCGTCAACAACCGTTTAG
ATTTAGGATGGTCTTCTGTCCATCTATCCGTTAACAGCCTTATAAAGTTTTCCACGGTAA
CTTCGTAACCTCTGTAGTCAACCTCTACAGAGTCTCCGTAAAGGTCAATAGCGTGATCCT
TATTGTTAAAAACACTTCCAGGAAATAGATTCCTTGAATTGCAGGCCACATCATCACTCA
GCATCAATATTATTTGTGAATCCGGTATACCTAACCTCTTTACAGTCCTATACATACTAA
GGACATTAGCCATGTGCCTGTAATTGAACCAGAACCGCGACGTGGATACTAATACGGCCC
AATTATTTGTGTTCGTTGCTATAACTTCGTGTGCAGCATCTGTGTTATTTGCACCTGAAA
GGGGTAGTAAGAATATGTATAAAAGCAACAGCGGCAGATGCATCGCTATACGCATTTTGT
TCGGCTTTTGCAATTTGCTATGCTTAAATGTGATATATATTTTGTATTTACACCTATGAA
CTATTCCTTTACGTCTTTGTATGCGTTTTTTCTTATGTTTGGCGTGCTAATGGGAAAAAA
ATAAAAATACAATATCCGGGTATTTCCGTCGTGTTATAAGTGCTTACATACCTAATTACA
TCTAGGTACCTGCCACCATACAATTTGTTTATTCTATTTCAGGGTCAAGCTTCTCAAGTA
GTAAAGAACTATTTTTTAAGCCGGCGTCCGCTATGGTCATGTTTAATTTATCAATCAAGT
CCTCTCTTTGGTGATCATTTAGTGTGAATCTTGAATCGGCAAAACCATCCATTTCTGTCT
TGATAACCTCGTAAATAGTACGCACAGTGTCTTCCAGAGCATTGAATCTACGAACTAGTC
TGGAGCCATCACCGGTACGAATTTGAATTCTTGTAGTGATCCCTGGTTTATTTGGCGGTT
CTGGATGCACCCTGGCTTCAATGGTACTGAATGGATCCGGTTCTTGTACTCGTTTCTGTT
CTTCGCCAGTACTCGGCACTTCTTCTTGGTTTGATTTGCTCGAGTTATTATTTAATGACT
CTTTAATGGCTAATTCCATTTGTTGCTCTTCGGTCAAAGTTGTTGGATCCACTTTAGGAA
GAGGTTCATTAACCGTGGGATTAGGGACCTTTGGATCTAGCGAAAATGAGGCCAAAAACT
CGTTGATTTCTGAGATGAATTGCTCCGGAATGGGAACAACCCTATTCCATTGCTTGACAC
GTTCACCGGTAATTGGATCCAGTATCGCGATATGGGGCAAATCATCCTTATTATTCAAGT
GATAGAACTGAAGATAGGGTTGGGCATTACGTGATTCATATTGATACTGTAGGAAAACGA
AGTTCTCTTTGATTATAGTTTTTACCGGTCTGGACGACCACAAATCCCTGTTGAGGGCTT
GGCATTGGAAGATTCCTGAATCCTGAATGTTAATCATTATCCATTTTTGCTTTGCCCTTG
CCTTTTGCTTTGCAGCGTCTAAGTCGAGTTTGGACATGATTGAAAATGGAGGCCTAAATA
ACAAAGCTAATTTCTGCTCCTTGGAAATGGTTTTAGGCTTTCTCACTAATTTGGTGTACT
CCTTGATATTGCCGTCTTCATCAAGTTCGATGACCGGCTCTTCCACATACTCATATTCGT
CGTCGTCATTTTCTTCCTCGGAGTCCAAGGAATCTGAAGAGTTGTCATTGATGTATGTAT
TAGTATTTGTGTCATCCAATTGTTGATTAAAAATGCTTTCAGGTCTTCCTTCGTCAAACA
TGTCGTTCACCCTATGCAATGGTTCAAATCTTCCGCCAATGCCGCCGTAAGAAATTGGGA
ATCCTGAAGTTTCAGTAAGTACTTCATGTCTTGCCTCATCAGGTGGCCTGACATAATCTT
GGTCAGGTTGTTGTTGTTGGTAAGCTTCCCTTTGTAACCTCTCCGCTAATTGTGCATCGG
CATCTGAATCTACAGAGGTGGGTGCCATAGGAGTCGAATTAGACGGAGTAGGTGTGTTGT
TACTGCTCAGTAAAGCAGCCCCACCATTTTCGAAAAACAATGATATGGCTGTGTTCAAGT
TCCCGTCTGCCATTTCGATGAATTGAGTGGCAATGGCAGCGTCATCAGCGCCAGTGATGG
CCATAAATTCGTCTACTTTTCCCTCTGACATATAAAAGGTATGTTATTATTGCCACACGT
CGTAGTCTATGCGTTTTTAGTGACACTATTGAGCGATCATAGCTAAGATGTCGTTAACAA
GTAGTAGAGTTTGCGTGAATGTATGAATATTTCCCTTTTTCCTTAAAAATTCCTTGCATT
TTGGTAATCGTGTGTAATGATAAGGGCGTTATTCGACTTATATGAGCATGGGGTATATTA
TTGAGGTAGTTAATACTAGTCATCGTAAAAGCAGAAGCACGAAACAAGGAGGCAAACCAC
TAAAAGGATGGCCCCAAATCAAAGATCACGTTCGCTTCTGCAGAGACATCGAGGAAAGCT
ACTCATTTCATTGACTGGAATAGCTGCTTTATTTACCACAGGGTCGGTGGTAGTGTTTTT
CGTGAAGAGATGGTTGTATAAACAGCAGTTACGGATTACTGAGCAACACTTCATCAAAGA
ACAGATCAAAAGAAGGTTCGAGCAGACACAGGAAGACTCGTTGTACACAATATACGAGCT
ACTTCCTGTATGGAGAATGGTTTTGAATGAAAACGATTTGAATTTGGACAGCATCGTTAC
CCAATTAAAGGACCAAAAGAACCAGTTGACTAGAGCAAAGTCTAGTGAAAGCAGAGAAAG
TTCGCCGTTAAAAAGTAAAGCTGAGTTGTGGAACGAGTTAGAACTAAAGAGTTTGATCAA
GCTGGTGACAGTGACGTACACAGTATCGTCGCTGATTCTTTTAACAAGACTGCAACTAAA
TATCCTGACAAGAAACGAGTACCTGGACTCCGCAATAAAATTAACCATGCAGCAGGAAAA
CTGCAACAAACTACAGAATAGGTTCTATAACTGGGTTACATCGTGGTGGAGCGATCCGGA
GGACAAAGCGGATGATGCAATGGTAATGGCAGCAAAAAAGTCAAAGAAAGAATGCCAGGA
AGTGTATATTAATGAGCAAGCTTTCCTATCACTATCATGGTGGATTCTTAACAAGGGGTG
GTTGAGTTACAATGAAATAATTACAAATCAAATCGAAATTGAATTTGACGGCATACACCC
AAGAGATACTCTAACGTTAGAAGAATTTAGTTCTCGTCTCACGAACATATTCCGGAACAC
GAATTCCCAAATATTCCAGCAAAATAATAATAACCTCACGTCTATTTTGCTTCCTAAAGA
TTCCAGTGGACAGGAGTTTCTTCTGTCACAGACGCTTGACGCGGATGCTTTAACAAGTTT
TCACTCTAACACACTAGTTTTTAATCAATTGGTGAATGAACTGACCCAATGTATCGAAAG
CACAGCAACATCCATAGTGTTAGAGTCTCTAATAAATGAATCATTCCATTTCATAATGAA
CAAGGTCGGCATAAAGACAATAGCCAAGAAAAAACCTGGCCAAGAAGATCAGCAACAGTA
TCAAATGGCAGTTTTCGCTATGTCGATGAAAGACTGTTGCCAAGAAATGCTTCAAACAAC
TGCCGGGTCTTCCCATAGCGGCAGCGTGAACGAATACCTGGCCACTCTGGATTCTGTGCA
GCCGCTCGATGATCTGAGCGCCAGCGTATACAGCAACTTTGGCGTCTCCAGCTCGTTTTC
CTTCAAGCCTTAATCTCTGAATAAGTACTGACACTCACACCAGAATATATATATATATAG
CGTAATCTTTAATACAGTAAGTGTGCAATAGGTAACATGACATTACCCTGCAGCGATTTA
ACGGGCGTCTTGGAGAAAAGAAGAGAAAGGGAAGAAATAGGTTGATATATTGAGGGCAGA
GAAAGTGATAGCCCAACGTTGGCAAAGATATAACAGAAAAGACGTTATAAACAATACAGG
AATACTAACAAACGTAGCGCAGATATGGTGACTTCTAATGTTGTCCTAGTGAGTGGTGAG
GGTGAACGATTCACCGTAGACAAGAAAATCGCGGAGAGATCCCTGCTATTGAAAAACTAT
CTGAACGATATGCATGACAGCAACCTACAAAACAACTCAGATTCAGAATCAGATTCAGAT
TCGGAAACGAACCACAAAAGCAAAGACAACAATAACGGTGACGACGACGATGAGGATGAC
GACGAGATTGTGATGCCCGTGCCCAATGTTCGGTCTTCCGTTTTGCAGAAGGTTATCGAA
TGGGCCGAGCACCACAGAGACTCTAACTTCCCTGACGAAGATGACGACGATTCCAGAAAG
AGTGCTCCCGTGGACTCATGGGACAGAGAATTCCTGAAAGTGGACCAAGAGATGCTATAC
GAAATTATTCTGGCGGCAAACTACCTCAACATCAAGCCCTTGCTTGACGCTGGCTGCAAG
GTGGTTGCTGAAATGATCAGGGGAAGGTCTCCCGAGGAAATTAGAAGAACGTTTAATATC
GTCAACGACTTCACTCCAGAGGAGGAGGCTGCCATTAGGCGTGAAAATGAATGGGCTGAA
GACCGTTAGCCTACATTTCCTCTGATGACTGTGATCCTTTCTTCCGATGATAATGCGCCA
TTTCAGAGCAAGATAGGCAAAAATAAGCAAACAAGGCTTGCTGTCATGCAATGTGTACGT
TAGTCCACCATAACCAAGCATGTATGAATTATATATGTATACAGTTTACATAAACTTCAA
ACTACAATAAGATGTGTGGTCCATCGTCGTGTGTAGCGATAGGCGTCTTCTAAAAGCCGC
AAAAGTGACAAGAAGAAAAAAGGAAAATTATTGAGTTATAAAAGCTATTGTTTACATGAT
GAGACGGGATAAATTTAGGACAGATAGCTGTAAACACTCCGTTTTGAATCATATTTGTGA
AATATTTGGTCTAAATTTTAAGTCAAGTTTATTTTCTTCGAGCATTTCAACACCAGCTTA
ACCCTTTGCTTTAAATTATTCATCTAAAATAGGGTATATTGATTGCTAATCACATATAAA
TATATAGAAGCAGCAGCTGTACAGATATCCCTAACCAATGAGGGATGAAGCTACTCGCAA
AAAAAGGTCATTTAGTGATGGTCATTTTTTCAAGAAACTGAAATTGATGTCAAGGAAAAA
GCAACCTGTTATGGAAAGAAGTAAGACCACTCGTACAAGGAAGGAATCTACCAATTCCGC
AGCAAAATCATCCCTATCATTAAGAAGGGCCAACAATGGCAGAAAGACCATCGCTAAGAG
AAGAGTACTGACCGACATAGGCTCTACTAATGAAGGTGTTGCCGGTAACTCTGGTTCAAA
CTCTCCTGCTCAATATTCTCATACTCCTCATTTTAGTGATTCTATCCCACCACTGCCTTT
AGAGCTACCAGATATCGTCTCAATAAGGAGTAGTAGAAGTCATATTAGTAATAAGAGTAA
TAAGAACAAACATGGTATAGACTTGACTTTCATACCTCGAAGATCGCTACAAAATTCTAA
GGCTGGCTTGAAGAAACTGAATACTTCTCCACAAGGTTATTTTAATATTCCAGTGACTAT
AGATAGAGCAAGTGAGAAAGTCAAACATACTGATACTAAAAATACATTCAATTCTTCGTC
TTCTGAGAATGAACGACCAGTTTTGAGCATCTTACAGAAGGATGACTCTCAAAGTTCTTC
GCACCCAGCTATCGATTCAATGTCAGCACCCAATAATATTAACAACAATAACGACATTGA
GAATTCTTCAAACAGTCTATTTGATACTATTCTATCAATTGCTCATAGTGCCATATCTCA
TGTCCCTAAAATTTCAGCCTTAAATACTGAGATACAACGTGAATTTTCGCATTCAGGTGA
AAGTCATACAGGTTCAACTCGCCATCCTTATTTCCATATCCACCACGCGCAGCAGCAACA
TCCCTTGTCACAGCAACAAGGGCCCTTACCTGTTTCCGAAAATGCTAACCAAAATCCTAA
TGACACAGTGCTCATTCATTCCCCCTCCGCTAACACAGCCCACCGCAGTTCATCATTTTT
GCGTCATTTAGATTATTTACTATCCCCCACTTCTGGTCCAGCCTCTGATAAACATACTCA
AGTAGAGGAAGGGGATGACGAGGAAGAGTTATCGCCTCTTTCCAAAGCATTTCTTTCACC
ATCAACTCAACTGGTACCTACAAATACATCGACTACGCCCCTTTCAGGTTCTTTGACACC
TAACAATAGAAACGTAAATGCAAACTCTAACTCTGAAACCGAGAACGACAATGATAGGGA
TGATAGATCAAATGTTGGCAAAGTGAAATTTCAGCCCTTGAAAGTACACGAGCCTGCAAT
CTCAACCTTTGGTAAAGGCAACTTAACTTTAGAGGCAGTGGCAGGATCCTCTGATATTGA
TAATACAACTATTGATCTGGACGAGAATAATACCAATAATAATCCAAATGCAAGTTCAAC
AAACTTGAGTCATATTAGCAAAAGTAACGTAAACAATAATCTCGGTCCAAAAGAATTAAA
CACAAGTTATCGTAATAGTAGCTATATCGACATGGCAAGGTTTGAAAATTCACAATCGAA
CCTTTCTAGCCATAGGGCAAGAAGTAAGACACTGCCCGCGAACAAAGCATTAGAGAATGC
CGTTGGTGATGAAGGTAATAGTAAAAGAAATTCAAGATATTCTTCTTATTCAAACGATAT
GGCCTTTGATGATGCCGACGAAAGAAAATTCAGAGGTATGTCCAAAAAATTCTTAAACAG
GAGATCTTTTTCACCTTCGAACTTAGGCAATAAAGTGATCCCTGGAATTAATTTAAGAAA
TTCATTCAACAAAAATAGGAATAGTAGTTCTGATTTCTTTAGTACAAATCAGGGACAGCA
AATGCCAAGAACAAGTACTGCGGGCTCAGGTAATATCCATGCAATAATGGGTTTGGATTC
TGGCAATGATGATTTCAAGTTAGAAGGTATTGAATATGCTTCAGAAAAGAAAAACAGCGA
ATTTCATACCCTTTTCAAGGACTGCGATATTAATCCTAACGAAAAGTTAATTGTCGATCA
TAGTTGTGCACTATCTCGTGATATTCTTTTACAAGGAAGGATGTATATATCTGATGCACA
CATTGGATTTTTCTCAAACATTTTGGGATGGGTCAGTACAGTTTTCATTCCGTTTAAGGA
AATCGTTCAGATTGAGAAAAAGACTACCGCCGGAATTTTCCCCAATGGTATTGTAATTGA
TACGTTGCATACAAAGTACATCTTCGCCTCTTTTATGTCAAGGGATGCTACCTTTGATTT
AATTACAGATGTATGGAATCAGATCATCTTAGGTAAAAAATATAGGAATGGCTTCGGTAA
TAATGACGACGGTACGATAAGCGATTCGAGCAGTGCATTTTTTGATGATTCCGATGACAA
TGACGACGATGGAGACCTGGATGACGATGACCCTGATATTAATAGCACAGATATGACATC
TAGTGACGATATTGATGCTGATGTTTTCAATGAATCAAATGATCTTGGTAAAAACCAAAA
ATCTACGAACTACTTATTGGGTCCCAATAAACACTCTCCAACCACTGCTGATTTCAAACC
TTCCAATAATGATCATTTGGTTATTGAAGCAAATATTAATGCACCATTAGGAAAAGTAGT
AAATCTTTTATACGGTGAAGACGTCTCTTACTATGAAAGGATCCTTAAAGCTCAGAAAAA
TTTTGAAATATCGCCAATCCCTAACAATTTCCTCACAAAGAAAATTCGTGACTATGCATA
TACGAAACCGTTATCAGGCAGCATTGGTCCAAGTAAAACAAAATGTTTGATCACAGATAC
TTTAGAGCATTATGATTTGGAAGACTATGTTAAAGTGCTCAGTATTACCAAGAACCCGGA
TGTTCCTTCAGGGAATATCTTTTCAGTGAAAACTGTTTTCCTTTTCTCTTGGGATAAAAA
CAACTCCACCAAATTAACAGTTTACAATTCTGTTGATTGGACTGGTAAAAGTTGGATCAA
AAGTATGATTGAAAAGGGAACATTTGATGGTGTTGCGGACACGACAAAGATAATGATATC
TGAAATTAAGAAAATCTTAAGTGATGAAGACTCAAACATAAACTCAAAGCATCAAGCCAG
CAATAATGAATCAGAAGAAGAAATTATTAATCTGCCAACTATTGGACCTCCAGTTCATGA
TCCGACGGAACCTGATTTTCAAAAAGGAAAAGACGATACAGTTATCGATGAAAAAATTAA
TATACCAGTTCCTTTAGGAACAGTGTTTTCACTATTGTATGGTGATGACACATCATATAT
TAAGAAAATCATCGAAAACCAGAATAACTTTAATGTTTGTGATATTCCAAAGTTTGTGAA
TAACGCAAGAGAGATCACCTATACCAAAAAATTGAACAATTCATTCGGTCCGAAGCAAAC
TAAATGTATAGTCACAGAGACCATCGAGCATATGGATTTGAACAGTTTTTTTATGGTAAA
ACAAATAGTCAGATCTCCGGATGTTCCTTACGGTAGTTCATTTTCAGTACATACGAGATT
TTTCTATTCCTGGGGTGATCACAACACAACGAACATGAAAGTTGTCACCAATGTTGTCTG
GACAGGTAAATCAATGCTGAAAGGAACCATTGAGAAAGGTTCAATTGATGGACAAAGAAG
TTCAACAAAGCAACTCGTAGATGATCTCAAAAAAATAATTTCTAATGCTAGTTCAACGAA
GAAAAAATCGAGGAGAAGAGGAAAGACGGTAAATAAAAGGAAATCATCACCATCCACTAT
CAAGAATGAGAAGAATGAAGAAAACTTCGAAGATACAAGTACCAAAAATTCATTTTTTTC
CGCTTTCTCAATGTTACAACAAGTAAACATAACATCCGTTCAAGGAATTATGACAATTAT
CTCTTTTTTTATTTGCTTGATTTTCTTCTTTAGATTATTATTCCATTCTAAGAATACTTC
GAACATCCAGATTATTACTCCAGGAACAATCTTAATTAATGGAAATGAATATAATTACGT
TCCTAATTTTAAAACACTCTATCATGTTTACGAAGATAATATTATAAAAGATGCCCGCCG
TAAAGACTCGAATAAAAATAACATAGTCACCGATACGGAGGGTCTCATATGGGACTGGTT
GATAGATCGTGGAAATGGAACCGTTCAAAATAGTGTCTTGTCCAATCATATTAAGGAGAG
TAATAACAAGAAGGTTAAGCTCGTAAATGGAGTTAGTGATCATAAAATACAGCAGCTAGT
TGAATCTATAAAAATCACCGAATTGCAGCTGCAAGAAATGAAAGAATTATTGGCCCAAAC
GGATAACACGTCGGCTACTAACCAATTACTTTGATAAAATAACATTTTTCGTTCTAATAT
AGTCAAGTAGGAAAATTCTACTCGACTTTATTTTGTTCTTTTGATCTTATTTCTTTTACT
TTAATTATATATAGGATATTTTCTTAGGATAATTGTAATAAAATGCATTAATAGTTTTAT
ATGTCCATTTCTGGTGCATTACTGGACATAATTTCAGTTCCTTTCACCAAAGAATTTATA
GCCTTGGAATATTTCCATAATTTGTCCCACCGGGTAATGTGCGTAATGCAATAACATATA
GCATCTATATCTGGTAAGCGTAGAAGAATTAACAAACCTAAGAATAAAATACAAATATGT
TTACAACCAAAAAATCAACTTAAATAGATGAAGAGCTCGCATATCAATTTTAACAGACCT
CGCTGAAAGACTCTGAATCCTTATCTTCTTCATCTATGGACATTGCATCTGATTTCTCGT
CAGGTAAAACAAAACTTACATTTTTTGCTACAGTTGACGTGTCTTGAATACTCATGTTTT
CCAGGTTTTTGGATGTGTCAATTTGCTCCGCTTCTGATCTCGTTCTTTTCCTTGAGTTAC
TTTGCTCTGTTGTATTGTCAACTGCCGAAATATTAACAGTTGTTTTAGTCAATTCTGTGT
TATTTCCATCAGTTATATCAGCAGCGTGTTCTATGGTGTCATTTGAAGATTTATTGAATG
AATTCCCCAAAATAGACGAGTATTGGTCATTCGCAGTGTTGTTCTCATCTTTTGTCTGAG
TTTCTGACCTTTCATTGATCTCTTCAATCAGCGAATTCAAATTATTCCTTAGCTTGTCCA
GAGCATTTTTGCTAACATTGTCTAAATTATCATTTTCTGCAATATCGTCAGAATACTCAA
GAAGTTCTTTCAAAGTAGAATAATCTTGTTCAGAAGAAAGAAATATAGCGTTTATATTAG
TGATGATCATCTTCTTTATTTCTTTCTTCTCAATTTGAGCGTATATTTTGAGCACATCGA
TCAAGAATGTAAGCTGCACTGTATCTTTTTTTGTTGAACCTGTCTGGTTAACTAAGTTAC
GTGGATCAGTCCAAAATAGCAACTGTTGAAATATTATGTTAGGCTTTAGCATAGCTTCAC
GGTCTACCTCAGGTATTACAGAGCTCTGTAAATCGTCCCAAAGAACACATAGTCTTAAGA
GTATGTCCGCAGCCGTCCTAGATATACGTTGTTGATGAGCAGGATGTGAAAAACAATAGA
CTGGAATGCAGAAGGCAAATGCCTGTACCAGCGCTTCGTTTGAGGAATTTATCGGCGAAA
AATATGACAAAACCAACGTTTCAAACAAATCATCATCAGTGAACACGTCTGCCAAAAATA
GTTTGCATAAACCCTCCGCTGCTATCACCTGACATTCCGGTAAACCGTTATTCTTTAAAA
CCTTGTAAAATATTTTGTGCAACGAGATTGAGTCAACTTTGCCTTCTCCGTCTACCACAG
TGTTCCCATGTACGGAAAAAATATCTACAATGACTTGTAACGCAATATACTTTAATGATG
CATTACCTTTCGAAACGCACATACCTAAGATGTACATGTTATCAATAGCCAACTTCACAT
CCAAGAGACAACATAAACCAAGGTTCTTGACACCAAGCTCCCTAATATTTGGCGCGGTAT
TTCTAACCGCTGGTGTGATCAAAGTGTCCATCAACGACGCAATTAAAATGTTTTCTGTTA
ACGGTGTGTTAACTAGTTCTAGCATATATGATGACCTTGTAAGACAGAGAACAATTGTTG
CTGAGGACGCTTCCTTTTCGGGTGGGAGATTATTTATTATGTCACTCTCAGATACGTTGC
CGTTTCCCTGCACTAAGTTTTCTACAGCAGAATGGAAGGATGAAATATTGTCGTCTTCTT
CATCCTCGTTAACTTCGTCATTATGTGTGCCGTTTTCGTCCTCTTCATCGACGGAAGTCT
CATTTCTGCGATTAATCTTCTTGCTTTTTATTTTCTCTTCTTGTTCTTGTTTTTCAATAT
CGTCGTCTCTAATATCATTAATGATTTCTATTGCCATTGTTACAAAATCTTTTTCATTTA
TGGACAGACTTTTCATTACACGAATACCAATTTTAATAAGAGGTTCGGAGAGTGTAGTTA
AGGCCAGCATATTTCGTACCACTGTAAGCATCGATCTCCTTCCAACCTCATCGCTATAAT
CATACCTTTCGGCGGCAATCGATAGTTGCTCAATAATAAACTCTAAAGTGTTATAATCAA
AATGCGACTGAGAGTCATTAGAAATGTCGTTGTGATGATATCTGAGAAGAATATAATGGT
TTAAATGCTCGGATAATTTTGAGGCTTCTGGAAAGTTTTCTTCCAGCATTTCTGTTATAT
TATTATCCAAACAGTACAAATAAATAGCCCGAAAGAGGAAGGCAATTTCTACGGTAAAGT
CTTTCCAAATACTTTCAGGAAATTTGATTTTAGATAATATATCTGGCCTTGATTGAAAAA
GTGCTTCTATAGCCTTAACACACACTGAGGATCTTGAGACATCCAATTTTTCTAGTAATT
CTATCAAATCGCCATCCAGAGCATTTAACCAATCATGAGCAATGAGTCTCTTACACGCAT
TTCTCACTGATAATTCCCTATCTTCTAAACCCCACTCAATCAATTGATCAAAAATATGCG
GCTCAATATCATCGAAACACTTTCTTCCCATTGATTTCAAAATTCTCGAATACACGAGCC
TTCTATTAACGATGTTTACATCTCTAGCCCTCTCCAAGATATACGGTCTAGTATTATTAT
CATTGATCAAATTCAGCATTGCAGCCCTCCGTACTTCAGCTGACGGATCGTTCTGGATAG
AAGCAACTAGAGTTCTCGTAGCTTCAAAATTTTCTTCATTATCAGAAAGCTCAGTTAAAT
GTTCAGTTTGCTCTTCATCCTGAAATTTAGTTAAACAAAACACAGCCTGTATCCTAACCG
TTGGTTCTCTATCATAAATCCTCTTATTTAAAGACAATATTAATAAATTGAAAAGTGATT
CATCGATTTCCCCTATATTATCCATTATAACGGCTAATAACTGTAAAACTCTAAATCTGA
CGTTCTTGTCAGGGCTTTCCACACCACGCAAAACATGTCTTATGAACTGATCGACGAACC
TTGAGAATATCCCTTCTTCATCATTCGTGAGCTTATAGTTTTGTTTTTTGGCCAATATCA
ACTCCCTTTCTAAAGAAGCTATAAATGCAGCTACTAACTTTACTATCCTGTCTCCGATAA
TCTCATTCTTTTTCAGAGGAAGGATCTTAGTAACTAATTTATCGAACCAAAAGTTAAAAG
CATCTTCATAGCCTTGCTCAACAGCCTTTGACTGAATTTTCTTCAAAACTGCTATATGCT
TCCTGTGTCCTGCATATGAACCCTGTGCCTTTTGAAATACTTCAGCAACTGAGTTAAAGA
TTTTCGTATTAATGTCAATACCATCAGGATCTTGCATGATGGGCGCGGCCTGTTAACTTC
TTTGTCTTATCCAAGGCTGTAGGCATTACTGAAGTGTTTTTGTTTGATCTTCAAAGAGCT
AAAAAGGTAAACAAACACGAAGGCTCTACCCTTTCATATGCGGTGCACGGATTTTAAAAG
TCGCAATAACTCAAGAATACGATAGATGCAATAAATCAGAGGTAAAGTGCTTTAGGCTAA
TACTATGAGCAATTCAGCATAACCTGCATTATCTCCTTGTTTTCCTTTGTATCCCCCATG
ATTTTTTTTTCTTGTTATTCCTCTTGATACCATATTAGGCAGGATTTTTTTCAAAAAACC
AAATGAAAAATTTTCAGACTGACAAGAAAAAAGCTACGAATGAGCTCATCGCTACTTTCA
GTTTTAAAAGAAAAGTCAAGAAGCCTGAAAATACGAAACAAACCGGTGAAGATGACCAGT
CAGGAAAGGATGATAGTGCATAGATGCAGATTTGTGGATTTCACTCCTGCCACAATCACA
TCTCTAGCATTTTCACATAAATCAAATATAAATAAGCTAACTCCGTCCGATTTGAGATTA
GCTATTGGTAGATCTAATGGTAACATAGAAATCTGGAATCCTAGAAACAATTGGTTTCAG
GAAATGGTTATCGAAGGTGGCAAAGACAGATCAATTGAAGGCCTTTGCTGGAGCAACGTT
AACGGCGAGTCTCTAAGGCTGTTTTCTATTGGCGGCTCGACTGTGGTAACAGAATGGGAT
TTAGCAACAGGTTTACCATTAAGAAACTATGATTGCAATTCAGGTGTGATATGGTCTATT
TCCATCAACGATTCACAAGACAAGCTGTCTGTGGGTTGCGATAATGGGACGGTGGTCCTC
ATAGATATCTCTGGCGGGCCTGGTGTCTTGGAACACGATACTATTTTGATGAGACAAGAA
GCCAGAGTATTGACTTTGGCTTGGAAAAAGGATGACTTCGTGATTGGTGGTTGTTCTGAT
GGTAGAATAAGGATTTGGTCTGCACAAAAAAATGACGAAAACATGGGTCGTCTATTACAC
ACTATGAAGGTCGACAAGGCCAAAAAAGAATCAACTCTAGTTTGGTCAGTTATATATTTA
CCAAGAACTGATCAGATTGCCTCTGGTGATTCTACAGGCTCCATTAAATTCTGGGATTTC
CAGTTTGCCACGCTAAACCAGTCATTTAAGGCGCACGATGCAGACGTACTGTGTCTAACT
ACCGATACTGATAATAATTATGTTTTTAGTGCTGGTGTGGACAGAAAAATCTTTCAATTT
TCTCAAAACACTAACAAATCTCAAAAGAACAACAGATGGGTAAATTCTTCTAATAGGTTG
CTTCATGGAAACGACATTAGAGCAATATGTGCATACCAATCTAAAGGTGCAGATTTTCTA
GTTTCAGGAGGTGTTGAAAAAACACTAGTCATCAACTCACTTACTTCTTTTTCTAATGGA
AACTACAGGAAGATGCCAACTGTCGAACCTTATTCAAAGAATGTTTTAGTTAACAAAGAG
CAACGCCTTGTTGTTTCATGGAGCGAATCTACTGTTAAGATATGGACAATGGGAACCGAT
TCTAGTACAGAACAGAATTATAAGCTAGTTTGCAAGTTAACTTTAAAAGATGACCAGAAT
ATCTCAACTTGTTCTTTATCACCTGATGGACAAGTTTTAGTCGTAGGGAGGCCCTCTACC
ACTAAAGTTTTTCATTTACAGCCCGTAGGTAATAAATTGAAAGTGACTAAACTAGATAAT
GACCTATTATTGAGAACTTCCACAAAATTAGTCAAGTTCATCGATAATTCCAAAATTGTC
ATATGCTCTTGCGAAGATGATGTATTTATTGTGGATCTAGAATCTGAAGAAGATGAAAAA
CCGCAAGAAGTTGAACTTTTGGAGGTTACTTCAACTAAGAGCAGTATCAAAGTTCCCTAT
ATTAACAGGATCAACCATTTGGAAGTAGACCAGAACATTGCAGTAATTTCTCGTGGCTGT
GGAGTCGTAGACATATTAGACTTAAAAGCAAGGATTTCTAAACCACTTGCTCGTTTGAAT
AATTTCATCACCGCTGTTCATATCAATACTTCTAGAAAATCTGTAGTAGTAATTACTGCA
GACAATAAGATTTATGAATTCAATATGAATTTGAATTCGGAAGCCGAGAATGAAGATAGC
GAAAGCGTATTAACTCAATGGTCAAAAAACAATACGGATAACTTACCAAAAGAATGGAAG
ACATTAAAAGAGAACTGTGTAGGGATATTTTCAGACATAGAAAATAGTAGCAGATTATGG
TTTTGGGGGGCTACTTGGATATCAAGAATAGACTTTGATGTTGACTTCCCTATAAATAAG
AGAAGAAAACAGAAAAAACGTACACACGAAGGGCTAACTATCACAGATGAAAGTAATTTC
ATGAACGACGAGGAAGATGACGAAGATGACGATATTGATATGGAAATCAGCGAAAACTTG
AATGTATTATTAAACCAAGGAAACAAAATAAAGTCCACAGATGTACAAAGAAACGAAGAA
AGCTCCGGTCACTTCTTCTTTACTGATAAATATAAACCTTTACTGTTTGTTGACTTAATT
TCTAGTAATGAATTGGCAATAATTGAAAGAAATCCATTAACTTTTCACTCCAAACAAAAG
GCGTTTATTCAACCAAAGTTAGTGTTTTGATTAATTTAAGTCAACATACCGAAGAATAGA
GAGATGCTATTAAAAGGCTATCATACTCTAAGGGCATTTTTCAGTTACAAAAAACTCTAA
TGGCGTTAGTACTTTATAGAAACTCGCTAATGTAAAATATCCAAGCACATACGCAGACAT
ATATATGTAGTAATCACGTATGCAGACATTAAATGTGAGCCATTTATTGGTATAAATGTA
TTCCTGAATTACAAAAGTACTGGCGATGGAATCACTCTGGCTAAATCACTGTTATTTCCA
GGCAGGGTAATACTTTGGGAAAACAATAGAATAATGAAAACATATGATCAGTAGCTAAAT
TGACCGACCTAAAGAGCAAAGCCGGATCTCATGGTTTTTAAAGGGATATCACCGAATTTC
CTGGCGACTTATCTATTATGGATCTTGAAAATGTTTCATGTCCCATTTGTCTAAGGAAGT
TTGATAACTTACAAGCACTAAATGCACATTTAGATGTTGAGCATGGGTTTAACGATAATG
AAGATTCACTCGGTTCCAATGACAGTCGTTTAGTCAATGGTAAACAAAAAAAGGCCAAAT
CTGTTGATAGCAGTGCGCAAAAGTTGAAAAGAAGCCATTGGGAAAAATTCAAAAAAGGGA
AGAGCTGCTGTCACACATGTGGAAGGACTTTGAATAACGATATTGGCGCCACTAATTGTA
GGAAATGTGGTAAACTGTATTGCAGAAGGCATCTTCCTAATATGATTAAACTTAATCTTT
CCGCACAGTATGACCCCAGAAACGGGAAATGGTACAATTGCTGCCATGATTGTTTCGTCA
CAAAACCTGGCTATAACGATTATGGCGAAGTAATAGATTTAACACCAGAATTCTTTAAGG
TACGAAATATAAAAAGGGAGGACAAAAACTTAAGGCTATTACAATTAGAAAATCGGTTTG
TCCGTCTAGTTGATGGTCTGATTACACTCTATAACACATATTCTAGATCCATTATTCATA
ATTTGAAGATGAATAGTGAAATGTCCAAGTTAGAACGTACAGTTACTCCATGGAGAGATG
ATAGAAGTGTACTCTTTTGTAACATATGTTCCGAACCATTTGGGCTATTACTAAGGAAGC
ATCACTGCAGATTATGTGGTATGGTTGTTTGTGATGATGCAAACAGGAACTGCTCAAACG
AAATAAGCATAGGTTATTTAATGTCTGCAGCGTCAGATCTACCATTCGAATACAATATAC
AGAAGGATGATTTACTTCATATTCCTATATCCATAAGATTGTGCTCGCACTGTATCGATA
TGCTATTTATTGGCAGGAAATTTAACAAGGACATTAGAATGCCGCTAAGTGGAATATTTG
CTAAATATGATAGCATGCAAAATATATCCAAAGTAATTGATAGTCTCCTGCCCATTTTTG
ATGACTCATTGAATAGCCTGAAGGTGGAGACTGCCAAGGATTCTGAAAATACACTTGATC
CAAAGAATCTGAATGATCTCGCTCGATTAAGACATAAATTACTCAATTCTTTTAACTTGT
ATAATACACTAACAAGACAGCTCTTAAGTGTAGAACCTCAAAGTCATCTAGAGAGACAAC
TTCAAAATTCGATCAAGATAGCTTCCGCTGCATACATAAACGAAAAAATCCTACCGTTGA
AGTCGCTTCCGGCAATTTTGAACCCAGAGGGCCATAAAACGAATGAAGATGGGCAAAAAG
CTGAACCAGAGGTAAAGAAATTATCGCAACTAATGATCGAAAACTTGACCATAAAAGAAG
TGAAAGAGCTGAGAGAAGAATTGATGGTCCTAAAGGAACAAAGCTACCTTATTGAGTCCA
CAATTCAGGACTATAAGAAGCAGCGTAGATTGGAGGAGATCGTCACACTTAATAAGAACT
TAGAAGAATTGCACTCAAGAATACATACCGTTCAATCGAAGCTGGGTGACCATGGGTTTA
ATTAAGACATATCTTTATTATTCGATCATTCGCGGAATCTCCACGCTAATTGGTCCGCGG
AGCCAATCAGATCTATTTAAGGGTATAAATTTTTCTTTAGTTTTTTTGACTTTTCACACA
GAAATTTTAGATAAAAGGAAGTATTATATCGGAACATAACGTATATAGGAACTAGCTGAG
TGAGTTAAAGGATGTCGACAGTTAATGTTTTGAGATACTCTGCGTTGGGTTTGGGGCTAT
TTTTTGGTTTTAGAAATGATATGATTTTGAAGTGTAATGCTAAGAAGAAAGAGGAGCAGG
CACAGTACGAGGAGAAATTGAAGCTGGTAGAGGAGGCAAAGAAGGAATACGCCAAGCTAC
ACCCTGTAGTAACTCCTAAAGATGTGCCTGCGAACGCCTCATTTAATTTGGAAGATCCTA
ATATAGATTTTGAAAGAGTTATTCTTAACGCCGTTGAATCCCTGAAGGAAGCTTCAACAT
AAATAGAAGCTTCAACATAAATAGGATACTAAAAATGCACATTAGCTCGCACTGAATGAC
GAAGTTATGATGGATTCTCGTTCGCTAGATGTTCCATATTTTTTTCTTCATTCGTTAGTG
CACAAACAATAAGGAAAAAATGAAATGTATATATTCTAGAACATACTAATATCATACGTA
TCGTATTGTAAACAAAATTCACATTCCAAAAATTTTTCAGATTCTTACTTTATATTATTT
GCATCAAGCTTTATTAACAATGACACGTTATTTTATATGTACAGGATACTATAATGTCAT
ACTATTTAGGATCACCTCCTAACTCTGCTAAAAACCCTTCCAGGTGGTAGGCCATATTTT
TCTCTGACGGCGGCGACTTTGGCATCCCATTCGCTTCTCCAGATATGTGCCCCAATAGCG
GTTAGATTGTATTTCTTCGTAAATTGCCTGATATCAAAATCATCTCTACTTAGTTCCTTT
CGGTCAATCTCTAACATGTTAGGACCTTGCTTATCCTCGATTAAGGGTTGTCTGAATACC
CAAACAACGAATCTCTGTTTTCCAGCATTCTTTTCAGGTACCGGAGGTAAGTAGTCAGCG
ATAATATTAGAACTGTGGAACTTTCTTGGATCTATTAAATTGTCATTATAAGTCAAATTA
ATATTCACCAATCCGTAACACAAAGCCGTTTTAAATGAGTCATTACTCAAATCTGGAACA
TCAGGATTGACTATCAGTACCGTATACAATTGTTTTTTAACGTTCACAAGTTCATATTCT
TGAATTTTGAAAATGGGACGCATGGATGTGACATTGGACGATAGAAATTCACCAGGTTCG
ATCCACTTATTTACACCAGTAGAGAAGGGAAATTTGATATTCACTTCTGCCCGTGGAACC
AGAGTTGGAAGAGTATCAGGAATGGCAGCCAACGTTTCTAACCTTTGCATCAATAACATC
TGGCCGTACGATTCCCAATGTTGTTTCCCCAAATGTCTGTATACTGGCACATCATAATCT
ATTATATCCTTAACATTGTTCAACTTGTTATTAAACTGAAAATTGTATTGTACCTCAGGA
TTATTGATCTCTGCTTTTATGAGAAGTGCATCCTTCTTCAAGGGATTTTTAGTCTTATTG
GCCAACTCATAAAACTTACTGGATCTTTGCTCAAGAAAATCATAACTCATCCTGAAAATC
TCATCAATGTGTTCTGGAGGTGAATATTTGATACGGTTACTTCTTCTGCTGATAGATGGT
GGGTCTAGAGAAGCTTTCTTCTGGAAAAGGTAATTTTTCACTTTTGAAGATTGGATAGAA
AGTGAACTAGGCCTTGTGGTAAAGTCCGACCAAATATGCGAAGTAGCATTAGGTTTTTGG
AGGATTTTAGTGGTATGAATAGATCTTCGTAACATAGTTCGGCAGTGACCTTGATTTCTG
TAAAGATCTCTGAATAAGCTTTTTGCTGTAGTCTGATATTGTATTGGATACTGTTGTCTT
ATCCCAGACCTTCCGGCTTCCGGTTTAGCCCGGAAAATTTGAAAAGACTGCGACAGTAAA
TCCCAAACACATAAGAAAATAAAAAAAGGAATACATAAACAAAAATGGATATATAAAGGC
TAATTTTTTTTGTTTATCAAATATTCCTTATTTTTTAACTTTCTTAAAAATATTTAAACA
CCAGATTTCGAAAAAAGTAATATTTATTCTTTAAAAATGCGGTGACCAGCGGGCGATGAT
AATCAAATATTTAAAAATGATATAATGATAAAACTTGAATTATTTTTATAGGAAAAGTGG
AACCAAAAGATTTCTAATGCACTGATATCATGAGCAGTTAATGAAAAATTATTAATATTA
TTTTTTTTATATTTTTATTCAAAAATAACATTCAAAATTTAATTTTAATAAACTCATTTA
AAAAAAACCTCTAAAAACATGAAGATAGAACTATAATAACGGCTTCAGTATTCAAGACAA
AGCCATGTGCAGGTGAAACGATAGAAAAGTGACATAGCCGAGACAATCTAAATGAATTCC
TGTACTCATCTCAGACTAGCATTAACAGGGACTTGCATAATTATATCTCTATCTCTGTGT
CTATGTATCTATATATATATATCGACACAAATGCAAAAAATTACAAAATTTTCACCCACC
ATAGACGCCAGTGAAAACATGTTTAATTTCTTCCAACGTGTAGTTACCTGCCAAACACAA
TTGTAACAAGATTCTGCTCTTTTCAGGGCTTAGATAACCAGAGGCGATGAGATTATCCTC
CTTTGAACCTTTCTTTGGTACGTTGGCAATAGGCACCATACCATCCATCGATCTCTTGGA
ATATACGATCGGCAAACTCAATTTCATGCAGGTTTCATTGACCTCCTCCGGCAATGAACC
AGCACCCATGGTAGCAAGAACAATACCATCGTACTTATCTGCCACTAAGTTGACTATAGC
TGGCGGAAAGGCTTGGTGAGCATATAAAATGCAAACCTCTGGTAATTTAAAATGCTTACC
GTCCACTCTCAGTTTGAATTTGTGGCAACCTTGCGGTTTCACAGGAGGATAATAGTAGTG
AATTTCATTGTTGACAAAATTTCCTAAATAGCCTTGTCTAACATTAAAAGAATCCAAACT
GTTTGCATTCGTCTTAGTAATGTAGTAACCAGAGGAAATTTGGTCATTCAAGGAAACAAG
AACACCTCTTCCTCTAGATTTTGGATTTGAAGCAATGCAAATTGCTTGGTAAAGGTTCAT
AGGGCCATCAGCAGAAACGCTGGTTGAAGGACGCATCGAACCAACAAAAACAATAGGAAC
GTCGCCAGCATCAATAGTACTTTCAATAAAGAATGCAGTTTCAGATAGCGTATCAGTCCC
ATGGGTAATAACTATACCGTCAAAAGCCTGCAACGATTCTGAGACGCCCTTATAAATTTT
ATAAAGAATATCCTCGTTTATGTCTTTAGAATCCACGTTGCATAGTTGCTCATATTCAAT
GTCACAGACCTTGGATATATCTGGAATGGCATCCAATAGATCTTGGATGGTCAGGTCAAC
ATGATAGCCGGCAGTTTGAGAGGAGTCTATAGCTTTCGATGCAATAGTACCACCGGTACC
CAAGATTTTGATTCTTGGTAAGCTACGTTGTTGGCAAGCGATGCCGCTGCCATTCACAGC
GGCATTTTGAGACTTTAGAATCTCTGGAATAGTCTCTGGACAGTTGCTTTGCACAACAAA
CTGAGAATTTTCAACATCTGGGCAGATGGTAGTGATTTCAACTGAATCGCTTTTCATGAT
ACCCTTCCAAAAGTGCGATGAGAGTCCTGTTATCCTTCACTGTCTTCAAACACATTTCTT
CAACAAAGTCATCGTCATCATCTTTTTTTTTTTTTTCATCGAGTATTTTTTCACACGAAC
GGCACAAGTAGCCTTCAACTGTAATAAACAAAAGCAGATAGGGAGGAAAAGAAGTGAGTT
TAGGAGAAGAAAGCATAACATGGAGAACCCTCACGAACAAGTGCAGGCTAACATACTTTC
GCGAATAATTGGTAATGTCAAAAGGCTCAATGAGAGCGTGGCAATTCTTAACCAGGAGCT
TGTGACCATTAATAATCGGAACAAAAATCTAGAAATCATGGGCGCAATTTGTGATAACTA
CCATAGTAGCGTCCAATTCAACCTGGAAGCGACCAATAACAAGAAGCCACCTCTTTAATT
CACCAATTTTCTATATACGCATACTCATATACACATATATATATATATGCTATACCGTTT
CTAATATATTCATTTAAGATCACTGTTTCCTGCGAAAAGGAGAAAAAAATAACAGCACAT
CGCTTAACCTATTCCTGTGCTTCTGGAAAGGACGCAGCCTGCAAGAAGCAATCAACATCA
ATGTCAGATCCATTTGCACATTTACTGACTTCTTTGAAGAATAAGGACTCTGCATCTGCA
TCCAAGGAAACAACTCCTCAGAGCAGCAATTCGCCTTCCATTACTGGTTCCGCTGTTGCA
GATGTTGCAAGGACGGATAAAAGCCCCAATGATAGTCTGCATTCAATTTCAGCTCCTCCG
CTGATACCGTCACCGAAGGTAGATTTTTCTGCACCTCCTTTGGTCCCAACTAATAGCACC
ACTAAATCTAATACTGCCAACAACACACCTCCCTCGGCTCTTGCCACTACCGATGACGAC
TTCAATCAACTATTTGGTATGGGCACAGTAACTACAACGGATACGATCCAAAAACCGGAT
GAGGATTACTATGGAAGCAAGGAAGACCACCTTTACAATGGTGATGACGCCTTAGTTGAT
GAAGTTAAGGATATGGAAATAGCAAGATTGATGTCTCTAGGTTTATCAATTGAAGAAGCC
ACTGAGTTTTACGAAAATGACGTAACTTATGAAAGATATTTGGAGATTTTAAAGTCAAAG
CAAAAGGAGCGCAACGATCTAGCTATAAGAAAGAAAGAAAGTGGTATAAAAATGGAAAAG
TCAGGATTATCCAACATTGTTGGTACAGATAGCAATAATTTATTCAGCATGGCCACTAAT
TTTTTCAATAAGGGTAAGAAACTGGTAGACCAATGGACCTCCTTCCCACCTGAGGCAAAT
GATAGACTGAATAATTACTCAAAAACTCATGATAAGGTTGAGGATTATGATTTGCCTCAA
GTAAACGACTCACCCAATAGAATTTTGTTTGAAGATAATGAAGTCGTAGGGAACTTACCA
CCTGCCGATAATCCGGATCAAGATCTTTTAACTGATTTCGAAACAAAGATTGATATAACA
AAGAGGACAGCGCCTGATGTCTCCCACTCCTCCTCACCGACTTCTGGTATACTAATTGAA
GAAAGTTCGCGAAGAAATGAGCCTCTGATAGAGGATAGTCTTCTCGACTTTTCAGAAGAA
AATCTCACCAATAGTAAAAGCAATGAAGATAGCACCCTCTTCAATGAAAACAGCAACACT
GACTCTACAATACCCATCTCAGATATTGAATTATCGGGGTATAACGAATTTAAGGCGAAA
GGTACTAGTTTGTTCAAGAACGGGGATTATATTAACTCATTACAAGAATATGAAAAGTCT
TTAAATACATTGCCTTTAAATCATCCATTGAGGATCATTGCATTATCAAACATTATTGCC
TCGCAACTGAAAATCGGTGAGTACTCTAAGTCCATAGAAAACTCCAGCATGGCTTTGGAA
TTATTCCCATCAAGCAAAGCTAAGTGGAAGAATAAAATCTCAAATAGTGACCCTGAAAGA
TCATTTAACGACATCTGGCCAAAGATTATGATTAGGCGTGCTGAGTCTTTTGAACATTTA
GAAAGTTTCAAAAAAGCACTAGAAACATACCAAGAGCTGATTAACAAGAATTTTTTTGAT
GATAAAATCATGCAGGGAAAAAGAAGATGCCAAGACTTTATTAATCCTCCCCCTGTTAAA
AAATCCATGCCCGTTAAGAAGAAGACAACGACAACCTCGCCTGCAACAAAAAAACAGAAC
TTAACCGCTTCTTCTTCAAATTCTCCAATTTCTGTTGATAGCACTTCAGAAATAAAAAAA
CGGGAGCTAGAAAACGCTAAACTGGCGCTATATGATAAAGTATTTGAGAAAATTAGCTCC
TGGAAGGATGGCAAAGACGATGACATTCGTCATCTGTTAGCAAATTTATCCAGCTTACTA
ACATGGTGCAATTGGAAGGATGTCTCTATGCAAGATTTGGTTATGCCTAAGAGGGTCAAA
GTTACATACATGAAAGCTGTAGCCAAGACACATCCTGATAAGATACCAGAGTCCTTGTCC
CTGGAAAATAAGATGATTGCAGAGAATATTTTCAGTACTTTAAGTATTGCTTGGGATAAG
TTCAAACTGCAGAATGACATTAACTGATTTCCCTTGTGTGCCTGCTTCGCTCAGTTGTTT
TTGATATGTACTTTATACAAATATATATAGGAAAACAAATTCTTCAAAGCGCGTTAGGAA
AAAGTATGGAAAGGCTTAGTTTCATTTATTGACTTACAAGTGGCACCCAATTTGATTAAT
ATGAAAAACAATCTGCAAAAAAAAAAAAAAATTCAAAATATCACAATGTTAAAACACAAT
AGAAATAGGGCATTGTATTAAAACCACTGAACGACTAAAAATTGAAAAAGATTATGATAC
GTCAGCTCAATTATTGGTCAAGGAAGGCGTATCTCATTTATCCCTTTCAAGTTTTTGTAG
GCGCATTATTATCAATAGTAGTATCTTCAGAAACATTAAACCATCAAAAAGAGACATGCG
CTCTATTGAAATCGTCCAATATTTTCAATGTTATTTTTGCATACAAAGCGAACCAACTGT
GGCCATTTTTATTCTTTAGTTTGGCTTTTCTGCAAATATACTTCCACTATCTAGCAAGAA
TGGATATATTGCCTTTACCAATATCAAGTACCGAAACTAGCTCTTCCTATTTAACATATA
CTAACCATTGGCCTCTGCTCAAAAATAGAATAATCAGTATTATGATCACTCAATATGCTT
GCAAGTTCGTTCTAAAATATCTATTATTGTTTTTGAATTTCCAATTTATCGATCATGTTT
TCATTTGGACAGGGGGAGAATGCAGTTCTGGTAGTAAAACGACATCAGCTGAAAAGTGCC
GTCTAGAAAATGGGAAATGGGATGGTGGGTTTGACATTAGTGGACACTTCTGCTTTCTTG
TGAGTATAAGCATGATTCTTTGGATGGAACTACACTTATTCAGTAGATTTGTTCAAGCTG
AAGATATGTTTTGGGTTGTGAATAAGTGGGTACGAGCTTGCCTTGCCATTGTTTGCGCTG
TCCTAGTAATTTGGATATGTATTCTCTGGGTTACCGCTATTTATTATCATACTATCTTGG
AAAAAGTGTTAGGTTGCCTTATGGGTTTCATATGCCCTGTTTTCATATACCACATTCTAC
CCAAAATTGGGATACTACACAATTACTTATATCTATGATAAACAGAGAAAATTAGCTCTA
TCCTCTTTCTATAACGTATATTTTTGTTAACATTCACTTGAATATTGTCGCAAAAGAATG
GTTTAACTTTAATTCCAAATCATCCAAAGAACCGAGCAATGCAATTTCCCATTTACTTTT
ATTATTTTGACTAAAATCATGAATATCGTCCAATATTGAACATGAAACTATTTCATTTTG
TTTTACAAACAACTCGACCTTAATATCCTTCACAAAAAACGAAACCATTGAAGATTCTAA
ATCTAAATCTAAGTCGTGGATTATCTTCTTAGCTTCTAAGTCCTTAAAAATCTGTCGTCT
TTTCTGTACTTCCACAAGTTGCAGGAAGACTCTTTTAGCAAATAAATAGGCGTCATCATG
AGATATCACTAGTCCCCCATTGGTGTCATCAAATATACCTTGGACATCAATGAAACTCGG
GATTGTATGCTTGAACAGGAACCAACTATTCGATTTGATCCTCTTTTTCAACAATACATA
GTGAGGTTTTTCAAATTGGGATGTCCGTTCACTGAAGACTTCCAGTCGTATTCCCAGCAT
TTCTCTATCAACAAATATTTCACCGCTAGCATCTTTTATTTTAAGGTCAATAGGGTCCAC
AAGAGGGAAAAATGTTATACCAAACATTCTATAAACATTTTCCAGGACAATATAATCTTC
CAACTCACTTCTATCACTTGTACTAATATCGTCTATTTTTAGTTTTCGCTTTCTTTTTGA
AGGTGACGTTAGAATGTCTGTATCCAATAAATCTGCCACCCCAGGATCAAACATTTGGTG
CTGAACCATTGGCTGGGTCTTTAAAACCCATTCTTGTTCTGGTAAAATTTCCTCATTCTC
CAGCTTAGCTCTTTTCTTTGGTTCATACGGTATTGGCGTTGCTGGTATATCCGCTTGCGC
CCTTGATATGTCCTTGTCATCTGTCTCTTCCAATTCTGGATGCTCATTAAATAAAAAATT
ATTCAATTGTGGGAATTGATCGAATAGATCTTCAAATTCTTGTACTATAGGATTAGCGCT
CTCCTCATTTTTTCTTTTATCTTTTATCTTCGCTTTGAGCTTCTCACGACTTTCTTCTAA
TGAATTGACTGTGAAGATTCTACTATGTTAGTGTTCAACTTAATCATTTTTTTAAAAGAA
AGAAAATTGTTACAGCCTCAAAATCACATACTTTCACTGAGTAAAGATTCAATGTCCTGC
TGTAAATCATCGATTCTACTCATTGCCAGGAGCGTTACTGATAGTTTGAAAGAATTGCTC
AAGTAAAGAAATCACATTTTCCCCTCATTATCCATATGGCTTTTGTTTGTTTTTTCTTCA
GTTTTGAAATATGCGCGTTTTCTTACCATCATTATAAACTTAGGGAAGATCTATCATAGA
ATTGGTCGGCCATTACTGGCGATTAGTAAAACAATACATAAAGTTTGCATATTCAATGCG
ATAAAAATTCAAGACGGCCCAGGTATCGAATCCATGATATAGTGGTTCTTTTATGTATTA
AGCTACTATTTATTTAATAACTTCGCATCTATCAAAAGAAAAGACTGACTGTTCACACAA
TCATATCAATTTGATAACTGCTAATTACTTCCAGCTTAGGTCCCGCCTCTTTACTTTTCC
TTTCAATCGCCATCAAAGAGGCAACATAAGAAACCTTTGAAACTGGGACAGCGTATCCTA
ATAATGCAGATCCTGGCATCCTATATATACTGGAAGCAATTATTTCGCTTAACTTTGTTC
TTAAGCCAATCCTTCTGGCCTCACTGATATATTTCTTTTTATAAACTAAAAGATAGTGAG
GATAATAAAAAATTTTTTCCAAGAAAGTAGAGTTTTCTTTACCCAATTCAACGTTTATAG
GATTTCCGTGCTGTCCACACATCGGACCTGGCCTCAAAATAACTAGCTCCTTTAGCTTAT
TTGGCAAAGCTTCATCCAAGTCATTTTCTAATTTAGCTTTTATTCTAAAATACTCGAAAG
TTTTACTAAGAAAATCATTATTAAAGGCAGTTGTAACCACCAACTTTTTGTTAATTGTAT
TCGTGAATTCTTGTGCTAAATTAAAAGGTAAGTAATAGTCAGCAAAGGAACTTGGTACCT
GAGTTCTCCGCACTCTAGCTGAGGTGGAGCCCAAAGAGCACACCATAGTGCTAATATCAC
ACAGACTAGGCAAACTTCTACCGGGCACGTAATTTTTGTTGTCAATGTCAAACTTTTCCA
GCTTTTGTGTTCCTGAGAATATCCGTGGAAGCAATTTTGGCCAAGTTTCAGATCTGGGGA
TGATCAATTGCGTTACAGTAAAATTATAAATGATCTCAATACCTTTTTCCTTTCCGCATG
CATAATGTAGTGTGTAACTGAACTGTTTCTGATTATAAACAAAAGAATAACCATCTTTTC
CCCTCTCTTCAGGCGTATTTTTAATAAATCCTTCTTCAAAATTATCATAACAAAAAGTAT
TAGGACTAGACGGTACTTTTTCAGTGTCTTTTTCTTTCCTGCTTCTCAAGTAATATCTGC
CACCTTGCCAAGTAACTGATCTCATATTTATATAATCAATGGTCTTCATAAATGATTTCT
CCTCATTGATGCACCTTCTATTAACACAAAAGACATGTTTATTGAGAACGACATTTCCCT
TTATTTCACTTAAGCTATCAAGCTTGCCTTGTAGGTCCGAAACATTTTTAATATATAAAT
TTATGTCCAACAGGTTCTCTAAAGTACCTTTTCCTACTAAACTAGATGATCCAAACAATA
AAACGTAATCTGTAAACGTGTTGACACTATAACTCATTTCTGATCAACCTTTCTAGTTTG
GAATATTCTTCAAAGGGTCTATATGTATAAAAAGCTGTCATTTATATTAAAAAGAATTTA
TAGCGTTTACTGCGGATCAAAATTAAATACGTCAATTTTTCTTAAAATTTCTTTTAATCT
AAATGACACAAAAAATGTCACCCATCATTATATGTATTGAAAACCAAAAAAAAAAAAGGA
AAATTATACTTTCAATGAAAGACACAAAAATGAAGAAGTTCAAGGATATAAAAGTTAGTT
TTTACCTGTTGAATTATATGCAGAGTTACTGTTAAATTACAACAACTTATCGTTTCTTGA
TGAGTATTCAAGGTGACGGAATATTATCATATATGATGTAATAAAATGACATAAATGATA
AGAATGCGTTATCAAATTTAAAAGCAACTGAAACGCACGGATTGATGATAAAAAAGGATA
ACGATTGGTAACATTTAGACTAAAGAATAGATCGTAATATAGGAGATTTACCAATCTCAT
TTTTTGGGGATTCTTTTATCCTCAAAAAAAACTTCATGAATATTCTGTGTACCTAATTAT
GGATTTATCACCAATGCAATCCCAACACTTATTCACAAGAGTTACCTATCTTAATTAAAT
GCATTGAAATAGAAGAAAAAGTTTAATTTAAATCCGATTTGAGCGATTTGATCACAACGA
TCTGTTTCATTTTTCACCTTCTTATGACTACTGAAAACCGCAACGCAATAAAAATAAAAG
ATTGCATATATAAAAGACAGACCACCCATGAAGTTCCGTCTTATGTTAGCGGACTTAGCT
CAGTTGGGAGAGCGCCAGACTGAAGAAAAAACTTTGGTCAAGATATCTGGAGGTCCTGTG
TTCGATCCACAGAGTTCGCATTTTTATTTTTTCCCAGTGACGCAATTTTTGGATTGTTAA
TAATAGCGTCGTTACGTCACATATGGTCAGTATGATCACTTTAGAAGTAAGGAGAACTAC
CTAAGGGGTTTTAGATCACATTTTAACTTGCTTACTGAACTATTTACACGATTCTAAGCC
TGTATAAAATTCATTGGTATGAATAAATATGTTAACTTTTACTTACAGGAGGTACTGGCT
CAAGTTCTTTTTTAGATGCCATATCGTCTTTTTTTTCGAATGATTCCATTCTCTTTCTAA
TACTTGATTGCAAGTATTTTTCTACAAACCCAAGCTCGTCTTTCTTTTTCACATCACCTT
TTCTCTTCGCAACGATACACCAAGTAGTGCCTAAGTGAGTCCGTTTTTCTTCCACCAATT
CTAGGTCAGAATCATCTAACACTTCGCCTAAGTCGAGATTCCATCGACAGCCCCAAGTAT
TCAGTCTTCTTTCAGCTCTGTTGTCTAATATCTTATTTATAAAATCGTATTGACCTCTAC
CATGTTCCAGTAAAATAATTCTTCCATCTGGCTTTAATAACTTGCCAAAATTATTAAGTG
CCTTAACCGGATCTTCATGGGAACACAAACCAAACGCCTCCACGATAGTATCATATTTTA
CTTGGTTTTCCTTTTCATTCTCTAGAGAGGGCTTACCTTTCTCTGCTAAGTTTACTAGAT
TTTCCGCCTTTCCAACAACAAATGCAACTTTTTTATACTTAGGAAACTTTTCTCGGAATT
TTTTATGTGTAATTTCCATCATATTTTCAGAAGAGTCTAAGAATGTTATAGAGTTGATGC
GTGACATATCAAGGTACTTGATATTTCTTCCTGTACCGCATGAAACTTCCAAAACATCCC
CTTGACAATGTTTCATTAACCATTTCCTTCTTTTACCGAGAAATATTACTCTCTCTTCCA
TATTAATTGCCTTATCATATTCGTTAGCTTTTTCTTGGTAAAAGTTTGTTGTGTCTCTTG
CTGGCAATATTTGTTCATTCAATTTGTTTTGATCAAAATTCTGTACCCGAATATCATCGA
AGTTTTCAATGCCTTCTTCTTGCATTTTTTTGTATTCTTCTAATTTCAATTCATCTCTCC
TCCTTAGTTTTCCTTTCAATTCTTTAATCCTTAATGCTTCGTATTCATTGGCATTCCCTT
CTTCTTGTTTCTTCAACAATCTTTCCAGTTCTTTGTCTTTCGCAAACAGTTTTTTGGTAA
AGAAGAGACCATAGATTAAAAATATCACATAAGCACCGATCATGTACTTGGTCATTCCCT
TTGAAAACTTTTCTGATCTCGCAATAGCTCCCCACCTCACAAATCTATTAGGTGACCTCA
GTTGTTCTTCGAACCTCTCTTTGGCCAATTCTTCTTTTGTTTTTTGCTTACGAATGACTC
TATTGCTATTCATTTGGAAAACATTTTTAAGCTTTTTTTTACTTTTATCATCATCAATGT
GGCTGCTGTTATATTTATAAGATGTAAAAGATAATGATCGCCTTTGTGATTCCAACAAAA
GACTCCTGGATGCCGGTTGTCGAATGTGATGTAAAAGGCACGTAGGAAAGCGACGAAATA
CGATCATCCTCACTTACTTATGGTTTTCTTGTTCGTTCCTCAGTGGTTTATTTATCGAAG
ATATTTTCACAAGGTACTTTTTTGATGCGGTCCCATTTAGGGTTTCCAAAATTAATTCGA
ACCGTGATATGCTACCAGTCGAAAATTGTCAGAGATAAGTTCCTTTTTTGAAAAGAAAGA
TCGATGCAAGTCATCGGACGTGGTGGGGCAAATATACTGATTGATTATGGGGATCCTACG
TGGTTGTGGCGATGCTGCATCCGTTGGCCCGATCTGTTATCATCAAATAATTCTTATACA
ATCAAAAACATCAGTTATATTAAAGATTATGTAGAACCTCTTCTACATGGCTTGCTTTGC
CCGATGTATCTGATTGACGTCGATATAGAAGCTATAAGGCCAATTCTCAGTGACTTTATT
CTAAATTTAGACGATAAGGTAGTCAAAGTTATCAAAATTAAAAATCTCACCAATAATACC
TCAAATCTGATATTAAATAACCACTTTTTAAAATCTTATTGTTCACAAAATCTGCAAACA
GTTATTTTAGAATTGAAGCCTAAATGGTTATACTATGATACAGATTACTGTAGGAACTGT
ACTCATAATGCATTTAAGGGTAGAGGCACTAAGTACTGTTACAATCAATTACTAATGAAT
CCAGCACACTTGGAATTAATATTTGGAGAATGTACTATATTTCCGGTTAAGTTTAAAGCT
GTCATGCATGAGTACTTGCGCAATGACAATAACATTTTCAAGATCCTTTATGATTTACAG
AAAAAACTTACAAAGAACACAACTCCAATAAGCGACATAAAATCAATCAACGATGTAAAC
GATGAGCATCTGCTACTCATGACACTCAGAGACGTGACATGTTTCATTGAATGGAACAGT
GCTGAAAATGCGTTGCACGTGAATATAATAGATGTAGATCTAAAGCCAAAAGAAAAATGG
ACCCATTGGACAAAAACTTACAGCCAGTTGACATCAAGCCAAAAAATTTATCATACTTCA
AATAAATAAACTGTATACTTTTCTTTCCACCTTTGGTACTGGCAGATGCACATACATTAC
CATTTGTAAAATATATGGATAGATAAGTATTTTTTTTTTTTCTAGTGGCCCTCTGGAAAA
TGTAAATAATAAAACGGAAAACACACAAGCCAGGGTGAATGACCAAATTCGATATTCAAC
GAAGGGTCAAACCTTGAAACCTAGCATACATGAGTTTAAGGAATAGTGAGAAGAATAGTA
ATGGCCAAGAGACTGTTAGAATCAAGCCAAAATGATCAGGCCAGTCGAAAAAACTCAAAG
ATTGAGAAGAAAGAAGTATCGTTTTATGAGGAGGAAGAAACAGATGATTCTTTTGATAGT
TTTTACCAGGATGAAGAAGATAATTTAAGTGATGTTGATTGGGAAGAAGTTTCTTTAGAT
GGAAGCTTAACTGTCACATTTGGCAATATACGCAGAGACAGGGAGAAAGTAAGCAAGTAC
AAAAGAAAGCATAATAAAAAAGCATTCAATTATCAGCGACTTAAATATGGACTCCATTTG
ATAATGATTCCATTTATGTTATTTTTGTTAAAATCTAGGATGAAATGGATAGACGATGAA
AGACTAAATAGGCGACTAAGAAGGTCTGTACCAAAATTAATTGGCAAAAAATTCAAAGAT
TGGGATGTAAGGGATCCAGCTTTTAAAATGGATTCTTTAAGAACCCTTTTGCTTGGTTTG
GTCTTATGGTTCCGTTCCAATTACAAAATGAATAGCAATGGCATTAGACAGAATTTCAAC
AGGCTGCAATACCTTATCAAGTATGCCGATAACCAAAACGAAAATTCAATCTTTGAATCT
ACATATAAAAAAGTTCTTGAAAATCAACAAGAATTTTATGGAAATAGGCCGTTGATAAAT
CATGGTGTTGAAGATATTCGCAAGATGGCTAAAAGAAAAATGGCCAACAGAGATATTCTA
ACGTTGTTCTTCTTTATTATCTTAGAAAATGTGCTACCGGGGCCTAAGAAGCTTTACTTA
TGCTTTGCCTTGCCCTTGCACGATTACGATATTAGGTGCAATAAGGTGAAGTGGCAAATC
GAACATGGTATTGGCAAAGTTCGCAACAGATTTGACTCTGACCTAATACAACCTTATTTT
TGGATTGAATTAGAAGTTCCTACTTTGAGCGATGGTGAATTATACATCATTGACCCTATA
GCCCATCTGGGTGAACGTGAAATGGTCTTGAAAACACGCGAAGATCAGTTTGTCCCTACT
TATCAACCTTCGGTAGACATGAAGTACAACCTAAACCAAAAGTTTCATTATGTAGTCCGT
ATCAATCATGCTGAAAAGGTACTACAAGATGTTTCACCAAGATATGTGCCAAATGTTTGT
TACAGGTACTTTGAATTATCTGAGTCTTCTCCTATTTTGAAATCGAAGCATTACACTAGC
TACCAATATCTATCTAAGTGGTTGAAAGTCTTGAACAAGAAAAAAGCATCTGTTCATCAT
TACGCAATAATGAAAAAGATTGCTTTAACTAATTTTACATTACCAAAGAGTGTGACAGAG
ATTAAAAGAACAGATAATTTCGTGATTCCCTCTCTGTTAAAGTCTAATGAAGTATTAAAA
GCATGTGCAAAACAAGCCGCAACATTTACTAAGGGAGACAATTCGCAAGAGCCCATATTT
TGGAGAAGAGACGTCATTCAATTAAAGAGTAAACAGCACTGGGCAATATTAGGGCGTTCC
ATTCTACCTAATGCTCAACCATTAAAACGTAAAAAGTATCTACCGATGAGGGAAAGGATG
GTAAGAAACCTAGACAAGTACGTTATCAAAGAATTGTTTTCGTATGAGCAAACAATGAAG
TCTCCTAAATACCCCAGCACGTATTGCGATCATTTAGGACAGGAACATGTGATAACAGAT
TTGTCGCATTATAAAAATAAATTTGGCAACATCGAAATTTACTCGAAAGAAACTAAGCCT
GATGGATTTGAATTAATACCGCTTAGCAAAGAAGTTGATATTAAATGCCTGATAAAGGAG
TATAACAAAGGTAAAAGAAAGATGCAAAAAATCAAGTATTTGGATGTGGTAAGTGGATTT
GATTTTAAACAGAAAAAAGGCCATGCCATTCCGAAAATTGAAAGCATTCTAGTCAAAGAG
ACAGACTATAAAGCAGTCCAGCTTTTGAAGCAGCAAACTAAAGTACTACTGGGACTCTCG
TTCTGGGACATTCTATTAAGAAAGCTACGAGTTAACGATCGATTAAATGCTGAGTACGGT
AATGTTGGAAATAATGAAGAAACGTTGGACGACCATTGACTACATCGTATTTCACCTTTT
CTAAAGTAAAATGGATTCGACGCTGTTTCGCAGAGGGTATAAATGTTTGCACGATCGATA
GAGCGTATGGAAGCCTGTGCATAATCATATCTCTGGAGAAGGAAATCTTCGATAAGGGCC
AGTGAAATAGCGGAGTATCATGGAATCCGGGTAATGGGCATCGAAGCAGCTCACCGAAGA
GAAGAATAGAAAAGAAAAAGTAGAACTATTCTCGGGATTTATAGTAAACAGGGGACGGAC
GATTAAGAAATAACCTGATCAAACACTGTACACTACTGCTGTTTTTTTTTTTTTTTTTCT
GCTAGAAAAGAACATATGAAGAACTAAAGCGCATGGTTATTAAAGAGGACTGTATCAATA
ATCTTGCCAGGTGGCAGGCAGACGAGGAAGCTCACAGCTGTTTTCAATGCAAGACGAACT
TTTCGTTTCTCGTAAGAAGACACCATTGTAGGTGTTGTGGAAGGATATTTTGTTCGTCTT
GTACCGAAAATTTTGTTAATTATAATAAAAAGAGAGTCCATGCCTTGCAGAAAAAAAATA
GCGACGTGGAATCGCCTCCATATAGAACTTGTAATGAGTGCTACGATAACCTCCTTCATT
TAAATCTACTAGTATCCTCCACCAACAGAGATGTACGACTATCGCAAACTTCGGTACCAC
CAAATGCACTTGCACTTTCTGCACCAGATAGCAACACTGATGAAGACGCGGAAATCCTGG
AAGATTCGGTAGATCAATCCGGTACGGCATGCAGGAGCGAAGAAAGTTCACAAAACGAGG
AGGATCACTTCTGCCCTATTTGTAACTCAGATCTCACACAGTTTCCTGATGAAGAAGAGA
CCAGAAAGCACGTAGAGGATTGCATACAGAGAGCTGAAAATGCCCAACAACATACGAATA
CGTCAGATGCAGCAGATGACTCCGTAAAAGAAAGCCCTGCCTTTCAAAATAGAATGTTAG
TGTACAAGATATCGCCTAATACAACAGATAATGCAATTAAGGAGTGCCCGATTTGTTTTG
AGAATATGGAACCCGGTGAGAAAGTTGGGAGACTAGAATGCTTGTGTGTTTTCCATTATA
AGTGTATTAAGAACTGGTTTCACAAAAGGGCGCAAATGACTGCAGCCCAGAAGGGAAATG
GACATGCTTTTGTTAAAAGGAACTTTTGTCCTTTCCATGATGCCGTATTTTAACGATAAC
TCCCAATTTGCTTTTCATTACAAAGTTTAATTTTTCAGCTGTTAATAATCGAAGTTTTAA
CTTCCCTTTTCTTTTATTTTTTTCTTTAATTGTAAAAGATTTCTATATATTTGTTTAATT
ATGATCTTATATATTCATTAATATTTACTTTGAGGTGTTCCCTCACCTATGAATAAACAG
ACACTTCCTGGTTCTTTAAGTCCATCGGAGTCATGGCTACTATATGGATAGTGATGTTAC
GTACGGAGGATATATATACATATCGTGCATTATTCTACTTCACTGAATAAGTCACTATCC
AAATCCTCTGGTACATCACTATAATGCTCATCTTCACTCGATGAAGATCCATCATCGCTC
ATTGCACCATCTTTCCCTTGACCTTCACCCTGTTCTTCTGCTCTAGCTTTTCTTCTTTCC
AATTTACGTTGCTTTTTAGCATCTTTAACAGCCTTTTTTTTAGCAATGTTTTCTTCTTGT
TCCTTTCTTCTTTGTTCCTTCAGCCTCATTTTTGCAGCGTGTCTCTTTTCTAAGGCTTTG
ATTTCTTCGCTTGATTTTTGAACAAATTCATGATGTAATACTTTACCTGAACAAATACCA
TCTTCTATTTTGACCAGTTTTAGAGTTAATCTTGGTCCTAATTCAGTCAGTTTGATAGCC
TTCTTACGTGGAGTTGGTTGCGAATTTTCTGAAGGCTTAGGTTCCTCCATTTCCACATCT
TCTTCTTCAATTCCTTTTTCACGTTCTTCGTTATCTGTCATTTTAACGGGTGTTTTTTGC
GACAGCGAAGTTTGAGAATGTTTTGCCTTCACGTCCTGATTATCAACCACTCTCACAATA
GCGTCATCTTCAATTTCAGATTCTGATGTATAGGCGCCTAAGTCATGATCTAATATCAAA
GAAGAAATATCTTCTTTTCGATGCAAATTCGGCACTGTTTTACTTAGATTATTTTTGGCT
TTATAAAGCCTTTTTAGATTTCTAGAGATCTCTACTTCTCGAATGTCAATAAAATAGTGG
CGCATAGAAATTTCCCCCGTTTCTCTGTCTTTATTGATCATAAATATACGTTTGATAGAA
TTCAACGAAGTTCTTGCAGGATTCAGAGGTGGGAAAATATTCTGGAACATGGAAACAATA
ACCTTCTCCACGTTTACATCCTGATCGTCTTCATCAGATCTTTTCGATGTGGAAAACCCA
TTTAACACTAGCAATGGAGGATTTAATACATCATCATTATTTAACGATTTAGGTCTCTTC
AAAATTTTTTTGATATCTCTACCCAGTGAATAGTCCAATACTTGAAAAGTAACAGTAGGA
CCTTGTGGAGTTCTAGCTATCTTTAGCGAGACATTTCCTGTTTTTTCAGATTGAGTGAAC
ATGAAAAGATGCGTAACACCTAATGGGCCACACATAACAACAAAATCCTTCAGTTTATTG
GACTTGCGCTCTTTTAGTTTTACGGCCGTATGCGGTTGCATGATCTGGCGAAAATCCTTT
ACTAATTGGTTTAGAGAATGGTTAGCCAATGAAGTTTGTCCCACTCTGATTACCATGGAT
TTAGGAATATCTCGTTCCTGCTCGGGTGTGATCTGCGCATGCGTTCTCTTTTTCTGCCTT
CTTTTAGCCATTAGTTCCAAAATATCTAAGGTATGTGCGGGATGGTGACCTAGCAGCTGC
AATTTAGTCGAATATTAGCTAGACTAGTTTATTTTGCCTATTTAATATCATTCATACAAG
CCCGTCGATGAGATGCATCTACACTAAAAAATTGCAAAATCGTCCAAGATGATAGATAAT
GACTGAACTAACAGTCTGGAGTATTGCAAGTGCTTAGGTCTGTTTGGCAAAATTTTTGAA
AATATTACTGAACCATTAGCAAGCTGTAATAGAACTAAAGCACCATTACTGATTTATTTT
GACGAATCGTTTGCTAATTTTCAGCCACATCACATGCTGAAATATTTCCCGTTTGTTTCT
TGTTTGTTTCACAAGCCATTCGCGCGCGTTTTCACGTTAAATGTTTTATTTACACGCACG
GCTGCATCAGTGCAGCACAGCGTTAATCGAGTCCCGCGTTTTTCTATTGTTTACATAGAG
ACTAAAGACCAAAAAGGAAGAATACACACAATTAAGTTTTATGTAATATGTAACATGCAG
TAAATAGATGAAAAATATGAATGTAAAAAGTGGTAACAACTGGAGAGCCTTTATATTTCT
AGTTCGAATTGTTGTTATATTCGTTGAAGTACTCATCGTACTTATGAGTAGCCAAAGTAA
TGGAGTTCAAAACTGGCTTCAAATAGGCGGTACATGTGTTTGACATAGATTCACCATCAC
CATTAAGGACGTCTTGAAATAGCTCATTCAGCTTTTCAATACAGTCCTTCAAATGATTAT
AAAGTTTTTTGACGGTACTGGCTTGCTTTTGTTCACCGCTCTGAAAATGAATATAAAAGT
GCTTTAGAAATTCACAGCACGTTGTGTGTAGCATTCTACAACTTTCTAATAGGTCTATTG
GTAGGGTACTTTTCACCTCTAATTCATTTGCTTGAGAAGTGTTGTCGACAAAAGAGCCGA
GTGCTGAATTAACATTGTTATGCTTAGCCTGTTTGGCGTTAATCTTGATTGCAGTTATGA
CTCTTTTATTGATCTTGTTGCTGACTTCGTTGTTAGGAACTACTTGGTTCAAGTCTAGCC
TATTAATTAAATTATCCATGACCAATGACAACTGTTGTAACATTTGTTGATTAGAAACCT
TCAAATCTGCATTCTTTATCGAGTCTGCCGAGCTTTTCGCATCGTTGTCGGTTGTCTTTT
CATGTGCGTTCCTTTTCAGGTGTATGATTGCATAGTTTGTCTTGTAGCTTTCGTTTAAGT
CATCGATTTTCAGTTCATTTCTTTCATCATTATCTTCATCTTCCTCATCGTTTGTAATAT
TAGATTTGTTCTGTAGATTTGTCCTTGAATACTCATTCTTCAAAGCCATAATCATTTTTT
CACTCAATCTATTCATACCCTTTAAGATGTCCACGGTACCATCGCTATTACCATTAATAT
CCACACCTGGCTGCATAGTGAAGTCGGGCCTGTTGCCTCGTACAACTGGGTCGTCCTGTA
TGTTACCATCTAAATCTATAATTTTTTTCACAGGATGCAATAGCATGTCATCATCTTTTC
TGTCGAACTCTTGATCCAATGTCAAGTACCTGTCAATGATTACGTCACCTCTATCATTTT
GCATGATCTTTTCACCCCTTAATTTTCTGAATAACTTCGAAGAGAAGAACCTTGCCCAGA
ACTCTGGTTCTTTGAAATTTTTGGGCACATTATCAGTGTAAGCTTTCTTTACAATTGGAT
AGTTCTCAAAAATATTCAAAATTTTTTCTCTTGACAAATTAACATTGACTTTGTTTTCCG
ATGAAGCCACCGGCTTGATAGTTGACAAAACGTTGTAAGGCCCAACTTTTTGAGAAGTAG
ATAAGGCAAAAGCCCTCAATAACGGAATTCTAGTTGACCAAAATTCAGATGGAGGCAAAC
CGGCGTTAATGACTGTTTCCTGAAAAACCTTCATTAGAACTTTGTTTCCTTTCAGTAAAG
ATTGCTGTAGCTTTAAATTGGTCAACAATTTTTCTTTAGAGAGAGAATCATCTAGTTTGG
CTGTATTAATCAACGGAGCCCCATTATTCAATTGTGGTGTATCGAGATGTGGTGTGGGAG
TCCCTGCAGTAACAGAAGAAGAGCTCATTGGTGTTTCTGTGTGTTGCGCAGACTCCTCTC
TTCTTCTCTTTTCTTCGTAGATATCTGCATCTTTATACCGTGAGATGATTTGTTGAAGGG
TCATCTTGATATTATCCATAACTGTTCTATTGTTAAACGAAAACATATGACGTTGCGGTT
TGGGCACAACCTCATTTCCTTCGTTGTCTTTTCTCTTTTTTGACTCATCCACTTTCCCGA
TTAGCCTCAACATCATTTTTTCACTGGAAGCAGGGGTAGCTTGTAACTTGTCAATAGTGG
ATAAGACAACTGTGTGAACCTTGTCACCGTCCGTAGACCTCCATGTCAATTCTGCGGGTG
AAACATCCTCATTTATGGCAATTATCCCAGAAACTTTCTCAAAAATGGCAGCTCCGGAAT
GTGACATTATGGTTTACTTTTATTTTTTCCCTACCCCTACCCTAGGTTAAATATTATTAC
TTTCACTGGGAAAGCTTATTATGCTAAATTTCAGTATTGTCTAAAAATTGCGTCAAAAAC
GAGCAGCCTTATCATGTCCCACGGGTTGTGGCTTTTCTAGTTTACTGTCGAATCATACTA
TCATTTTTAAAGATTGGTTTCCATTTTCGTTAGACCGATATCCATTACTTACACTCCTTT
CATATCTTTCCCACGTGGCCTTAACTACGTTTACTAATACTTACTATGTAAGTCACAATT
TCCATTAATTTGCGTCGTTCAACAAGATAAATTGCTGTAATTATATGACTGCGACGCGAC
GGCGACGTCAAATTTTTTTTTTTTTTCCTGAATGGAAAAGGGAAAGGACAACAAATGATG
GCAAAATATTTCAGTTTGGATTCACAAGTTCTCCACTTGCATCCGCTATAGATAGCCACA
CTTGTTTCATTCAGCGCTTGTGATACCACGATTGTATCATTACTAGTGGCTTTAATTTTT
TTTTTTTTTTTCATCTATCCTTTTAATACCATTTGTGTTTGAAATAAACTGCTAAAAGAA
TTATACACAGGCATACTTTATCAAAAGTGTCAGCAAACAGAGCACAAGGGACTTGTTTAA
AGTAGCTAAGTATCATAAAAATTTAGTCGCTAGTGGTATTATTGAGATCAAACGAAAAGT
TTCATACATAATTAACAAAATTCGTTTGTTGCGGGGATGTCTGAGAACACCACAGCCCCT
TCTGATAACATAACCAATGAACAGAGACTTCCGTCTGGACCCAAAGATGACGTAGATACG
TTAGCACTTACCAGTGCTCAAAATCAAGCTAATAGTTTGAGGAAGCTAGATACAGATGCG
AACGCTAAAGCTTTGCCATCCATCACAGACATACCAGTCAGTGATGATTCTGATATAAAA
CGACAAGTTGGCTCTGGTTTTGGTTCAAATCCGCTTCATATAAAAGATTCCGAGGCCTTT
CCACATTCATCTATTGAAGCCCTAAAAGAGGGTATGGACAAAGTCACAAAACAATGCAAC
GATTTGAAGACGGCTTTGCTTTCCAAAGACACTTCCCTCACTGATTCTGTGCAGGATTTG
TTTAACTCATTAAAAGTTTTATCACACAACCAATCAGTTTTGGAAAATAAGCTGGATGAT
GTCATGAAGAATCAAGTAAATACTGACATATTGGTCAATAATTTGAATGAACGATTGAAC
AAATTATCGACAATGTTGCAAAATACTTCGAAAGTAAATCACTCTAACCTTCTCATAGAA
AATTCATCCAACAATACCAGTTCACAGCATAATACCTCTTCTTCTCGAAGGGGACCTGGC
AGGCCAAGAAAAGATGCCTCGACCTCCACAATGAATAAGTTAGTGTCAAACGCAGCCTCG
GTCAATCTTAAAAGTGCATCCAATCAGGGTGCTCCTCTCTCACCAGTAAATATTACTTTA
CCGACTGCCGTAGTACAAACGTCTAAATCCAAAAGGTATTTTGTGGAACCATCAACGAAA
CAAGAGTCGCTTTTATTATCTGCCCCTTCATCATCAAGAGATGATGCTGATATGTCCTTG
ACTTCCGTACCGCAAAGAACGAACAATGAAAATGGTAAAGAGCGACCATCCACTGCTAAT
TCTAGCTCCATCACACCAACACCTGTTACGCCGAACAACTTAATTCAAATCAAAAGAAAA
AGAGGCAGGCCCCCAAAAAAGAGAACAGTGGAAACAATGATATCCAATTCCACGGATACG
ATAGATAAGTCAGATGCATCCAATCGGATTAAAAACGAGATTCCAATAAATTCCTTGCTT
CCATCTTCCAAATTTCATCAAATACCATCATCTCCATCCAATCCTGTGTCACAACCGGCT
CCGGTTCGGACTTCAAGGTCAGCCACACAAGAAATAGACATTAAAAGTTTAGAACTGGCC
TCTCCAATTTCAACTAATGGTGATCCAAACGCAGAGGATTCGAATACTACTGATACTGTT
CATAATAACGTGGAAGGAAAGGTAAATGTTGAAGAAAATAAAACCGAGAAGGAGAAAATA
ATAACCATCAAATCATCCAGCGAAAATAGTGGTAATAATACGACCAATAATAATAATACT
GACAACGTCATTAAATTTTCAGCTAATTCAGATATCAATAGTGATATTCGCCGATTAATG
GTTAACGATCAGTTTTCATTAAGTTATGACGCCAGCGGTAATATTACGGTCAAATTACCA
CCCGTTTCCTCTCCAGCAGGAGCAACAGCTGCCGCTGCTGCGGCGGTTACGTCAGAGATG
AATAGACAACAAAGAGAATTAGATAAAAGACGTGATTCAAGGGAGAAAATGCTTGTTAAT
ATGAAATATAACGATCGCGATAAAGCAAAGTCATTTATGGAGTCTAATAAGAAACTCTTA
AAAGCAATGAAAGAAGAAGAGAGGAGGAAAAGAATGACTTCGATAATACATGATAATCAC
TTGAACTTAAATTTGAATGAGATCTCCACCCGTTCAAAGATAAAAAGTGCAGAAAAACCA
ACAACTAAAGGTTCTTCAATGTCGCCAAAACCAAGATCGGCCTCCATCAGCGGCATTTCA
GACCACCAACAGGAAGGATATCAACCATTAGAGCAAGAAAAACTCGTCGATATTGACAAT
GAGGGCTCAAACGCAAACAGCGACTCTCTCAAGATGGGTCTAACCATATCCGCTGCCGAT
ACGGTTCACAAAGTTGGAATACAGTCCATGCTAAATTCTGGGGAAGAGGCAATTACCAAG
GAGAATGCAGAATATGAAAGGAAGACCCCGGGAGATGAAGAAACTACCACATTCGTTCCA
TTAGAAAACTCACAACCTTTGGACACGATAAGGAAAAGAACAGCAGGCGATGACGGTGCA
TTGGATCAAACAGAGAATACGAGCATATCACCAAAGAAGAGACGCACAGAAGATCATATA
AAAGGTGAAGAAGATGAGGGAGAAAGGGGTGTTGGTAATAGCGGAACGCTGGCCACCGTG
GAGAATGTCTCAGGAGACATCTCCGCAGATTTATCTAAAAATACTCCATCTATCCATAAC
GATACTGAGTCTGCTAACGATAGTAGCAATGGCAACGGAAACCTCGGTTTGGGTACAGAG
TCACGCAATACATTGTTAACGGCAACTCCCATTGAATTAATCTGCCGGGAAGGCTTCTTC
TACCGGAGAGATATTCCGGACGTTCCCATTACCACAGGAGCGTACCTGGAATTTAAATTC
AAGGCGAAAGAAGAGGAATTGATCAACTCTAGCATCAATGAGGAGGATTATGCTGCTAAA
TCAAAGCATGAAAAAATGAATGCGCATTTCTTCAAGCCTGATATTCAAGAAGAGACGGAA
CTTGCCTTTGAAATTTTGAGCAAGACAACGCTGACAGAGAAATACGTTAACAGTTTGGAG
TACTTCTTGATGGAATTCAGGTGGGAGAATAAACTAGTTGGTCTAGGCTTAAAACTTCGG
GAATCCAAAAGAACCTGGCAAAGGAGAAAGGCGTTATTTGCCCTTTTCGAATTTTGGAGA
GACCAATCAAGAGACAAAAGAAGATTCCACAACTACACCATCCTGCATGCGGTGAAAGAG
ATGGAAAACTACAGAATATTTATTAATCGATCCGTTTCATGGTTCTACAACCATATTACC
CTGCTAAAAATGATCCTCTACGACCTCTGCGACAATGTGACCACTCAATGGAGAGAGTGG
ATGTTTCCCCATAACGAAACACTGCCGGCATTGGGTCAGGACGGCATTAACGAAGACAAT
CTGAATGAAACCATCGACAACATGTTAATTTTTGACTTCCTTGATGACGGTTCAGAAAAC
AACCAGGTCAAATATTCCAGAATCATACCGCCAGATATCCGTTAAGCTGGTCCGTACGTT
GGGGCAATTTCGAGAATAGATAAAAAAATGAAAAATAAAAAAAAATAAAAAAAACACAAA
ATAATGGACGGTTACTATGCCCAACCAAGCAACCTCCCAACTTATTTGGAACATTACATA
TTTAGCGCTTAACATTACATACACCTTTATCGACGAATTTGTAACTATTTCTTACTCTTG
CGCTGAGGAACGCCCCAGTCGTACAAAAGCACCTCTGCATACTAAGAAACTTAAACTATC
GCCATTGTCTCAAAATAGCAAAAAACGCAAAAAGCATACCGCTGGGCGCTTATCTATATT
AACCTACACGAGAAAAGAAACATGATTGACTGCGTCAGATTCAAAAACCTGCAAAGTTTG
TTTTTATAATTTTGGCGTTCAGCAAGCGCGCGGCTCCGCTCCATTAATATTCCAGAAAAA
GAAATTCCTTCTTTGGGTGTTGTGTATTGCTACTTTGGGCAGGCGCGACCGGGCCAAAAG
AATGCGGCACCCGGCAAAGACGCGTTCTGGCCCCTGAAGACTTAAGCACTGGAATGGCTC
CGAGGATTGGTCACCCAGAAACAGATGCAGACCAACCATTTCGAGATCTAGATGTTGCCT
ATTTCTCGAGGAAACGCTGCCGTTATCGCCATGTTTGGTGGAACAATTGTGAAACGTGAT
CAATTCGTGTTTGCAAGCTAGTGATCATTCGCATCCGAAAAAGAAACTGAAAATGTAAAA
CTCCAGTAAAACGAGACCTGTTGATGGATTGTTTCGTGTCTGGTATATATTATTGCTACT
GCTCAAGAGAGCTTCTTTTTTTATGCTATCGAACTCGATCTTTCGCTCCGAAACACCTAA
CACTAACAAAAGGAATACCTGACAGAATACGCTATCAAAAGAACGAATATGACTAGTGCA
AGTGTTACCAATACTGGAAACGAAACCATGAACCTTCCACAGATGCGGTCGATTTGGCTG
GATGAAGATGAAGAAGCTGAAAAACTCTACAGTCTGCAGGCCCAGCAATTCATGGGATCT
GATGATGAAGAAAACCTAGGCATTACTTTCATCAACAGCGATAAACCTGTGCTGAGTAAC
AAGAAAAACATTGAGTTGCCTCCACTTTCACCAAATTCACATCCGTCTTGCCACCACAGG
AGAAGTAATTCTAACTCTGCAAAGTCTAAAGAATCATCGTCATCATCGTCCAGCGCCAAC
AAGACAAATCACAAAAAGGTTTTCCTTAAGCTCAATTTGTTGAAGAAAAAGTTGCTTGGT
GCCCAACCGGACATAAGAGGTAAAGGTATCTCCACGCCATTTGATTTTCAACATATTTCA
CATGCTGACACTAGAAATGGATTCCAAGATGAGCAATTGCAGGAACCTTCATCGCTGTCC
ACAGAGATTAAGGACGACTATACCTCCTCCTCAAGCAAGCGGGATTCGAAATCACTAAAT
AAAGCTTTTGTCACTGAAAGGATCCCTGCTAATCGTGAAAGCAAACTCATTTCAAGATCG
CACGAAAATAAGACATCAAGACTATCAGTCGCGCGTTCGATCTCAGTAACGTCCTCCAAT
TACTCTAAAAACACACAAGGAAACAATCATTCCATTAATGGGAGAGTCGTATCTACGTCA
ACTATGGCTACATCTATTTTTGAGTATTCCCCAAACGCATCTCCAAAACAATTTAACAAT
AAGTCACACGCTCTGGGTCATAGATACACTAATTCCACGGATTCTAGTGAGTCTTCGCTG
GATTTTTTGAAGAACTACAACTTCCCCACACTACTTGAAGATAAGCCTATTTTAGACTTC
TTGCCTCGTTCTCAAAGGTCAAGCGCTTATCGTAGCCTTTTAGAGACCCCAAACTCAAAT
AAGGATTCAGCAAAAGCCTTCTTTCCTTCACGCCAAAGTCCTCTTCCCAAGAGAAGAAAC
TCTATAGCTACGCCTTCTCCACAATCTAAATTTTCCTACTCTGACTCCCCTGTAAACCAT
AGAAAATCTTTCGATGATGTTCTTTATTCTTTCAACCAGCTCGAGCCCCTGCAAACTTAA
GCTAAGGACAGAAAATGAAAAAAAAAAAAAAAAAAATTTAAAGAATCAGCTTATAAAACA
TATTCAAGGACCATCTGAAGTATCATTCATTCGTTTTTTACTCGTTAATCTCATTCATTC
GTTTCCTCATTCTTTTTTCTTTGTTCTTTATTTCGGCTATTTTTTTCACTATTAAAATAA
CTGGAGCTAACACTATTATTTCTTCTGCTTTAGTTACAAAACAAGGACATTCATTTAACT
TGGCGTTATCCCATACATTCGTTTATTATATCTTCTTTTAGGACACAATTTCTTTTACAG
TTAAACTTTTCTGTTTTATTATATATTACTTAAGATTGTTCATATAACTAACATTTATAT
GCTTATATGCGTGAAGTGCGCTTTAGTAAGAACATGTGGCTGTTTCTGTAGAAGCCTTGT
CTTTCTCTGTATTCCTTTAAAGGCCAACCGTACGTGCTTAATTACAAGCTTTGTTCGCAT
TGCAAGAAAGTTAGAAAAAAAATCAATTCTGAAAGATAATTATAATTCAAACGGTAAACC
ATTGGTTAAAAAGGAACATAACATTTCACTAGTTCAATACATTATATGCCCTTTAACAAT
GACAGATAGATTAACACAATTGCAGATATGTTTAGACCAAATGACGGAGCAATTCTGTGC
TACTTTAAACTACATAGATAAGAACCATGGTTTTGAACGATTGACCGTAAATGAACCTCA
GATGTCCGATAAACATGCCACAGTAGTACCTCCTGAGGAATTTTCTAGCACGATAGATGA
GCTATCCACGGACATTATACTTAAAACAAGACAGATAAACAAGCTTATTGACTCGTTACC
TGGTGTTGACGTTTCAGCTGAAGAGCAATTAAGGAAGATTGATATGTTGCAGAAAAAGCT
AGTTGAAGTGGAAGACGAAAAAATTGAGGCCATCAAAAAGAAGGAGAAACTTTTAAGGCA
CGTTGATTCTTTAATTGAAGATTTTGTAGATGGCATTGCAAACTCAAAAAAGAGCACATA
AACTTAAGTTTTACAAAGAAATTTGCGAACAGAGGACAGAAAATGTACTATAGTTATATG
GCAGAGTTAAGCGTATGTATGTTATTCTTATAAATAATTGTGCTACTCTATTTGTACCGG
AGAATTATTGGGGCAATGGGAGAAAAATCATAATGGAGAAAATCTTTCTACGAGTTGCTT
TGCAAGGAAATCTAACGATTCTAAAAGACACAATACACTAAAGAAAAAACTTTGGAAGTA
CAGTTTTTTCCCCAAGTTGAAGTGTGGACTCATTGTGAAGATGTAAAAATGTAAAAACCA
ACCGACAATACACTCCCAGCCAAATTCATTGTAGACCTCCCATTTGATAGAAAAGGAAGG
TTCAGCAGTTGTCCACGGATTCCAAGATATCATTCTCTTACATTGCACGCACATGAAAAT
GATCATCGAGAGTAAGGATCCATACCATGCAAAATTAAACCAAACTGGAGAGTCTGTGTC
TAACGTAATTGGCCATTTTTCCACGGCGAACGCATCTTCAAAAGTGACCTTATTTTTACC
GTATTTAATATAGTAATTGTACTTGTATTGTTTGAAAATATATTCTTTGAAAAGATAAAG
AAATTGTGACCAAGATAAGGTATGATTGAATTCTGCTGAAGAACTTATTTTGCCGATATA
ATATTCTATCATTGGGACTTGGAAATCGACTGGTAGTTGTACTGAGTCTATTAGAAAAGT
GGTTCTTGGTATTACTGGGTACTCCATACATAGGACTTCTTGCTCAAAGCGGCCCCATTC
AGGTAACCGAAGATCATGGCCCAATAGCCCACATCTCTGGCCGTTATTGTAAAAGCGTAT
CTCTGATTGAAGCGGTTTAATGTATTTATCATATGCGTTATCCTTTTTATCATTGTTGAT
TTCATCTTTAATCAGGAGAACATCCCATCTCTCATCCATTCCTCCCTCGTAGTTTGAATC
TTTCGTGCATGAAATTTGAAAGTCATAGTCCTGCTCACTGATGGGAGGTTTAGCAGTGCT
GGCTCTCAATAATTTTCCAGTAGATTTGTGTCTTAGTTTTATACTTTGACCAAATTCTAC
AGGTATCAATTGATCAGCATGGTATACCTCAGAAAAATTCAAATTTAATGTAGGATGTTC
TATTAACCATTCATTGTCTGCCGCGAATTCTTCAAATGATAACGCTACTAACTGTTCGTC
AACATCTGATGGATACGAAATATCGTGAGAAGCAAGATATCCGACCATAGAATCTAAATG
ACGTAATGTGATCGTTGATCCATAGTACAATCGACTCGGTTGAACTTGAGGGCCTCTTAA
ATAGGACTTGAAATATGTGCTCATATATTTTGAAAATTGTGGCGTGTCTGTCTTAAAATT
CGAAAGTAAGTTCGAATAACTTATTATGAAGATGGAACCAGGGATAATCAAAACGAATAA
TAGACAGAGAATGACAAATTTTATTATTTGGATGGTCGTAACTTTAACGTCGCTTATCAG
TCTATCAAATTGACGTACAAAAGAAAGAATTACGAAGGCCCAAGTGACAATTCCAATAAA
TTTAGAAGAGATTGCCAGCCCTAAAGAAATAGATAATGTAATCACATTAGCAAACCAATT
CGTAGTTCCCAGTTTTGCAATTGAAATGCTTATAAAACTGTAAATTACTACTGAGAACAG
ACACCATTCTAAACTGTCAAATGATATAATAGTGCCCTCATTCCTGAAAGTTTCCCAGTT
GGATAATATCAGCAAACCTGTTGCTGAAATTAAACGAGAGCAATTGATTCTCCTTGTTAT
CAGGAAAAGAAAACCTAAAGTCGATGAATTCAAAAACAAAGAAACGTATCTTAAATTTTC
TGCGATCTTTAATCTTCGAATAATGGAATAGAACTGTATTGTAAATGGTGGCAATTCATG
GATGTAAAAAGCCTTGTCTAGGTAAAACTGAATTAATTGGGAAAGTTCTTGTTCACTATT
ATTGTCCCATGGCCGGTTCCAGAATGAAGAAGAGTGCGATTTCCATATTAATGTGAAATT
GGTAATAACAATCAAAAACGCGAAAATATAATCAAGCGTATTTAAGTGACCAATTCCACA
TTGTTGGAAAATATTATAGGGAATGTACTTTCTGTAGGGCCCCTGTAATCTCAAGTCCTT
CATGTTTTGTGAGTTAATTTTTTTCTGTTCAAACACTATCGCCCTTAAGTGTCTATGTTC
TTATTCTCCTTAAATAATAACATTTTTAGTATTCGATTTTCTATTTTTCCTTTCTTCATT
ACTTCATTACCAAAGTAAGAGTGGCCGATGTAGGAAGCAATATTGAAAGGAAGGGAAGGG
GAGCACAATGAAACAAACGGTTAGTGTGATGAAAACGACAGGAAGTAACTATAAGAAGCA
GTAAAGTTGAGACTTGCTGCACCATTTTTATCGCCTCACCTTTATTAGTTTTTTATGCAT
CCTAAGTTGTCATCCGTAATATTGTTCCAATAGTGTAGCGGCTATCACGTTGCCTTCACA
CGGCAAAGGTCCCGAGTTCGATCCTCGGTTGGAACATTTATTTTTTTCACTACTACTATA
TTTTTAGTTGAATCCTAGGCCACATTTAATTGACTAATAGACTTAAGATCGAGATTAGTA
ATCTTCTGACTTTTTTCTACTGTGTAATAGTTGAATGATAGCCTCTATTTTATTGTTAAA
ACCCTGCGGCCGGGTTACCTCTTCATGAGGGGTAAGGGCTGTCAATACAAGATGTGTCTA
GTATTGAGAGTAATATGACGGCATCGTCAAGATTTGTACATCGACAAACATGTGCAACAG
CTCTAACACATAATCATATCAACCACAGTACTCAGTAATGGCAAACAAATCACGACCCAA
GAAAATCAAGGCTCCTTACAGGAAGTACGTGGCGGGAGAGGGTTTCTCCTCTACAAGAAA
TGATAATAAAGCTAAAGAATTCACTATCACTATACCGGAGGATGCAGAACTCATTGAGAC
TCCACAGGGGTCTTATTACTATGATGAAACCAATGATACTATAGTGAAATTGACACGACT
GAGTAATGAAAAAAAGGATAAAAAAGGACGTAAGCAGTCGCTATCGTCATCATCGACATC
GTCCTCCAAAGAAGAAAAGAATGGCAAAGCCATAGAGAGTGAGGAAGCGAGGATGCATTC
AGTATCGGTAAAGATGGTTTTGCCATGGGAGATACAGCATAGAATAATTCATTATCTTGA
TATACCAGAGAACGAAGAAAAATTAAATAAAACTACTAATGGAAAAAAAACCACGACTGG
TATAAATATGAACTACTTACTAGTTTGCAGGAACTGGTACGCCATGTGTCTACCAAAGCT
TTATTATGCACCAGCGTTAACAAGTAAGAACTTCAACGAGTTTGTTGATACAATAATCAT
AAATAAAAAGAAGAATTTAGGACACTATGTTTTTGAGTTGAACTTGTCTACAATTTTACA
AAGTGGTAGAAATTCATTTGTCTCCAAGCTTTTACGACGATGCTGTTCTAACCTAACTAA
ATTCATCGCACCACAGACAAGCTTTGGTTACGCGCCTTTGATTTCATTGAAATCGTGTCA
TGATTTGAAATTTTTAGACTTGGGTTTAGTATCGGAAACAGTTAAGCTGAAGGAGTTATT
TTCTGCCATTAAAAATTTCACTAAATTAACGCATTTATCTTTTCCCAGATCGTCGATTGA
CTGCCAAGGGTTCCAAGATATTCAATGGCCACAGAATCTCAGGTACTTGAAATTGAGTGG
AGGTATAACAAATGAATTTGTGATTGATACGAAATGGCCAACAACTATTACAACTTTAGA
ATTCTCTTATTGTCCTCAAATAACGGAATTGTCTATTTATTCGTTGTTATCACAGATCGG
TGATAATTTAAAGCATTTATTTTTTCATTATCCGATGCCATCTCTGGCAGAAAATTCCCT
AGACCATGTCTTCACGTACTGTGCTAATTTAATTTCTTTGCAGCTCATGGTTGATTACTG
TTCTAAGTGGTGCTTTTCTGAATTCATGCTAAGTAAATTGGTGGAATATGATAGGCCTCT
TAAAACATTGTATTTAGAATGCAGCGGATCCTTGGGATTAGCTTCTAAGATTCATCCCGA
TGACTTGACTATAGCCATACTGGAATCCAGGCTGCCCTGCCTAAAGAATATTTGTGTTTC
TCCCAAGCTGGGGTGGAACATGAAAAGCGATGAAGTCGCTGATTTGGTAGTCTCTTTGGA
AGATCAAGATGGCAGTTTATATCTTAATTATTAAAATGTTCATTGTTTGTTTTATAAGAG
TCAGTGTTTTCTTTTAGACACTATTAGGAAGAATTAGTTTTATCCGGCCTAAAAAGAATT
TTCTACACGCAAACTTGCATATATTTTGCCATCGACACCAATTAGAATGTGTAATTTTCC
TAGTTTATACGTTTCTCAAGATATGGTCGAATCTTCTTTTCTGCTCAATTGTAAGAAGCG
AAGAAAAAAAGGAAGCTCCATTGATCTATCTTGGGCTCAGAATGATCTTAGGCAAAACAA
AGAAACCTAAAAGCATGAATAAGCCAATATATTTCAGCAAGTTTCTTGTAACTGAACAAG
TTTTCTATGTATGCACTCTCATATGTTTTTTTGTACCCCATTCGCACCATTGCGTTACTA
ACTATATGGAGACCTTATAATCTCTGCTTCTTTACAGAAGTCAAAATATACGTATGCATT
GGTAAACTTGAAACCAATTGTACCCGGACATGTACTGATCGTTCCACTGAGAACTACGGT
TTTAAACTTATCAGATCTGACCATGCCTGAATCTCAAGATTATTTCAAGACTTTACAGTT
AATACATAGATTTATTAAGTGGCAATATAAGGCTGACTCTATCAACGTTGCCATCCAAGA
TGGACCTGAGGCCGGACAGTCGGTACCCCACTTGCATACACACATTATTCCACGTTATAA
AATAAACAATGTAGGGGATTTAATATACGATAAATTAGATCATTGGGATGGTAATGGGAC
TTTGACTGATTGGCAAGGAAGAAGAGACGAATATTTGGGTGTTGGTGGTAGGCAAGCAAG
AAAAAATAACTCTACATCGGCCACTGTAGACGGGGATGAACTCTCACAAGGTCCTAATGT
CTTGAAGCCAGACAGTCAAAGGAAGGTTCGAGCTTTAACCGAAATGAAAAAAGAAGCTGA
GGATCTTCAAGCCAGACTAGAAGAATTTGTATCTTCTGATCCTGGTTTAACACAATGGTT
ATAGTTCAATAAATAATAGATTCATACTTACGATATAAAAAATAGTAGGGAAGTTAATTT
TCGTTTCGCAGCGAATCCCTTTTAGCAGAGGAAAAAAAAGATGAAACCATCCTTACTACT
TTCCTCGAGGAGACTCAACAGTAAAGGTTACTTTCAATTCAATAAACAAAAGGCACAGCG
ATATCCGCAATTATGAAGCTTCAATTTTTTTCCTTTATTACCTTATTTGCTTGTCTCTTC
ACAACAGCCATTTTTGCGAAAGAGGACACGGCAGAAGATCCTGAGATCACACACAAGGTC
TACTTTGACATTAATCACGGTGATAAACAAATTGGTAGAATTGTTATGGGATTGTATGGT
CTCACCACACCCCAAACCGTTGAAAACTTTTACCAGTTGACCATTTCCAGGGACCCTAAG
ATGGGTTATTTGAACTCTATCTTCCATCGCGTTATTCCTAACTTCATGATTCAAGGTGGC
GATTTCACTCACAGATCAGGTATTGGGGGTAAGTCTATCTTCGGAAACACGTTCAAAGAT
GAGAATTTTGATGTCAAACATGACAAACCAGGCAGATTGTCTATGGCCAATCGTGGTAAA
AACACCAACGGATCCCAATTTTTCATCACCACCGTCCCATGCCCATGGTTGGACGGTAAG
CACGTTGTCTTTGGAGAAGTCTTGGATGGTATGGACGTAGTTCACTACATTGAAAACGTT
AAGACCGACAGTAGAAATATGCCTGTAAAGGAAGTTATTATTGTGGAAAGTGGTGAACTG
GAAACTGTTCCTTTGGACAATAAAGACGCCGCCAAGCTACAGGAAGAGATCAAAGCGGAA
GCTAGCGAAGCAGCCCACGATGAACTCTAAACTGCATCACTATTCAGGAGATGTATAGGC
CAGCTATGTAACTATATAGTGCTTATAACAGTTGATTATCACATAGAACGAGTATGTTAC
CCTATGGCCCTTTTCTGGCACAACTTCACAAGAGTATTTCAATTGACCAACGTGGGTCTT
GTTGACCAGCTGGGATCACACAGACCAAGAACTACCTTTATTATTAGGAACATACTGCTT
TCTGGACACTTCCACTGCTATACCTTCTCGCAAATAGCCATAGTTCACCAATATTCATTC
GGCCCGTTAGACGCTTGTAAGACCACTTTCCCGTTTTCGCCCGAGAAGATACATTAGCTG
CTTACATTAGATTATTTCATCAAAACTCACGGCTTTCAAACCAAAGTCATTGGTGCTCTG
CTGCAATTGCCCCATACTACGCAGATATTTAAAATCGAGGTTTCTGTGATATTTTCTTAA
GCTCTTATCTACAAAAATAGCATTTTAGAACCAAAAAACAACGATGGATATTCGTGGTAG
AAAAATGAAAAAACCGCCTGCATGCGTGCAGTGCCGTAAGAGGAAGATAGGCTGCGATCG
TGTTAAGCCGATTTGTGGGAACTGTATGAAGCATAATAAAATGGACTGCTTTTATCCGGA
CGTTCCCGGACAATACGTTCCCTCTAGTTCTTCCTCTTCCAATACACGCCAAGTAGCCAA
CGGTCCGTACTTAAACTCTTATTACGCTTCTCGTCGTGTCTCCAAGGAAACTGCTGTACT
TTTGCAGAAAAATCCAGAACTGGCTTCTTTGGAGCAAATAAGAGAATACAACACGCGTCT
GCAACTGCTCAATGCTCAAAATCAACTTAATAATAGATCATCTGCGGCAAATGCAACCTT
GAATCAACAACACACTCAATATATTCCAAAATCAGTGCCTTCCTTGGAAAGTAAGCCAGT
CACTTCTGCAAACGAATCTTCTACTCCACTCAATTGGGTTCAAGGCCCTGCAATTTTTCA
TATGCTAACCTCTCCTTACACACAAGATGAAATCATCAATCATGAAATGAATTTCTTGAA
AGGCAGACTACTGGAATTGCAAGAAATTACAGGTAAGAAAATTACGGGAGTAAATCTTGA
TCTCAAGCAGGATTCCTCAGCGCAAATGCAGTCTTCACACTCCAATAGAAACCAAGAGGA
GTTTTTGACAATTAAGAAAAGAAAACTGAGTGAAGACGGCGTTACGGACGGGGACGGTAA
GCCAATTCCAGAGAGTGAAAGAAGACCTCATCTTAATGAATTTAAGGATTTAGATCCTCA
ATTTTTGGATACTAATAAAGTTTTTAATGTGTTTAATTCTGCTATTTCAGAAGAAGGTAG
AAACAGATTATGGCTGTTACCAAAAAATATAAATAAAAGTTCTATCTTCCAGATTCAGTA
TTTGATTGAACGTGATCCTTTCCTATTCAAATTCTTCAATGACTTGAATATATTAATTGA
AACGCAATTTAATGGACCTTTGCACGATTTGGTAGCAAGCCGTAACAGTATTGAGCGCAA
CAGTGGCATATCTCAAATATTAAAGTTTCCTTCACAATCGATAACACAGACCCTTATCAA
CAAATACTTATCCACGATAACGGAAACGAATTCAATACTTCCAATATTAAAACCAAAGAG
ACTATTACCCATAGTTGAGCAGCTTTTTCCTTCTAACACCATTAATAAGCCAAATTCTAA
AGATTTTGAAACTATTTTTCAAGTTTTCAGTGTGACCAATGATCAGCTACTAAATCTAGG
ATTTATTACTCTCTGTCTCCTGATTCTTTTTGAATCGTTGAATTCTACGGTTTTGATTCC
TCTTAGAGATGATGAACACTTGCAATTATTCAATGTGTTATTCAACTACTTGCCTTCGTT
GAAGTCTAATTTAACAACGCTTAGATTTGAAATTGAAAAAAGGTCAATGTGTAATATAGA
GACCCTGCGGTTTATTTCTTTGTGGAAATATTACCAATTTGTGATGGACACGTCGTCTTC
GTCCTCTTTCGTAATTGATTACGACGAAGATATGCATATGGCATGTTTACTATCGTTAAA
TCATGAAACTCAAAATCAATCTCATATTTTGACCTGGAATTTCATATTTAAGAACTACTG
CTGGAGACACCTTTTCTTAGGTCAATTGCCGTTGCTAATGTCTGAACCTTTCACAAATTC
TACCCCAATTATTGATCCTTTGTTGAACAACGATTTTGAATTGATTGATTTTGAAGTAAA
CTTGATGAAATATTTGCAAAGTAAAGATCAACAACTATCCATTGATAAAATTATACAGTT
AATCAAGCTTTTGAAAAATAAGAATATCGAGGTCAGCCAAGGATGTTTAACGACTCCTTC
AATAATTAATAATATTATGGATTCTCTAATCTACAGGAATTCAATGTTATATTTGAACTT
TTACCTCTTATTGCAATTTGAGACATTGAAAAATTATGCTAAATTTAACGAAATTTTGGA
AGACTTTTTGGAGTTGTCGAGGGAGACCTTGTTCTTTGTTTTCTCGAACTTAGCCAATAT
TAAATTTGCTGGTCATGAATTCACATTCATCAATAAATCTATTGTGGTTCTGCAAACTTT
AGTTTTAATGCTTTTGGCGCTCTATCAAAGGTCTTTTGATTCTTCAAAGAGGACGAATGA
TGCTAATGAAATCAGTGAGCAAACAGATATTCATAGTAATAACGACAATAGTAAGAGAAT
AAAGAATAAAAATGTTATTCATTTAATTATCAACAAAATTGCAATGTTGTTAAGTGATTA
TACCAAGAATTGTAAAAAGCAAAATAAACTCATCGAAAATCTGATTATTAAAATTAAGAC
AATCTCCAAGTATATCAAAAATCTTGAGGAGAATAAGGTAACGACTAGCGCCGATTCAAA
GTATTCCATTAATAACGGATTTTCTGGCATATCTGCAGAGCAGTTGATTAAATTAAATCA
CGAGTTGAGTAAAATTTCAGAATCTCTGATAAAAACGGATTTTTATGAACAGAGGAAAAA
TAGCACAGTTTCTAATGGAGTTTTAGGCGCTGCAGCTCCTGTTGATAGCGACGCAAATTC
GGATACTTTCGGTTTAACAAAGGAGAATTTCAACGAAGTTTTTGAGGCTATTCGTAGCTA
AAGCGACTCAAACAAATTAAAGAAGAAGTTGAGACTTTTATAGTATTTATTATTTAATCT
GAGGATTTGTATTATTTTTTTATATAGAATGAATAAATCAGAAAAAGGAAATTATGAAAA
GAAAGGAATGAGGAGAGTGGGAGATATTTAATGTTGTTAGCTATTTATCTGTATGGAAGT
TATTATCTTCTTTTAAGATGGTACAAATAGCATATAGGTGGGTTTGGTATAAAGATCATT
TAGTTTTTGTCATAGATTTTTCAATTGTGTATAGGACCAGTTTATGTTACCTCTATCATA
CTTATATTTTTTTATATACAAATTTTTAAATTACCGATATTATATATAGGCACCGATAGT
ATAGCCCACCAAAGCGCCCAAATAACCTCCAACAACAATAGGAATTGGCCAATTCTGCCA
ATCTCTATCCCAATCCAAAGGAATGACAACACAACTAATCCAACCCCCTACAACGATAAA
GATAAAATACTTCTTCCATAATCCCACTTTGAAATCACAATTAAATACAGAATAAACCGC
AGGGTATGCTAAAAATGCAAAATGCAGAGACAACAGCCAGGTTTCCCACAATAAGTCCAT
TAATGGCGCACCAAATAATATAGTTAATAACATTGTGGGAAAGCTCAACAAAAATGTAAC
ACCTAGACAAATAATGGTCAATGAGTAATTGATCTTAATGATTTTGTTACCGTAAACTGT
GCATTTATTGAATTGTAAAACTAAATAAGCAACTTGTGTAGGAATCAAAAAACTTAGCAA
CTTCACCGTATTGAAATTTGAAGATACAAAAACGTAGTAATAAAGTAGTGCTACTAAATG
GTATGGAAATGTCATCAGAGGGGTTTTCCTCACATACACAGGTGGACGATCATGATCTAC
GTTCTTTTTCTCACGATTTTGGTGCGTTGTTAATGTTGTGTCATCAGAGAATGATACGGT
TTTTTTCACTGTCTTTCTAGTCCTTTTTTTAGCTGGCATATTTAAATTGGACCTTCTTTA
GTGCACTTGTTTATGTTCCTGCAAAGTCTTTGATTAAAGGCACCGTTTGCACTTTTGCTT
TATTTCACTAACTGTTCTTTATTTGTTTTTTTTTGCTGTGCAAAAAGTAACTTTTTCCTC
ATCCCCGCGTTACGTAAATAGTTCCGAAAATGTACGATGATACATGCGTTATTGTTACAA
ATCTAGTGTTTCAAGTAGTGGTTCTTATTCACTACTCGAATGCCTAGTGATAGATAGATG
TATATATCGGGCTAGTTAGCATTAAATATCCTTTATATGTATTGTTCACTTACCCTGGCA
TAAAGATCTCATTGAAAATTCAATATTTATGATATCTCTCCATGCTTCAAAATGCGCATG
TCTTCCTGCTTTCTGCGCAATGCTTTTCCGTCTATCAATAGCTAATCCACAGAACCTCCG
TATAACGTTGAAATCAAGCATAGGCCTCATAGAGTGACCCATCTGATAAAAGTCGTTGGC
CAATCTTTCCATGCGAGGGTTTAAACCACCTAGCTGTAATTCTCGATCGATGATTTGTTG
TTGAATCACATAAAGTCTTCTGTATTTCTCCTCACTTAAAGGAACTATCTTGAAGACTGA
CCCATCCACTTGGCCACCAACGTTTTGAAACGATGGCACTTGAGGAGAGCCAAATTCCTC
GTTTCTTGGTAAAAGCATCATACAACTATTGGTGGAATGCAACGTGAAACTGGAGCAGTG
GACTAAACGTTGACCCGAAAGAGAGTTGGGTTCATCTGGCGCATATTTTAAAACATGAAC
ATTTCTGTCAGCATCTGTTGCCGCAAAATACATATCCCCTCCGTTCACTAAAAACTCTAG
CGACATTGTTTGAAATTTCGACATACTTCTACCCAATGAAATCATCCTGTATGGTTCTGC
GTCAAAACCAATAAATTGGAACCCCTGCATAGCGTCACCAATTATCAAAAGATTACCAAA
GCTTTTAGAATCCGTAACGAAAACAGGAATATCCAAAAATGCCACTGGTATGACGGAATT
ATCTTCTTGGATATCTCTTACTAGAACTTTTTGGCTTTGACTAATCATGAATCTTCCACT
AACCTCACAAACAGTAGATACAGTACCACTGACCTCTTCTTGAAAAATTTCCTTGAGCTT
ATAATTGGTATCAGGTTTACCAGGTTCGGGAACAACTTCTATCACATCATAAATATGGAA
AGCGCCAGTTGGTGGAGTGTCTTCAGTGGTGGCATTGGCAACACCGGCTATAATGTATTC
TCTTTTCCTCTTAGTTTTTGAATTAATTTGAATCATAGAGGATCTCATTTCATTGACGAC
AGAATTCTTTGGAAAGTCAATTTTATCAATGACCTTCCAACTTTTTGGATTAATGAGTAA
AATTCCACTTTGAAATCCTTCCGCATGAGGAACATTCTCGTCATAACCAATTACTTTTTC
GCCATCTTCTCCTAATGCTTCGTAAGGAACCCGCTTGCAATAAGATACAAGAAACAATTG
AGCCCTTTCATGATAGACTAACTTTTGCAGAGTTTTGTAGTCATCAAGCACGTTGCTGAT
CTTTATCTGTTTCAATGGTAATTTGTTACCATAGTACATATTGTCAGTAGTTAGTGTGTA
AACTCTGGCGTTTTTAATATCATCTACACACATGACTGAACGCTCGCTCCAGGGAGTGAC
TGAAACCAATGGTATGTTTCCGAATTTGAAAATCTTCGGTGTGGAATCATCTTCTTTTAT
TAATATGTATGGAACGCTACCGGTTACAAATATTACCGAATAACCGTTGTAATCGGGAAA
GTAATGCATGATTCTTTCGATGGAACTAACACCCTTGGCGTATGCATTGTCAGGAGCACC
AGTAATAGCTAGATCATTTCTTGTAACGTTTCTATAAAATCTACTACGTCTTTGTGGTAA
TTTTCTATATTGGTAAATCTCTCCTCCGAAGGTTAATATTGTCAGGTATTCTTCTTTATT
GTCATGGCCCAGTTTGTTTATCATTACTTGTTTAATCGACGGATCAGGGACGATCTCATC
GCCCAGTTGATAAGTGCTAATGTATAAAGATTCATTTAATTGGTCAACACCATTTAGTTG
AAAGATTCTGTCATTATGGTCTTTAGTAAAAAAGATAATTTGGTTATCTGCAGTAACAAA
TGTAAACAATAACTGTTCTTCTTGAGACTTACTCAACCCAATCAAAAATTCATTACACAT
ATTGCTTTTCAAAATCAAACCAGATGTAATAACCATTTCATTCAAAATTTCTGGCAAATC
AACTTTTAACAATTTTCTTTTATTCTTTTCCTCCAATTCAAATATCTTAATATCACCCCT
TGATACGGTAACTAGTATATACGGATCCATGACGGAAACATGAATAACTTCGTAGTCAAA
TTTAATTGTGGTGAGACGTCTAAAATGTGTATCATATAAATATAAGTGATTGGTGGTGAC
TTGTATTATCCTTTTTTCTTCACCAAACATTGAAATGTAAACTGTAGTAGCATCTCTTCT
TAAACGGCCGCCCTTATGAAGTTTGAAGTTATTGTCACTTTCATATATGTCACTCCGGGA
TTTTGTGGAATCAGTAGTTATTAAGTACCTATCTCTTCCTTTGATCTTAAGATTCCAGAT
TTGTGTTATACTGATAAATTTCAATGCTAATTCAATTTCCGGTTGAACACTAGTCTGTAT
GACGGTCAAATGAGAACCTGAACCATTTCCCGATGTGGCAACTAGCGAATACTCGTTTTT
GTTTGGATTTGGTAGTCCTTTTACCACATCATCAATGGAAGATACCTTACCTACAGTTAA
CGATGTGATGGGACCAACATTCCTTAGAGATGATAACAGTTCGATATCGAAAGGTTGAAC
AGTTTCCACAGTGCCTTTGGAATCATTAGTCGTTAGTCCATTTTCAGGAGCTTCATCGGC
GTATAAATCGTCCATTTCCTCATCATCGTCGTCATTGATATCCATCAAACTATTTGTACC
TGAAGATGGATTGTGTGCTTCTCTTGTTTCAATGGTAGATTTCAAATTATTCAATCTGAG
AACCAAAGCATTTCCTGAACCAAACCCAATAAATAAGTCCATATTTTTGTTTGAATTGGT
GGCATTCAAACGTGTTATACATTTTGGATTGGAGTTCTCCTTCAAAAGATCATTGACTAT
AGGTAGCTTGAAAATATCGAATTTAATCAGTAACCTGCCCTCTGCTTCCATTTGGATATA
GTATATATTGGATTTCAAGTCCATAAGTAGTAGTGTTTCGTCATTATTACTTCCTCCGTT
TTTGCTCTTGGACGAAGGTATCCAAATTGACGTAGTGTTTTTCTCCCTGAACATAATTTC
CAATGAAGAATTGTTGATAATTTTTGTTTTCTGTAACTCTTTATCAGCAAATGAGTTTAA
TAATATTGTCGATTGTAAAACGCCAGTATTATCTAGAAATGCCAGTTCATTGGTTCCCAC
AATGATAGCACCATTCGAAACAGGTACAATGGTGTGTAGATCCCAAGGCAGTTCCTTCAC
AAATGCTATTGTGGTTGATTCAATCTTGGTGGCACTTTCTGCAGGCTGGATATTTAATGT
GAGTATAACGTATTGTGTAGGGAGTTTTGAAATGGTGGTGTTTCCTGCCCAAACAAGCTT
TGGTTGGTATAAGAGCGCTATCGTTGGTTTAGTAAAATTTTTCAAGAACTGAATATCTAT
GATATTTTTGGCGCCTTCGTACAACTCACTCGCTACCAATACCACGCTTGGAGCCGTGAA
CTTGTCACCTAACTTGGTTCTCTTCCTCTTATTGAAAGTATTCGTCCCTTGGGATTTTTG
ATTCATGCTATGGATTAATTCACTATCGTCTATGTTCTCGTCCTCATCTTCTTCCTCCTC
ATCGTCGTCATTTTTATTGACATGGAAGGGTAGAAAAGCGATAATGTCATTATTGAACAG
TAAGGCACAAGAACTTCCAGGATCCATTCTCAAGGTGGAAATTTTGGCCAGCTCTACCAA
CGATTTACCCTTGAACTTTCCTTCGTAGTAATGCAGGCTTAGGGTATCGATTGAGTTTGT
TAGCGTGTTGAACTTTAAAATAGAGATTTTAGCGACGCCTGTGCATAAAAGCAGGCAACT
TAACGGACTGTCTTTTTGGGGAATGAGGCCTATATCGGTGATCAAGCCATGAAACTTAAA
CTCATCAGTCAAATACAGTTTACCATCCCTAGTAGGCCTGTAGACAGAAAGGATATTTGT
TCGCACCACTAAGAGCTCCTCATAATCTGAAGTAGTAAAATGTGTTGCTAATGAATGAGA
CACAACAGTAGCGTCAAGCACATCATCATATACATTCATAGGGCCAGTAGCTAGAGTAAA
AAGCGAATCTAGGTTAGTATCTGATAGTTTTAATCAGTGAAGTGTTCAAGGGACGGTGAT
CTTCCTCAATTTACATATGATTGCTTTAACGCTGCTCTGTGAAATATGTCACCTCGAACT
TACCTTATATTAAGATCACTTACTACGTTGTCTTATTAGAAGCCGACGGGATGAGGAAGC
ACAAAATGTCACTAATAGGGCTGGTCAGTGGCACAGTGAATCATAATATATCGGTTGAGC
ACCAGTTAAAGTATGAACATGTTAAATTTAAGACTCTCGCTTATCAATGGTTACATTTTC
GTCTAAATTTATTTATTTATGATACTATCAGGTACCTTGGTAAAGGAATTGAAAATAAAT
AGCACCCACACATCGCATAATGGCAGGAAATGAAAAATTACATCAGCGAACTAATGCTTT
CTCGATGAATTATTCATCCATCAAAACGGTCTTTCAAGATTGATGTCTAGTTGCTTCAAA
GATAGGCATAGTTTAGGTCATTTTATCAGCTACTGTAATATAGTCATAAGAACGCGAAAA
TGAAGGATGCTAATGAGAGTAAATCGTATACTATAGTGATCAAATTAGGCTCTTCATCGC
TAGTAGATGAAAAAACCAAAGAACCTAAGTTAGCTATCATGTCGCTTATTGTCGAAACTG
TAGTCAAATTGAGAAGAATGGGACACAAAGTTATCATCGTGTCCAGTGGTGGTATTGCTG
TTGGTTTGAGGACTATGCGTATGAATAAAAGACCAAAACATTTAGCAGAAGTTCAGGCCA
TCGCAGCTATTGGGCAGGGTAGATTGATCGGGAGATGGGATCTTCTGTTTTCGCAATTTG
ATCAACGTATCGCTCAAATTCTATTGACCAGAAATGATATTCTGGACTGGACCCAATATA
AGAACGCTCAAAACACAATTAATGAATTGTTGAACATGGGCGTTATTCCCATTGTGAATG
AAAACGACACACTATCTGTTAGAGAAATCAAATTTGGTGACAATGACACTTTATCAGCAA
TTACTTCTGCTTTAATCCATGCAGATTATCTTTTCTTACTGACAGATGTTGACTGTTTGT
ATACTGATAATCCAAGGACAAACCCAGATGCCATGCCGATCTTAGTTGTCCCAGATCTCT
CAAAGGGTTTGCCCGGTGTGAATACTGCTGGTGGTTCAGGTTCTGACGTTGGGACCGGTG
GTATGGAAACTAAATTGGTTGCTGCAGATTTGGCAACGAATGCCGGTGTTCATACGTTGA
TCATGAAAAGCGATACACCTGCGAATATAGGTAAAATTGTCGAGTATATGCAAACTCTAG
AACTTGACGATGAAAATAAAGTTAAACAAGCATATAATGGCGATTTAACGGATTTGCAAA
AAAGAGAATTTGAGAAATTAAAGGCTCTTAACGTTCCACTACATACGAAGTTCATTGCTA
ATGATAATAAACACCATCTAAAGAATAGAGAGTTTTGGATTTTACACGGTCTTGTCTCTA
AAGGCGCTGTTGTTATAGACCAAGGTGCGTACGCAGCCTTAACAAGGAAAAATAAGGCGG
GATTATTGCCAGCAGGTGTTATTGATGTTCAGGGCACTTTCCATGAGTTAGAATGTGTTG
ACATAAAAGTTGGTAAAAAGTTACCAGATGGCACGTTAGATCCAGATTTTCCCTTGCAAA
CAGTAGGCAAGGCAAGATGCAATTACACGAGTTCTGAATTAACTAAAATTAAAGGTTTGC
ACAGTGACCAAATCGAAGAGGAATTGGGCTATAATGACAGCGAATATGTCGCTCATAGAG
AAAATTTGGCATTCCCACCTCGTTGAAACGAACTAAAAAGTTATAGAGGATTCCCTTAAT
GATATTTCTTATATAAAACACTACCTTTATATTTCCAGGTTAAATAATGACACATTAAGC
ATGTTTTGTTTTTTTTTGAAGAATTGTGCAGAGCAGCTGTTTCTTCCTAATCCACATTAG
TGTTCTTAACTCAAAAAAAAGGTAGTTGTTAACAGCTACTTTTTGTGATCCGTTAAAATC
CTTCTATCTACTTATAAGCCCTAAATTAAATGAGTTGTGCGTATTTAAAATAAATGTATA
TTCAACCAAAGATTTGGATATCATCGTTTTTAACAGCCTCCAATTCTTCGTCATTTTCTA
TTCTGGCATGTTGTTCCTCATCCTCATTTTCATTAAAGTTCACTCGTTGACCTAACAATC
CCGCAAAGAATTCATCGATTTGGTCGTCTGACCATTTGTATCCGGATGTGATGGGGGCTT
CATAATTCGCAATTGGATCTTGAACTGAGTAGTTCAATTTCCTACCCTTGGAAGCCTTAG
TATCGATATTCTTCTTTAGCTTGTTGTTCGAACGAGCATTAGTTGAGGTGATTGTAATTG
CTGCACTTTCAGAATTGTGAGCGTTGGAAATCTTTTTGTCAATTAAATCGTTTAGTAAAA
CACGGTAAAAATCTTCGTCATCAAAAACATATGGGTTTTCGGTAATGTCAATGGCATTGT
TATCCTTTCTTCTTGGGTCATAGTTTTTCGGGATATCAAGCCCATCATCCGAATTCTCAT
TGTCATCAACACTATCTTTGACAACGGGAGAAATCAATTCTGGTAGCCTGCCATTAGCAC
AGTCTTTTTGGAAATACAAAGGCGTTATGTTTCTCCTGTTCAACTTTGTTCTTTTCATCA
AACGGGACATATCGGATAATTGGTTTTCGACTTGTACATCTGCAGGTAAGTTGATAGCTT
TGAATTTGTTAGATGATAAAGCAGCGTTACCTGATGCAGGAGAAACTTTGGTAGACCACT
TGTTTAATACGGCAGTCCTGTACTCTTTTAGTTCTGAGTCTAAGCTATTAGTTTCTTGGT
AAAGCTCTTTGAGAGATCTTTTTTTGGACAATTTATGCTTCGCCACCTCTTCATTTTGAG
TGATATGATCGCCAAGTTGGAATTTTATTCTGAAATTTATCAACCGATTGAATAAATTAT
TGAACAGTTTTTCGTTTTCCTTCAGCAAACGCTTTGTTTCCTCTGAATCATCCATTTTAG
CCTCTTCCCAGGACTCTGTAGTTAATGGAAGCTTATTTGCTGCAATTACAGCTTTTTGTA
GTTTTATTCTCAAATCAATGATGTTGTCAAATAATTTTGTCTGTTGTAAAATGGAATAAC
CCTTCGAAGCATCTCTTTGAACTGATTGAGACAGTTTGTTAATAGCTTGTTTAGTCTCTT
GTTGAATTAGTTTCGATAGTGCATGCCTTTTCTGTTGAGCCTCCTCCGTTTCACCGCCGT
CCGCGTCTGATTCTTCTTCATCGATCTCTACTTCTTCATCTTCAGAATCTGTCCTGAATG
AAAGAGCATCTTCCTCTTTTTCTTCTTCCTCTTCTTCTTCCTCTCCTTCTTCCTCTTCTT
CTTCTTCTTCTTCTTCGTCCTCATTCTCGGAAACTTCTTCATATAATGCTTGTCTTGAAC
CTTTAACACCTGTATATTTTGGATCGTTTAGTTCTAAACCTTTCTCTGCTCTTAACTTAG
ACTTTTCCACCTCCAAATAGTGCGCCTTCTTGGTTTCTTCTGTGTTGCTATTTCCATAGT
CGCTTAAATCACTTTCTCCATTTTTTTCATTGTGTTGAAATAAAGATGCATTTTCCTCAT
CTTCAATATCGAAGTCTTTATTGACCGGTTTAATGGCAATATCGGAAATTTGATCCGCTA
GTGATTTTTCCATCTTTTTTTGCTCTATATTTATTGGTAACAGTGCTTATTGTTACTCAA
TGTATGGTACGCTGCATACCTATCAAGATGCGACTACATATATACAATTATCTCATCTCA
TCGCGTATTGAAAAATTTTCCATCTTCTAATTTTTCAGAACCCATAAATTCGGGTAACGA
GCAGTGGAAAAAACTTAAATCCGCAGTAATAGGCTTGCAAAGGACCAAAGACAGCATATG
GAGCAGTTAAGAAATCTAAGAATGCATTGTATATTAGAGTAGTATATGGAAAAGCTCGGA
CTGGGAGCCGTAAAATCTCTTTCCCGTAAGATCTGGCTGCAAACCTGGTCTACATAAATG
TAGTACATTATAAGGGACTACCAAGAAATACGAAGCGCTCAGATATCTCTTAAAGTTCAT
TTTTTTGCCGGAATAATCTTGGTTTAGTAACTTATAAAACTACTTACGTCCAATAAATCG
TTATATTTTATGCCGTTGTCATAAAGTGGACACTTTCGAGAGACGGTGCTGGCCAATAAG
ATGCTAATATTTGAAATATTATTTACCCGGGCCCGGGTGGGAAAAACAAGGAATTAAAGA
TAATGAAGTGATCTTTTGGCGAGATAGTAAAACTTTCAATTATCTAGGAACAATTTCAAA
CGCCAATTGTTAACTTTGTGTACAGTATTTCTAGTTTTTATCTCATTGAAAACAAAATTC
AGTCAACTTGGAAATTTAAGCAGGCTACTGTGGCATTGAGATATTTTTCCGCAGAATAAG
AACCGATTAGCAAGTTACCGCATTATTTTTAAACCGTGGACAATCATGTTTAATAGAGTC
TTTACCAGGTCATTTGCATCAAGCTTAAGAGCTGCTGCTTCCAAAGCTGCTGCTCCCCCA
CCGGTGAGATTGTTCGGTGTTGAGGGCACTTACGCAACAGCTTTATATCAGGCCGCTGCA
AAGAACTCCTCTATTGATGCTGCCTTTCAATCTTTGCAAAAAGTTGAAAGCACAGTCAAA
AAGAATCCAAAATTAGGTCACTTATTACTGAATCCTGCATTGTCATTGAAGGACAGAAAT
TCTGTCATTGATGCCATCGTGGAGACTCACAAGAATTTGGATGGTTATGTCGTTAACCTA
TTGAAGGTTCTTTCCGAAAATAACAGACTGGGATGTTTTGAAAAAATTGCGTCTGACTTT
GGCGTTTTAAACGATGCTCACAACGGGTTACTTAAAGGTACAGTGACTAGTGCTGAACCA
TTGGATCCTAAATCTTTCAAGAGGATTGAAAAAGCTTTGAGCGCCTCCAAATTGGTGGGG
CAAGGTAAATCTTTGAAGCTGGAAAACGTGGTTAAGCCAGAGATTAAGGGTGGTTTGATT
GTAGAACTTGGTGACAAGACTGTTGACTTAAGCATTTCTACGAAGATTCAAAAACTGAAT
AAGGTCTTAGAGGACAGCATCTAACGTTAATAATATAGTTGGATATGCTCAACTCGTTTG
ATGTTACTTTCTTTGCCTCCCTCCTAATTTTTGATTCTGTTCAAATATATATTCTTCTCC
GTGAATTTTTCCTAAACATCAAAATTACGTACATATACGAATAAATAAGAAACCCCTCTA
AAAAGTGAATTTTTTTGTTCGAGACAACCATTTTAATCATATATATGTTCGTGTATCCAG
GCAAACTTATATTAATCGCAAAAAAAAAAATTATAAGTGTATATATGGAATAAACATAAA
AAATAATAAAAGAAGAAAAAAAAAAATAATGAAGAATTCTCATCAGTTTTCGAAGATTTC
AAGAAAGTCCGAAGAACATTTAAGACCTTTTTGATAATTCGAGATGTGCATGCACAATAA
TAACCATTTCATAGTTGAATTTTGATGTATTCTTTCGTTACAAATCAAATATATAGTCAA
AGTCACGCCTATACACTTAATAATATGTCTTGATGTATATAAATGGATAATAAATACAAA
CGTGGGAAGTCGGAGACATTGCCTTTACCCAGCAATTGAACGGGAGGTATGCAAAAGGGT
TATTTCTCTTTCTTTACTTCATTTTCAGCAGCATTCATAGCTTTGAAGTTTTTGAGTTTC
TCCTTCTTTTCCAATTCTCTCTTTTGCAAAAACTCTTTGTACTTGTCGATGGTGACACGT
CTTTGCTTCTTTTGATATTCTTCAAACCCTTTAAAGTTAGTTTGGAACAAATTGTCCCAG
AAAGTGAAAAATGGTTGAGCAAAGTTCGTCTTGATACCAAATTGCTGGTGGTGGATATCG
TGATAGACAGCGTTATTAGGGAAAAGCCATTGGAATGGGTCAAGTGGCAAAGCATACCCA
CAGTGGTCATCGACAGTCTTCATGGTGGCAAAGGTAAAAAGAATGATTTGCTCTCTGTGA
GTCAAATGAGTTAACGTCATGGCAATACCGGTTCCCAAAGTATCTAACAAGAAGCCCTCA
ACAGGATTGTTGAAAAGAGCACCGTAAGCATATGGCACGTATAGTTCATGATGAACAGAG
TGGAACCATTTGTATAAGGTCTTATTCATATGCATCAATCTATGCAAAAAGTATTGCCAT
GTATCAACGAATAAAAAGCCTGCAAAGATCTTCAAAGCGGACATTCCGTACATATAGCCG
TAATAAATAGTGGCATCTGGAATAATCCGAGGAAGGTCTGCACGAAGCTTCCACATGGCA
TTTTCTTCAAACCCAGTCATGTAGATCGGCTCGAAGTGCATAAAGATAAGGCCAACAATG
GTCTGTATGATATGTTGTAGAATCACTTCAAGGAAAACATGCATTCTCGACGCCTTGTTC
CTCTTGGCAACCTCTTCGCTCGGATGAATTCTGTACTTCTCAGCCAGATGGAAAGTGTCT
ATTACATGGAATATACCAGACAACGCCCAGTAGGCAACAACCGGCGCAACCAAGGCCAGC
ACACCATCACTCATTTCCGGCAGCAAGGATTCCTTGGGGCGTAAATTAATGGCAGGGGCC
TTGGCATAGTGCATAAACCCAAATGAGGTCTTGAGACCAAATGCTAGTGGAAAGGAACCG
GCTGCAGTTGCATTCGATGTTACGTTCATCGTATATTTTCTTTTCGTATACACCCTCTTC
GGACTAGAATGTTAGAAATACCCAGACCAAACAGTAAAGACGAAGACCCGGAGTAAATGC
AAGGGAATAGAGGATATGTAAATCGTTACTTCTTTTATAATCCCAAAACACGAAACGAAA
AATGCGGCAACAACAGCGCAGCAGGATGAAGAAAGAGTGAAATAAATCAAGACAATAGCA
AACAAGAGATTTTTAATAACCCAAAAAGAAATTTTTCTGTTAAAATTGGTGCGGAAAGAC
TAAGAAAGGCCGCAGAAGCCGGAGAAAAGCGCGACTGCCCGAAGAAGGACGCGGGGTGAG
GGAATAAGACAATAGGAAACAGGAGGTCGAAAAGCTTATTAAGCTGTGCAAGTGAAAAAG
ATAGAGAAATGACGATAAGGTGAGAAGGATAAAACGCGTTTCAAGTCACACAACAGCAGC
AGCAGCAGTGGCAGCAGCAGCAGCGGCAGTAATAAAGACTAGCCCTGCGTATTCCTGTTT
TGACCTATCTTCTTTTTGCGGATACCCGCACAGCACGTGTGTTTCCGTGGAACGGGATTT
GGCAGAAAGGTTTGCATTGCACTATTTACATGAGCTTATATATGTTTTTTTTTCTACCTG
CATTTGTATATCTAATGACGAAGCGTTCTACTGGGAAGACACTTCCGTCTGCTCTGTAGG
ATGTGATTCGAGCTTAGCTAGTTCCTTCAGAATCACGCTTTCTTCCCTCGCAATGTTCCC
CACACGCTGAATAAGCTTGTGTTCCAGCCCCAGAGCATTGAACACATCGTAATTCCAATG
TTTGTCCTTGTCACCCATCCTCCATGGGTCCTCCCAGTATATGGACGGTTTTTTGGCGGG
TGCTGTCTGCTTTTCTGCTTGTGTGGCATTCTCAAACACCTTCAACAAGGACTCCCGCAA
GTCTGCCACTGCCTCTTGACAATATGTAGGTCTATACTGTCCGCTATACCAGACGTGTCC
GTTAGAGTCCTTTTTTCTTAGCTTGTCACTCTCCTTACGCTGTGCCACATCACGGAGGTA
TCTCAACCGGCAGAGGTTCTGGTATAGATGGACACTCTGCTTATAGTTTTGCAAGTTCAC
TACACACATACATTTCCAGATGTCCCTCCTCAATGATGGCTTTCTGTTGCTCCAGTTTGG
TCTCACAAACAGCTTATCCACCTGTGTTTGCGAAAAGTTGGGAAATTGAGAATATAGTAC
TTGTCCATACTCTAGGTTCCTAAAGATGTATACCTGGGGTGGAATTATCTTTGTCTTTTC
GAACCATGAAGCGGGGCGGAATCTTGAAATTGAATGGTTTACCTTCATGCTTTTGCCCTG
AAATATCGATTTTTCTGTCGCTGTTTCTCTATTTATTCCTCACAGGATCTCCTCTTTCCG
TTTTCCTCTACATTTCATCATATAGCCTTACTTTCACTTTTTCCTTTAGTATCTGAATAT
CGGAAAAGAGAATATTGTAGGAAATGTATTTTTCCCGTCTACCGTACAAAATGAGTCGTT
AACTTGACAGGAATCATCAACTTTATGCACGTCTGAAATTTAACCGTGGCGTATATGGTT
CATTGCTTACACGAATGTCTCCTAGTTTATATTTCCTGAGAAAGTTCTCTACAGCCCAAA
TAAATAGTTATATAGATATATAAGAAAAGCGACAACAAAAGAAAAAAAAAATACAGTCCT
ACTAAAATAACATAATTGCGGCACAGAAGAGTAACCACAACTAGTAGAACATCGAGAAAG
GAGAGGTAACAAAAAGACAGAATTGAGAACGATTGAAGGCGTTTGAGTAGTAGTAAAAGT
ATTTGGCTTCATTAGTGTGTGAAAAATAAAGAAAATAGAGACAATACTATCGACATGAGT
AGGAAAAATTCTAAGAAACTAAAAGTCTATTACTTACCTGTAACGCTAACCCAATTTCAA
AAGGATTTATCAGAAATTTTGATATCCCTGCACGCCAAGTCATTCAAAGCAAGCCTAATA
GGAGAACCACAGGCAGATGCAGTGAACAAGCCTTCCGGCTTACCTGCTGGCCCTGAAACA
CATCCGTATCCAACGCTATCACAAAGGCAATTAACCTATATCTTTGATTCAAACATAAGA
GCAATAGCCAATCATCCTTCCCTTCTAGTGGACCATTATATGCCTCGACAGCTTTTGAGA
ATGGAGCCCACGGAAAGCTCTATTGCTGGGAGCCACAAGTTTCAAGTTCTCAACCAGCTC
ATTAATTCGATATGCTTTAGAGACAGAGAGGGCTCACCAAACGAAGTTATAAAATGCGCC
ATCATCGCACACAGCATAAAGGAATTAGATTTGCTAGAAGGTTTAATATTAGGCAAGAAA
TTCAGAACCAAGAGACTTTCCGGTACATCTCTTTATAATGAGAAACACAAATTCCCTAAT
CTACCTACGGTCGATTCCACAATAAATAAAGATGGAACACCAAATTCTGTAAGCAGCACA
AGCTCTAATTCCAATTCGACCTCCTATACAGGTTATTCGAAGGACGACTATGATTACTCA
GTGAAAAGAAACCTGAAAAAAAGAAAAATAAATACAGATGACTGGCTGTTTTTAGCCACT
ACCAAACATCTCAAACACGATCAATACCTATTGGCTAACTATGATATAGATATGATAATT
AGTTTTGATCCAATGTTGGAAATTGAATTGCCCGCTTTGCAAGTACTGAGGAATAATGCC
AATAAGGATATTCCGATAATAAAGCTATTAGTACAAAATTCTCCGGATCATTACCTGTTA
GATTCTGAAATCAAGAATTCAAGTGTTAAATCGTCGCATTTGAGCAATAACGGTCATGTC
GATGATAGCCAAGAATATGAAGAGATCAAATCCTCCTTACTATATTTTTTGCAAGCAAGG
AATGCTCCGGTGAACAACTGTGAGATTGATTATATTAAATTGGTAAAGTGTTGTTTAGAG
GGGAAAGATTGCAATAACATTTTACCGGTTTTGGATTTGATAACGTTAGATGAGGCCTCC
AAAGATTCGAGCGATTCTGGGTTTTGGCAGCCTCAATTAACAAAATTGCAATATTCGTCT
ACAGAATTGCCCCTTTGGGACGGACCATTGGATATCAAAACCTATCAAACAGAGTTAATG
CATAGAGCCGTCATAAGATTGCGAGATATACAGGACGAGTATGCCAAAGGCACTGTTCCA
CTGTACGAGAAACGATTAAACGAAACTCAACGGCAAAATCAGTTGGATGAAATAAAGAAT
TCTGTTGGTCTTACATTCAAGAAAAAACAAGAAATGGAAAAATCCATTAATGACTCTGAA
AAAAGGTTGAAGCATGCGATGACAGAATCTACCAAGCTACAAAATAAAATAAATCACTTA
CTGAAAATTAGGCAGGAACTAGAGAATTTCAACAAATTGCCCTCGAATACTACTTCATCA
GAAAATCATCTGGAAGAGGGATCTGCCTTAACAGACAAGTTGAAGGAATACATAGACAAA
AATGCGACTCTTTTTAATAAGTTAAGGGAACTCCAACAAGCAAATGCGGAAAAATCAAAG
CTCAATGATGAACTACGTTCCAAATATCAAATAGAATCTTCAAAAGCCGCAGAGTCCGCG
CAAACATTGAAAATTTTGCAAGAATCAATGAAGTCTTTAGAAAACGAAGTTAATGGTCCA
CTGACTAAATTTTCCACAGAAAGCTTGAAGAAGGAGCTGGAACGTTTACAGAATGATTTT
CAGTCGCTTAAAGCAAAAAACAAATTCTTAAAGAATTACATAACCTTAATGAACCGACAG
TACGACTTAAAAAACAAAAACAACGTCCAGGTGGAAAAAGCTGCCGCAAATGGTACACGG
TTTAGATCAACAAGATCCAATACCCCTAATTACACATGAATGTGACGTTTCCTAAAAGAA
GTAGCCTGTATAATATAGAGAGATTTTATATACTTTCTTAATGAATTAGACTGTTTCTAC
AAGTATTTGACACTGGAAAAAAAGAGAAAGTACATAGAGATTGGCCAAATATTTAAATCT
ACATAGTTGCCTATCGTTTATCGCCTTATTCTTCAGAAACATTTCATCAACTACTCTGGT
GCATTATTTCATGTTAGTTACCATATATACCGGCCGGCCGCATCGGGGTTTTTTGATTGA
AAAATTGGTATATTTTCAGTACACATATAAATAAAACCCTCAATTTGCCTCTCCAACCGT
TATAACTATTCCAGATCCTCTTTACCGAGCAAGTAGGCTAGCTTCTGTAAAGGGATTTTT
CCATCTAATACAATGAGTGGAGTATCAAATAAAACAGTATCAATTAATGGTTGGTATGGC
ATGCCAATTCATTTACTAAGGGAAGAAGGCGACTTTGCCCAGTTTATGATTCTAACCATC
AACGAATTAAAAATAGCCATACATGGTTACCTCAGAAATACCCCATGGTACAACATGTTG
AAGGATTATTTGTTTGTGATCTTTTGTTACAAGCTAATAAGTAATTTTTTTTATCTGTTG
AAAGTTTATGGGCCGGTGAGGTTAGCAGTGAGAACATACGAGCATAGTTCCAGAAGATTG
TTTCGTTGGTTATTGGACTCACCATTTTTGAGGGGTACCGTAGAAAAGGAAGTCACAAAG
GTCAAACAATCGATCGAAGACGAACTAATTAGATCGGACTCTCAGTTAATGAATTTCCCA
CAGTTGCCATCCAATGGGATACCCCAGGATGATGTTATTGAAGAGTTAAATAAATTGAAC
GACTTGATACCACATACCCAATGGAAGGAAGGAAAGGTCTCTGGTGCCGTTTACCACGGT
GGTGATGATTTGATCCACTTACAAACAATCGCATACGAAAAATATTGCGTTGCCAATCAA
TTACATCCCGATGTCTTTCCTGCCGTACGTAAAATGGAATCCGAAGTGGTTTCTATGGTT
TTAAGAATGTTTAATGCCCCTTCTGATACAGGTTGTGGTACCACAACTTCAGGTGGTACA
GAATCCTTGCTTTTAGCATGTCTGAGCGCTAAAATGTATGCCCTTCATCATCGTGGAATC
ACCGAACCAGAAATAATTGCTCCCGTAACTGCACATGCTGGGTTTGACAAAGCTGCTTAT
TACTTTGGCATGAAGCTACGCCACGTGGAGCTAGATCCAACGACATATCAAGTGGACCTG
GGAAAAGTGAAAAAATTCATCAATAAGAACACAGTTTTACTGGTCGGTTCCGCTCCAAAC
TTTCCTCATGGTATTGCCGATGATATTGAAGGATTGGGTAAAATAGCACAAAAATATAAA
CTTCCTTTACACGTCGACAGTTGTCTAGGTTCCTTTATTGTTTCATTTATGGAAAAGGCT
GGTTACAAACATCTGCCATTACTTGACTTTAGAGTCCCGGGAGTCACCTCAATATCATGT
GACACTCATAAATATGGATTTGCACCAAAAGGCTCGTCAGTTATAATGTATAGAAACAGC
GACTTACGAATGCATCAGTATTACGTAAATCCTGCTTGGACTGGCGGGTTATATGGCTCT
CCTACATTAGCAGGGTCCAGGCCTGGTGCTATTGTCGTAGGTTGTTGGGCCACTATGGTC
AACATGGGTGAAAATGGGTACATTGAGTCGTGCCAAGAAATAGTCGGTGCAGCAATGAAG
TTTAAAAAATACATCCAGGAAAACATTCCAGACCTGAATATAATGGGCAACCCTAGATAT
TCAGTCATTTCATTTTCTTCAAAGACCTTGAACATACACGAACTATCTGACAGGTTGTCC
AAGAAAGGCTGGCATTTCAATGCCCTACAAAAGCCGGTTGCACTACACATGGCCTTCACG
AGATTGAGCGCTCATGTTGTGGATGAGATCTGCGACATTTTACGTACTACCGTGCAAGAG
TTGAAGAGCGAATCAAATTCTAAACCATCCCCAGACGGAACTAGCGCTCTATATGGTGTC
GCCGGGAGCGTTAAAACTGCTGGCGTTGCAGACAAATTGATTGTGGGATTCCTAGACGCA
TTATACAAGTTGGGTCCAGGAGAGGATACCGCCACCAAGTAGCTATATAGAATCAAATCT
CATACATAATTTAAAAAACGAGAGTGCAATGTGATGATTGTGATTCCTGATCCTATGTCA
CGGACGACGACTTGTATCACCTTGAATTTTCTGACCAAAGGGGCCGAGTCGCTTCACGAG
GGGATGAGAAAGGAAAAGAAGGGAAAACTAAACTTATATAACGCAGGTGTGTCTTTCTAC
CATTGCCATCAAGTTATTAAAGGCCACGAACAGGAACGCTAGAGACCTGAGTTTGTCATT
TGTTTAGTTCAAGGATTAAATAAACAATCCTTCTACAAATAAGTCCTTTCTTTCACCATC
GTCTTAAGACCACTGCCTCCAACGAAAACTAACCTAAAAGAGTTTAGATCACGAGTATTT
TCGCTCTTTCCCTCCTTCCCCTGGTTTTTTCTCGTTAGTTCTTTTCATTTAAAAACTCTT
CTCTTGTCAAGAATTTAAAAGACGAAGAGTCCAACACCGACTGATTTTCTAACAGCAAAG
GAACGAAGTTTTGCCGTGCAAACAATAATTTCTAAATTATAATTTTGAGCCTAGCTGAGA
AATAGGAGAGATTATATTTTAGAAAGGTAAGAAGTTTTTCTGTCATTCCTTTTAGAATAT
TTGCTACGTTCTAACATTTTTTGTTACTCAAGCGCATTTTCTGCAACTTCCCTTATAAGC
TATTTCCTTTTTTTGGGACCGATCCTTTCTTCTGTCTTTGGTAACCTAAAAACCGGAATA
GTCAAAGTTATCTGCATAGTCTTCTTGCCAGGCTTATTTTCGCCATACCATTTTTCTGGT
ACCCTAAACATTTTGGTCTTATTTTAGAACAGCTGGTGCCTCGTTTTTCCGCATTAGGCG
CACTTTTTTCATAGCCACTATTCTAAAAGAAACAACTTTTTTTCAAAGGGAAATCTAAGT
TGCCTGCACGAAGAATAAGACAAGGGTTCATAAACGTATAGTATTTGCCAAGTTCCATCT
TTTTCTTTGTCACTTTAATATCGCAAAACAGAACACCAAAAACCTTTCAGCGCAAAGATT
TGGCCCAATTATTCCATCTTTATACACTATGTCTAAAAATAGCAACGTTAACAACAATAG
ATCCCAAGAGCCAAATAACATGTTTGTGCAAACCACAGGAGGTGGTAAAAACGCCCCAAA
GCAGATTCATGTTGCACACAGACGTTCCCAAAGTGAGTTGACAAATTTGATGATTGAACA
ATTCACTTTGCAGAAGCAGTTGGAGCAAGTTCAAGCACAGCAGCAACAGTTGATGGCTCA
GCAACAGCAATTGGCACAACAGACAGGACAATACCTGTCAGGAAATTCTGGCTCTAACAA
TCATTTCACGCCTCAACCGCCTCACCCTCATTACAACTCAAACGGTAATTCACCTGGTAT
GAGTGCAGGTGGCAGCAGAAGTAGAACTCACTCCAGGAACAACTCCGGATATTATCATAA
TTCATATGATAACAATAACAATAGCAATAATCCTGGGTCTAACTCACACAGAAAGACGAG
TTCACAATCCAGCATATATGGCCATTCCAGAAGACATTCTTTAGGTCTAAATGAAGCGAA
AAAGGCTGCTGCGGAAGAACAAGCTAAAAGAATATCTGGGGGTGAAGCAGGCGTAACTGT
GAAGATAGATTCTGTTCAAGCTGATAGTGGCTCAAATTCTACTACAGAACAATCTGATTT
TAAATTTCCACCACCACCAAATGCTCATCAGGGCCATCGTCGCGCAACTTCAAACCTATC
ACCTCCCTCTTTCAAATTTCCTCCAAACTCTCACGGGGATAATGACGATGAATTCATAGC
AACCTCTTCAACGCACCGCCGTTCAAAGACAAGAAACAATGAATATTCTCCAGGCATTAA
TTCCAACTGGAGAAACCAATCACAGCAACCTCAACAGCAGCTTTCTCCATTCCGCCACAG
AGGATCTAATTCAAGGGATTACAATTCCTTCAATACCTTAGAACCTCCTGCGATATTTCA
GCAGGGACACAAACATCGTGCCTCTAATTCATCAGTTCATAGTTTCAGTTCACAAGGTAA
TAATAACGGAGGTGGACGTAAGTCCCTATTTGCACCCTACCTTCCCCAAGCCAACATTCC
AGAGCTAATCCAAGAAGGGAGACTAGTAGCTGGTATATTAAGAGTTAATAAAAAGAATAG
ATCGGATGCCTGGGTCTCTACAGATGGCGCTCTTGATGCGGATATTTACATTTGCGGCTC
CAAAGATCGTAATAGAGCACTTGAAGGTGATTTAGTCGCGGTAGAACTATTAGTTGTGGA
CGATGTTTGGGAGTCCAAGAAAGAAAAGGAAGAAAAGAAGAGGAGAAAGGATGCCTCTAT
GCAACACGATCTAATTCCTTTGAACAGTAGTGACGATTACCACAACGATGCATCTGTTAC
TGCTGCAACAAGCAACAATTTTCTATCTTCTCCCTCCTCGTCTGATTCGCTAAGCAAGGA
TGATTTATCCGTCAGAAGAAAGAGGTCATCTACTATCAATAATGATAGTGATTCCTTATC
ATCTCCTACCAAATCAGGAGTAAGGAGAAGAAGTTCATTGAAACAACGTCCAACTCAAAA
GAAAAATGACGATGTTGAAGTTGAAGGTCAGTCATTGTTATTAGTTGAAGAAGAAGAAAT
CAACGATAAATATAAGCCACTTTACGCAGGCCATGTCGTTGCTGTTTTGGACCGTATCCC
TGGTCAGTTATTTAGCGGTACATTAGGTTTGTTGAGACCATCCCAACAAGCTAATAGCGA
CAATAACAAACCACCACAAAGCCCAAAAATTGCTTGGTTCAAGCCTACTGATAAGAAGGT
GCCATTAATTGCAATTCCTACAGAATTAGCTCCAAAGGACTTTGTTGAAAACGCTGATAA
ATACTCCGAAAAGTTATTCGTTGCCTCTATTAAACGTTGGCCAATCACATCTTTGCATCC
ATTTGGTATTTTAGTTTCCGAACTTGGAGATATTCACGATCCTGATACTGAAATTGATTC
CATTTTAAGGGATAACAATTTTCTTTCGAATGAATATTTGGATCAAAAAAATCCGCAAAA
AGAAAAACCAAGTTTTCAGCCGCTACCATTAACGGCTGAAAGTCTAGAATATAGGAGGAA
TTTTACGGACACTAATGAGTACAATATCTTTGCAATTTCCGAGCTTGGATGGGTGTCTGA
ATTTGCCTTACATGTCAGGAATAACGGAAATGGTACCCTAGAGCTGGGTTGTCATGTTGT
TGATGTGACCAGCCATATTGAAGAAAGCTCCTCTGTTGATAGGCGTGCGAGAAAGAGGTC
CTCTGCGGTATTCATGCCACAAAAACTTGTCAATTTATTACCACAATCGTTCAACGACGA
ACTGTCGTTGGCCCCTGGCAAGGAATCAGCCACGTTGTCGGTTGTTTACACTCTAGACTC
ATCTACTTTAAGGATTAAATCTACTTGGGTAGGCGAATCTACAATTTCCCCCTCAAACAT
CTTGTCTTTAGAACAATTAGACGAAAAATTATCTACTGGAAGTCCCAGTAGCTACCTCTC
TACTGTACAGGAAATTGCTAGATCATTTTATGCTAGAAGAATAAATGATCCAGAAGCTAC
ATTACTTCCCACCCTGTCCTTATTGGAAAGCTTGGATGACGAAAAAGTTAAGGTTGACTT
GAACATCCTGGATAGAACTTTAGGCTTTGTTGTAATTAATGAGATTAAAAGAAAGGTCAA
CTCCACTGTTGCAGAGAAAATTTACACCAAACTTGGTGATCTAGCTCTTTTGAGAAGGCA
GATGCAACCCATTGCAACCAAGATGGCGTCATTTAGAAAGAAAATTCAAAATTTTGGTTA
CAATTTTGATACCAATACGGCGGATGAATTAATCAAAGGGGTGCTAAAAATTAAAGATGA
CGATGTTAGAGTCGGAATTGAAATTTTACTGTTTAAAACCATGCCAAGAGCTAGATACTT
TATTGCTGGCAAAGTAGACCCGGACCAATATGGGCATTATGCCTTGAACCTACCTATCTA
CACACATTTCACAGCGCCAATGAGAAGATACGCTGATCATGTCGTTCATAGGCAATTAAA
GGCCGTTATCCACGATACTCCATACACCGAAGATATGGAAGCTTTGAAGATTACCTCCGA
ATATTGTAATTTTAAAAAGGACTGTGCTTATCAAGCACAGGAACAAGCAATTCATCTATT
GTTGTGTAAAACAATCAACGACATGGGAAATACTACAGGACAATTATTAACAATGGCTAC
TGTCTTACAAGTTTACGAGTCCTCCTTTGATGTATTTATTCCAGAATTTGGTATTGAAAA
GAGAGTTCATGGAGATCAACTACCTTTGATCAAAGCTGAGTTTGATGGTACCAATCGTGT
CTTGGAATTGCATTGGCAGCCCGGCGTAGATAGTGCAACTTTTATACCAGCAGATGAAAA
AAATCCAAAATCCTATAGAAATTCCATTAAGAACAAATTCAGATCCACAGCCGCTGAGAT
TGCGAATATTGAACTAGATAAAGAAGCGGAATCTGAACCATTGATCAGCGATCCATTGAG
TAAGGAACTCAGCGATTTGCATCTAACAGTACCAAATTTAAGGCTACCATCTGCAAGCGA
CAACAAGCAAAATGCTTTAGAAAAATTCATTTCTACTACTGAAACCAGAATTGAAAATGA
TAACTATATACAAGAAATACATGAATTGCAAAAGATTCCTATTCTATTGAGAGCTGAGGT
GGGGATGGCTTTGCCATGTTTATCCGTCCGTGCATTAAATCCATTCATGAAGAGGGTATA
ATTTCTTCTACCAATATCGTCATTGCTGTTTTTCTTGTTTTTCACTTTCGTTCTTTGGAT
TGTGCTTCACCCCTCAGTATCCCTTCCCTTTGTTTTTATTTCCTGCGAACATTAACAACT
GCATGAATTTTGTACTTCTCCTTTTAATCCACGTTCCGGTAAGGCATCATCCAAATTTTT
TTATTCGACCTCGTTAAGTCATATATTTTTTCCCAAAAATACATAAAACAATAATGCAGC
CTTCTTTTCAATATTTACAACTTTTCAATTTATATTGTCTTTTGTTATTTATACTCTTAT
ATATTAAATTTATTCCGTTACTAAATACCCTTTTGCTGTACAAATATCATCAAAGAGAAG
TACTGAAAGCTTACTTTTTATGCGCTGGGTAATTTTTCCGGAAACAATAGCGAAATCATC
GTCGAGCAATTTTGCTCGTACTTCAGAAACTACTGCGTAAACATTTGAGGTCGTACAATA
AGTAGATAGAAATAAATAAACCAATTTTTCGTCAGCGTTTAATCTGTAGCCAAAGATTTG
TGGTATTCTCACAGTTTGAATAATATTCAGCTACTTCATCAAGTAATTTTTTTTCAATAG
GAGATTCACGGTTCAATAAGTGCATTGATTATGTTCGACCAATTAGCAGTCTTTACCCCT
CAAGGTCAAGTACTTTACCAATATAACTGTTTAGGAAAAAAGTTTTCTGAAATACAAATT
AACAGCTTTATATCCCAGCTGATTACTTCCCCAGTAACTAGAAAAGAAAGTGTTGCAAAC
GCAAATACAGACGGATTTGATTTCAATCTTTTAACAATCAACAGCGAACACAAAAATTCT
CCTTCATTTAATGCACTATTTTATTTGAATAAGCAACCAGAATTGTATTTCGTAGTGACT
TTTGCCGAGCAGACTTTAGAGCTTAATCAAGAAACTCAACAAACACTTGCACTGGTGTTA
AAACTCTGGAACTCATTGCATTTAAGTGAATCCATTCTAAAAAATCTTCAGGGCCAAAAC
GAAAAGAACAAGCATAACTACGTCGATATTCTTCAGGGAATTGAAGACGATCTGAGGAAA
TTTGAGCAATATTTTAGGATAAAATATGAAGAGTCAATAAAACAAGACCATATCAATCCA
GATAATTTTACCAAAAATGGATCAGTACCCCAATCGCATAATAAAAATACCAAGAAAAAA
TTGAGGGATACAAAAGGTAAGAAGCAATCTACAGGAAATGTTGGTAGTGGGAGAAAGTGG
GGCCGTGATGGTGGCATGCTTGATGAAATGAATCATGAAGATGCAGCCAAATTAGATTTC
TCATCATCCAACAGCCACAATAGTAGCCAAGTAGCTCTAGACTCCACTATTAATAAAGAT
TCTTTTGGGGATAGAACAGAAGGAGGCGATTTCTTAATCAAAGAAATTGATGATCTTTTG
TCTTCTCATAAAGACGAGATAACTAGTGGGAACGAAGCTAAAAATTCTGGATACGTCAGT
ACAGCTTTTGGATTCCTTCAAAAACACGTTCTAGGTAACAAAACGATCAATGAAAGTGAT
TTGAAATCTGTATTAGAGAAGTTAACACAACAATTGATAACCAAAAATGTAGCACCAGAG
GCAGCAGACTATTTAACACAGCAAGTCTCTCATGATCTTGTAGGCTCAAAAACTGCAAAT
TGGACCAGTGTTGAGAATACTGCTCGTGAATCTTTAACAAAAGCATTAACTCAAATATTA
ACGCCTGGTGTATCCGTTGATCTCCTCCGTGAAATTCAGAGCAAAAGAAGCAAAAAGGAT
GAAGAAGGTAAATGTGATCCCTATGTGTTCTCTATAGTTGGTGTTAATGGTGTTGGTAAG
TCAACAAATCTTTCAAAGCTAGCGTTTTGGTTACTGCAAAATAATTTCAAGGTCTTAATT
GTTGCTTGTGATACGTTTAGGTCTGGTGCAGTTGAGCAACTAAGGGTCCATGTTGAAAAT
TTGGCACAGCTAATGGATGATTCACACGTTCGTGGCTCCAAGAACAAAAGGGGTAAAACT
GGTAATGACTACGTTGAACTATTTGAAGCTGGTTATGGTGGATCTGACTTGGTAACCAAA
ATTGCAAAGCAAGCCATCAAATATTCTCGTGATCAAAACTTCGATATAGTGTTAATGGAT
ACTGCCGGGAGAAGGCATAATGATCCTACTTTAATGTCGCCATTGAAGTCTTTCGCTGAC
CAAGCCAAGCCAGATAAAATCATTATGGTTGGAGAGGCTTTAGTAGGTACTGATTCTGTC
CAGCAAGCCAAAAATTTTAATGATGCCTTCGGAAAGGGAAGAAATCTTGACTTCTTTATT
ATTTCCAAGTGTGACACAGTTGGTGAAATGCTGGGTACTATGGTAAATATGGTTTATGCT
ACGGGGATTCCTATCTTATTCGTTGGCGTGGGACAAACCTATACCGATTTGAGGACATTA
AGCGTAAAATGGGCTGTTAATACATTAATGTCTTAAAAACTGTAATATCATAGTATATAT
ATATATACCACAGACAATGTTATTCAACAATAATAAAGTGTCTTTTTTTCTGTGCATCAA
CAAGGTGACAGAATGTTGATGTAACTTCTTTCCACCAAGTGAATCTACAAGTAGTAGAAT
AGAGTATTTATATTCGGTTTACAAACTACAAATAGCGTGCTCATATCTCTTTTTTAATGA
TTTCATTTGTATGAGTATCGTCTTTCGTAGCTCTTCTAACGTCAATAATCTTAAAATCAT
CTGAAAAGTTGACATGCTCTGACACAGGAATAACAGTCTCTACTTTTATCTCTGGCATAT
TTGGCTCTGGACCATCTTTGATAAGATCTATAAAACTATCTTCCGAGTGACCTAGAATAC
AATGCAAAACGACTTGGGCGCCAGGTTTCGACAGGACCAGGCTGTTTTCCTTACAAAAAG
AAGCCGCTACACAGTCAGGACATCCATCGCTGCATGGGCATTCTTCTATTCTTCTTAAAC
TAGACTCTATAATATCATCAATATGCTCAAACGCTTTAACACACAAGCCAGACCCGTACT
TACCGCCCTTGGAATCATAGAATATTAATCTAGCTGGTCGCTTTCGTTTAGTTTGACGTT
CTGCAAATTCCTTTTCCGGAGCTTTGCATTCAGTTTGTATTTCATCCACACCCGCCACTA
TAAATCGCGGTAACATACCCATAATTGCATGTTGCGCCCCGTGAATAGCTCCTGCTACAT
TTAATTGCTTCTTTTGGCAAATTTCTAAGGCATATTTTGGCATATCTATCCATAATCCTT
TAGAATTGATTATTACAGGAGGGTTATGGGTTTCGATGGCATCGATGATCCTCTTGTACT
TGTCTACTTTAAAAAAGCCAAATACAATAATTGTAGTCTTGATCTTACCAAAGTAAACAG
GAACATCACTATTCCTTAAAGAGCGTATAAGTTCAATTTCCTGTGGATCTACATCTGTAA
AGTCTCTTTGGTTGGTTACCCAGTCAACATCTACTCTTTGCACTTTAGCATATCTTTCAT
CAGGATTAAACTCCTTCACAAGGTAGGGATAGCCTTGGTGAATGAATATACCGCCATCAT
ATAAAGTAAAACTAGTCCTGGATGCTTCTATTTCCTCAATTATTATATTTCTTCCATTTG
TTATATCCACTACGGCAAATTGATCTTCTTCTCCGCCTCTCAAAGATACACACTTGGACG
GCCATGGTAAAAATCTATTACTGGCGTGGTACCCATCTTGATTGTGATGTAAGCGTTCAA
CACAGATTTTGCGAAGATGAGATTCAGTAAAGTATTGCTTGTCACGTTCAAAATTTATTG
GCAGTTCGAAAGCAGCGCATTGTATGTGTCCTTCCAGTATCAAAATGTTATTGAAATCAA
GAACCAAATCTTGATAAGATTCGAAATTATTAACCTCCAGCAAGGATTCTGGATGAGCAA
CATAATGTTGATCAACAGGCGAGTCACTTGCAACCACGAGGGTTAAAGAATCATTATTTC
TTCTTCCAGCTCTACCACTTTGTTGATGAAAATTCGCCATTGATAGTGGGAAACCGCACA
TCAAGACTGCGTCTAGTCCACCGATATCAATACCAAGTTCTAGAGCATTGGTAGATATGA
CAGCCTTTAAATTTCCGTGAAACATCTCACGTTCTATTTTACGTCTGTCGGAAGCAGAAT
AACCACCCCTGTAAGACATGACTTCTGTAACCAGATCCTCACGCCCAGTTTCAATAAAAA
TATTGCGAACTTCTTTCATCAACAATTCACAAACACGACGAACGTAGCAAAATGCTATGG
TTCTTACGTTGTTCAATATCAATTGTACCAATATCTTTGCACTCTCTCTAATGAAATTTT
CTCGTTTACGTTCGTGTTGAGGTAAAATTGGAGGATTCCACACCACTAGATGCTTAGCAC
CTGTAGGTGAGCCATCCTCGTGTATTAGCGTAACCTCATTAATTCCAAACATGTCCTTCA
TATGTTGTACTGGAGACTTTAAAGTTGCAGAACATGAAATAAATTGTAAACCACTGTTTT
CGTAAAAACAGTGGCACAGTCTTAGTAAACGTCTCATCACTAATGCCACGTGCGATCCAA
ATAAACCCTTATATATATGCAATTCATCGACCACCACTAACTTTAGATGGTACAAAAAAT
GTCTCCAATTTGCATGATTAGGCAAAATGCTGGTATGTATCATGTCAGGATTGGTAAAAA
TAACTCTAGCATTTTTACGAATATAAGCTCTTTCCTCTGGCTCCGTATCGCCGTCATACG
TATCAACCACGGCATTCTTTAGCTCGGGGATCTTTGAAAGTATTACCTTGAATGCTCTTT
TTTGATCTTGTGCCAGGGCCTTTGTTGGAAATATATACATAAACGTTGATTCAGGATCCT
TTAAAAGAAGATCGATAGCTGCTAGTTGGTAAATAAGGGATTTACCTGAAGAGGTCGATG
TTGTAATAATGACGTTTTCGCCTTGATGAAGACTGTTTATCGCATCTGCTTGATGGCTGT
AGAAATTTTCGTGTTCCATACCCTGATATACTTCCGGTGCAAGCTCAAAACAGAGACCTT
TATACTTCGCTGTTCTTGACGGTATTGTAAAACAATGCTTTATCTGAGAAGCGTAGAATT
CAGTACTTTTCAATTTCTCAATCATTTGAGGAATTGTTGTTATTACTGAATTATTGGCAT
AATTGGGAATGCTCATCTCATTACTTTCTTGCTTCGCCTTCATCATTGCCTCAATAGGAT
CCTCATAATCTCTCTCCCTTGGAATATATTTCTGCGCTAGATTTGTTAACTCAGAAAATG
GGTCAAGGTTAGCCTTTTCCTTTTCCAGGATAAATTCCCGTAGTCTGGATTTAAAGAGAG
CTTCCCTTTTAGAAATCATCTTTTTCATTTCCTCCGTAGTATATGTTGGTATCTTTATTT
GAGAAAATCTATCACTTGCAGACCATGAGCGTTGCATTGTACCGTCTATAAATTCAAATA
TAAGTAACTGAGTAGATTTTTGAGTCTGATTTTGGTCATCAACGTCCTTCAGTTCAAATA
TGTCATTTTCCTTCTGCTGAAAGCCGCCATTATTGAAGTCAAAAATCTTAGTTTCAGTAT
AAATTTGGTTCTCATCAATATACTTGAAAACACATTCTCTTGGCATTAGCGCCATAACCA
TGGCTAGGTCTTCTTTCGTCACAGTTCTTTTCAAAGCAGTTTCTATAGGTCCACAAAGTG
TTTTAAATGTAGGCACAACATGCTTTCTGCAAATCAAAAAGGTGTAAAGAGTATTAAGGC
GGAAAAAAAATTGTTCAAAATTTCTAAAGGCATCGGTCTTTCCACTCCCTTGACCTGCTG
ACTTCAGTTTCTTTTTTATAGGTCCTTCCTCCATTTTTCCTTCTCAAATGAACATTTCTT
TTCTACGACCTTAACCATCTCAATATGTATAACGGTTCTGTTTTATAACGAAAAATGAAA
AAGTTATTTTTTTCCTTTAAAAATATATAAACTTGAAAAGCCAACATAATAATATAAGTA
CAAGCGAAGAAGGTTTTAACGAAGAGGTAGAAAATTTGAAGAAAGCAATAATCCAAGATT
AAAATAGACGGTATGCCTTTCTCTTCTGAGCAATTCACAACCAAATTAAATACGTTGGAA
GATTCCCAAGAATCTATTTCCAGTGCCTCAAAGTGGTTGCTTCTACAGTATAGAGATGCT
CCCAAAGTGGCAGAAACGTGGAAAGAATACATGTTAAGGCCTAGTGTAAACACAAGAAGG
AAGTTATTGGGTCTTTACTTAATGAATCATGTTGTTCAACAGGCTAAAGGTCAAAAAATT
ATTCAATTTCAAGATTCCTTTGGAAAGGTGGCAGCAGAAGTATTGGGAAGAATTAATCAA
GAGTTTCCGAGGGACCTAAAAAAGAAGTTGTCAAGAGTTGTGAATATACTAAAAGAAAGA
AATATATTTTCCAAGCAGGTAGTCAATGACATAGAAAGAAGGCTTAAAACCGAGAGCTCA
CCAGTGGAAGCGTTGGTGTTACCCCAGAAATTGAAAGATTTTGCTAAGGACTATGAAAAA
TTAGTGAAAATGCACCATAATGTTTGCGCGATGAAAATGAGATTTGACAAATCATCAGAT
GAATTGGATCCATCCAGCTCAGTTTACGAGGAAAATTTTAAAACAATAAGTAAGATTGGG
AACATGGCTAAAGATATAATAAATGAATCAATTCTAAAAAGAGAAAGCGGTATCCATAAA
CTGCAAAGCACACTGGACGATGAAAAAAGGCATCTAGATGAGGAACAGAATATGTTAAGT
GAAATAGAATTCGTTTTATCTGCTAAAGACCCATCCAGATTAAATAAAAACGTTGATGAA
GACAATATTATTCCTACGTATGAAGTGGGGGATGGAGATGACGATGACGATGATGGTGAT
AATGATGATGATGATGATGATGATGATGACAAAAATTACGATGATAGATCCAATGACAGC
AATTATGGCGTTACTAATATTAGCACCACAGATAAGAAGAATGAAGTTGTAGAAAAGACA
GATAGCGAACATAAAAACTCTACTCATAATCCTAGTGACAATCAATTTGGTATGAAACGA
ACACATGATATGATAGGTCATGATGACGCTAATGACATACCGGAAAAAAAGGTTCATCTT
GATTCGAAGACGAGTGAAGATGGTACTTTCAACAGTGAGGATGGACATTATGAGTTAGAT
ATAGAAGGCCACGTCGGCGCCCAAACCGACGAAGGTGTTGAGAATTCCGGAGGGGTTTCT
TCTAGTATACAAGACTTGTTAAGTAAGCTTGCAAATTAATATGATGGTTGAGTAAAAAGA
AAACAAGGAGATAACTTATACAAATATATAGTAACCCGTTTAAGTCCAGTCTTTTTTCGT
AACTATTTGCCCATAGTTTATTTCGTATTCATCTTCACTATTTCCTCGACAAAAAAGATG
CGCACCTAAACTACATGGACACCTATGCAATGCTATATAGAATATGAATCGCCAATGCTT
TTTATTATATCATCGTGCAAACTTTTAGTCTGCTCCTTTTCAAGGCCCATGATTTCTTGC
ACCAATTTTTCAAGAGACTCTAGTCCAAGCTCAGCCTGAGTTCTTCTACCTATCCTGTAT
GATATCACTTCCCCGTCGGTATCGGATTTCTCCTCCAATCTGACTATATATTCGCGCTTT
TCTAAACTTTTTATCAAATCTTCAATAGTAATGTTCAGTATAGCAATCTTTGAACCATCG
CTTGGAATGCCAAATGTCTCTAGAAATTTGATCAATTCCTGATGTAATATGTTATTCTTA
GAGAAGAAAACAATGCATAAAATGACGCTCAAAACACCCTTGTAAACAAGATCTCGATCT
GTACTCAACTTGCTTTCTAAGGTATTGGAAGTTCCTGAAGCTATATCGTCACCAATATAC
TCTCCGGTAACTATTAGCTCTTCATAAGTGTGAGCGCTTTGTAAAATCTTGAAATCGTCA
AAATTTTTTGAGTGCGGGACATTGTTTAGCAAGATAAATTTCTGGGCTCTATGTCCCAGT
GGCTCAGGCATTGATTTATTTGTATTGCTATTGCTTCCATTACCGCCAGCGTTCATATTA
TTTTTTGACGGCAATCCTTGTAATTCAAACCCATATACGTTATACAGTATAGCATTTATG
TCCATAAACATTTTACTAAAAGACGGTTTTGCTATGTTTTCCTCGCGAGCAGCTTCATGT
ATAACAGATTGCAACTTGTTTCTTGTTATGATCGAATTTTGAGATTCTCCTCTCGATAAA
ATATACCTAACCATTTTTCTAGCTACAGGATTCTCTTTAACGATCTTGGCCACGGCTAAA
TCTTCTGTTAAATCCACATCGCTGTCATTATCTGTAGAACTCATGCTAATGAGAAGCTTA
TGTTTATCGAACAACCTTCCCTTGTAGCATACTGATATAGGACCCCTTCAATCGAAGTTG
ATAATAAGCGCATTACTCTTCATTGAAATTTTTCTTCACGTATATCGCGCTGTTAAAGGA
GAGGGCCGCATGCATGTAATACTTGCTATTCTTGAGTCAGAAGCCCACACTAAGTGACCT
GTGAAATCAAGTTGCTGCTTCAAGATATCGTCCTGTACTGGAAAAAAATACTAGTAGGAA
TTGCGTGAAGTACTATATAAACTTTTCTTAGATATAGCTTATTTAACGACACCTGAGGGG
GGCATTTAGTATTCTAACTCACCCGCAACGTGAGGCCAAAACGATTCTGCAAATCGCTTC
TGCTCCATCGACTCACATCCACCTCTAATAGCCAAGTAACATCTTCTGTCTAATGGAATG
TTCCATTCTCCACAATTTCCGCCAACCATTATTCCTCCTGCTTCCTCAAGAATACACCAA
CCGGCACAAACATCCCAAGCCCAGCAGCCACCTTCCCAATAAGCATCAAGCATGCCGCTC
GCTACGTAGCATATGTTCATGGCAGCACTTCCTGCACTTCTGAACCCGTGAACAAAGGCG
CCGGACTCATTTAGTAAGTTTTTATAAGTATTCATTTTCTTATCAAAGTTTCCTTGGGAA
CCTTCAGTTCTTTCCGAACCTCCTTCTAAAGCAATTAAGGATTTTTGCAAAATCAATGGC
CTTTTTGAAACCTTTATCTCCTGATCATTTAAGAAAGCTCCATTGCCTTTGGAAGCATGG
AATAGTTGGTTTAAGTGAGGATTGAAAACCACACCAACAACCGGCTTCCCCATTTCAGCT
AAACCTAGAGATGTACAACTATAGGGGTAACCGTGAATAAAATTAGTAGTACCATCGATG
GGATCAACAATAAATGTAGGGCCGTTAGTTATTTTCGTGACACCTTTTACATAAGTTTCT
TCTCCGATAAATTTGAAACTGGGATACTTGGCCATTAAAGTTTCCTTGATTATAGATTCA
ATTTGTTTGTCTAAAGCAGTTACCAAATCTACGCCATTTGCTTTATCATCATATGAACAA
AAGTTTGTTCCTGCGTGCGATTTTACGAGAGGTCCTATTTTACTCCTAAGTAATTCAATA
AATGTGTTCTCCACTTCCTCTAGTACTTGCCTCGTTAATACCATCGCTTCAATCTAAGTT
TACTTTACAAGGGCTTGTGGAGCTTCAACTTCACTTATTCTCTATATTGTTTTCACGATT
TTTTCTCCCCACGATTTCATATGTAATGAAGCAGGGTGCTTCACGGCGTTATCACTCGGA
ACACTGACGTTCTTTATTAAGAATTACCGTTTTAAGGGAAATAATAAGAGGTCACTTAAT
ATGACTGTGAGAATCCATTTTTGTAGTTTTTTAGTTACTGGCTTTGGAATGTCAATATAA
CTGTGATTGACTTCCCTTTTTTTCGCTTTATGGGTCTATGATGTGCGCAAGTTGTTACCT
TTCCGTAGAGAGTTCGGAGCTGATGCATTGTAAAGTTTCGTTTAATTCATAACAGAAATT
CGTAATTATTCAGTAAGACATAAAACTTAAGGAACATATCACCATGTTGAGAGCGTTCCG
CTGTTCTATACATACTTCGAGGGTATTGTTACATGATGCTGGAGTGAAATTAACTTTCTT
CTCAAAGCCTAATTGTGGGTTATGCGATCAAGCAAAGGAAGTGATAGATGATGTATTTGA
AAGAAAGGAATTTCATAATAAAGCAGTTTCACTAGAGATAGTCAACATAACTGACCGAAG
AAACGCAAAATGGTGGAAGGAATATTGCTTCGACATACCAGTACTTCATATTGAGAAAGT
TGGTGATCCTAAGTCGTGCACCAAGATCCTGCACTTTCTTGAAGAAGACGATATCAGTGA
TAAAATAAGGAGAATGCAATCTAGATGACCTCTTTTGTTTTTACTAGAGTTACAACACTG
TAAATATTTATAAGCTATGAATAAGTATATACCTCAAAAAACTATATCTACGCTAATTTT
ACTATGCATACTTCTTACGCAGGGAACAAAATGAAATGTATTCGCACAAAACGATTTCAA
ATTTTCCATTATCCTCTATTTCCTTCTCCTTTTCTTGCTTATTTTTAATGACTGGTCTTC
GTCTTCTACTAGTAGTAATTTTTTTCTTGAAGAAATTGGAGGTTTCATGCAATTTGAACC
CTTCTTGATTTTTCCTCTCACTGGTTTAATTTGGATTGGGGAAGGGTTGGTTAATTCTAG
GTCGTCATTTGATGATGAAGAAAGATCGAACTCATCGTTAAATTTGGATGTTTCTTTGGA
TGAATTAATTCTTGACTTACTTATATGATCCACCTTAGGACACTTTTTCATAGGAGAGTG
AATGGCAGCAGAGTTATTAGGAAATAAGTTGGACGTCGTAGCATTTTTTTTGGGTGAATC
TGATGGTTTGGTAAAATTTTGTGTACCTTTTTTACTAGGCTCGTTCCGTTTATGGTTTTT
TATCTCTTCTAGCTCTTTAATCTTCTGTTCTAATTCCCTCTTTTGCGATTGCACCTTTTG
CTGTAAATTTTTGGTGACTTCTTCCAAACTTTCGAGGTTATCTTGAAGTTCTAACTTTTC
GGCTGTTATATCTTGCTTCTCCGATTTCAGAACTATCACTTGCTGTTTTAGGGTTTTTAC
ATCGCTTAGTGATTCCTCAACACCAGTTTCCTTCTTTTCTAAACAATTTTTTAAGTGCCT
ATTCTGCTCTTCAAGCTCCAATTCATGAGCCTTCAGTTGTACTACTTCGACGTTTAGCTT
TTGTAGCTGCTCATTGTTCTTTTGGAAAGCCTCCAGTTTGGTTGTATGATCCTTCTGTTC
ATTTTCTTTGATTTCTACTAGCTGTTGAATTCTTTGCTTCAGAGTATCGTTTTCGGAAAC
TAAAGCCTTCACAATTTCATTCTGAGAAGATATTTTATTTTCGTAATTTGATTTTGTTGT
GATGTTCAAATTGTTGAGTTTTTCTAGTTGATCCTGGACTTTTTTCAGTTCATTAGAAAG
GTCCTCATTTTTTTCAGTTAAACTTTGTTCTTTGCCAGAAATTTGTGAAATTTCGATATT
CTTCGCCTCCAACTTTTTGACCAAATCTTCATATTGTGCTTCTTTAGTACCAAGAGAGCT
AATAATCTGATTTTTTTGTGAAGACAAAGTTGACCTTTCACTCTCCAGATGTTTTATCCT
TTCTTCATACTCATTCGACTGAACTATTTCTGCCTTATATGCCTTCAGCAAGTTTTCCAA
ACTCGCGTAATTTTGGGCTGTTTGAGACGCATCATCAAGAAGCTCTTGCCTTGTGTTATT
CATTTCACTTACCAAAGCAGTTTGAATATTCCCTGATGACGTTAATAGTTCTTCTTGTAC
TCCCATTATAAGTCCTTTTTGCGTTACACTCAGCTCATTTATTGTTGTTGCCATTTCATC
CTTACTGGATGACATTTTTTGTTCAAGATTTTCTTTGATATCTTCATATTGCTGCTTTAG
CATGGTCTCTGTATTACTACTCAACTCTACAGTGGTGTTCCTCAAGCCCACGTTAAGGGT
ATCTTTTGCAACATCGAAGTGCTTTTGTAATTTGTTTTCAAACAAATCATGAACTCTTTC
TTCGAATTTGTTAAATTGCAGTAAATGGTGTGCTTTATCTTCTGAAAAGAAATTCTCAAT
TGATTTAATCATTTCTTCTCTATTCTTTCCCATTTCCTGTATTAAGGAACTGTTTTTGAT
TTTTTCTTCGCTCAACTGACCTGAACAATCATCTAGTTCTCTTTTCAGGTATTCAATCTC
TTTACCTTTTTTCATTAATTCTGCATCCGCCTCCTTTTTGTGCTTCCCTAAATCATTTAT
TGTTTTGTTCAAGTTTTCAATACTTGTCTTAAATCCGCTTATCCTTCTCTGATATAGTTG
GTGGTTTTGTCTTAAATCTTTCAATTTAGTTTCTTGATTATTTTTATGGCTCGTCAACGT
TGCAATCCTTTCTTGAAGAGTTTCTAAACAAGATTTATATTTTCCGACTTTTTCATTGAT
CTTATCAGAATTGGAAGCATACGACTGTAGTCGAACTTTCAACTTTGCATTATCCTGTTG
CTGCTTTTGTAGCTCTTGCTTTAAATTTGAACATATTCTTTGAGTGTTTGTGAAGGCTTC
TAACAGGACATCATTTGAAGATGTACTAGAATTATTGATGGACGTGTGCAAAGGAGCCTT
TCCATTTGTCATAGTATATTCATGCATTTTACTATCCTTGAGAGTTGTCTCAGAATCGTT
AGGATCCCCATGACTTTCTTTCGTTTCTTTTGCTACTCCTTCACTCACTTCTCTTACTTC
TGTAATTTCAAAATCTTCATCAGTATCATTTTCAATTGCGGCAACATCATTTTTTAAAAT
TCTGTTGTATTGGTCTGTTGATGTTGTTTTTTTTGGTGAACCTATTTCCATATCATCAGA
ATAACCATGGTTTCTCTGACTAAGGCTCATACTTGTAATCAGTTCTTGTTCGGTAGAAGT
TTTGTGGGGTTTTTTTGAAGGTATCATCTCCCTCTATAGAAGAACCCACGTCTAAACAGT
TGGATGAATTCTCGACAACAGTATTAGCGGAAGAATCTGAATCTACATCTCTAACTCTCA
GCTTAGCGAAGATGTTTGGTCGAGGCTTGAATCCCATTGAACTATCTCTAAAAAAGTTTG
ACATTCTCTAAAAATTTAGCCGCCGAGGGTATTTTACTTCCGAATCTCAAAGAAAAAAAT
ATGCTTACTGTTAATCCTAAAAGAGGTGACAATATTCAGCTAAAACTTTCAGAGACTTGC
AGTTCTCTTCAAGGCGGTCAACTTTAACAAAGAGGTAGCAGATTGTTTTCTTTATTTGTT
CGCTATTTACAAGTAAAGAAGCAGCTCTTCATAAAGGGACAACACGGCTTATAGCATTTT
TTACGAAAAGTTTGACCGTTTAGAACAAATATTTAAAAACTAGTACTCGATTTCTGGCGC
AGCAAAAATATAGCATTATATCCGATAAACACAGTTGTGATCTGTCTTGTGATCGCATAC
TCTGCAGATAATCAGTTGAAATAGCAGCTTTTAAGTGAGAATCTTATTCTTAGTCTACAT
CGTTGCATTGTATCAGTCACAGGTACGGAGAGAAATTATACTTTTTGATTTCATTCAATG
TAGTTTCTTTTTTACATTAAATATAGTTTTCCAGTAGTGCACTATTATTAAGGCGCTTCT
GTTTTTAGTCAACACTTTTTCAGATAGTACCTTTCAGGTGGTTAGAGTGCGATCCCTTTA
AAAAAAAGTATTCGTCAACGATGACAGGGTAAAGAATAAATGCAGCACGCCTGGCGTATA
CTGCTATAATTGTACATCATGTTATCGGCGTTGATTCTCAATTGTTTGGTGATTAGTTTT
TATATATAGATAGAAACCCAACGTTGGATAACCTCACGACTAACTTTTTTGTATTTTAGA
AATAATTTGTCGATCGGTTGTACATTTTTGTCATATATTATCTAGAAACGTTAGGGAATA
AACTGTTATCTAGGGTCCACTAACATACGCGCAGTTCGGAAATCAGCAATCATCACTTAA
AGGACACCTGCTATAAACTGAATTGTGTCCAATTTTTCGAGTAGTTAGCAGTTCAATAAA
GGGCACATTATCAATTGTTAAAGGCAAAGAATCAGAATTAAATCATAGCAAACGACCAAA
ATGAACAGAGTTTCGTTTATTAAAACGCCTTTCAACATAGGGGCGAAATGGAGATTAGAA
GATGTCTTTCTGCTCATTATCATGATACTTCTTAACTACCCCGTGTATTACCAACAACCG
TTCGAACGTCAGTTTTACATTAACGATCTCACTATATCGCATCCTTATGCGACAACTGAA
CGTGTAAATAACAACATGTTGTTTGTTTATAGTTTTGTCGTGCCATCTTTAACCATATTG
ATAATTGGTTCTATTTTGGCCGATAGAAGACATTTGATTTTTATTTTGTACACATCTCTC
CTTGGTTTATCACTCGCTTGGTTCAGTACGAGTTTCTTTACAAACTTCATCAAGAATTGG
ATTGGAAGACTAAGACCAGATTTTCTAGATCGTTGCCAACCTGTTGAAGGCTTGCCATTG
GACACTTTATTTACTGCAAAAGATGTGTGTACGACTAAGAATCATGAACGTCTGTTGGAT
GGGTTTAGGACAACTCCGTCAGGTCATTCAAGTGAAAGCTTTGCAGGACTGGGTTATTTG
TACTTCTGGCTATGTGGGCAACTTTTGACTGAATCACCGTTGATGCCTTTATGGAGAAAA
ATGGTGGCCTTTCTACCACTGTTAGGAGCTGCACTAATTGCTCTATCCAGAACTCAAGAT
TACAGACATCATTTCGTCGATGTAATTTTAGGGTCTATGTTGGGTTATATAATGGCACAC
TTTTTCTACAGAAGAATCTTCCCACCCATTGATGATCCTCTTCCGTTCAAACCATTGATG
GACGATTCAGATGTCACCCTGGAGGAAGCAGTGACCCATCAGAGGATCCCGGATGAGGAA
TTACATCCTTTGTCCGATGAAGGTATGTAAGAATAAAAAAGAATATATACTCCACATGAC
ATACGAAATATACGTATTTATTGTTCTGTATGGAATAACAGCGATTACATAAAGATGACA
TGTTACTTCTTTATTCAAATTAATCTTGACGGGCAAGGGCCTGCTTGTTATTATATCTAA
CAATCCCAACATCACTTTACACGAAAGCCTTAGAAGTTTATTATTTGTTTTAAGTTGGAC
TATAGTGATGTAGGTAGTTTCTTAGGAAGCAGTTGAGTAGCTGATTTTTGAGGTAAGAAC
CTGGTGTAATCAATCTATAAACAGCCTAAAATCTTTTTAAGCAAATTTACTTTTACATTT
ATCTTTATCTTCTTTCTTACAAGAAGTTATTTTCATTACAAAAGGACATTAAATACACTA
AATTTTCAATCTTTACATTGTTGGAAAGCCTCGTTATCTTTTAAGATTTTATAAGCATTG
ATTTTTTTTTTCAATAATTTTCCGTTCCCCTTAACACATACTATGTATAAATGTCATTGA
GTCATCTCACTTTAGATCAATATTATGAAATACAGTGCAACGAACTTGAAGCGATACGTT
CCATTTATATGGATGACTTTACTGACTTAACTAAAAGAAAGTCTAGCTGGGATAAGCAGC
CACAGATTATATTCGAAATTACGCTTCGATCTGTTGACAAAGAGCCGGTTGAATCTTCTA
TAACATTACATTTTGCGATGACCCCAATGTATCCTTATACCGCTCCAGAAATAGAATTCA
AAAATGTACAAAATGTAATGGATAGTCAATTGCAAATGCTGAAAAGTGAATTTAAGAAAA
TCCACAACACCTCCCGAGGCCAAGAGATTATATTTGAAATTACATCTTTTACTCAAGAAA
AACTGGACGAATTTCAAAATGTGGTAAATACACAGTCCTTGGAAGATGATCGATTACAAA
GAATCAAAGAAACTAAAGAACAATTAGAAAAGGAAGAAAGAGAAAAACAACAGGAAACAA
TAAAAAAAAGATCAGATGAACAGCGAAGGATAGATGAAATTGTTCAAAGAGAGTTGGAGA
AAAGACAAGATGATGATGATGATTTGCTATTCAACAGAACAACCCAGTTAGATTTACAAC
CACCTTCAGAATGGGTTGCATCAGGTGAAGCTATTGTCTTTTCAAAAACTATAAAGGCAA
AATTGCCTAATAACTCAATGTTCAAGTTTAAAGCAGTTGTAAATCCTAAGCCAATAAAAC
TGACATCAGATATATTTAGTTTTTCCAAACAATTTCTTGTGAAGCCTTATATACCACCAG
AATCTCCGTTGGCAGATTTTTTAATGTCTTCTGAAATGATGGAAAATTTCTACTATTTGC
TATCTGAAATTGAATTGGATAATAGCTATTTCAACACAAGTAATGGAAAAAAAGAAATAG
CAAATTTAGAGAAAGAGTTAGAGACGGTGTTGAAAGCTAAGCATGACAATGTGAATCGAT
TGTTCGGTTATACGGTGGAGCGCATGGGGAGAAATAATGCAACGTTTGTTTGGAAAATAA
GACTCTTGACAGAGTACTGTAACTACTATCCATTGGGAGATTTGATACAATCTGTTGGAT
TTGTTAACTTAGCAACAGCGCGTATTTGGATGATTAGATTGCTTGAAGGATTGGAGGCCA
TACACAAATTGGGAATTGTTCATAAATGTATCAACTTAGAAACCGTGATCCTGGTGAAGG
ATGCAGATTTTGGAAGCACTATTCCCAAGTTAGTTCACTCCACTTATGGCTACACTGTTT
TGAATATGCTATCGAGATATCCAAATAAAAATGGTTCTTCGGTTGAGTTATCTCCAAGTA
CATGGATAGCCCCTGAGTTGTTGAAATTCAATAACGCCAAACCTCAAAGATTAACTGATA
TTTGGCAACTTGGTGTTTTGTTTATCCAGATAATCAGTGGATCTGATATAGTGATGAATT
TTGAAACGCCTCAAGAATTCCTAGATTCAACAAGTATGGATGAAACTTTATATGATCTTC
TTTCGAAAATGCTTAATAACGATCCGAAGAAAAGATTAGGAACATTAGAACTACTGCCCA
TGAAATTCTTAAGGACCAATATTGACTCTACAATCAATCGATTTAACTTAGTTTCCGAAA
GTGTCAATTCTAATTCCTTGGAGTTAACTCCTGGAGACACCATAACCGTTCGGGGCAATG
GAGGTAGAACACTTTCACAATCGAGTATACGAAGAAGATCATTTAATGTTGGTTCCAGAT
TCTCTTCTATAAATCCTGCAACGCGATCACGATATGCTTCTGACTTTGAAGAGATTGCAG
TTTTAGGCCAGGGCGCATTTGGACAAGTTGTCAAGGCACGTAATGCTCTCGATAGCAGAT
ACTATGCGATCAAGAAGATTAGGCATACAGAAGAAAAGTTATCTACTATATTGAGTGAAG
TAATGCTGTTAGCAAGCTTAAATCATCAATATGTTGTGCGTTACTATGCTGCATGGTTAG
AAGAAGACAGTATGGATGAAAACGTTTTTGAATCAACTGATGAAGAAAGTGACTTGAGCG
AATCTTCCTCTGATTTTGAGGAAAATGATTTATTAGATCAAAGCAGTATTTTTAAAAATA
GAACAAATCACGATTTGGATAATAGTAACTGGGATTTCATATCGGGGTCAGGATATCCGG
ATATTGTCTTTGAAAATAGTTCTCGTGATGATGAAAATGAAGATTTAGACCATGATACTT
CCTCGACTTCCTCGAGCGAAAGTCAAGATGATACTGATAAAGAATCAAAGAGTATCCAGA
ACGTTCCAAGAAGGAGGAATTTTGTAAAACCGATGACTGCTGTTAAGAAGAAAAGTACGC
TTTTTATTCAAATGGAGTACTGTGAAAATAGAACGCTATATGATTTGATCCATTCTGAAA
ATTTAAATCAACAACGTGATGAATATTGGAGGTTATTTCGACAAATTTTGGAAGCACTGA
GTTATATACATTCCCAGGGTATCATTCATAGGGATCTGAAGCCAATGAATATTTTTATAG
ATGAATCGAGAAATGTTAAAATCGGTGATTTTGGGTTAGCTAAGAACGTCCATAGATCTC
TGGATATACTTAAGCTAGATTCACAGAATTTGCCAGGCAGCTCAGATAATTTAACATCCG
CCATTGGTACAGCAATGTATGTTGCTACTGAAGTTTTAGATGGTACAGGTCACTATAATG
AAAAGATTGATATGTATTCACTTGGAATCATTTTTTTTGAAATGATCTATCCTTTCAGTA
CAGGTATGGAGAGAGTTAATATTTTGAAAAAGTTACGATCAGTGTCGATAGAATTTCCTC
CTGATTTCGACGATAATAAGATGAAAGTTGAAAAGAAAATTATAAGGTTACTCATAGACC
ATGATCCCAATAAAAGGCCTGGTGCTAGGACATTATTAAATAGTGGTTGGCTTCCTGTGA
AGCATCAGGATGAAGTAATCAAAGAGGCTTTAAAAAGTTTGTCGAATCCTTCATCCCCTT
GGCAACAGCAAGTTCGAGAAAGTTTATTTAACCAATCTTACAGTCTAACAAATGATATTC
TATTTGATAACTCAGTTCCAACATCCACTCCTTTCGCAAACATTCTCAGGTCCCAAATGA
CAGAAGAGGTAGTTAAAATTTTCAGGAAACATGGGGGAATTGAAAATAATGCTCCTCCGA
GGATTTTTCCAAAGGCCCCCATATACGGTACGCAGAATGTATATGAAGTGCTTGACAAGG
GCGGTACCGTCTTGCAGTTACAATATGATTTAACTTATCCTATGGCTAGGTATCTATCTA
AAAATCCAAGTCTGATTTCTAAGCAATATAGGATGCAGCACGTTTACCGACCTCCTGATC
ATTCAAGGTCAAGTTTGGAACCTAGAAAGTTTGGTGAGATTGACTTCGACATAATTTCAA
AATCTTCCTCAGAGTCAGGTTTTTATGATGCAGAAAGCTTGAAAATTATCGATGAAATAT
TAACCGTATTTCCTGTATTTGAGAAAACAAACACTTTTTTCATATTAAATCATGCTGATA
TTTTGGAGAGTGTTTTCAACTTTACAAATATTGATAAAGCCCAAAGGCCTCTAGTTTCAC
GAATGTTGTCGCAAGTAGGCTTTGCAAGGTCCTTCAAGGAAGTAAAGAATGAACTAAAGG
CGCAACTGAACATATCTTCTACGGCATTGAATGATTTGGAGTTATTTGATTTTAGACTGG
ACTTCGAAGCAGCCAAAAAACGCCTGTATAAATTGATGATTGATAGTCCGCATCTAAAAA
AAATTGAGGACTCTTTGTCCCATATATCAAAGGTTCTCAGTTACCTAAAACCCTTAGAAG
TTGCAAGAAATGTTGTGATATCTCCTTTGAGTAACTACAATAGCGCTTTTTACAAAGGAG
GTATCATGTTTCATGCAGTTTATGACGATGGATCCTCACGTAATATGATAGCTGCTGGAG
GGAGGTATGACACTTTGATATCCTTTTTTGCCAGACCATCAGGAAAAAAGAGCAGCAATA
CTCGTAAGGCTGTAGGTTTCAACTTAGCGTGGGAAACAATATTCGGTATAGCCCAAAACT
ATTTCAAACTCGCTTCTGGAAATAGGATAAAGAAGAGAAATAGGTTTTTGAAAGATACAG
CTGTTGATTGGAAGCCAAGCAGGTGTGATGTATTGATATCGAGTTTTTCGAACTCTTTGT
TGGACACAATCGGGGTTACAATACTGAATACATTGTGGAAGCAAAACATTAAAGCGGATA
TGTTAAGGGATTGTTCCTCGGTGGATGATGTCGTTACTGGCGCTCAACAGGATGGTATAG
ACTGGATTTTGCTGATTAAGCAACAAGCGTATCCACTAACCAATCACAAGAGAAAGTACA
AGCCATTAAAAATAAAAAAATTGAGCACTAATGTTGACATAGATTTAGATCTTGATGAGT
TTTTAACCTTGTACCAACAAGAAACTGGTAATAAATCTTTGATCAACGATAGTCTCACTT
TGGGCGATAAGGCTGATGAATTTAAAAGATGGGATGAAAACAGCAGTGCCGGTAGTAGTC
AAGAAGGTGACATAGATGATGTTGTTGCTGGTTCGACTAATAATCAAAAGGTAATTTATG
TTCCAAACATGGCTACAAGATCTAAGAAAGCTAATAAAAGGGAAAAGTGGGTTTATGAGG
ATGCAGCCAGAAATTCTTCGAATATGATATTACACAATTTATCCAATGCACCAATTATCA
CTGTTGATGCCTTAAGAGATGAAACTTTAGAAATAATCTCAATTACTTCTTTGGCTCAGA
AGGAAGAATGGCTGAGAAAAGTTTTTGGGTCAGGTAATAACTCGACTCCTAGAAGCTTTG
CCACGAGCATTTATAATAACCTCTCCAAAGAGGCTCATAAAGGGAATAGGTGGGCAATAT
TATACTGCCACAAAACCGGAAAATCATCTGTTATCGATTTACAGAGGTAGGCCTTTAAAG
ATCTGTGCGGCGCTATAACGCATCAGTTAAAGGTAAAGTATATACAATGTCTTAGATACT
ATATTTAGGCTAGCTGATTCATCTAATTCACCGTTGTAAAGGGGGTAGGTCACCTTTCTT
ATACATATTCCTGATACTAAAGACAAATGTAGGTTTAATGAGATGGTCTACTTCTTCTCT
CCTTTCTCTACTTTCCATTTTGTATTTAATTTTTCGGTGAATATAAATGTGTGCGTATGT
TGTGTGAGGCTCCTCTAGCTCCTACGGGAGACATTTAATAAATGATCATAATATGGCGTG
AAGAATGCTTTCATTCAGAAGTTTGACTAGCACATTCGGTTTCGTATCACGATTCCAAAT
TAGACGGTTAGGAACTAGTTTATCAATACAGAATTTAGAAGTGCAAGATGGCCGTTGGAA
AGGTAAACTAGCTACAGAGAAGAAGACCAATAGGGAACACAAGTCAGTGGATACGAATAT
CAAGACAATGAAGATACTTAAAAACCCGAAGAATTCTACTCGCTATTTGAGACGAAGTTT
TGTGCCAAACCACAGAAAGCAGGAGAATGGACGTGATATTCTGGAGGATTCTTTAAGTAA
AGATCACTTAAAAGTGAAGAGTTGTATCACCATTACCACCGGAGAGGGTTATGATCTCAA
AAGATGCATGAAATTGCTTACTATGCAAGGATTACAACCGACAAATTTGATACCTGATGA
AATCGTGTCATTTAGTTATCAGGATAATGGCAATAAAGGTGACGTAATGATTTTAGGTCA
AAATGGATCTATTGTAAGCTGGGGCTTCAGTGAATCTAGTGTTCGAAACTGCATAGTGCC
TATAGTTAAAGCAGCGAGTTTAAATCCACTGAACGGAGAAGACTTTGAGACTGAGGACAT
GGATTATGTGGAAATAGAAGGGGAACAAGATTTTGATAAGCTTTCCAGTTTGGATAATAA
GGTAACACCGAGGATTGCATGCGAAAGCTTTCTTTCTGGAGATTTGATAATAATTAACTC
CTTGGATTCTGATCAAGGAATGCTAGATAAGGCGGCATTCTCAAGTGGGCTATCGAGAAG
CACCAACTTGGCAGTCCTAGAAGAAGCAATGGAAAAACATATATCAAAGACCAGAACAAT
AACAGAAAATATTTCTAAGGGAACAAAGTTAAATCTAAGGTCAAGTGATGCATTAAAGTC
AATAGGCCGCCTTTTTCTAATTAGAGGAAAGTTGAACCTCTATTCAGAACTAATTGAGAC
CCCTGATCTTTATTGGAGTGAACCTCAATTGGAAGAGATTTTTAAAAATGTTTCGAGGTA
TTTGGACATAGGCCCAAGAATAAATATTCTGAACAGCAAGCTGGACTATTCTACGGACGA
GTGTCGAGCCCTCATCTCTCTTTTAAACGAGAGAAACAGCACTTTTTTGGAATGGATAAT
TATATACCTGATTGCTTTCGAACTGTGCTTTGAAATTTATCATTTCTACCAGAAATATTC
TTCCTACTGCTCAGAACCCACGAATGATGATCTAGATGCTACAAAGTAAGAGATTTTTTT
GTAAATAAGAGTTACTTTTGTATATACACAGAACAATGAGAAAAAGTTCCACTCAGTAAT
TAATATTTTTTTACCCAACGTTTCCTTATAACGTTCTTATTGAAAAAGGGATATTATATG
AATCCACGCACCTGACCTGGCTCTTAGAAGCGACTAAATAACTACATATGTAAGAGATCT
GCTCCTGCCACAAGAGAAAGCGTTTTTTAGCGATAAAATCAAGATTTCTCATTTCCTAAT
TGCTTATGACGGACGACTTTCATTATTAGAACGTGCAAACGTGCATTAGCGTGTAATGAT
ACATACGCAAATTACAATAAAAAATAAGCATGTAAATAAATGAGCCCACTTAAAATAATA
TGACATATATTAGTTTGCACTGTCATGAAAACCCTGATAACGTGGTGTCATTTTTATTAC
ACCCGTATATTCATCAGCCCGTCCTAACCTATCCGAACGACGCAGGATGGCCACTAACAT
CGCAAATAGTGTTTTTACTTTTTCCATTTGGATGTTCTGCCCTATAATGTTACGCAGTTC
CGAGCTTCGCTGACACGTGGGAGGTGGGATATAATATTTGCACGGGTTCTTTTTTGTGTC
GTCTGGCGGAAAAAAATAGACTCGTCTCTTGTATGGCGCGCTAGTAATTTATTATTTGCG
ATGCGCAGAACCTTATCTTTTGTTTTCTATTCAGTATAAAACTTGAACGATTTCACCAGA
TGTTTGTACACTTTGACTCATTGCAGCCCAAATAGAATTTTTGTCAACTGCCATACCAAA
CTTGTTGAACTAAAAAAAAACGACAGCAATTGTTTTTCAACCTGACACCAAGATGGAAGA
TACCTCGAGGTGCATCGATGATGTACTGAAAATAGGACAACAGGAGAAGGAAATAAGACA
GGCAGAGTTTTCTGAGGCACAAGGGGAGAGAGAGGAGGTTAAGTGTATTGATTACACAGT
AGATTTGGAAGCAGGTCTTCCGCGCCACGAGAGTAGTGGAAAAAGTAATACCCTCAAACA
GTGTTATAACGCCGTTCTAGGGTTTCTCGAGGAACTCATCATCGTCATTATTATTGTGTT
GCTGTTGTACAGTTTGACAATGGTAGGTCTTTTTTATGTGATGACGATGACGAAGTTTTT
GTTTTAATAATAAGAATAATGGGATTTGTTTTCTTTCAAGATTTTTCTTTTGGATAGTAC
ATGCCTTCAGAAATTAAGCAGGGAGGCAAAAGATAATATTTTCTCATATGCATTTATAGC
CGAGCCTTTTTTTTCTTCGCAGTATGCGTTTGTTTTATAGTAATTTAATGATTTTTATGT
TTTTGAACACCGCAGTCAAGAAAACAGTAGGAAAAAAAACTGCGGGCGTCTTTCATACTG
CCTTTAGTAGTAAGTGTAATTTTACAATCTATACGTACCGATATATATACATATATTAAT
GCATGCATGTATATGTATAAGCGTTGCTTTTATTTCAGTTTTTTCGTTAATATTAGATCT
CGCGGGCATTTTCAGATGTAAGCATGGCTGCATACTTGTTTCTCTTTTCTGAATCCTCCT
TTAAAAGCTGCAGTATTTGATCAGTTATTTTCTCAATAATGCTGTAAGCCTCGTGACAAC
ATTTCATTAGCGTCAACGCATCCATTGGTAAACCACCCGCTTTGGAAACTTGTACCACTT
CACGGTTTTTGTTTAGCGTAACCGTCAATACACCATCTCGCAGTAGTTCCTCTTTCAATG
TTGCATCAATGATGGAAATTTCTGAGTTAGTCTCACCTTTTATGTTTTCCTCGGTGTCTT
GAGGATTGAAGAAAGAAAAAGTTACACATATTGGAATATGCAGTATACCTAGTGGAACTG
GCTCTCTTTCATTAACAGGATGAACAATGATCTGCTCGCCATGGACAGTTATATCTGGTT
TCTTAAAATGCATCAATCCTGCCATGACGGCGATACACGAAGCGTCAATAAATCCACCAT
CACAATCCAGGAAATGTACATCAGCTCTCACAGCCCAGCATTTACTTCCAGCTACGATAC
ATAGTCCTTCCACGTCCAATGCGCCCGACCGCCTAACAGATTTTTCAATTATTCTTGAAC
ATAAAACTTCATCTTCTCCCGTGATATTTCCATTTTCAAATTGAGAACCAGCCATGGGAG
ATATTTCTGTAGATATTACAAATAATCCTTCAAATGGCCTGTCTTCGTATGGTTGTGCTA
TTTGACAACTAATCCTGCAGTGAACTTTGGTGTTGCCCATTTTTACGCTAACATCACCAA
ATTCTTTACCAAACGTTATTTCCACGTCACGAAATTGATCAAAGGAGCGGCCGTCCAACC
TATAATTCTGTCTCAGTGCTTCTAAGATAAATTTTGACTCGGATGCGGATATCTCAATGT
CTTTGGCCATTTGTCTTTTAATCTAATGTATATTCTGAACAATTTTGCAATCACTACGTC
CTGTTGATTAATGTATCGAGACTTAAAGTTAGGAAGTTAGAAAAAAAACTTGAAAGTTGG
TAAGGTAAATACAATCTAGCAACCGTTTCCTATTCCTTTATATTCAGACATTTGTTAACA
TCATCGAGGGAAAAGTTGTTAATTTTTTCTTGAATTCGAGAAAGGAAAAAAAAGGTAGCC
CATTCGTTGGTAGTGACAATATTGTGTAATTATCTCGCACTGAGGTCACCACCACCGAGT
TATAGCATTCAAATTGCTGTTTAATTATGATACTAGCTACTTACGTTTAAAAAATCCATC
AATGGCCCCTTTTCCTATGGCTACTTTTGGTTTTTTATTTTGAACTATTTTTTTGGTAAC
TTTTTTCACTGGCAATGAAACGCTGCCATTCGAATTTAGGCCTACATTCATGGCACTTTT
CATCAGTAATTCTCTTTCAGCATTCTGTAATTCGTTCGTAGTCTCGTAGTTTTCGAGTTC
TATGAAGCTAGCTTTTATATCCGGATTTAGGCAACCACTATCCATTGTAGGTGAAAAGGT
AAGTAAATTATGGTAGGCCGCCCTTGGAATCAGGGAAACTAAAAGATTTGTAGCCATAAC
TACCTTGTAGCACTGTTTTATTTCCGTTGGGGCATTTTTAAGTGTAGGGATACTTGGAGG
AAAGTTTTCTACAATTTTTGATACCTTGCCTAACAAAAATTGTGTTATCATTGCAGATGT
GATCTTGTAATAGACGTCACCAGCTTCCTCAATGGTTTCACTAACTTTTGCTAAGCCACT
CTTGAGACGACTTAAAGAAATGTTTTCCCAATTCTTGTCATGGTTATCCGTTAAGAAATC
ATGGTAATCACGCACCGTAAGAAATTTCTCATTGGTTTTGCTGTTGCTTTTTTGGTTTTC
ACCAGTATCACTTGAATTGGAGTAATCTTGTTCATCTGCTGAAACACTGTTTCTATAGTA
AAATCCAATCAAACTAAAAGCAATATCGTATAAAGAACAAAAGTGTATTTTGCTTGAGTT
AAAAACATAACCATCGGTGGGATCAGACGTATTTACAATGAAAGTTGATTTGATCGGGTG
ATTTTCCTTAGTATAGTGATATTTATCATTTGCCAAATCTTCCTCATGTGAATACGAGGG
CCCTTTGCCGAATTGAAAAGATCTTATTTCGTAAAGTTTTCCATTAATATTTTCGAGGAG
CTCGATACGAGGTTTGGATGTAATATTGGAAGGTGGCGGCAGTGTAAAAGTGTTTATAGT
TTTCGAAGTTTCATAATCGTCTGGTAAAATTATTAGTCGTTCTTCCCCCCCAATGTTGGA
AACGGTCATGCTTTTTGTTCGAGAGGCCAGAAAAGAAAGTCAACTATTGCGACAGAATAA
GATTAAATTTGTACACGATTTGTTTCTGCTGTTGTACCAGAATCATTAACCAGATCTGAC
TTTAATTCTCATCGCGCTCGTGCTTTTGACAAACTTGTGAGAATGGAGTCTGTAGTGCCT
TAAAAGGAAAAAAACGCGTTGTGGTTATGAATATGAGATTTCATAATCCAACTATGGCAT
CGACAACATTGAAAAGATAATGAGCTGGAAGTTGCTCCATTTTTTACCTTTTGAAATTTC
TTCTTATATGTATATGCTCACTTTACTGACTAGTAAAATGTCGTGAAAATTTTTAGAGTT
CCATTTTGGCTCAAGACAATGGCGCTACGAAGAAACGCCATACTTAAATTCCCCTCATGA
ACTTAGAAATTCACGAAAGAAGCTGCATCTTTACAGAATAAATTTGTAGAAGAATTTTTC
TGTTCTTTTATGCTTTATTCGTTGCTGCTGTTGATAATCAGCGATAGCTGAATTTATTGA
ATAGAGAGGCCGGGAAACTTCGTGCTACTGTAGAACTGAGATATAGAATACATCACAACT
GGATGTATTAGACAAGTTTAATTTACTAGGAAAAAAAAGCTCAGAAACTTACAATTCTAA
TTAATGACTAGAATTTCATATATGAATCCTAATTCAACGTGAAATTGGTGGACTTTTCAA
CTTGTCACACTCAAGTAGCTCATTGTTTCTTTCTCTGCTCTTAAAAATGACAATGCCACG
CAAACATACGTGTGTTAAATAATGATATCAGCGCCAGATGTCACTGAATGTCAATACTTT
AGTTATATCTGCAACGGTATGAGAAATAGGCGAATTTTAAGAGAACTGTTCGTATTCTAT
CGTTGCTAAAGGCTACAGTATCTGGTATACAAGATATATTAGAAGTTTTTCTCGAGAATT
TAAGAATCCACAAAACCAAATTTGTTGGAGCGAATCGTAATTAACAGTGTTGATAGTTAG
TAGTTAGGTTGTAGTATTGATTAAGAGTAAAAGAAGATATTCTTATTCTAAAAGAAAGAG
ATATAAAATACACTCCGACTGGACATATTAAACCTTGCCGATATAGCAATGATGAGAGTA
ATTCTTATGGTTAATGTCACGAGATGAATTGTTATATTGCAAGCATCAGATTAATCATTC
AGGTAATAGATCATTGAGTTTACTGTACCCAGATTATTATGTAGCTACGTATCATTCTCC
AGTCTGAAACATTAAAGACGCATTGCACATCTGATTACTTCATTTGATTACTAATCGACT
ATTCATGAAGAATGATAAGTCAATATTCTCACGAATAGTAACTTGAGTTACTATAGTAAC
AATTTAAGTGTCTCTACTGTATATTAATGCAAACCCTACATACTTTTAAGTCCCTGTTGG
ACAGGGAAATGTTAAACGAGGAACTCAAACAGTATAATAGCTGAGTTAAAGATCCATTAA
TTGGAAATACTGCTATAGTCGAATGTACGAATAATAGTAGTCGCCAATTTAAATGTATAG
TAACTGCTAGACCCACTATTATGTTCATGTTTAATAAGAACAACTGGCCTGTATTTTCTA
TATTCCTCTTATATAGCATGAGGAGATTTGCTTTTATTCCAAACTAATACTACATCCTGA
CCACTGATTATTAATAACACCAGTTTTCATATTACTAATACATTATCATACATGATGCAA
AAATACTTTATAAACGGCGAAAAACAGTTATCAAATTTAACAGAATCTGAAAATGCAGAG
ACTGATAATTAATAAAATAAAAACGGTGATTTTTTAAATGAAAGAGGGAATAATGATATC
ATTATGTGGAATGATCTGCTCCTTTTTGTATTTCCAACAATTTCAGTAAAGTCGTATCTT
TCCTACCTAATAATATTGCCATAACAAATAATTTAGCCCCTAAATAGTCATAAGAGAACT
CATTGAGAGTCAAAGAAAATCATATTCCCTAACAGAACCTTGATTTGCGACCGAATAATT
GGCTTTCTTCATTACATAATGAACGTTTCTTTTAGGTTAAACTATCACCAAGGTACAATC
CGATGTAGTGTAACGGCTATCACATCACGTTCTCACCGTGGAGACCGGGGTTCGACTCCC
CGCTTCGGAGTTTCTTTTTTATTTTCTAGAAAAATTCACATGCTGATTCATTTACCGTTA
CTGTTTCACTGTGATGCTACTAGTCATATTCTTCTTATATCAATTTTTTTTCTATTGCTG
TTTGCATTACCGCAACATACGATGGGAATAAACAGCACAAGCTGTTGTGTACATTTTTCC
TCATCATATAACTACAATGTACATAAGTTAGCTTGAAAAAATTCTAGGTCTCATATTAAT
GCTTGAAATATGGAAGTATGTCGAATGTTTTATAAATAAGTCGAGAAAAATGGTTATGCT
ACCAGCTAACTTATATATATATAAGACTCTTTCATTCTTTTCTTTGTCTCTCAAACTTAT
ATTTGTTTACGTTTTGGAGGAAAACTAATTATTTTATTAATAAAGTAAACATAGCATTTC
CAAGGTGCAAACCGATCCCTACCACCAAAATAAGCATACAAGACCGTCATTTGTATTTAC
AAGTAGATAAGTTACAGCGTTAAGACAAAACTATGCTTCTAGGGGGGGGGGGACAAAGCA
AGGAAGATTAAAATGAATTCTTCAACTTAGGGGTACTTTAAGAGAAAGAATTCAATACTT
GCGTTAGCTGACCACCCCATAGTTCGTTTAGATAAGGATATGGTGTGAAATTCATAGTTG
AAGACTCTTGAGGAGGTAGGGAACATCTCTCTTCGCCCACCAAACCCAGTTTTCTCTAAT
ACTCCATATCCAAAAAAGTGTAGCTCTATGTACATTGCCAAGGTTTTCTACTGATCAATA
TTTGATGGAAAAATATGACATAAGGTATGCGTATTAGTAAACTATTAGGGAGCCGCCGGT
ACTAATAACATCAGGGCCATCTCACGCCGAGACTTACTTGGACTTTTCTCTATTGTAAAG
CGGAAAAAAAGTTATCACCCCGCCCCCTCCTCCGCTCCTCCACTAAAACGATCAGCAAAT
GGCAGAATAACGCGGTACTAACCAGTTTTTCCGTTCCTTGAAACCCAGTCATACTATGAA
GTCCCTAAAATTATTCCGAAATTATTCCCTAGAACAAGCGGGAAAAAGGTCCGGGGAAAT
GGAGTCCGTGCGAGTTTTGTTAGGATGACTGCCCCACACATTTCCTCATCTTATAATTTT
GTGGAAAAATTCATCGTGAGAGAAAATACGAGTCCATTTCTCCAGTGAAACTGCCGTAGA
CATGGAATATCTGCCATTCTACCCCTTATTCAAGTGCCTTTTTTTTTTTTTTTTCATCCC
ACATTTTATTGCTGCCTCAATCTCCATTAAGAAAAAAAATTTATATAACCAAATGACATT
TTTCCTTTCTTCTCAAACTTTGTAATGCGCCTGTAACTGCTTCTTTTTTTATTAAAAAAC
AGCATGGAGTTTTTTAATAACTTAAGGAAACATACAAAAAGATTTGTTCATTTCACTCCA
AATATTTTTTAACGTATATTGAAAGTTCTCAATAGCGAAACCACAAGCAGCAATACAAAG
AGAATTTTATTCGAACGCATAGAGTACACACACTCAAAGGAATGTTTGTTTCACCACCAC
CAGCAACTTCGAAAAACCAAGTTTTACAACGACGTCCATTAGAATCGACTAACAGTAATC
ATGGGTTTGCAAGCTCCCTACAGGCCATTCCGGAAAACACGATGAGTGGCAGTGATAATG
CTTCTTTTCAAAGTTTGCCACTATCAATGAGTAGCTCTCAATCCACGACTTCTTCGAGAA
GAGAGAACTTTGTGAATGCTCCTCCGGAGTACACTGATAGAGCTAGAGATGAGATTAAAA
AAAGATTATTGGCCTCCTCACCTAGCAGAAGGTCACATCATTCAAGCAGTATGCATTCAG
CGAGCAGGAGATCAAGCGTGGCTGAAAGTGGGAGTTTACTTTCGGATAATGCCTCGTCTT
ATCAATCAAGTATATTTTCTGCCCCCTCTACTGTGCACACGCAACTAACTAATGACTCTT
CGTTCTCCGAATTTCCTAACCACAAGTTAATCACGAGAGTGAGCCTGGATGAAGCATTAC
CCAAAACGTTTTATGACATGTATTCGCCAGATATTCTATTAGCAGACCCATCCAACATTC
TCTGTAACGGGCGTCCCAAGTTTACCAAGAGAGAGTTATTGGATTGGGATTTAAACGATA
TAAGATCGTTATTGATAGTCGAGAAGTTAAGGCCCGAATGGGGTAATCAACTACCGGAAG
TAATAACGGTGGGTGATAATATGCCCCAGTTTAGGTTACAATTATTACCACTATATTCTA
GCGATGAGACCATAATCGCAACGTTAGTCCATTCGGATCTGTACATGGAGGCTAACTTAG
ATTATGAATTCAAACTAACCAGCGCCAAATATACAGTAGCGACCGCTAGAAAAAGACATG
AGCATATAACTGGTAGAAATGAAGCCGTCATGAATTTGTCGAAACCGGAATGGAGAAATA
TCATCGAAAATTACCTCTTAAATATAGCAGTAGAGGCACAATGCAGGTTTGATTTCAAAC
AAAGATGCTCCGAATATAAGAAATGGAAGTTACAACAGTCCAACTTAAAAAGACCGGACA
TGCCCCCACCAAGCATAATACCGCGGAAAAACAGCACAGAAACAAAATCGCTTCTGAAAA
AGGCTTTATTGAAGAACATTCAGTTGAAAAACCCCAATAATAACCTTGTTGAATTGATGA
TGAGATCAAGCGCCGCAACAAATCAACAGGGAAAAAACAAAGTCAGCTTATCTAAAGAAG
AAAAGGCTACGATATGGTCGCAATGTCAGGCACAAGTTTACCAAAGATTAGGATTGGATT
GGCAGCCGGATTCAGTATCCTGAAGATACTAAAAAGAAACCTTCCGATGGTTTTTTTGGA
GACTCTTCGATTGTATCAATACTATCCCATGGACATCAGTTTTAATAGAGGAGCTCCAAA
TTCCCAAGGAATTGAGGAAGAAGCGCCAATGATTTATATATACAAACTAGCTGTTGCAGC
TTTATAGAGATTTAGTAATAAGAATTTTATGGGAACGTGGTACCGTTATCGCAGTAAAGA
GTCAAGGGTAGCGAAGATCAAACCATACGATGACGAAATACCTTTAGTTCTTAGCATCAC
CAATCGCAGACATCCAACGTATCCGTGCGCGTAATCCTTCTCTTGGTAGTTGAGCACAGC
ATACAGAAGAAGCCGCGCGCAAGCGGTAAATGTCTTTCCTCCGGCCTTCTAACCACCAAA
ACCGATCTCGGAACATGGGGGGGGGAAGGTCCTCTGAATCGAAAAACCCGAGACAGCGAG
AGGGATTTTGCAGAAAATCACAAAGATCACTATTTACTGCTCCCCTCACTTCCGCAGTCC
CCTAATAGCGGAAGATGCAATGTGTGTGGGCTCTGGGTGCCCTTTAACCACGCCCTCAAA
AGGGGGTCCTGGTTATTTTGCGATGGGCGCCTCTATAAATACAAAAGAGGAAGTGAGTGT
TTTTGTTTTGGAAGAGGGAAAGGAAAAAAAGAAGAAAATTTACTATCGGTTGTTGTTTTT
CGCCAGTATAATACAATTGATTATACATTTTGAACTAAACAGCACAGCACAATACAACAA
TGGATTCTGCCAAGATCATTAACATTATATTATCCCTTTTCTTACCACCAGTCGCCGTTT
TTCTAGCCCGTGGGTGGGGTACTGACTGTATAGTGGATATCATTTTGACCATTTTGGCTT
GGTTCCCAGGTATGCTATATGCCTTGTACATTGTCCTACAAGATTAAGCTCATTCAATAA
ACGAAAGTAACTATCAAATGAAATAAGGAAGCAGTATTAGGAAACGGTATCAACATGTTC
GGGTCACCCTCATTTTTCTTTGTTTCCTTTCTTTTTTTTTTGTTTCTCTTTCTCTTAAGG
TTTCCTCCCCCGCTGTTAATTTTAACTACGTGTGTATTTTTTAATAATTAATTTTATCAC
AAAAAAAACTTCTCATCTTTTTTGCCTTTTATCATTTTTGTACTTTTATCTTCGCTTAAA
ATACACATGATATAGACGCTTAACTATCTGTCCTGCAAGTTTGTTTATCTATATAAATAT
AGCCAGTATCATCCGTTTACCTGTGTTGTAGAGTTCCAAAAGATAGAACAGCCTTTTATC
AGATGGGTGGCAGACCCTTACCCATATTATCTCTCTTATTTTGTTTTTATTTCTCTCTAG
CCTTATAATTATTTTTAGTTTCCTTTCTGTAGCAATAAGTGTTCTTAGCAGTGGCGTTGC
GTTGCCTTGACCTTGATTATCAATTTAAGCAGCTTTCTGCTCACAAGCCACTTCAAAACG
ACTCGTGAATGATTTTTCGATCAATGATATCTTATCATAATTCGGATTTGATAGGAAATC
ATCATCCTCTTCCTCGTAGTAGGCGTCTTCCCTCCTTTCATTAACAAGTTTATTCTGCTT
CACAAATGTAACTGTACTAGTTGAATTCAAACGCCTACTTTTGTTAACACTACCTGAACT
AATATCATATTCCAGACCAGCTGTAGTATGATTGATCAATGATTCTGAGGATTCATTTAG
CATATTAATTATCTCCTCATCAATAATTATTTCCTCCTTTCCGCTTATGGGACCACTGGT
CTTTTCTTTTCCATCTGCCACCGGTAATGATGATCTATTGTAGTGGAATAACTTGCAACC
GTAATCAAGCAACCTGCACATGTAGAGGAATAGATCGATCGCGTCCAGTATGATAATAGG
CAACAGCAATACGATGACACCCAAAGAGCACATCAACTGGAAAATGCCAAACATTAACAT
CAGTCCTGATCTTATTTCGGATAATATCCCGCAGTGCCACGTCAAAGATAGTACCTTATC
AAAGGCGTGGTTGATAATAACAAGTGCTAATCGGCTATTTGACATGATCTCTTCCTTTCC
TGATGAGTTCTTGGTATCGTGATCGATCACAGTTGAACCTATAAGTTTTCTAAGCTTCGG
GAAAAAAAACATTGTAACTAAAGGCAATAATGGATGCAGATGCCTGGCAAGGAAGGAAGA
AAAAAAGACAATAGAATGCCGTTGGTATATATTCTCCGGCTGCCCCGTCAAAGGACTTCT
AAAAACTAATATCAAGAAAATCAAAAAAAAAAAATCAAAAAAAAAAATAAAGGAAAAAAA
AAGATCTCTATCTTTATGTCGGTAGATATGACACTCCCTTCACGTTTATCATCTCTTGAA
CCTTTTCTAGTTCATCTACACCGTTCCTATTATCTTTCTTTTGCCCCCTTCTCTCCCCTC
GTACATGTTTTCTTGCCTTTTACATTCCACACGCCCTACTGACAGCTATTGCACTTTGGC
GGCACCACTCAGCCAGACCGCCCGTACCCGTACGATGACCTTCCATGCAGCCACGGCGAA
ACGCAAGACCGAGCATTCGGGAATCAAGGAATCTAACTTGCATTTGTCCCGGGTCCTACT
AAGCTCTTTCTGCCGTGCAAAAGGACGTTTCGTTTCGTTTTTCATATGCTATCCATTTCC
TTTTGGGCTAACTAGGTTTCCGCGGGTTTTGTGGTCAATAGGACTCGACAAATCATTATT
TACGCGCGTGCATTTTTCGCCATCATTCTTTTCCCTTCTTGCACCACTACAATTTTCCGG
GATTGTACGATCGTAGGAAACTACTTACCGTCAGCGTTGCTCAAAAAGGCCCACATTATT
TTCTTCCGTTAGTCCTGTTTTTATATTGTCCTGAAGTTTCCCGGCGCTAACTTCCTGGCT
TTCCATTGAGTTTGAATTGTTGAGTAAAAACTAGTATGCCATTGCTAGATGAACGTCATT
TCCGCCCACACATCGACTGATGAATGACTCCATTTTGAGAACTAGATATACAACAAAGGC
AAATAAGCGCAGAAGAAGCAATGGTGGTGTCTGTTCATTGCGAGCCCAAACGCACTTTGC
CGAAAGAGTTAATAAACATTACCGCTATACACTACGTAAAACTTAATTCTTGTCTAGATG
GATGAACCTGCTTTTTTTCATCTTTAGCGTCAGCTGCAAATAGACCACAACTATCAGTGC
CAAAGGCAGATTTGTATCCACCGTCGTCCTTGGCAGGTAACCTATCTGCACTGTCACGCT
GAGCCTCCGGCACTTCAGTATTACCGCCCTGGTTCTTCCTTTCTTGATTCGACGTATTGG
TTTCGACATCTTGCTCTTCTTCTTCCTCGCTTTCGTCGCAGTTTAAAACGTCAAATAAAT
TGTTTGAAGGCTCATTTCTCTTCACAGTGACGGGAATGCGATTATTCTTCAATGACTTCG
CAACAACTTTCACAGCGGCGCCTTTTAAGCTGTTAACTCCCTTTTCTTCTCCCTTCTCCT
TTTCCTCCTCTTTTCCCTTCTCTTTTCCCTTGAGTATACTATCTTCGTTTGATAAAATTG
TATTATGGCCCTCTGCAACAGCCACGTTCCTAGTCGATTCGGCGACTTCTCTATTCGATC
CGGGGGTGCTAATGTTGCCAATGTGTTCGGCCAAAGAACTTAGTTCTGATTCAATTTTTG
AAATTACCATGGAGCCATTTATTCCTTGACCAGAAAATTCGTCTTCAATATCATCGAATA
TTTCACGTTGCAAAATCTCAGACACATTTATTTTACTATAGTCTTCCACACTTATCGGCT
TCATTGGTAATGCAAAGTCAGTGTTTTCCTCCGGACTTGAGTAGTAGAGTAAAGAATTGA
ATGCCGGCTCCAAAACCCCTTGGGAGGCAATTAAAATGGCTTTAATTAATGTATCATCTA
CTTCTGGAAATGCTATCTTCAATTCTTTCAAGACACATAATTTCTCTACTGAGGAAACTA
AATCGCCTATGGTGGGATAATCGAGAATATTGCTGTCAGTTTTCGTGTTTACATGTTCCT
TTGTAATTAATGGAAAGTCAGTTTTCGGGCTACTTTCTTTTTCTTCAACGTTTGTATAGT
CTTGCGATGGAAGCTCCAATCCCGAATTAGTGTTTTTAATATTCTCTACTTTTAGAAAAG
AGGTTTTAGCAGCATTATTTTCTTTTCCCTTTCTATTTTTCTTTCCCATGTTTGATGCTT
CTCTTACTTGTGTTTAAATACCAGCCAAAGTCAAGTAGATAGTAAACCGCAAAAGGAAAG
CCATTTTAATTCTGGAGCTCAAATATCCATTGCTTTATTTCTACCCGAAAATGGTTTTGT
GACGGCAATGATTACTCTACTCGAGCCGCCCGTGTTATTGGAACTTTTCTTTCAGCCACG
CGAAGACTAATTTTTATGACGGCACAACTACAAGAGTTCTAGTGAACAGACCTGAATGTT
ATAAAGTAGCGTTCCAAAAACTCTTATACATTGAAATAAAAGGGTATGCTAAAAGAATAT
TTTTAAGTATATTATACTCTGTTGGCTTTCCTACATACGGTTTTTCATAGCTCTCAATTT
ATCCATAATTTGAGCTCTGTCCCATGAATTATTCGTATCTCCGGCAGCTTTTTGGACCTT
TGGATCTTCTAATCTCATGAATGGATTAAATTCTACCTCATCTTTCAAAGTGAACCGCCC
TGCTGTGACTTCATGCTTGGAGCAGAATTGTTCTAACTCATCCAATGCTTTATTTTCACC
AACTTGCGGGTAAATCTTACGAACAAACTTTACATTATCACTTGTGTATTCGTGTCCTGG
ATAAACCCTCGTTTTACTCCAGTTCTGCCTGCCCACAGTTTCTAAGATAGAATTGTTCAG
AGCTATATCCATTTCTTCGCCTGTACCCTCAAAAAACCTACCGTAACCAGCGGTAAATAG
TGTATCGCCAGTAAAAATGCAGCGCTCATCTGTTGTTGGATCTTTCACATAATAACAGAT
AGAGTCTCTGGTATGGCAGGGCGTCCTAATACAAGTAATCTCTAAGTCACCTAGGTGTAA
CTTTTTCAAATTCTCCGGAATTATCGTAACCTTTGGGCAGTCCTTTGACCCTCCTATAAC
CTCAACTTTTGAAGTTGGATTTTTCTCTTTTAAATACTTCAAGATATCAGCGTTACCATC
TGCATGGTCATAATGGTGATGTGTATTAACAATTGCTTCAACACTTATTTTCTCATCCTC
AGTCAACTCTGGCAGAACCTCAGGAGGCTCTGCTGGATCGATTAGCCACGATTTTTTATT
TTTACTGTCGGACAATAGATAGCAGTAATTAACACCACCAGACTCCCATCTCATTTTAAT
CGATTTAACCTGCATTTTTTGTCCTCCTTTTCTTGTGTTTTTGTGTTGTCTTGCAGTCTT
CCCTTCGATATTGGTAAATCTAGCAACTTATCTAAGAATACTAAAATTTTTCTAAGAGGG
ATATAATGGGTTTTTAAATCGGTAAAAAAATCCTTATTACCTCCATAATATCCCTTAAAA
CTGACGGGTAATACGACTAGTAGACTTACTGAAAATACATAGAGTAGGAGTAAAATATAT
GAATTTACTAAAAAATTGATGAATATTAATTATTATTATTGTTATAAATCTATATGCTCG
TGGATTTTTTTAAATAAATTAGACTTATCTGTTATTTACAAGACTTCTTCGTTTGACATT
AGTCCGGCCTGTGATTCTATGTCTTGCTCACCTGCAATAGCCCGCGTAGAAAAAAGCCTT
GACCAAAAATTCCCAATCGAAAATTTGGACTTGAAATCTGAAATCCCATGTGATTCAATA
TCCGGTGGAGTCCACTTCTTCAACATCAATGAACTTAGAACGACACTGGCCGAGCTGAAT
GCCATCGCTAAACCGGCGAGCATTGGAGGAAGAGTTATGCCCCAAGGAATGAGCACACCC
ATAGCAATCGGAATCATGAATATATTATAGCAAAGTGCCCAGAACAAATTCAGCTTTATT
CTTTTGAACGTTTTTAGTGAAATATCGATGGCGTTGGCCAGTCCTCTCAAACTATTAGTA
TTCAGATCATTACCGCACAGTATAACAATATCAGCTGCTTCAATAGCAATCTCCGTACCT
GTTGAAATGGCAATACCTAGATCACTCAGTGCTAAAGCGGGAGCGTCGTTAATGCCATCG
CCAACAACAGCAACCTTGTTATTACCTTCTTTATCTTGAATTTTTTTCACGAGATCACAT
TTGCCTGTGGGTGACACATCGCTGTAAACATTTTCGAAGCTTATACCTACTTCTCTAGCG
ACTCTTTTTGCTGCTGAGTTATTATCGCCAGTAATCATATACGTTTCATATCCATTTCTT
TGTAGATACTGAACTGTTGCGTAAGAATCATGTTTAACTTCATCATTAATCTCGAACAAG
CCAAACACATGCCCGTTTACTGATACGTATGATACAGTGTTTCCTTGGTCGACATTACTG
TTAATAAATCCGGATTTTTTTAATGCATCCTCCAAAATCAGCGCCTCGTTACCAATACAA
ATATCATAAGTATTTCCATTAACTTGACACTTTGAGACTATTCCCTTTCCAAGCACGTAT
TCGCTTTCTAAAACAACGGCATTTAAAGCCTTATTACAGTTCAAACCATCACAATAACGT
ATAATTGCTTTCGAAACTGGATGGTCACTAATGGATTCCGTTGCTTTTATACAGGCGAGA
ACTTCGTCTTCATCCACGTTTCCAACCCAATTTGAATCTTTAAGGAATTTTTTCACAACC
ATAAAACCTGTAGTTAAGGTACCTGTTTTATCAAAAACAAAAGTAGTAATACTATTGAAT
TTTTCCAATACTTCTCCGCCCTTTATTAAGACACCATTCTGAGCTCCAACCCCTGTACCC
ACCATTATAGCAGTCGGCGTGGCAAGTCCCAATGCACATGGGCATGCGACAATGACAACA
GAAGTAGCAGTTTGTAAGCAAATAAAAAAATTATCAGCCTTAGTATTTGCGGTGAAAGCG
ACGGGAGGATTAGCCGAGATGTTTAAAATAAAACACCAAATAAAGAAAGTCAATACTGCC
AAAATTAGGATCCCCGGAACAAAAATAGAGGCTAAATAATCTGCATACCCCTGAATGGGA
GTTTTACTCAATTGTGCTTCTTTCATTACCTTGATAATATTTGCTAATTTAGTTTCCTCC
CCAACGGTAGTAGTTCTGAAGTAGAAATGTCCAGGTCCATTAACAGAACCAGCAATAACC
GGAAAACCAGTTTTCTTGGGCACCAAAATGGATTCGCCTGTCATTAACGACTCGTCAATT
TCAGATTCACCTCTTGTTATGATGCCATCAGCCGGAATTTTCATCCCTGGTTTAATCTCC
ACTATATCGTTCACTTGCAATAATTCTATGGGAATTTCCTTGGTTTCATTCCGCTCCACG
TCTGATATAATTGAACACACCGATGGAGTGAGCTGAATTAATTTAGAAAGTGCGGTTGAT
GTTTGTGATTTAGCTAAAGTTTCCAAATATTTCCCGATGGAAATATATGAAATGATCATG
ATTGATGTGTCGAAAACGATCCTTGGGAGTTTGCCAGTACTTGAGGGATGGAACATATTG
TGAACTAAAGAAAACACAGAAAATGTGTATGCACAAGTAGTGGAAACACAAACTAGTGTA
TCCATGGTTCCTGAACCGTGCTTGAAAGATGCCCATGCTGCCTTGTAAAAGTAAAAACCA
ACGCTGAACTGAATATAGCTTGCCAATATTACACCCAAAATATCTCTGTAGAACAGACCT
CTAACAAAGGAGGTTTCTTTGTAAGGGAATATGCGGTCCTGAACAATTGTTGGCGACATC
ATAGGGACAATCATATACAATAGCATACATATTATAGCCAAAAGGGTGGATTTTATGCTG
TTTTTTTTCCAGAATCTTATCTCGTCCTCTTTAGAGAGAAGCCTTAACTGGGTAGTATTA
TCTAAATTGGAAAATACAGTGAATTTATATCCGGTCCTCTCAAGGTGCCTCAATAAATCT
CTAATGCCGAGTTCGTTACAACAGTATTTTATGGTGAGTGTGTGCATATCATCAGAAATT
TCTATCGATTTTACACCTAGGTCTAACAAAAATTGAAACCTTTCGCTTACTGAAGAAAGT
ATGAGTGGGGATTCGTCCTCGAAAGCCTTAGTTACTTTCAAGATCACCGTTTTTTCTGTC
ATGTCTGCATTCCCGTTGCCATCCATAATAATATTTGAGTCAAATCCACAGTCTTCAATT
ATTTCTCTGACGGTTTCTAGCGTTGTCTTGGACGGTTCATAAATAACATGGCACTCTTCC
GTTACCAAGGAAACGACTACCGATTCAACACCCTCAATGCCTTCCACTTGTTTGGTGACT
GTAGAAACACAAGACCCACAGGTCATACCTTGTACACTCAGTAGTCCTTCCTTCGTACTT
ATGGCTGTAATTTCAGAATCTCTTAGTATCTCACAGTCAAATCCATAATCCTCTTTAATT
TCCTTGATAGAATCGGCGGTAACCTCGTTATCGTATGTCACCTGGCACTCATTAGTCACT
AAACTAATATCACATTTTGTTACACCCTTTAAAGCTCGTAACTGCGTATTGATTGTGTTA
GTACAGGCGCTGCATGTCATTCCATGTACAGCAAGTATCACTTCTCTCATTTCGTTTTAA
GTATTAAATACCTCAACTCCTTGGCCGCAAAATTTACGAAATATCTCAAATACCTTTGAA
AAGTAGCTTAGTACCAGGCAGAATTAAAGTCTAATCCATATGTCTCAAATTTGAGAAGAA
ATCCATTAGTTACCGTGACTTCCCTAAATATATACAAGTGTGTGCAAAAGGTCTCGGAAT
CACCGGTGCAAACCCTTCGGCAGCTAATTGCACTCATCGCCGCACTGCACCCGTTCTTTT
CCACTGCCCGCGAAAATCGCTACTACAAATAACTGCACCCAGGACAATACTTACACAGAT
CGACCTCTTTTCGAGCCAGACGGTGGCAACACAACATTCTAACGGTGCTGGCCCTCTGCA
AGAGACTGTACCAACATCTGCGTATTTTTCAAGATACTAACGTTTATTGATGAGATCTAC
CGAGTGAGGAATCTTGCATATTCTGAAATAACAAAGATACGTACAAGTTAAACTGTATTA
TTATTTACATTGCGTTTGCAGCAGCCTAAAGCCAGGGACAGTCAGAAGCCCATTATTTTA
TGAATGTCGGCCAGGTTTTTTGCTGCTTTTTCTCTCGCTTTGCGCATGCCAGATTCAACG
ACACTATGCAAATAGGTTGGTTCGTTGATATATTTCTCAAATTCTGTTCTTGGGCCTTTC
AATTCCTCGATTATCACTTCTGAAACATAATCTTTGAAATCCCTATAGTTATTGAAACGA
GATACATCTTCTACGACATCTTCAATCGATTTTCTTTGAATGCCACTGACAATGTTAATT
AAATTCGATACGCCTGGTCTTTCTACAGGGTCGTAGTAGAACCTATCAGAAATGGAATCT
GTTAAAGCTTTTCTAATCTTTTTCTGAATTGCCTTAGGCTCATCATTCAAAAAAATTACA
GAGTCGTGATTCGGATCACTCTTGGACATTTTCTTTTCAGGCGTGCTTAAGCTCAAAACT
TTTTTCGTTTGTGCCAACATAGTTACAGGTTTAGGAAAAAAATTTTTCTTGTACATTTTG
TTAAACTTTTCAGCAAGGTGTCTTGTTAGTTCCAAATGCTGCGATTGATCATCGCCAACA
GGAACGTGTGTAGATTTATAAAGTAGAATATCCGCTGCCTGTAAAACAGGATACGAAAAT
AAGCCCAGTCTAACTTTTCCCACGTCAGAATCGTTAACCAGATATTCCCCATTAGTGGAT
TGTTTGATATTCGATTTTGATTTCCATTGCGTCATGCGGTTAAGTAATCCCATCGAGGCA
AGAGTAGAAAGCAACCAGTGTAATTCACTGTGTTGAGGGATGGCGGATTGGTAGATCACC
GAAGCCTTTTCTGGATCTACACCGACAGCCAGTATACTTGCTACTGCCTCATGGCGAAAT
TTTCTAAACATTTCTCCATCTGGCTTTGGAACAGTGATAGCGTGTAAATCAGCAACTCCA
AATATCAATTCCTGGCCAGGTTGTTTTAATTCACATAAGTCTGTCCAAACACGTGTAGCA
CCTAGATAATTACCAAGGTGGAAACACCCAGTTGGCTGAATCATACTAAATACCGTAGCA
TTACTATGAAGCGCTTCGGAATTCAGCTTAAAATCGGCACGTTGCACTGTGCTTATCCAC
CTTTTACTGATTAACTTCAGAACCGCCTGCTTATTCGACATCTTACCTTGTAAAAGATAG
TGTAAATATTTATCAAAACCTGATTCACTCCTTAGCAACGTAAAACCTTTGAGATGGTGC
AGGTAGCCTGTAATAAATCATAATATCCTTTTCTACTTTCTCGAAGCCGATTTTATCACG
TGAAAAACAAAAAACACCTTTGCACTTCTATCTTGTTTTGTATTGCCTTTATAGGGAGAA
AAAGATCCTCAAGAAAAGGTCATACTAATTGTAGAAACGTTTGAATTTAAGGAATCTGAC
TCTGATGTGCATAGCAGTGTTACTACTATTTATTTTCTTGAAAAATACCATCTTGATTGC
CTTCAAATAGGTCATCTAAAACTTTCTGCTCTCAGCGGGCCGTGTTTTGAAAAATCTCAC
ATCGAATATTGTATCGTCTTTGCCTCATTAATTGCGAATAAATACTAGATTTGTAGATAT
CACAAATCAAAATCGGGCTATACCACGACATTTTAATAGTTCAATTGGTTTACTTATTTG
GTAATGGCGTCTATCAATCTGATTAAGTCTTTGAAACTTTACAAGGAAAAGATATGGTCT
TTTGACTTTTCTCAAGGTATATTAGCAACAGGTTCAACTGATCGAAAAATTAAGCTAGTT
AGCGTGAAAGATGACGATTTTACGTTAATTGATGTGCTAGATGAGACTGCTCATAAAAAG
GCGATTCGATCTGTGGCGTGGAGACCTCACACTTCGCTGTTAGCGGCTGGCTCTTTTGAT
TCTACCGTATCTATCTGGGCTAAGGAAGAATCTGCTGACAGAACTTTCGAGATGGACCTG
CTAGCTATTATCGAAGGACACGAAAATGAAGTAAAAGGTGTAGCGTGGTCGAATGATGGA
TATTACCTAGCAACCTGTTCCAGAGATAAAAGCGTGTGGATATGGGAAACAGATGAAAGT
GGCGAGGAATATGAGTGTATTAGTGTTTTGCAAGAACATTCACAAGACGTTAAACATGTT
ATATGGCATCCATCTGAAGCATTACTGGCTTCAAGTTCTTATGATGACACCGTCAGGATA
TGGAAAGACTATGACGATGACTGGGAATGTGTTGCTGTCTTAAATGGCCATGAAGGAACT
GTTTGGTCTTCTGATTTTGACAAGACTGAGGGCGTGTTTAGACTGTGCAGTGGAAGCGAC
GATTCCACCGTACGGGTATGGAAATACATGGGTGACGACGAGGATGATCAACAAGAATGG
GTTTGTGAAGCTATTCTCCCGGATGTACACAAAAGACAGGTATACAATGTTGCATGGGGC
TTTAATGGCCTCATTGCTAGTGTAGGAGCGGATGGAGTACTAGCGGTCTATGAAGAAGTA
GACGGAGAATGGAAAGTTTTTGCTAAACGTGCATTATGTCATGGAGTTTATGAAATCAAC
GTTGTGAAGTGGTTGGAGTTAAATGGTAAAACTATACTTGCAACAGGCGGTGACGACGGG
ATCGTAAATTTCTGGTCTCTAGAAAAAGCAGCGTAGATGTAGAAGCAAGAGTACAATTCA
GGAACTCATATTAACACAATGATCGATCTGAATTCTAAAAATAAACTTAATGACGATTTT
TCTACCTAGTTACATAAACCTTTGTATCACTATAACGCAATTCTGTCATGTGTGACGGAG
TGACCTCGTTATACATATCCCTGCATTAAAAGCATGCGGTAAAAACTGAAATTTAAAAAT
GAAAAAAAAAAAAAATTAGATATTCGGAAGACTTGTAATTAAGCATTATCTCGAATAAAG
AAAGGTTACACTGAAAGTTTCATACTCGCGGTCACTCTTAATAATAGCTATATTTTCTGA
TTTTCTCTCAAGATTTTGAAAAGGGCATCTGAACGACTGCCCACTCAGCCATATTCAACA
AATCGTCTAGCGCATACCTAGCTGAAAAAGATCCATAAAGTGCATTTTGATACAGTCTCT
TTCGTCGAAAAAATAGTGGCTATACTTCTTTTCAAGAATTAGGATGTGCGAATCAGTGAA
AGAAAACGTTACTCCGACACGTAACTTCCGTCGTACTCAAGGGCCCCAAAATAATACAAA
ACCTCACAACGACAGGAAGAATTTCAGAAGAAAGCAAAAGAAAAATAACCTTTCTGCTGA
ACCCAACCTCACCACTTCAAGCGCAGATGATACTGATGAAGAGAATGAATTATGTGTAAT
TTGTGCGCGCAAGTTAACATACGTATCTCTAACACCATGCCATCATAAGACATGCCATAT
CTGTGGTTTCAGACAACGAGCTTTGTACAACAAGAAAAGCTGTTTGATTTGCAGAACGGA
GAATGAAGAAGTCACGTTTACCGATCGCATAGATGGTGATATTTCAGATAAATATAACTT
TTGCGAAAAAAATGAAAAATATGGAATAAATTTCACTAGCGAAGAGGTTGCTACCGAAAC
ACTAAATCTTTTAAAATTTTTTTGTCCCCTATCGAAGGATGAACAAGTTTGTGACTTTGG
TAGTTTCAAGAAATATAATGAACACTTGAAATCTGAACATAACAGAATGATCTGTTTAAT
ATGTGCAACCCATAAGCATGCATTCCCTTGTGAGCTTGAAATATTCACCCAAAATCAATT
ACGCAACCATCAAACTAAGGGTAATTCAGAAGGATTCAAAGGCCACCCTATGTGTGCCTT
CTGTTCCGGAAAACGATTTTATTCAGACGACGAATTGTACATTCACATGAGAAATCAGCA
TGAAAAGTGCCATATTTGTGATAAGATGAACCTCGCTTCTCCTCAATACTTTAAGGATTA
TAATCAGCTTTTTGACCACTTTAAACGTTCGCATTACGTTTGCACCGTCCAAACTTGCTT
AGATAACAAGTTTGTCGTATTTAAAGACGAGTTGGAGTTACAAGCCCACATTTTGCAGGA
GCATGGTAATATCCTGAAGGGAAAGCCAAAGTTTTTCCAGTCAGAACTTTCTACTTTTAT
CTCGGCTCCATCTAGAGTGATCAGGGAAAGAGATGATTACGACCTTCCATCTATATCTTC
CCTACCGGGTTCATCATCCGGCTCTAGAACTGATGTGAGATCTGCTAGTTCTCCCGAGGA
AAGTAGACTAAGATTGGCAGAAAGAGCAAAATACTATCTGGAAAATTCCAAAGAAGACTT
CAATAAGTTTTCTTCTTATAACGAAGATTATTCTAAAGGTCGCTTAAGTGCTGAAAAATT
ATTGGAATCATATAAATTGTTATTCACAAAACCAAATGCGGATGTATATTTATTGATTCA
TAACTTAGCTGAAACCTTTCCCAAAAACTCCTCCAAATACAATAATCTGAACGCCATATA
TGAACAAAGAGAGCAAACCCTTGCACGACAAACTTCACTACCTTCTTTATCTAGTGATTC
TTCCCTTTCAATGTCAATAGGCAGGGGCCATTGGGGTGGAACAAACGATGGGGGCAGCGC
TGGTGCAGCATTAGGCGTTAGGAATATCAAAAATCTTCCAACCCTGAAAAGTCCTTCAGC
GTCGTATGATCCCTTTGCAACCACCGTAAAAAAAAACACTTTGAGACCCGTGCAAAACAT
TAAAAGAACTACACCTCAATCAGTTAGTTATCGAACTTCCACTAATACAGTCGCCTTCTC
TCCAACTTATTTGGAAAGTAAAAAGGGTTCCTCTTCTACTTCTCTAAATAATAGCAAAGA
TAAATTGAAAAGTCTCAACCTACCTCAACTACCTCCACCAAAGCCAAAGGTGCAAATTCC
AGGTCTGAACAGACCCCAAATTGCTGATCCTAAGCAGTGGGGTAAAAAGTCAAGCACACA
AGATACTAACGTGCACGATAATTTGAGGGAATTGAACACAACTAGTGGAGGAAATAAAAA
GAAAGGCAAACAAAAGCAGCTGTTATTCCACATTGGTGTATAGTTGGAAATATATTTCTA
ACCTGTAACTGACAATAGCATTAGAGAAATGAAAGTCTTAAATAAAATTCCGATAAAGAA
AAACTTATTTAATTAATTAATATAATTACAAGACTAAAAAGCATTATTTCCCCTTCGCGT
TTTACTTCTCCTGCTCAGACGTCTGCGTTATTTCTGGAAAAGGCCTGTGGACAATGCTAA
AAGAGTAGTCAAATTATTGATTAGTTCCTCTATTGCCGCAGGACCAGAATTTCCTGTGGT
TGACAGTGTTGTCTGCACAAGGGGCATTCTGGCCTCTCTTTACACCAGCTCATAAGACAA
CTCCAACAAAATAGATGTCCACATGGCGCGCAGCTAGGATCACTCATGTTCATGAGACAT
AGAATGCATTTTCTCGAGGCTTCTGGAATAAATGGCAATTGGTTTTTATCTGACAAATTT
ATATGAGTCAGCTGCGATTCCTTCGGTATGCCTTCTATAGAATCATGTTCTGAACGCTCC
TGTAGACCAACAGACGACCTAGTAATTGAATCATTGGTCCTTTTTCTCCCATAAATCCAG
GACCCGAGCGTAGAGGTTAGGACAGGGTACCATTTCATAACGTTTTGAGCTAATAGGATA
TAACCTAATACTTTGTACTTTTGTGAGCCCTCTTCTCTAAAATTGGCCTCATTTCTTGAC
AATATATGTTTAAAAACATATCTCATACCAAAAATCCTTTTGAAAATACTGTAAAAAGCT
CCTTTGAAATAAAAGAGGGTCATGTGTACGTCTAAAATGAAATCTAAAAGGCCCTTACAA
AACGCGGCAACACTTTCAGTATCTTCAATTTTACTCTCCTTGTTGTTCTTCATTATTTTC
TTGTATAGTTTGGTGATGAAATATGGACATAAAGGATAAGCGAAAGCGAATACAATCATT
TTGAGCCGTCCTGCAAGTCTGGTACCCTTCCTATTAGTGTATGTCAAGTCAACATATTCC
TCACCTAACGTTCTACCACGTCTTCCTGTAGTAAAGAGCAAATACAGGAGCTTGGCAAAT
ATGGACAGTTCCTTAGGGTAAGAGTTAACAAACAATTGACTCTTTATCAATTTGCACAAT
TCAGTCACTTTCATAATCAAAAGGCCCTGGATTTGTTCATCTTTTTGATGCGCTTGTACT
ATACTTGGAGCATCGGCAAATGGAAATCTTAGCTGCGATAGTTGCATAAGTGCTTCCTTT
TGCAACTTATTATCATTCTTCATTTTGGTCCTCTATTGTATGACCCCCCACCGATGTAGT
AATGTCTGTTTCTTTCTTCGATGTGTAGTGTGCTTTATTATCACTACCTTATTTTTCTAA
TGTAAACGGCTAATACCTACTTCGCCCTCTCAGATTATCACCGTGGGTAAAAATGGTGAT
AAAACCGGCTGATTACTTGCAAGAAGATGCGCATATGGACAGCTCATGCAGCTGTTGAGA
CGTTATCATTGCTAGTGCAATGGCTCCTATAATATTATCAATTCACGTTTTGCTGCTTAT
TCCTCCGAACGACTTTTAGCATTGGGTTACTCTGATCACAAACATCCGTACCCTACACTC
CGGGTGATAAAGCCAGCCCATTGTTTCGTACTTTCTTATTACGCCCTCATATTGAACGAT
CTATAAAACGAAGTAATGTACAGACACAAGTGCAAGCGAGGAATATATACGGTCGATTAG
TAGATTACAAACCACGAAGTAGAATATATCATTTCCGTTTCGTCTAGATAAAAAAAAACT
TCTTTGTTCAGAGTAGCTAATTGATGGTGAACGAATTAGAGAATGTGCCACGGGCGTCGA
CCTTGACGAATGAAGAGCAAACGGTTGATCCTAGCAATAACGACTCACAGGAAGATATTA
GTCTGGGTGATTCTAACGAAATTACTTCGTTGGCATCATTAAAGGCTATCCGATCAGGAA
ATGAAGAGGAAAGCGGGAACGAGCAGGTGAATCATAATGATGAGGCCGAAGAAGATCCTC
TGTTAACTCGCTACCATACCGCTTGCCAAAGAGGTGATCTAGCGACTGTCAAAGAAATGA
TACATGGAAAGTTGCTCGAAGTTAATAACGACGGTGACTCTAAGGAACATATCACTGGTT
TGCATTGGGCAAGTATTAATAACAGACTTTCTGTAGTGGATTTTCTAGTTTCACAAGGCG
CTGATGTCAATGCAAGGGCTGGTGCTTTGCATGCCACACCATTACATTGGGCTGCAAGGT
ATGGGTACGTGTACATTGTCGATTTTTTGCTTAAGCATGGAGCTGATCCCACCATGACCG
ATGACCAAGGTTTCAATCTACTACACTTATCTGTGAACAGCTCAAATATAATGCTAGTTC
TATACGTTTTATTCAACGTTGTCAGCAAAGGTCTTTTAGATATAGATTGCCGAGACCCAA
AGGGCAGAACTTCACTACTATGGGCTGCTTACCAGGGAGATTCCCTAACTGTAGCAGAAT
TGTTGAAATTTGGTGCCAGCATAAAGATCGCAGATACAGAAGGATTCACCCCACTGCACT
GGGGCACTGTAAAAGGGCAACCACATGTACTAAAATACTTGATTCAAGATGGTGCAGATT
TTTTCCAAAAAACGGATACCGGAAAAGATTGCTTTGCTATTGCTCAAGAAATGAACACTG
TGTACTCACTTAGAGAGGCTCTAACACATTCTGGATTCGACTACCATGGTTATCCCATTA
AAAAATGGTTCAAAAAAAGTCAACATGCTAAGCTCGTTACATTCATAACGCCATTTCTAT
TTCTAGGAATCGCATTTGCTCTTTTCTCTCATATTAACCCTTTGTTTGCAATCATTGTCC
TTTTTTTATTGGCCATTGCCACTAACAAAGGCTTGAACAAATTCGTTCTGCCGTCATATG
GACGAATGGGTGTCCACAACGTTACCTTGTTAAGGTCACCTTTGTTATCCGGTGTTTTTT
TTGGCACTTTACTTTGGGTGACTATCGTTTGGTTTTTCAAAGTTATGCCTCGAACATTTT
CTGATGAACAATATACTAACATCCTAATGCTGGTAATACTTGTTTCTGTATTTTACCTTT
TTGGGCAGCTTGTTATTATGGACCCAGGATGTTTGCCAGAAGAAACTGATCATGAGAACG
TGCGACAAACAATCTCGAACTTGCTCGAAATCGGTAAATTTGATACGAAGAACTTTTGTA
TCGAAACTTGGATTAGAAAACCTCTAAGAAGCAAATTTTCGCCCTTAAACAATGCTGTGG
TTGCAAGATTTGATCATTACTGCCCTTGGATCTTTAATGATGTCGGACTCAAAAATCACA
AAGCATTTATATTTTTTATTACATTAATGGAAAGTGGTATTTTCACATTTCTTGCACTTT
GCCTGGAATATTTTGATGAACTTGAAGATGCACACGAAGATACATCCCAGAAAAATGGCA
AATGTTTCATCCTAGGCGCTTCAGATCTCTGTTCGGGGTTAATATATGATAGATTTGTCT
TTCTGATATTATTATGGGCTTTACTCCAATCTATTTGGGTTGCAAGTTTGATCTTCGTCC
AAGCTTTTCAAATATGTAAAGGAATGACCAATACAGAATTCAATGTTTTGATGAAAGAGA
GTAAGTCCATTGGCCCCGATGGGTTATCTTTCAATGAAAACTTCAATACTACTCCAGAAG
GATTTGCGCCGTCGATTGATCCGGGTGAGGAGAGTAATGATACTGTACTAGCACCAGTCC
CAGGCTCAACGATAAGGAAACCACGCACTTGTTTTGGCGTTTGTTACGCGGTGACTGGTA
TGGATCAGTGGTTAGCGGTTATAAAAGAAACCATTGGCATCAAGGATAGCACCGGACATA
ATGTGTATTCGATTACATCAAGAATACCAACAAATTACGGTTGGAAAAGAAATGTTAAAG
ACTTTTGGCTTACAAGCGATATAAATGCGCCTTTGTGGAGGCGAATTTTGTATCCTCCTT
CGGGCTCTAAAGCTTTGCTCAACGGGATAGAAGTTGACTATTTTAAGCTTTACAAATTGC
CAAATAAGGATGTTGAACAAGGAAATGATATGGTATGAAAATTTTGTTGTTTTCATTAGG
AGAAACTGTATATTTTAGCCTTTTATCAAACAACTGTGAGTATAGAAAAGTTTATGCCTC
AAGCTGCAGTGCTTCTTATAAGTGATTGGCTGAATCAAGGACTATTAGGAAAGCTCATGA
GGTGGTTAATAAATGTTTAGCTGAAAAAATGAAGATAGCCACATTTGTAACATTCATTTC
AAAGCACATATATATATATAATATACATATGTTTGTTTTGGGAAATTACTGGAAGCTGCC
CTAGTTTTGTTTTGATTTCACTTTCCTTTGTTTACATATTACCATTTTGACGCGTTCCGT
GACACGTTAAAGGATAATAGTTGCACAAAAGGGATATGTGGCACTCTATGTCGTTCGTGG
TAATTCGAGAAAAGTAATCATATTTATGGGCTTAATATGGAAAGAGATATTGTTTAGCGA
GTAAGAGAAAACGATCATCAAAATTAACAACAAGAACATTATTATTCGATAGGAATGGGA
ATACCTGGCTTACTGCCTCAATTAAAGAGAATTCAAAAACAGGTGTCCCTGAAAAAATAC
ATGTATCAAACATTAGCCATTGATGGTTATGCGTGGCTACACAGGGCTTCTTGTGCGTGT
GCTTTTGAACTTGTGATGAATAAGCCAACAAACAAATACTTGCAATTTTTCATTAAAAGG
CTGCAACTCCTAAAACGCCTTAAGATCAAGCCATATATAGTTTTTGATGGTGATTCCCTT
TTTGTGAAAAATCATACAGAAACTAGAAGAAGAAAGAAAAGGTTAGAAAACGAAATGATT
GCAAAGAAATTGTGGTCAGCCGGCAACAGATATAATGCAATGGAATATTTTCAAAAAAGT
GTTGACATCACACCAGAAATGGCGAAATGTATTATTGATTATTGCAAACTACATTCAATT
CCCTACATTGTTGCACCATTTGAAGCAGATCCGCAAATGGTTTACTTGGAAAAAATGGGC
CTTATACAGGGTATCATATCAGAAGATTCTGATTTGTTGGTCTTTGGTTGTAAAACACTC
ATAACAAAGTTAAATGATCAGGGAAAAGCTTTAGAAATCTCAAAAGACGATTTTTCAGCT
TTACCTGAAAATTTCCCTCTAGGAGAATTAAGTGAACAACAATTTCGTAATCTAGTTTGT
TTAGCAGGGTGTGATTACACTAGCGGAATTTGGAAAGTGGGTGTAGTCACTGCTATGAAG
ATTGTGAAACGGTATTCTGAAATGAAAGACATCCTTATACAAATAGAACGGACAGAAAAA
CTTTGTTTCAGTAAGGCGTTCAAGCAGCAGGTTGAGTTCGCCAATTATGCGTTTCAATAC
CAAAGAGTGTTTTGTCCTCTATCAAATCAGATTACAACTTTAAATAATATTCCTAAAGCA
GTCACAAATTCCCACGCTGAAATTATTAAAATTATGAAATGTATTGGTTCCGTTGTTGAA
AGGGGATCAGGGGTACGAAAAGATGTCATTAATACTAAAAATATTGATCACAAAGTTCAT
GAAATGATAGCAAAAGGGGAGTTGCACCCTGTAGATATGGCTTCTAAACTTATTAATAGA
GAAAGAAAATTAAAAGCAAGAAAGCTGTTTAAAGTAAGTCTACTTGGGGGTGAATCCAAC
TCATTCAATAAGAAAGTGGAGCAACCGCTAGTGGATACGCAGGACGTGTTATCGGAGAGG
GAGAATTCTCTTGATAACAAAAACGCATCCTCTATTTATATGACCTCACCAGCAGCGATC
TCAGGCACCGTACCATCAATTTTCTAAGTGGTGTATATATATGTTCGAAGGTATTGTTGT
AATATTTTCATAGTTGTATTCTTATTCCACCGGCCCCAGCTAAGCATTAATATAAGGATT
CGTAAAACAAAATTATCGTTCACACACTAGAGAAAATATAACTATAAAACAAATTGATAC
CAATGTATATATTATGTTGTAAACTCCATAAAGATAGGCCGATCCTACTCGCCATTATTA
ATAAATTATAACCAAAAAAAATAAAGAACGCAATTTGTATGGGGTCAAGGAAGTCAAAAC
CATAAGCAACACATAACTAAGGACCCACCAGGGTGAAATCAACCATCAAAATAACACCAT
TGCTTCCATTTTCAATGCTCTCGACGGCATGAAATTTCTCGTCTCTGGAGGAAGCTACAT
AATATACTTCTCCTTCTTTTTTGAGTAAAATATCACCACCAGTTTCCGAATCGCTTTTCT
TGCTTTCTGTGAAGTCAATACTCTGCAGGAGCGTACATCCTGGACTCACCTTCTTGTAGG
AATTTTTATCATCGTTGTACACTACAATATGAGATCTCACAAATTTGGAGATATTCTCTT
GTATTGCCGTATCAAGTTCCTTCTCGGTGGCACCATCACTTTCAAGCTTATCAATATTAT
TCGGAAATTGCCACGGTTTTAAAGTAAGCTGAGAGACGGCCCTGTTCGTTGGTGCAATAA
TAATCAAATCTTCGTTGGGGTCACTTACTTTGTTATATGTTTCAACATCGTTTCGCACAT
AGCTTGCAAATATTTGGACCTCGTTCACTAATGACAACTTTGATTCTAAGGATAAAGGAG
ACAATTCAGCCAAAAACTCTTGCTGCTTTCTTTGCTGTGTCCCTAAAATATCATCTAAAT
TCACTGCGGGTCTTGAAAAGTCACGCATTCCCTTATATCCTAATGGATAAGAATTTACTT
GAGAATTATGTAGCCGGGGCGGTATTTCCTCTGGTGCTAACCGCTTGTGCAGCTTGCCAT
TTGAATCTTTGAAAGTAATTAAGTTGACGACGTTCTTACCTCTTACGAAACTAGGCTCCA
TTGCCCATATCAAAGAAAAATAAAGCAGCACACTAACAGGTAGATTGAATATCATGGTCG
TTTTGTAAGTTTTTATATTATAAGGAGAAGTTATGAAGCAAAAGGGGATGACCGTCTAGT
TGTTCTTGAAGATTAGTTAGCCCGATGACCGGATTTATTAACGTAAAAGCTGCTTAATCA
TTATTAACGGTGATATAAAATATTGACTGAACGAATGCTGAGTAGGCGAGGCAGGCACCT
AGTCTCTAAACCCTTCATATTGATCGCTAATAGTTGCTAAAAAAGTGCGCAAGCCCGGAA
TCGAACCGGGGGCCCAACGATGGCAACGTTGGATTTTACCACTAAACCACTTGCGCTCAC
AATTGTTGGATTTGTTTTATCATCGACATACCATACCTCAATATGACAATAAATCATGTT
AAATGTTCATAAATCACATATGAAACTGAAGATTTGGTGAATTTTGATGTAATTGTTGGG
ATTCCATTGTGATTAAGGCTATAATATTAGGTATGTAGATATACTAGAAGTTCTCCTCGA
GGATTTAGGAATCCATAAAAGGGAATCTGCAATTCTAnTAATTGTTGGGATTCCATTTTT
TATAAGGCGATAATATTAGGTATGTAGAATATACTAGAAGTTCTCCTCGAGGATTTAGGA
ATCCATAAAAGGGAATCTGCAATTCTACACAATTCTATAAATATTATTATCATCATTTTA
TATGTTAATATTCATTGATCCTATTACATTATCAATCCTTGCGTTTCAGCTTCCACTAAT
TTAGATGACTATTTCTCATCATTTGCGTCATCTTCTAACACCGTATATGATAATATACTA
GTAACGTAAATACTAGTTAGTAGATGATAGTTGATTTTTATTCCAACACGTTTCCATCAT
GAGAATGTGCTTCAGTATTACATTTTTTGCCTTCAAACGCCTTGATTGTTCTATTTTTGC
TAATAATAAGTCTTTTTCATCGGACTAAAAGTCCATCAGTTGTAAGCGGATTTAGCTCAG
TTGGGAGAGCGCCAGACTGAAGAAAAACTTTGGTCAAGTCATCTGGAGGTCCTGTGTTCG
ATCCACAGAATTCGCATTCTTTTTTGCTAGCATTCTTTTTTTTTCATTTCTAGGCCTGTT
TCTCCGCGCTGATTGGTCGCCCGGGTGATGCAGTTGCGGCCGGCCCTGGCCAATCAGATC
CCTTTAAAAATGGGCCCGGTGCGCTTCTACCCCTTCACGCCTTTTACGCCTTTTTCGAAT
CTTGTATTTATTGTAATTATTATACATTGGTCATATCAAATTCACATCAGACTTCAATTT
TTCAATTCACTTTCTGAATAAGAGCCCTTCCCTTCATACAAGTAGAGATATTATACTGTC
ATAGCTCTTTCAATTGGTCTTATTAGATTGTCTCCATCTTTCCCATTGACGTTGTTGCTC
CCTCTCTTTTTTCGTTTTTAACTGATTTCTCATATATTCCCAAACAGGCATATATACTCG
ACGTCAAGAAAGAAAAGAAAAGAAAACCCTCATAAAAAATATAATCGAGAAGTTTTTTTC
CTCATCGCGAACCATTAGTATAACAGATTGATCGTTCAGCTCTCATAACTATCGCAAGAA
CAGTAACAAAATAAATAAAAAAAAACACGCACATATAATAATGTTGGCTCGTACTGCTGC
TATTCGTTCTCTATCGAGAACTCTAATTAACTCTACCAAGGCCGCAAGACCTGCCGCTGC
TGCTTTGGCTTCCACCAGAAGATTGGCTTCCACCAAGGCACAACCCACAGAAGTTTCCTC
CATCTTAGAGGAAAGAATTAAGGGTGTGTCCGACGAGGCCAATTTGAACGAAACTGGTAG
AGTTCTTGCAGTCGGTGATGGTATTGCTCGTGTTTTTGGTTTGAACAACATTCAGGCTGA
AGAATTGGTCGAGTTCTCCTCTGGTGTTAAAGGTATGGCTTTGAACTTGGAGCCTGGTCA
AGTCGGTATCGTTCTTTTCGGTTCCGATAGACTGGTTAAAGAAGGTGAATTAGTCAAGAG
AACCGGTAATATTGTTGATGTTCCAGTCGGTCCAGGCCTTTTGGGTAGAGTTGTCGACGC
TTTAGGTAACCCTATTGATGGTAAAGGTCCTATTGACGCTGCCGGTCGTTCAAGAGCTCA
AGTCAAAGCACCAGGTATTTTGCCAAGAAGATCTGTCCATGAACCAGTTCAAACCGGTTT
GAAAGCCGTTGACGCTTTGGTCCCTATCGGTAGAGGTCAAAGAGAGTTGATTATTGGTGA
TCGTCAAACAGGTAAGACTGCTGTCGCCTTAGACACCATCTTGAATCAAAAGAGATGGAA
TAACGGTAGTGACGAATCCAAGAAACTTTACTGTGTTTACGTTGCCGTTGGACAAAAAAG
ATCTACCGTTGCTCAATTGGTCCAAACTTTGGAACAACATGACGCCATGAAGTACTCTAT
TATTGTTGCAGCTACTGCATCTGAAGCCGCTCCTCTACAATACTTGGCTCCATTTACTGC
CGCATCCATTGGTGAATGGTTCAGAGATAATGGAAAGCACGCTTTGATCGTCTATGACGA
TTTGTCCAAGCAAGCCGTGGCATACCGTCAATTATCTTTGTTGTTGAGACGTCCTCCTGG
TCGTGAAGCCTACCCTGGTGATGTCTTTTACTTGCATTCAAGATTGCTAGAAAGAGCCGC
TAAGCTTTCTGAAAAGGAAGGTTCTGGTTCTTTAACTGCTTTGCCTGTTATTGAAACCCA
AGGTGGTGATGTCTCCGCTTATATTCCAACCAATGTTATTTCCATTACCGATGGTCAAAT
TTTCTTGGAAGCTGAATTATTCTACAAGGGTATCAGACCTGCCATTAACGTTGGTTTGTC
TGTTTCTCGTGTCGGTTCCGCTGCTCAAGTTAAGGCTTTGAAGCAAGTCGCTGGTTCCTT
GAAATTGTTTTTGGCTCAATACAGAGAAGTCGCTGCTTTTGCTCAATTCGGTTCCGATTT
AGATGCCTCCACCAAGCAAACTTTGGTTAGAGGTGAAAGATTGACTCAATTGTTGAAGCA
AAACCAATATTCTCCTTTGGCTACAGAAGAACAGGTTCCATTGATTTATGCCGGTGTTAA
TGGTCATTTGGATGGTATTGAACTATCAAGAATTGGTGAATTTGAGTCCTCCTTTTTGTC
CTATCTAAAATCCAATCACAATGAGCTTTTGACCGAAATTAGAGAAAAGGGTGAATTGTC
TAAAGAATTGTTGGCATCTCTAAAGAGTGCTACTGAATCATTTGTTGCCACTTTTTAATG
TGAACTAAAAAAATAAAAATGAATATAAGGTACGTCTCAAAAAGAAATGTAAATATAGAA
ATTTTAAAAAAAAAACGAAAAAAAAAATAACTAAATTTAAAGTGCAACCAAACAATAACC
CTGAAAAATCTAAATATCTTAGAATTTTTTTATTTTGATTATTATATATTATTATTATTC
TTATGGTAAATAATGCCCCTACTTTTCTTCTAAGGAAATGAGTTACTACAAAAATAAGGA
AATATCGCCTGCAAGCGGTTTTTATTTTGGAGTTGTTTTTTTTTTTTCCCACAATAGCCT
CTAGTTTATTCCATTCTTAGCACTGACTCTTTTTTCCGCCACTATTTCTTATAAAAGGCC
CGAATTTCTGGCACGGACGTTGTTTTTAATAATAAAATATTGAATGACAGTTAAAAAATC
ACGTAGTCAGTTAATCTGTTTAACTTGAAAATATGTCTGAATCAGTGGCCATTATAGGTG
CAGGATTAGTAGGCTGCCTTGCAGCTTTGGCATTCTCCAAAGAAGGCTACAATGTCACAC
TTTATGATTTTAGACAAGATCCTCGATTGGACACCACCAAAAATAAAAATTTGAAATCCA
TTAATTTGGCTATTTCTGCTCGTGGCATTGATGCTCTGAAATCAATAGATCCGGATGCTT
GTGAACATATTCTGCAAGATATGATTCCCATGAAAGGCAGGATGATTCATGATTTGAAAG
GCAGACAGGAATCACAATTGTATGGCTTGCATGGAGAAGCTATTAATTCTATCAATAGAT
CTGTATTAAATAATAGCCTTTTGGACGAATTAGAAAAATCTACAACAGAACTGAAGTTCG
GTCACAAATTAGTCAAAATCGAATGGACAGATGATAAACAAATCTGTCATTTTGCCATTG
GGGAAGATTTGAAAACCCCACATACTGAAAAGTATGATTTTGTCATAGGTTGTGACGGAG
CATACTCTGCGACGAGATCGCAAATGCAACGTAAAGTTGAGATGGATTTTTCACAAGAAT
ATATGAATTTACGTTACATTGAACTTTACATCCCGCCTACTGAGGAATTCAAGCCAAACT
ATGGCGGAAATTTTGCAATAGCTCCTGACCATTTGCACATTTGGCCTCGTCATAAATTCA
TGTTAATTGCGCTCGCCAACAGTGACGGCTCGTTCACTTCAACCTTTTTCGGTTCTAAAG
ATCAAATATCAGATCTGATAACTTCCAAGTCACGTGTGAGGGAATTCTTAATCGAGAACT
TTCCCGATATTATTAATATTATGGATTTGGACGATGCTGTCAAAAGGTTTATCACTTATC
CAAAGGAAAGTCTTGTCTGTGTAAACTGTAAGCCATACGATGTACCAGGCGGAAAGGCCA
TCCTACTCGGCGACGCTGCCCATGCAATGGTTCCATTTTACGGCCAAGGTATGAATTGCG
GATTTGAAGATGTGAGAATTCTTATGGCGCTATTGAAAAAGCATTCAGGAGATCGTTCAA
GAGCCTTTACTGAGTACACTCAAACAAGACATAAGGACCTAGTTTCTATTACTGAGCTGG
CAAAAAGAAACTATAAAGAAATGTCACATGACGTTACATCCAAGCGGTTTTTATTAAGGA
AAAAGCTAGATGCTCTCTTTAGTATTATAATGAAGGATAAGTGGATACCTTTGTATACAA
TGATATCTTTCAGATCCGATATCTCGTATTCTAGAGCTTTAGAAAGGGCTGGAAAGCAAA
CACGTATCTTGAAATTCTTAGAATCTCTGACACTCGGTATGTTATCTATTGGCGGTTACA
AGCTTTTCAAATTTTTGACAAGAGAACGTTCCTGAAGCCAGTTTATTCTTGCCATCCGTG
TACGCTAGGAGAGGATTATTAAAATAAGTGATATATACATATATATATATATATACATAT
ATATATATATATATATATATAATACACTAATTATTTTATGTGATGTTGATCACGCGAAAC
GGTAAACGGCTCTGTTCGCGCTTTCTTTGTTTACATTTTAGTGAAGTATTGTCAAGATAA
TATCCATATGGTTGAACTTTTTATATTGGCTAGTTAAATACTCTATTTATTGCACCAAAA
AATCATCTTAGTGGACTTTTTGGAGCAAAAAAACCAGCAGGTAGTTATATAAGATGACTA
CACAACTAAGGTATGAAAATAACGATGACGATGAAAGAGTAGAACATAATCTCTTTACCA
ATAGATCCACCATGATGGCAAATTTTGAAGAATGGATCAAAATGGCTACAGATAATAAAA
TCAATTCCCGAAATAGTTGGAATTTCGCATTGATCGACTATTTTTATGACTTGGACGTTT
TGAAAGATGGCGAGAATAACATCAATTTTCAGAAAGCATCTGCAACCTTGGATGGGTGTA
TTAAGATTTACTCTTCGAGAGTTGATTCAGTGACAACGGAAACAGGTAAGTTATTGAGCG
GGTTGGCACAAAGAAAGACGAATGGGGCATCTAACGGAGATGACAGTAACGGGGGAAATG
GTGAAGGGCTTGGAGGTGACAGTGACGAAGCAAATATAGAGATTGATCCCTTAACTGGTA
TGCCTATATCTAATGATCCTGATGTGAATAACACTAGGCGGAGAGTGTACAACAGAGTTT
TAGAAACAACATTGGTGGAGTTCGAAACGATCAAGATGAAAGAGCTAGACCAGGAATTAA
TAATTGATCCATTATTCAAAAAGGCCTTGGTTGATTTCGATGAAGGTGGCGCCAAGGGTT
TATTGTTGAACACATTAAACATAGACAACACTGCAAGAGTCATTTTCGATGCATCAATTA
AGGATACACAAAACGTAGGGCAAGGTAAACTTCAAAGGAAAGAAGAAGAATTAATTGAAA
GAGATAGTTTAGTAGATGACGAAAATGAACCTAGCCAGTCATTGATAAGTACTCGTAATG
ACTCAACCGTAAATGATTCCGTTATTAGTGCACCTTCCATGGAAGATGAGATTTTATCTC
TTGGTATGGATTTTATAAAATTTGATCAAATTGCGGTGTGTGAAATTTCAGGATCGATTG
AGCAACTAAGGAACGTTGTCGAAGATATTAATCAAGCGAAAGACTTTATCGAAAATGTTA
ACAACAGATTTGATAACTTCTTAACTGAAGAAGAATTGCAAGCAGCTGTCCCAGATAATG
CAGAAGATGATAGCGATGGCTTTGATATGGGCATGCAACAGGAGCTGTGCTATCCAGATG
AAAATCATGACAATACATCACATGATGAACAAGATGATGATAATGTCAACAGTACCACAG
GAAGTATATTCGAAAAAGATTTGATGGCATACTTTGACGAAAATCTAAATAGAAACTGGA
GAGGGAGAGAACATTGGAAAGTACGAAATTTTAAGAAAGCAAACTTAGTGAATAAAGAAT
CCGACCTGTTGGAAGAAACGCGAACTACTATAGGAGATACTACTGACAAAAACACAACGG
ACGACAAATCGATGGATACGAAGAAGAAGCATAAACAAAAAAAGGTTCTGGAAATTGATT
TCTTCAAAACGGATGATAGTTTTGAAGACAAAGTCTTTGCCTCAAAAGGAAGGACAAAGA
TTGACATGCCGATTAAGAACAGAAAGAACGACACACATTATTTACTGCCGGATGACTTCC
ATTTTTCCACTGATAGAATAACAAGATTGTTCATTAAACCGGGGCAGAAAATGAGTCTGT
TCAGTCATAGGAAGCATACCAGAGGCGACGTTAGTTCGGGGCTTTTTGAAAAAAGCACAG
TTTCTGCCAACCATTCAAATAACGACATTCCTACTATTGCAGATGAGCACTTTTGGGCGG
ATAATTACGAAAGGAAAGAACAAGAGGAAAAAGAAAAGGAGCAGTCTAAAGAGGTTGGTG
ATGTGGTGGGTGGAGCGCTCGATAATCCGTTTGAAGATGACATGGACGGTGTTGACTTCA
ACCAAGCTTTCGAAGGAACAGATGATAACGAGGAGGCCAGTGTGAAACTTGATTTACAGG
ATGACGAAGATCATAAGTTCCCCATTCGAGAAAATAAAGTTACTTATTCAAGAGTTTCGA
AAAAAGTTGACGTAAGAAGATTAAAGAAAAACGTATGGAGATCGATCAACAATTTGATAC
AAGAACATGACAGTAGGAAAAATAGAGAACAAAGCTCTAATGACAGTGAAACCCACACAG
AAGATGAATCAACAAAGGAGCTCAAGTTTTCTGATATCATTCAAGGTATAAGTAAAATGT
ATTCGGATGATACACTAAAGGACATTTCAACAAGCTTTTGTTTTATATGCCTTCTACACT
TAGCCAATGAGCATGGGTTGCAGATAACTCATACCGAAAACTATAATGACTTGATAGTGA
ATTATGAGGATCTAGCGACAACACAGGCAGCGTCATAGTTGATGATCTTTTTTTTTTTTT
TTTTTTTTTTGCTGCAAAGTTTCTTAAAGCCTTCGGGCTTACGAAATCCTTTATCACCGA
AAGGGGACCGCTTCGAAAAGTGGATATAAAACAAGGTATTTATTTTTTATAGACAATGAC
CAAATGACAGGATAGATCGAGGGTGAGTTCCAATATGTCCAGAACTATTCCATTTCTATT
TAAATTAGTCAACAGGGCAGTAATTTTACCTACGGCAGGTTTTACGTTAGGAGTTGGTGC
GTTTGTAAAGGCGTGGCCCGATGATGCCGGTGTTCTATCATTGAATGATCCGCAAACGCC
AGCGGAGTTGATTAGTGCGACCAAGAGCCGCCAACCTATGGAGCTGCAGAGGGTTGACAT
CCTCGCTCAAATCGAGAAAAGCGAGGTTTACAACAAGTTGGCCCAGGATGAGAAGATGCA
CCATGTCTTATTCAGTGAGAAAATACCAAGCGGGCATAGGGAATATCATGTAGGACAAGG
CCTCTTGTTCGGCAAGGGGAAGCTTGAAATTGATCCTTTGGTGTTCCATGATGTGAATCA
CGGTGAATTAACCGTGATTTATCACTTAGGTGCTGAGTTAGGGAATCGAGACGGTAACGT
CCATAAGGGCTTGTTGTCATTGTTGCTGGATGAAGCATTGTGCTATTGTGGCTTCCCTTT
GTTGCCTAGTAAAAGAGGTGTAACTGCAAGGCTGTCGCTAGAGTTTTTTGAGGACATTCC
TGTAGATACTACGATTATACTAAAAGCAAACGTCAAAGAGATTAAAGGCAGAAAGTGTAT
CATTGAGGGACACTTGGAACAGTTTCCGTTGGAAGTTTCTTCTCGAAATGGAACTAGAAG
TTGGAACTTACCACATATTTGGGGTTTCAACCATAAGCAGGAGATAGCAAAAAAATTTGC
CAAGGCCAACTGTATTCTCGTTGAACCTACTTGGTTCAAATATTTTAAATGGCTTGATAT
GTTTTGAAAAAGCATGCCTGTCTCAAAATAGCCTATTCCGTGTTAATTAATATTCTATAT
TCAAAAAAGTTAAACATATATACTGCATGTACTTACCGCCGAAGCACAAACGTGCCACTT
CCATGAACACTTGCTCTTTACTTATAGTGGGGCTGATATGCGATGGCGTAAAGCTACTCC
AGCCTCCTTCTTTTCATATCCTCATGACTGTCACTATGTGTTGGTGTAGCCATCGAACTT
CCACTAGATTTGTTCTTCCTTTTCTTACTATTGTTACCTGAATTTGAGCCGGATTGGCTT
TTTCCTGTACCGTCTAGATCAAACGCCAAGTCGTCTATATCAAACGGCGCTTGGGCTCCC
CCTTGGTTCTGGTTTGCGAACTCGCTTGGATATGACCTTTCAAACTGCGATAGTACCGAA
GAGCAAAGGTCCCAATCGAAATTTGGAGGCTGAAACAATGCTATGTCTCTATTGCGCAGC
TGTTCGCGCCATTGTTGCTCTGACATGTTTTGACCCTGCTGAGGTGGTTGTATCATCATG
TCTGGGTTATTTTGGAAAAGAATATGTGCTATTTGACCACCTTTACCATTTTCTCTGGTC
GGTATGGTGGAGAATTTACCTGAAAGATCTGCTATCTGGTTCTTGTAAGATTTTCTTAGC
TTCACGGCTTTAGTGCCGTCCAAATTTGTTCTTGCCACTTGCCTGGAGATGTCATCCAAG
CCATACACCGATATCAAGTCCTGTAGAGGATTTGGTTGTTGGTACGTATATGTAGTTTCC
GGATCCACGTAATAGTAGTATGAGGGGACTGTAGTTTCGTCTACTCTAGAAGCCATTATT
ATCGTATTCCTTTTTCGTTCACTTACTATTGCTATTCGCACTCACTACAGACCTATATTT
TATGTTCCACCCTGTTGTCAGATCAGAAAAGGAATGAAGAGGCTCTATTTAAACCAAATA
CACCTCTTCGTTTCTCAATATTGTTGGGCTTTTCTTTTTTTTTTCCTTCCACGTCTATCT
ATTGTCTCTATCAAAATTAGGAAAAAGAAATGAAGAACGATGAGCCAAACGAGGCTGAGA
CAATCATGCATCCGTACATTCTATGTATGTTTGGGTGTATCTTTCCAGATTCGGTTCTTT
TTTTTTTTTCAGTCCAATTGAAAAAAAAAAGGAACAGGAACAACGGGCCGAAATTTGCCG
TCACATTCAGAGCGAAGGGCGACAGGGGAGTTGGTGGGCTAACCACCTGTTGAGCCCAGC
TAGCAGCTGTCGGTAAACCGTCGTTGGGCGGGGCGCGACAATGCAGCCAGGGGAGGCATT
GTATGGTTTCCGTCTGGAGAGTGGGCTTAGCCGGCCTGGCACTCCTTCTCTAAGCAGAGT
GAGAAGGGAATCTTTTTACTGGAGAAGAGTGTTTGAATCCAGCAGAAGGTAATACGCACC
TTTCTCATCTATTTGCAGAATCGTTTTATTAAAATACTTTTAAAGAATTTAGATTTTGAT
AATTAGTTCATTCTCTTTTACAAAGATAATCACCAAACAGGGACAATACACTGAACGATA
AAAGTATGTGACATATAGAATGCTAGAATGAATAGCCTAGACTGCATTGTTATGAGATCA
ACGTTTGATATTTGTGGCGATTGGAACAAACATAGTACATGCCAAAATGAGATGAAATGT
CCAATTTGAACTGATTAACATACACGCGCAAGCTCGTATTTGTTTACTGGTACACCTAGA
GTCAGCCGATCAAAGAGACAGTGGCAGATATATGGGAAAATTTTCTCCGGAAGATTGCAT
GCGAGAGTCTCATAACCAGTCATTTCCCAAGATACAATTCTCGGAGCTGTTATACTAACA
AACTTTTAATTTTTATTTTTTTTTTTTTGATTAGATGGCCTCCTTACCTCACCCAAAGAT
TGTCAAGAAGCACACCAAGAAGTTCAAGCGTCATCACTCTGACCGTTACCACAGAGTTGC
TGAAAACTGGAGAAAGCAAAAGGGTATTGACTCTGTTGTTAGAAGAAGATTCAGAGGTAA
CATCTCTCAACCAAAGATCGGTTACGGTTCTAACAAGAAGACCAAGTTTTTGTCACCATC
TGGTCACAAGACTTTCTTAGTCGCTAACGTTAAGGATTTGGAAACCTTGACCATGCACAC
CAAGACTTACGCCGCTGAAATTGCTCACAACATCTCCGCTAAGAACAGAGTTGTCATTTT
GGCTAGAGCTAAGGCTTTGGGTATCAAGGTCACCAACCCAAAGGGTCGTTTGGCTTTGGA
AGCTTAAATTAAATAAAGATTTACAAAATAATAACCTTCATTTAATTTTAAATTTCAATA
AAAAAATATCAAATCAAACATGACTTTTAAATCTACCATTAGATAATTGTATAAAGTGAT
TTATTGTTTTTTAATTTTGTTTTCATTATCTATCAAAACTAGGGCATTCTTCCTCACTTT
TAGTGATAAACTTTTGTAAACTCAGTAGTATATCCAGCCGACGAGCAATGCGATAACGGC
GATGATAAGCAATGCTCTGGAACTCAGACTTTGCCCGTTACCTGCTGATGGCGCTCTTGC
TGATTCTGCATCGTGGTTTCCAGACGGTTTTCTTTTCGGTAACACGGAGTGAAATACTTT
GATCTTCTTGAAGACTATGTCATCTTTGTACTGCTCTTCCAGATTAGGCCAATCGGACAA
CAGCTCGCCATCCTCCACGTTTTGGTAAGCTGCCGGGATAGGAAGTGTAACGATCAAGAA
TTTGTCTCGTTTTTGGTCCATTTCATCGTCAGCGGTTGACTTGGGTAATCCAAGGAAAAC
AATTTGGACATTTACACTTTCATGAGAACCTATGATGGCCACATTGGGCCTCACACAATA
CTTTGTGGGAGCACTAGTCCTCACTTTAAATATAACTCTCTTTTCACCATCGTTCTCGAG
CTTTATATACTCTGTTGATTGTTTATTAAGGGGAGCTGGAGTATTACATATTAGTAACCT
GTTGCATCGCACCAAAAAAGGTAGCAAAGTTTCCCGCACACTAGCAATTCTCGTCAAACA
TACCCTTGAACACCAGCTTTTCTGGCACTATTCTCATTGTTTACTCGTCTGAACTAGTGC
TTATATTATCTGTCGTCATACCACTGTTTGAGACCCCCATTGGTCTTATATAAGGTAATG
CATCATTCTAAACGGGCGGCAAGCCATATTAAACTATCTATATAACTACAACAGTATTCA
TATACCTAGTGAGGAGGCCATTTGAAAGCGCATTTTACCTCAGTAGTCATCACCTTTCGA
AACGACTTCCTTTTTGTGAGCATGCAACAAGATGGTGTGTTCGAATTGTGCAGTGTAGGA
TCCGGGGATATCGTTCAATGGTGGATAATCCTGTACTAAACCGTGTCTAACCAAGTTATT
CAACGCAAATAAGTATTTCTCTTGGCCAAGTCTGTCTAGGTATCGGCGACAGAACGGTAA
AGTCCCAAAGTTGCGGTCTATCGTTTTTAACAAGTTCTTGGCGCTGTCCAACGTGGGCAT
TACCTGATGGTCTTCAGCAGATCTGGCATAATGAGAAACTTCCCCACCGGCAGTAACATA
ACCTCTACCAGTAGAACCAAAAGTTTCAATGGCAAAGTGCTCACCTTCCTCCATTTTTGT
AGTGTCCCCATTTTTGACGATGGGAACGGATTTACCGCCGTGGATACGATATGGTGCGAT
ACTGTGGCCACATAGATTACGACAAGGTTTAACCTGGTAAGTCTCACCATTGATTTCCAC
TTCGTAGGATTCCATAACTTCTTGGATGGCTTCACCGATGTCGGTTAATCTCACATCGAT
ACCCGCTTCTTTAATACCCGTGTAAGTAGCGTCCTTTACAGCGGCTAACAGGTTATCGTA
TTGTGGATCAAAGGAAACAGTAAAGGCAGAATCAATGATGTTACCGTTTACCTGCACACC
ATAATCTACCTTCATCACGTCTTCGTATTTCAGAACGGTTTTGTCGCCTGCATTGGGTGT
GAAATGTGCAGCACAATGGTTGAGAGAGAGACCCGTTGGAAACCCAATACCTTGAGATTT
GGGATCCTCCATCGCTAATAAATTTTCGGCACCTGTATACTTTCTTGTAGTATTTTCGAT
CATGTCTGCGATATCCATTAACTTCATCCCAGGAACGATTCTGTCCTTGATGGCCCTTCT
CACACGACGATGTATCTCAGCACCCTTTCTGACATCATTCCAATGTTCGGCCCTTTCCAG
ATCCCTTTTCAAATAACGTGATTCTTCATCCGTGGTTCTTTGCAGATTGAAATCTTGATG
ATAGTCCATCCACGCACCTTCTGGGTACTTTCCATCTGGAAACAGTAATTCAATCTTCTT
CACATTGCTTTTCTTCTTCTTCTTTTTCTTGTTCTTCTTCTTTTTGCTTTCTACTGGGTC
TGACTCGTTAGCTTTTGCCTGGTCTTGCTGTTCAACGCCTTCATTCTCCAAATTCAATTC
TTTTAAATCAGAAGCAGGGGAATTTTCTATTTCAGCGTCTGTCATTTTTCAATACGGTAG
AGCTTCTACAGCACTTGTTGATGTAAAAGCCCACTTATTAGCTTCTTGCTATGGCTTCCT
TTCTTTTTTAAGTTCGCTTCTTTCCCAAGATTGAAAATAAAAAATAAGTGAGACCAGGCC
ATTAAAGGTCCCTTGAAGAGTAAAAAATCTGTCAAATATCACCCATAAGAGCACAACCAT
AATGTTGAAGAGCACGCTGAGGCTTTCAAGAATCTCTCTCAGAAGAGGTTTCACAACGAT
CGATTGTTTACGCCAACAAAATTCGGATATCGATAAAATCATACTAAATCCAATCAAATT
AGCTCAGGGAAGCAACAGCGATCGTGGCCAAACCTCTAAAAGCAAAACTGATAATGCAGA
TATTTTATCAATGGAAATTCCAATAGACATGATGCAATCTGCTGGGAGAATAAACAAGAG
GGAGCTTCTATCCGAGGCGGAAATTGCTAGAAGTAGCGTGGAGAATGCACAAATGAGATT
CAATTCTGGAAAATCTATAATCGTGAATAAGAACAACCCTGCAGAATCATTCAAGAGATT
AAACAGGATCATGTTTGAGAACAATATTCCCGGAGATAAAAGAAGTCAACGGTTTTACAT
GAAGCCGGGGAAAGTGGCTGAATTGAAGAGATCTCAAAGGCATAGGAAGGAATTCATGAT
GGGCTTCAAGAGGTTGATTGAAATTGTTAAAGATGCCAAGAGGAAAGGATACTAATCGTA
CCATCAACTCTTGAATATTGTGAAATTTTCGCCATTGATTTCCGTCTTTGTAAATAGGTA
ATGCGTAACTATTTAGTTAAATTTTTGTATATTTTTTATTCTATGACTTCACTTATCCAT
TATTTCCATCGTCAGAAAAAGGAAATAAATACTGTTGCTCGAACGAACAGCAAGATAAAG
TGGAAACGAAAAGTAAGCAGCTTCCTCAATATGCCGTCAAACGTACGTTCGGGAGTCTTG
ACTTTGCTCCATACAGCATGTGGAGCAGGCGTACTTGCAATGCCGTTTGCATTCAAGCCA
TTTGGGTTAATGCCTGGTCTGATAACGCTAACATTTTGCGGAATATGTTCCTTATGTGGG
CTGCTATTACAGACTCGAATAGCGAAGTACGTACCTAAATCTGAGAACGCCTCGTTTGCT
AAACTCACCCAACTAATCAATCCGTCAATAAGTGTAGTGTTCGATTTTGCCATTGCTGTT
AAATGTTTTGGCGTTGGTGTATCTTACTTAATTATTGTTGGTGACTTAGTGCCACAGATA
GTGCAGTCAATTTTTTATCGTAACGATGATAACATGAGTGGTTCGCAAGAGCATCACATG
TTCTTAGACAGGCGTTTGTATATAACTCTGATCATGGTGTTTGTTATCTCCCCTTTATGC
TTTAAAAGAAGTTTGAATTCTCTACGATATGCTTCTATGATTGCCATTGTTAGTGTCGCA
TATTTATCTGGTTTGATTATTTACCATTTTGTAAATCGGCATCAGCTAGAGAGAGGGCAA
GTATATTTTATGGTACCTCACGGAGATTCTCAGTCTCATTCTCCCCTGACTACATTGCCA
ATTTTTGTGTTTGCTTACACTTGTCACCACAATATGTTCAGTGTAATTAATGAGCAAGTG
GATAAGAGCTTCAAGGTAATCAGGAGGATTCCGATTTTTGCCATCGTGTTGGCCTATTTT
TTATACATCATAATTGGTGGTACAGGTTATATGACATTTGGTGAGAATATTGTAGGAAAT
ATCCTCACTTTATACCCGAATTCCATCTCCACCACCATCGGGAGGTTAGCAATGCTGCTA
TTAGTTATGTTAGCATTTCCATTGCAATGCCATCCTTGCAGATCATCGGTAAAAAACATA
ATTATATTCATTGAAAATTTCAGAAAAGGTAAGTTATACGATAACAGAGCTAGCTTTATT
CCATTGGACAACTTTAATAGTGAAGATCCGCAGGAGGAGCCAACCCAACAAAACAACGAA
GAGCCAAATCTGCGTAGTGAGTCTTTACGGCATATCAATATTATCACCCTTTGTATCTTA
CTGTTCTCATATCTACTGGCTATTTCAATTACGTCTCTAGCAAAAGTCCTAGCAATAGTT
GGTGCCACGGGATCTACGTCGATTTCTTTCATTTTGCCAGGCCTTTTTGGTTATAAATTA
ATTGGCTCAGAATTTATGGGCACGAATGAAAGAGTACCGACAAGCATAAAAATATTCAAA
TACTTAAGTTTATCTCTATTCATCTGGGGAATAGCAGTAATGGTAGCTTCACTATCAGCG
ATTGTATTTTTGGGCACATCATCGCATTGACTTTGTACATTACTTTTCGTATTTCTATAA
ACAAAAAAAAGAAGTATAAAGCATCTGCATAGCAATTAATAAAAAGGTGACCATCCCATA
TATATAACACTCAAATTTGATGGATCCGTGGCTTGCTGAATCAAATCTTGTACGCTAGAC
TCTACACTTAGTCCATTACCCATAAGCTTCTCTTCTACACCTTTAAGGGCCCTATAAGAC
TCTTGGTTTTCGTTCCTGTCGTTGTTACTTATGAACTTGCTGACGTTATCGAAATTTGTA
ATTTCATGTTCTTCTTCAAATAAGTGTTCGTATTTTTTAACTGGTGACATTACCCAGGAA
TAAAGGGGATCCCATTTTAAGATATTCAAAACGCACATCACCTTGACATAATCTTTTCTT
AATACTGCGTAAACTCTTTCACAACTCCGCCTGAATAGGCCATCCACGCCTGTGACTCCA
AATCCATCAACGATATCTCTAGTTAATCTGAAAGGGACCAACTCTGGAATGGGGAGTAAT
TTTCCCTGATCAAACGCAATTCCCAGGTCTATATGAATAGGCTCCCCTGTTGAGCAGTCA
AGCAGGATATTGTTCAAGTGCCTATCACCGAGGCCTAATATGTATCCAACGATAGAGCTA
GCTGCGACACCTTTTGTGTACGTTTTCTTAGCTTCAAACCAATCCAACGGATCGGGAAAG
GAATCAAAAAAAAAGTTTCTTAACTGCGGTTTTATTTCATTAGTGATTTTTAAATAAGCT
TTCAGCCTCTCTTCATTTGATTTTGTTTGAACTGCTTTCATGCCTTTTCTTGCCTGATCG
AAGGTTATCTTATCGTTGGTATGTAGCTTACTCAAAATTTGATGTAATGATGTAGAATTT
GCGACAAATTCAATGATTCCTGCCTTTGGTCCTAATGGAACCACTTTGTATGTTCTAATA
CCCAGATCTAGATTTCTTAATACTTTATCATTTTGTAGAACTTTATTAACTTGTTGAAAC
ACTTGTTCCATAATTGCATCTTGTCTCAAATCGTCATTACTTCCTTTCATCAAAGCTTTC
TGCGTTGTACCATCTGAGATGTTGAAGGTGACTATTTTCGGCAGGGACAATCCTGTGGTA
GTAATGCCTACTGTTTCATCGACGGATACAATATAAGGGCGGGCTTTTCTTCCATCAGCA
GAACTTTTGACTGTAAAATTACTGGTCGGTAGGGGAAGCTTCTCCATGTTTAGCTGTTTC
AGCCAATATTGGCCAATCTTCAAATTAGCTAAGTGTAACGTCTTCGTATTTTGCACAAAC
TTAAGATTAGCTAACTCTACAGACATCTCGCAAAACTCTTGCACAGGAAGTAAATACTTT
TTCGCAAAGGCACCCCTGTCATATCCTTGCAATTCTAAAAGAATCTTTTTGACAGCTTGA
ATTTTTTGGGATATGTTGGTGTCCTTATTGGATTGCTTTTCATATAGTAGTATGCTCATC
ACTGAATAAAGGGAGTCATACGGTAGTTTGTAAAGAAGTCGTTTCATGGTTAGTTGCAAT
GGCTTTTGAAATTCATTCTCCTCCATAGATATTTTTGACGCAATCTGATTGACCCAGGGC
AAAAACTTCCAGCTCGGTATTGTTCCAATTTCTTTATATAGTAATTGATTGATCTTGCTA
TTGTCATCATTCTCGAACCATAAACCACAAAACTTATCAATAATGTCATTATCATATCTG
TTGCTGAAAACTAAGGTATTGAGATAGAAATGGAGTGCATGCCATAAAAATTTTTCTTTT
TGAAGAAGCAGTGCCTTTAGTACTTCAGAATCTCTATTATATTGTAGCAAGACACGATTA
TAATGCCTTTTCGCATCTTTTCTTTCATTTTCTGGTAATTTTGTGTTTTTATATATCAGC
TCCAAAGCTTTCAAGGTAGATTTTCCAGTATATGACCTATGTTCTCTATCTTCGATTTCT
CCATTTGATCGTAACTTTTGTGCCTGTTCATCCAGAAAACTTCCGAGTGTGTAGAAAACA
TCAGAACATGATTCATGATCTTCGACATTTATATCCCAATTGACAATGATTTTCTCATAT
ATTGCAGCAGCTGATTCAAGCCTTGATTCTGAGCTCCATTTAACTAGTCGAGCTTTAATT
TGGTCCATAGGCACATTAATGAGTAGCTTAAAATCGTCATAAAGGATACTTTCGCTAATA
TTCTCCTCATTTTGAGCTAAAAGATCTCTCATTATCATTACAGGTGCCTTGTACTCTCGA
GACTCCCAGAGGGCATTAGCAGATGTGAAACTTGCCAATTTCTCAATTTGAGATACTACA
GAGGGATCATCGTATAATTTTGCAATATTCTTCACTGTTTTGCTCATTAGAGTGGCATTT
CGTAACGCATCTTGAGGCGCACCATTGGCAATTGCCAGCTGAACGTAATTAGCAAGCTGA
ATAATGGATCCAAGGCGTAAATATTTCGAGCATTTTACGTTTTCATCTAATGAATTCCTC
GAGAGCACATTCATTAAAGTATGTCTACTCTTTAACGTTGTTTTGTGATCATAGAAGTCT
ATTGTATTCAGTCTCTCCTTATCGGCCTTCATAATAGACATCAATGTTTGCGGGAAGGAA
GTAACGTCCTGAGGGATTGCTGCTATTTTTATAAATTCAATAATCGCGTTCAGAGTATCC
ATCCATTCAGTTTGGCTAATAAAATGTTGTCGAGAATCAAAAATAGTTAATAAGGATTTT
TCTAAACTTTTTTCAGCAAAACCAACGTCCTGTGGTAAATTTTTTATGGCATAGTATAAA
CCTTTGGCTTTGGAATCAACAACTTTTGGAGTCAATAGTTTCCAGTCTCCCAATTCTACA
TTCCATTTGTAGACATCACTGGATCCAGAAAGTCCACTTTCCAATAAGCTTGTCAACCCG
TAGAAACCGCTATCTTCTGTGGCCTTGATTAATGATTCCTTTTCCTCTTCTAGTGAAGTA
GTGTAATTGGCATCAAAATCGGCGTTGTTGAAAAGAAAACGTTTCCAGGTATCTGAGTCA
ATTCTATTGATAGAGTTTAAAACACCCTCTATTGAGTGTGGAACAGGTAAACCTGCTAAA
AAATCGCCGTCATTTATGCATTCGTAAATCTTCTGAAGTGTATTTATATTCATTTCTCTT
ATGTTTGGCATGTTCATTTCCTCAAATAACAAATAGCCAAACTTGAACTCTTCTATTTTA
AGAGAAATTTGACATATTTCTTGTAAATCTAAGCTAGAATATATGCGCAGACAGTTTCGT
TCCTTGCATCTAGAACCCATCCTAATCATTTTAATTACATTGAAAAGCATTTTTAGCTTT
ATCTCAGAATCTTTAACATGCAGCAACATTGATATTTGAGTGAATATTCGATTGCTCCAA
TTCAAACAGCTTTTCGGATCATAAGTCGTTGAAAGAAAAAAGAGGTCAGTAAGTACTAAT
TCACAAAAAGCTGTTGATCCTTTGCATAAAGGATACAAGCAAACAATAGGAGGTATATTA
AATGATATTTGGTGAATCAAACTACGGGCGAATTTGCTTAGCCAGCAGTTGTAGGGTTCG
TTCACTGACAAATAAGTATCGCATATGAATGATTCCATCCCAAAATTGTTTGCCAACGGG
TATATAGCATTCAGTACATCCTTATCCAATGGAGCAACTTTATCTTTGTTCTCGTTCATT
ATGTTATCCCTAAAACAAAATTCACTTTCGCTATTTCCCATTGAGTAGCCCACTAGGTAC
GTTAGAATGCACTCAGAAATAAAAAACACTTCAGTAGAATCATGTAACTCAGCTTCTTTA
TTGAAGGTTGAAATACGTTGGTATATCATATGTGGTTGTTCGGGATGACGAAATACCATT
TCAAAGTTTTTCAAATGAACTTCATTATTAAAGTTTGTAGATCTCTCTGTTTGAACTTCT
TGCTGTAAAATTCTTCTTGAAAGAGCAGCGAACCATAGTTTGAAGTTTTTACTCAAATAT
TCCTTTGGAACATGGTGCTTCAAAATGTTAATTGCAGCAGCTTTGGAAAGCGAACAACCG
ATTTTTGAAGCTACCGGTCTCCTGGCATAAGAAAAGAGTAAAGAAACCAATACAACATCG
TCTACGCCACAATCACTAGCATCCAAAAGTTCCGTATTTTCATAAATATCATCTTGGACT
ATATTTCCGAATATTGCATCAAGGCAGTATTTCCAAGTTTTTATTTTGATGAGATCCCGA
TGCTCTAATAGCTTTATAGCCTGCTGGAAGGATGGACTGAGCTGTTTGTTTTCCCTCAAA
TAAATGAATATTTTGCAAAATAAATTGGGCAGAGATGGCTCTATTTCAAACGTATTTTTG
TCAGCCAGATTTAACAATGAGCTGAAAATTGTTATTACTTCATCGTGAATTTGTGTATCT
ATTAAGAATTTTGAAAGCCGAATTATGATGAAGTTTAAAGTTGATGATTTTACAAGTACA
TTCTCATACAACACAAAAAGATATTTTAACTCCCTTGCACATCGCAGTTTTCCTATGTAA
GTCGATGTCTTTTCAAGGTCTGTAATAACCGATAAAAACAAAAGCTTGAATTTCTGTGTG
TTGTTCTTTTCATGAGCAAACTGCGTCTGAACTAAGGTTGCTCCTAATGCCAAGGGTATA
TGAAGTGGGTATTGATACCTCATTGAAACACTGGAATTTTCAAATAAATATGGCGAAAGG
TATGAAGTTGGGAATAATTTTTCAACAGTCGATCTAAGTTCAGTAAGTGAGCCCAAATCA
GTAAATCTTATGATCCACTTTAACATCAGTAGACGGTATTTTTTATGGTATTTTACTGTT
GTTTTACCTGATATTTGGGGCAATATATCAAATATTAGTTCATTCACACCGCCACTGATA
AAGGCAAGTGGAATACACAAGTAATAGCTGTTATCCACCAGATAAGCATCACCGTTTCCA
GTAATCGCGTGTAACATGTCTAAGATCCATTTTTGGTTGAAACCTTGAGAAAAGTAGATT
GCAGAAATTTCTACAAAGTATCTTCCTAAAAATTCATGAATATCGGCAAATCCAAAAAGA
GATATATCCCATTCTTTCTCCAATTTAGAAGTAGGGACTTTTGTTCTGTTAAACCAGTAC
ATAATCAAATCAAACTTACAATATTCGAAGAGCTCTGTAAGGTTTTGGTAGCGAAAAGCG
ACCGTAATTTTGTTCAGAGCTTGTTGGATAAACGCACGAGTATGATTGAAGCCAGAGTAT
GTCATCATATCCTCCAAAGAAAAAACTAAGCTTGGGTAAGACACCAAAGACAACATGGAC
ATTGCAAGAGAGTAGAAAGCGGACTTTTCAATACTTTGCTGAGGCGGACCAAATAAGCTC
TTAATCTCATAAAATATGATACTTTGATTCTTATAGCTCACTTGGGCCATATAACTCGAA
ATACTGTTCATTATGTTAATAATATTGGAGGAGTCTAGCTTTTGCAGGCATTTAATAAAA
GTTGCAAAGACTCTCTGCTTCCCACCTCTGATTGATCCGTGGGAAAGATCATGATTTTGA
AGTAGGCTAAGCAGCAGCATAGAAAGGTTGACCGTAGGGGCCACACCAGTGAAAGAATTG
TCCTCAAATCTTGATATGATCCAGTCCAGGATATCATTGCAGTCCGAATTCAAAGGCTGC
TCGGGGTAAGATAACCATTGAGGTCTTATTGCTTCGATATAAGATGTAAGTAAAAGCATA
GCTTGATTGGAAGAACTATAGTGGTTGCAAAGCAATTTTTCACCCAAGACTTCAGTGAAT
TCTTCCAGGATTTTGTTGTAAGAAGATTTCTCCCCGATTGCTTGTTTTAACCACTGGCAA
ACAGTGCCAAGATAAGATATAAATACATCTGTGCTAACGCAATCAGAAAATTCCAATATG
GCTACCAAACGCTCTGAAATGGATTTATTTCTTGAAGACCATAGGTAAGCTCGCACTGCT
TTATCTATAGTGGAGTGCTGAGGCTTCTGAAATCTACCTCCAATTGTGTAAGGACTATTA
TTCTGGGTAGTGTCTTCTGAAGAGGCTTCGAAGTAATTGATGGCAGAAGTTCCTGTTTGA
GATTTGTTTTTTTGCATCCTGATAAAATCATTAACGATTTCCTTCATATTAATTTTGTCA
AGCACTAAATGGTCTACATTTATGGTCCGTATCGATAAAACCTCCTCAAAAAATGATTGG
TAGGAGTTTTTGCTATCAAAACTAAGTTGTGGAATAGTTATTAAGGTTGTTCTCTTATAT
GCTGCAATAAACTCAGAAAAAGTGGAATCTCCACAAAGATTATCAACTATTTGTATTAAT
TTTGCTACCCAAGTAAATTTTTGTAGTGGAGACGAAAATGCATCACTTTCAATATTTTCC
AGTAATCTGTAAAGAATTTCATTATAACGTGTGAGGTCTAAGGAAACTTTTGGTAAATTA
AAAAAGGGAGTGTTAAAACATTCTGACTTTTCTTCTGGTTTTACGCCTAAAAGAAATTCC
CTCTGCTCTTGAAAATGTTGCCAAATCTTGTGGCTTTCATCCCAACATAGTGAGACAGGA
TTAGCTCCTTCGCCTTTTTTATCGTTGAAAGGGTTCTCTGGGTCATATTTGTTACCTAAC
CAGGATATAAAATTGCAGAACTGATCCTGTTTAGCATCAGTTCCGCGCAACTGGTTCCAC
TTTGATTTTAGCCACTCAAAAATTCTATCAGCGGACGATATACCGTTCATAGATTGGAAG
TCTTTACCAACGTACTGAAGGTATCCCCATAGCATGAACGATTCATTAGTAACTAATATG
GGACCCAAAATATCGGATAATTCGTAAAGATCATATATCTGATTGATAGTTTTCTCATCG
GATAAAAGCTGCTTTGAAAACTTTATGGAGTTGGCTAATAAAAGACAACTTAACTGGCAA
GATTCATTTGATTTTACTAATGGTAAGCAAACTTTAAATAGGCGTGCCATGTCGCCATTG
CTTAATTCGCATTCTTTTTGGGATAATAAAGGAATAAAAGAAAAACAAACCCAATTAAAG
CATTGGATTTTTTCGAATTTTGAAAACAGAAGTTCTTTCAGCTGTTCTGCAAAACTTTTA
GTGAAGTCTTGTAAAGTTCCATAAAATGAGCACAATTGTAATCCTAGCACTTCAAACTCA
TGTGAGCTGTTCTCCTCTAAAAGATGAATAAGAAATGTGTCCATATCGTCAGAAATCCGT
AGGATAGAAGGTATATCCGAATCACATTTTCTTCTTTTAAATAATAATGAGTAATTTTCA
TTTTTTCTGTTCAATGCAAAATATGTTAACAATGATTTGGTAATTCCGAGTATTTTTAAC
CACACCGATCTGCCTCCCCTATCTCTAAGTCTAAAATCAGGTAATGCAAACCATGAATTT
TTATCCCTTGAACCTCGAATATATGAGAATTCCACATGGTTTACGGTAAATAATTGAGGC
TTATAATTACTTAAGCGCAGTAGAATGTACTCACGGTATAGAGATACAAGAGATTCGGAC
CGAAGCTCTTCAACATAATTCTCTTGACCAATCATATAAGGAAGTTTATGGTTCATTAGT
TCACTTGACATAACATCAAACAGTGATAATTGGTCTTGTACTAGCTCATTGGAAGTACAG
CCAATTGTCAGGTTGTAACTCCATGCTTCTTTTATAAGCATTAGCGTATCAATAACACTA
AAACAATGGCACTTCAAAATTAATTGATTTATTAATGACATTATTAATCTCGTATTTCCA
TTTTCTTTTTTGCTGAGCCTCAAAAAATCTATTACGGTCCAAGTAATTGTCCTTGTCACT
TGATATATACCAACTGTGTCTAACGCCAATAAATTCAGGAGGATCGATATGAAATTGGTC
AATGTTTTGTCTACCATAGATAATTTCATTTGGCTTTGAAAGTACTCGCAAATTTTATCG
ACTAAGGATATCCATTGGTGTATCATGAATTTCAGTTTGAAAGGGTCACTTTTAATTAGG
GCATCCAAAGCAAACGATAAATGTACTGAAACGGCATCCAATAAACTTTTGGAACCATCT
TTGACCATTAATTCAGGTACTACTGCTAAAAGTAACTTCAACGTTTTCACTTTAAATCTC
TCACATGATTTTTCTACAAATAATCTTAAAACGTACGATATCGTGGAGAGTCTGTTCTCA
CTAAGTGATAGCTTGTTTGTCGTTGACACTGTCAAGTTTCGAAGAAGCTCACAGTATTTT
GTGTGTTCAGATGCAAGTAACTCTACCAAAGCTTCTGCCGTTGTAGATAGGGCCTTGGTT
GGTATCCTTTCCGGATCTTCTTTTAAAATTGTTGTTAGCTCATCTAAAGCATTGTTTCTC
TCTTTGATTTTTGTTGATGATAGAAAGTTTAAAGTTTCTACAATCCCATGATCCTCCATC
GTCTATGTTACACTGATTTCCCTTTTTCTTTGAAGGCTTTTTTTTCGAATTTCCTGCTTT
TTTTGCGAGGCTTTGAGAAGTCAATTAGTCTTGATTATTCTATTAACTTGGAACTAATTT
ACCTTGAAAAATGTCAAAATATGCATATTGTACGGCTGGTGCCATACTTGTTTCTCACTA
GCAAAACATTCTATCATCTGTTATTCTTACCTTCTTAACGTGTCTGTTTGCTTTTTTGAC
GTACCCCAAAAAATATATAGACCCTCCTATCACGCTCATAATATCATGTGATTCTCTCGA
TGAACGATAATAGTAATATTTTCATCTAAAAATGCAATGAATTATTGAGTTTCTTTAATC
TGTTTAAGAGACTGTTATTTATAAAGAAAATATATATAATTGAAGAATCTAAGAGTATGA
GTCAAAATAATTTCCTTTTTACACAACAACACCGGAGTTAGATGCAACTCTTGGCCATAA
ATCGGCACATTCCTTACCGACTGGACCAGTGATGGCGGAACCCTTCATTTCACCCTTAGG
ATTAGCGATGACACCAGCATTGTCTTCGAAGTACAAAAAGACACCGTCTCTTCTTCTCCA
AGACTTAGCTTGACGGACAACAATAGCTGGCATAACCTTCTTTCTCAATTCTGGCTTACC
CTTCTTAACGGTGGCCATAACCATATCACCTAGAGAGGCGGCTGGCAATCTGTTCAATCT
GGAACCAGAGCCTTTGACGGCGATAATGTACAAGTTTCTGGCACCACTGTTGTCAGCACA
GTTCATGATGGCACCGACTGGTAGACCTAACTAGTTAAAAAAGATCTCAATATCGGGGAG
TGAGAATAATTTTGTTAGTAAAAGCATAGGGAGAAAGTAAGCAGATCTGATTAATCTTGA
AAAATAGAGTTAAGCGTGATTTTTGTAGAAATAACATTTCGATGGCCATCCATTAGTATG
GGCAAAAGAGGGAGTTAGGATATGCTTGCCGTGTATGATTTTGAAACCAGAAATTTTTGA
GTCCATGAATATTGACAGGTATCACTTCATCTGCAAATACAGCCCGCTTAACCATTTAAA
AACTGAATTTATGTGTGTAATTGCATCTTTGGCGGGGCGGTACCAGTGATGGCACATCTA
CCATTCTTATGGAAAATAACACCGATAGGTATATGATCAGGCTTCACACTTAGTGTTTAG
CGTCTTTTAAACCTCTGTTTAATTCTGTTGTACCCAGCAAAATGAAATCTTGGAACTTTA
CTTTATGATCAATTTAACCAAATTGCATTGTGGAAAATAAAAATTTTAACATACTGAGAT
TCTAAACTTAGTACCTTGAGCACCGTTACCGGACATTATTAGTTATATATAGGTGTGTTG
GTTTTGTATTGCTTGTAAGACCTAAGAGTCAAAATAAAGAAAGTAAGAGATTTTTAGCTA
CTAACCTTAGCAATACGATGGTATTACTATTAGCGGGAACAGGTACATTATGGCTACAGT
TCGTTTCCTGCCATATTAATTTTTCAGCCCGAGCGTGTTTGGGTTTGATATTTTCTTTTT
TACCTCTTTTTCAACATTTCCATGCAAGTCTGATGACGGTTGTACGGCTCGTTCTGTGAG
CCGGATAAGCGATAAAAAAACTTGGTCTGTTGAAAATAATAACTGCATGGGTTTTTCAAA
GCAGTTGGGGGTGTACAGATGTTAATGTAGTCTGATATATGCTCTGTCTTGTCTTTTTAT
CTGGGGGATCATTAACATGGTAATAGTGATTGGTATTGCAAGCTTAAGATTATAATTACA
TAAAACAATACAAATATTCTAGCCCGATGGGGTTATTATAGACCAGTTTTTGTTTTCTCT
TATTCTATCTGTTAAAAAGTCCGTGGGGTTATTGTCTTCGACAGAGTTATTATCCTTGTC
GCTCCCTTTATCATTAGCCGTATTTTCGTTATCCTCGTCATTATGAGTCCTCAGTTTTGC
ACGTTGTGCTCGTGACATATGACTCCAATTCTGCTTTTTCTCCAAATACTCTCTTTTGCC
CATTGTGCTGTAGCCGTCATCGCTTGGATTTGGAGGCCAACTACTTGCCTTGTTCCCAAG
GTTATTGCCATAATTTGGATTGTAGTACTCTTCTTCCATTTCGTTCAATCTCAATGCCTG
TAAATCGATTAAATTTATGCCCTTCTCGTTCTTAGCCCAACCGTTTCCGCCTTGTAAAAT
ATCTTCCACGCATTCTCTTGGCGTAAATTCACCTGGTCGAGGATCCCACGGTAATTTAAA
CGTTTTCTGGTACAAGCTCTCAATCAGTGGGCTCATAGAGGAAGATATTGTTGTTGACAG
CCCTGGCTTTGTTGTCATTTCGCTACTCTTGTGGTTGGTAGAAGTCGGTGATTTAATACT
TGTGCTGTTTCCTGTCGCATTTGTACCGGGTTTCGCTACAGTTGTTCCAATACCGTTAAA
ATTGGAGAATGTATTCTTGGGTGACATCTGGTTTGTTGTTGATGTGGGGCTAGATAGTTC
AGACGTGTTATCCAGTATAGTATTTATTCCTGGCCTGTAATTAGCGAGCTGGCCATTAGT
AAACGATTTGGAAATGTTGAAATCTTCGTAAGAGCCTCTAACTAGCTTCAACTGCAATGA
GACGTTGATTATAGAATTGACCTTTGAGTGCTTTAGGAGAAATCTGTTTGTTGTGGGAGT
TTCGTCTTCTTTGACGTATTCTGTTATATCTATGTCTACTGTTCCCAATAGAAGTTTACC
CGTTATCTTTTGAGAATATGAATTGTTTCCTGTGGCCGTTAGTGCAGTGGCGTTAGCATA
GGTCGTTTTCTTCACTTTGCCATTGGGACTAGAACTAGAAGTCAACGAGGAATTCGCATC
AGCAAACTCAAAAAAAACATCCAACACCAAAATTTTCTTCAAGAATCTGCCGTTTTTATC
CAAGTGGAGCTTCACCAGGATTGGTTTGTCTAATGAATAATTCCATTGTGCTCTATGATG
TTGCACATGCACGTGTTTTGTTGTACCTCTACTCTGGGTCGAAGTGGTTTGATGCTCACC
GTCCAGAGCCACTTTGTGTCCCGACGTACCTGTTCCATCCTTCAAACGCCATTTCGTGTA
GCAATAGCCAGAAGATTGAGGAATATTTACCAATTCTTTGATTTGCAGGTCCAGTAGAAA
CTTTGGTCTTTTTGCCTTGCTATTATGATTAAATGGCATCTTAATATTTTGTGAGCGGTA
TTATACCTTTCTTGGGTACCTAATACTTCTAAGCAACCTGAATGAAATTAGAAGGTGTTC
ACTCCTTCATTAGCAAGTGAGCTTTGCCGTTGTCACCGTACTTGGTCATCTTAAGAGATA
CAAAGGGGGGGGACCCTGAGAAAACTTCTCCCGAAAAAAAAAAAGAAATATACCCACGCG
TTCTTTACCCGGAAATAAATATCTTGATTTAGCCGCCGAGATTGTTATATATGCATCCAA
GACCTCTGAATGGTGGCTAATTAAGACACTTAACTGATTACGTTTCCATCAACTGCTATC
ATGTTCGCAATATTTGGGCAAGAAATGAAAAAGAAAAGTTACCAACTCTTCTCCCTTCTA
CGAGCGGTGAATACATGGGAGCCGAGCCGCATGAAGATGAAAGTAATATTAAAATTAAAG
TCTCTATCGAAGCAGTGACTCTCTCCCTATCAGCCGGTAAATTTTTTTAACGAAGTGGAG
CTAAATTATCAGAAAACGTAGAGCTGGTATGCTGGTAGATCTAAACGAAGTCCAGTTTAC
ATCAAGATGATATCGTGCAATATTTACTACGGCATGACTTAACAGTACAGTCATGATTTA
GGAATTTGAGTGTTCTCCGGGGTTTTGCAGATAAAAATTTGTTTTCTTCTCTGCCATTCC
TGGAGATTTTGAAAAGAGTTGGTAATGTGTTTCAAAAGAAAAAAATACATTCCAAGAATA
AATACCAGGATTTCGTGACAAAAATTAAAAAAAAGGGAAGTATGGCATGCCTAGAAATCT
TTTCTGGAAAACTTGAAGCATATCATATAATTGTATGAACTTGTCCTTCAAAAGATGTTA
CCAAATATTCAAGAGTATGTGAGCTTTCTATTCTATTGACGCGTAAGAAAGGCTATCACG
TGTGGGGGGGAGAGCTCAGCCACATTGCACTACTTTCGAAACCGCGTAGTCGGAAACGAC
ATTCCCCCGTACCAAAACAAACGAAAGGACGTGAAAGGTAAATGAATAACATGGCACTAA
AAATTTGGCAGAAAACGAAAAAAAAAAGGAAAAAGAAACTGAAAACTATACGCTTCCCTT
AGGATACTTTCTAATTTACATCCGAAGAATTGGGTGCGTCAATTAAAGGCAATTCTTCGC
TCTATCAAGCAGTTTTACTGCGTCTGTCTAAAGAAACAATTGTTTTACTGAATTTCAACA
AAGTTCTAACTCGAGGTGACCGGAGGCCACTGCAATAATAAAAAATAGAAGATGAGTCTC
GAAGGAAATACCCTAGGCAAAGGGGCCAAATCTTTTCCTCTGTATATTGCGGTAAATCAG
TACTCTAAACGAATGGAGGACGAGCTCAATATGAAACCAGGTGATAAAATTAAAGTCATT
ACTGATGATGGGGAGTACAATGACGGCTGGTATTATGGGCGCAATTTGAGAACCAAAGAG
GAAGGTTTATACCCAGCGGTATTTACCAAAAGAATAGCAATAGAAAAACCAGAGAACCTG
CACAAATCACCAACCCAAGAGAGTGGAAATTCTGGCGTTAAATATGGAAATTTAAATGAT
TCTGCGAGTAACATAGGTAAAGTCTCCTCGCATCAACAGGAGAACAGATATACATCATTG
AAAAGTACAATGAGCGATATAGACAAAGCCTTGGAAGAGCTAAGAAATGGTTCAGTTGAA
CAAGAGGTATCAAAATCGCCCACACGCGTGCCCGAAGTTAGCACTCCACAGTTGCAAGAT
GAACAGACTTTGATTCAAGAAAAAACCAGAAATGAGGAAAACACGACACATGACTCGTTA
TTTTCTAGCACAGCGGATTTAAACTTAAGTTCTGAATCTTTGAAGAATATAAGTAAGTCA
AATATATCAACAAAATCCCTAGAACCGAGTTCGGAATCAGTTCGTCAATTAGATTTGAAA
ATGGCTAAAAGTTGGAGCCCAGAAGAGGTTACTGATTACTTTAGCTTGGTTGGATTTGAT
CAATCCACTTGCAATAAATTCAAAGAGCATCAAGTCTCCGGAAAAATACTACTGGAATTA
GAACTGGAACACCTAAAAGAATTGGAAATAAATTCTTTTGGTATAAGATTTGAGATATTC
AAAGAAATAAGGAACATCAAGTCTGCAATTGATTCGTCGTCAAATAAACTGGACGCCGAC
TACTCTACCTTTGCTTTTGAAAACCAAGCTGCCCAACTAATGCCTGCAGCCACTGTAAAT
AGAGACGAAATCCAACAACAAATTTCCTCCAAGTGTAACAAGTTGTCAAGTGAAAGCTCT
GATAGAAAATCATCTTCGGTCACCACAGAATTGCAAAGACCAAGCTCGGTTGTTGTTAAT
CCCAATTTTAAACTTCACGACCCAGCTGAGCAGATCCTAGATATGACAGAAGTTCCTAAT
TTGTTTGCTGATAAAGATATTTTCGAATCACCGGGAAGGGCTCCAAAACCACCATCATAT
CCAAGTCCAGTTCAACCTCCACAATCGCCCTCTTTTAATAACAGGTACACAAATAATAAC
GCAAGGTTTCCTCCTCAAACAACATATCCACCTAAAAACAAGAACCCAACCGTTTATTCA
AATGGGCTAATTCCAAATTCTTCGACATCTTCCGATAATTCAACGGGCAAGTTCAAATTC
CCTGCCATGAATGGTCATGACTCGAACTCTAGGAAAACAACACTGACATCTGCTACTATA
CCTTCTATTAACACGGTTAACACAGATGAATCTCTACCCGCAATTTCAAATATATCTTCA
AATGCTACATCTCATCATCCGAACAGAAATTCCGTTGTTTACAATAACCATAAGAGGACG
GAATCCGGAAGCTCATTTGTTGATTTGTTCAACAGGATTTCAATGCTATCGCCAGTCAAG
TCAAGTTTCGACGAAGAAGAAATGAAACAACCTTCAAAAGCTAGCAGAGCAGTTTTTGAC
TCAGCACGCAGAAAGTCGTCTTACGGACATTCAAGAGATGCCTCACTTTCTGAAATGAAA
AAGCATAGGAGAAACTCTTCTATATTATCTTTTTTTTCTTCAAAAAGTCAGTCTAATCCA
ACGTCACCAACCAAACAAACTTTCACTATCGATCCCGCAAAGATGACTTCCCATTCTCGT
TCTCAGTCGAATTCCTATTCGCATGCAAGATCACAATCTTACTCCCATAGTAGAAAACAC
TCGTTAGTTACCAGCCCCTTGAAAACTTCTTTAAGCCCTATAAATTCCAAATCCAATATT
GCTTTAGCGCATAGCGAAACTCCTACTAGTAGTAATAATAAGGAGGCAGTATCACAACCA
AGTGAAGGGAAGCACAAGCACAAGCACAAGCACAAGAGCAAGCACAAACACAAGAACAGT
AGCTCCAAAGATGGCTCTTCCGAAGAAAAAAGCAAAAAGAAATTATTTAGTAGCACCAAA
GAATCATTTGTAGGAAGCAAGGAATTCAAAAGATCTCCCAGTGAACTTACCCAAAAATCT
ACCAAATCGATACTTCCCAGGTCGAATGCTAAAAAGCAACAAACATCTGCTTTTACCGAA
GGTATACGCTCTATCACAGCAAAGGAATCTATGCAAACTGCGGACTGTTCAGGCTGGATG
AGCAAAAAAGGTACCGGTGCTATGGGGACTTGGAAACAACGGTTTTTCACACTTCATGGA
ACAAGGCTTTCTTATTTTACGAATACCAATGATGAGAAGGAGCGTGGCCTGATAGATATA
ACGGCACATAGGGTCTTACCTGCCAGTGATGATGATAGGCTCATTTCCTTATACGCTGCG
AGCTTAGGAAAAGGAAAATACTGTTTCAAATTGGTCCCTCCGCAACCGGGGTCCAAAAAG
GGACTAACCTTTACGGAACCTCGCGTTCACTATTTTGCAGTTGAGAATAAATCTGAAATG
AAGGCATGGCTGTCAGCCATAATAAAGGCCACTATTGATATCGATACAAGCGTCCCTGTC
ATTAGTTCATATGCCACACCAACGATACCTCTAAGCAAGGCACAGACGCTATTGGAAGAA
GCTAGGTTACAAACCCAGTTAAGAGATGCTGAAGAGGAAGAGGGAAGAGATCAATTTGGA
TGGGATGACACCCAAAATAAAAGAAATTCTAATTATCCAATCGAACAAGATCAATTTGAG
ACCAGCGATTACCTGGAAAGTTCAGCATTTGAATACCCTGGTGGCAGACTTTGAGAACTG
CAATCATTAGTTACTTCTTGACCAACTTAAACACCTTAATAATTAATATTTAATAGAACA
TAATTTAGTGATATAAAGTATATAAAAATAAAAAGTTTGCGAATTAATACAATCAAATTA
GACACTGATACTATCAAGAAGTACATCGCATGAACCGCAGACATGATGTCCTCTTCTTTC
AAATTACTGGATATATATATTATTATTATTGTTACCATTAACGTTATTATTATTAACTAT
TACTATTACATTAACTTAAAAATAAATATGAAACAACGAAGAACAAAAAGAATTATGAAA
ACATTTAACATGTTTCAATTTGTTATGTTTTGGCCAACCTGCGTTTATTCTTGCATATGA
CATTTTTGTAATTCATCGATGATAACTTGGTTACCCTTTGGATCCAAATTCATAGCAACA
GTTAGCTCCTTGATTGCATCTTTTTTCCTCCCAACTATTCTATATGTTTGACCCAGCAAA
TAATGGGCTGTGGCATCATCAGGAACGAGTTTCACCAATTCTTCAAAAGTTTGCAAAGCA
ACATTATATCTTGTCATGGAATAGAGCAACTGGCCCATCTTATATTTGGATAGCGAGGAA
GTCGGTTGCAAATGACATGCTAGTTCATAATATTGTAGAGCCTTTTCCTTATAGCCCAGC
TTTTCTAAAGAACCACCGCAACAACAGATTAACACAACATTGACGGGATTAATTGACCTT
GCCTTTTCAAAATATAACAACGCTTCTTCATATTGACCTAATTTCATAGCGCTCGTACCC
AATCCGTAATATGCATTGTAATGCTGAGGATCACAAGCTAGCGCCTTTCTATAGCATGTC
TTGGCAGAATCCGAAGAATCGTTGGAAGAATGTTCATGACCTTGCAAAGTATACGCGTAT
GCAAAATTTGGGTCTAACTGAGTAGCTTTTTCGAAGGCTTTTATTGCGGCATCATGATCC
TTTTGCAATGATAGCAAATTACCTATACAACACCATGTTTCGGGCTTATTAGGCATTGCA
TCCATTAGCCCATTTGCCAAATTTGAAGATTTAACCTTGTCATGCAAATGCCACAGCAAA
GTAGAAAAAATTTCCATATCTTTTACCCTTGCTGGTTGTAGGTCTTTCAATCTATTGAAA
TACTTTAAGGACATATCATAATTAATGATCTCAAAATGAAGTTTTCCTAATTGCACTAGA
CACCATGGCATTGTGTCTTTAATATGAGATGGGATTTGAGACTCGAACAGTCTTATTGCC
TTGAACGAATTGTATTGTGATGACGACCTTAATATTAAAGCGAAATTATACATGATTTCA
GGCAGCGTAATTGAATAATCACTCGTTAGTATTGAGTTACTGATTATTAAAGACCTTGGA
TTTTTCTTGGAAGTTGTTAACCTTCCTGTTGAGGAATATAGGTTTCTTGGAGTTTTGAAA
GTTGTTTTATTTATAATGTTATTATTATTATTATTATTATTATTATTGTTATTTTGGTGG
TTCCTATCGTTATTTAACAGTTTCGATGGAGGAGTCGTTAAAAGTTTGTTTCTGTTATAA
ACTTTGGCCAACGAGCTTATTGTAGGCTGTTTGGAGGATGGAGACACTAAGTTCATGGAA
ATGTTATTTGGTAGCGCAGAAGACGTCTTACTGTTGATTGCAGGGTTTTTAGGAGTTTGA
GTATTTTTGTTCTGGCAGGTCCTTATTGATGTGTTCGCTTGTTGCTGCTGTGACCTTGAG
AAATGCTGAATGGAAGAAAAAGAAGATGCCGATGTAGAAGGGGGAGAATTAGACGACTGA
AACAGTGTATTAACATTATTATTGATATTATTATTGCCGTTTTTGTTTGTTTTTGAATAT
AAGCTAGGTTGTGAACGAGGTTCGAAATGCGATAGTGATGTAGACGGAAACGATGAAGCT
GCATTATTATTATGACTATTACTTTTTTTCCCTGCAATGTCGAAAAAAACCCTTTTGAGA
TCCACGGTAGCTCTCATTTTACAAATTGCTTCGTAAGATTCCCAAAGGTAAGGATTAATG
GCTAATGCTTCAGAATGATAAAATGCTCCCTCCTTAGAATGGTCCAGTTTCATATAAAGA
TTGCCTAACAGGCAATTCAAAGTGGCCAAATCGGGAATATGGACGAGATTAGAATTCAAC
ACCATATTTATGCGCGTATTACTGCTGTTCGAAGAAAATACATTTATTATTGAGAGAAGA
GTGAGGATAGCTTCGTTAACTCCCTGCGAAAGCTGTAAAGCACAACGCCCGAATATGTAA
GCGATACCAAGATGATACTCCTTGAATTCTTTGGATATCTGGAACGCAGTGTGGTAGCTT
TTATTCAGAAACAGCGAAAGTGCATATAAATATACCGCATCGGACCAGTAAACACTTGAT
TTATCGAGAATGGAGCATTCAGCATAGAGCAGTTCGGCCAAAAACTCTGCGGTACTGTAG
TTCAACTGCTGAATAGCCTGCTGAATGCAGTCCTGAAGCTGTATGATGGTGCTCAAAGCT
TGATCATCAAAGCTGGGGATTCCTCTCGAGAGGGTGAACGGTGCTAACTCAGGATTTACC
GCCATGCTATTTTTATTATGTATCCTGCACGAAAAGTTCGTGTCGATTTATGAATAGATA
TGCAGTCACCAAAACAGAGTCTAAAACTCTCACAGCTAGGTATGGTTTTTTGATAAACTT
TTCTGTGGCACCTTTGCTTGCACTTTGATCCTTTTGGTTTACTTTCAGCCTGTTCTATCC
TTTTGATCAAAAAAAAAAAGGAAAATCAAGCGCGGGTAATAACGGCACCATTAAATACTA
GTAGTACTATATAGATGGTATAAAGAAATGATTTAAAACAATACGACTATATGATATTTA
TACATCTGTTTCAGTTGAGCTTTTTTTCCATAGAGCTGGTGGTACGAAGATGGCTTTTGG
CGAGGGCGACCGAACCAGATAGCTGCGTCAAGGCCAATAGAAGCAACAGAACAGTATTCA
ATGCCAACAATAGCGTGCTTGCTTGTGAGTTTGGTGGATAGGAATTCCAGCACCACTCGT
GCAAGACGTACCAAATCGGACCAACGAAGAAGGGCATTCCCGACCAAAAGATCAGTATAG
GCAAAGTCCAGTGATACCAGGATAGGAACTGGTAGTGGAGGGACCTTGAAAATAGGACGC
CGATGAAGTTGGATGCGATTAGAACGAATGGAATAGTCTTGGCGGGATTGGCATTGAGCA
CTGCATTTTTCCTCAGCGGATGGCACAGGGAAGACCATAAATCGGGCAGGATGCGAGGGT
ATCTTGTGGCGAACAGTGTGGTGAGCGCTATCAGATGGCTGATTAAAAGGGCCAAGTGGA
ACCTCTTATCATTGAAAGCCTCTTCATCCATCATTTGCCAATTGATACTCCATTGGTACA
TAAACTTCCTGCCGAAATTAAAAGCGCAATGCAGGTACTGTTGCGGAAAGCTGCGCAGGA
AGGGCACTGCAACTGCGACTTGCCATGCAATCATCGCAACGAGATCCAACAAAGTAAGGA
TTACGTTCGCGTCATTAAGGATGAATAGAGAAATCATCATTGCAGGGAAATACAACAGCG
CATTCATCTTAATGCTCACAGCCATACTGTATGTTGCGGAGATCACCAGCGCAAGGGACT
TCTTCAATTTGGGGCGCTGATGGCACCTGCTGGCCACGATAGCCCCCAAAACCGTGACGA
CCATAAACAAAGTAGTGAAGCAATCATTGAATAACCGTAGCACGTAAATAGAGTGCAGTC
TTTTAGAGAGGCACGCCAAGACCACACACCACGGTGGTAGATGTAAAAGGTAGTAACACG
CCATTTGTAACGCCAGTGTAAGGAGATACAAGTATCTGAAAAACACTTGCCCGCGCTCAA
CGTGGTCCATTCCCTCTGTTAGCCAGTACATCATCTTGTAGATCAAGACGTGGCCTGCTG
GATACACCAGCGGGCCCGTTCCACCACTCACCTGAGAGTAGTCCAGCATGCCATCGAGCT
GAATCATCTCGATCTGCTCCATGTACGCCTTGTAATCGATCTCTGTGTAAGCTACCTTCT
TAATGATAATCTTGCACAGCATGCTTTCGAACAAAATCAAAAGGGGCATAACGATAAGAT
TGGCCCTACAATCGAAGATCACGTAGCGCACACCGTCCTTGAGATCCTGCCACAGATCCA
GCGGAGGTCTGACAAATTGCTTCCTTTGCAGAGACTTTTCACCTTGCGGAGACTGTTCAC
CTTCCATACTACTAGTATCTAACTCTTTCTCTCTCCCATACACACACTATGATACTGTTT
TCACTCCCAACTAGTGTACTGCGTTGTTCTTTAAGTTCGATAGCGAAATTTCTTTAGCTT
GTTTACAGCACCCAGCAACCGCACACAGAATGTGACGGCAAATGCATTTTACATGGAAGG
CTATCTACAAAACAGCAATAAAGAGTCATGTAAGATTGGGAAATCTCTAATGTGACATTC
CATACTTGTTGCAACAATTTTGGGATGCTTCTGCATCGTACGACCCTGTATTTACCTTCC
CTAGCTCATCGCTTCCCAGGGTCCACGTTAATTTTTCAATTTTTTCTTGCGTGTCGAAGA
TTCAGGTCTCGAGAAATTTGTCAAAAATTTTTCACTAGATATTAAGAACTATATACATCG
AATAAGATGCCAGCACAGAAGAGATAGGCAATCAGTTTAGATACTACAGACACTATCCAA
TAGTGCAAAGCAAAAGCAGCATAGAAAAAAGAGTAACCCGTTTCCAGCTTTTTCTCTTTT
TCCCATTCGTTTTTCCTGATCTTTTTTTCTGCATCGTGGCACCTAGAACAAGAGGTACCT
TCCATCCTTCGCTTAATATTTGATACGACTTTTTTGATTTCCATTATTATTATTTGTTAC
TATTATTATTTATCATTTGGGTTTCGGTTTTTTGTAATAATTTTTTTTTTTTTTTTTGGC
TCTATTTCACTAAGACATCGTATATATGCCAGGCCAGATAATCAGCATTCCGTTTTTGTC
GCAGAACGAGGACATGGATAAATACTTGTTGGAGTACCGCAGTTTGAAGCTCCTTCATCA
GTCCAGTAATTCCTTCCAGTCTCACAATGCGCCCTCCCACCAGTCGAACTACCACCCCCA
TTACAATCACATGAAATACAACAACACTGGTAGCTATTACTATTACAACAACAACAATAA
CAGCAGTGTAAACCCACATAACCAAGCTGGTCTACAATCCATTAACAGATCTATTCCATC
GGCCCCGTACGGGGCTTACAACCAGAACAGAGCTAATGACGTACCATATATGAATACCCA
AAAGAAACACCACAGATTTAGCGCTAACAATAATTTGAACCAGCAAAAATACAAGCAATA
TCCCCAGTATACGTCCAATCCAATGGTTACTGCACATCTGAAGCAAACGTACCCTCAACT
GTACTACAATAGCAACGTCAATGCTCACAACAACAACAACAACAACAACAACAGCAACAA
CAACAACAACAACAACAACAATCTTTACAACCAGACGCAGTTCTCCACGAGGTACTTCAA
CTCGAACTCCTCTCCCTCGTTGACTTCTTCCACTTCTAACTCATCCTCTCCATACAACCA
AAGCACCTTCGAATACATTTTGCCGTCAACTTCGGCAGCTTCCACAAATTTATCGTCGTC
ATCATCAAACAACTCTATGCACACCAACCCAACCACCGCAACATCGACATCCGCCGATTT
AATCAATGATTTACCCGTGGGCCCCACGTCCAGTTCGCTTATCTCGGATCTACATTCTCC
ACCAACTGTATCTTTCCTACCAGCAAGCCAAACCCTGCTCATGTCCTCCACCACATCTAG
CTCTATTGGCACCAACATAAACCCACCGCAACATTCACCATCCCCATCGCAAAGGGAGGA
TTTTTCGACGGCACCAGTGAACATGTCTTCGTCCGCATCACTCTTGATGAATGATTCTTC
TTTAGGATGGGGGTCTAACCACATGAACGTATCTTCATCCTCTCAACCAGCATCATCAAG
ACCCTTTGGCATTTGGAATACTGACATGAGCGTTTGGAGTTGAGATGTTTACGTATATTT
TTATGTATATTATTATCATTAGTATTACTATTATTGTTATTATTTATGCACGGTTCCTAT
TTACACGCGGCGTTTATATTTTACCATTGAATATTTAAGATCTCTTTGAATTTTTTCTCG
AATTCGTTTGCCTTTATACGTCCCTGGCTTCGTCTCATTCCTTGTCCAATTAGGAATTTT
AAAGAGGACTTCTTTTTACCAGTAACCAGGTTCCGTATAAAAGTGTCATCTGTGTGCTGT
GCAATGACATCATTACAGAGATCCATCAATTCTTGAGGGTCGACCTGATTAATTGCATGC
AATTCAAATTTCTCGATTAGTTTTGAAAAATCTGGAATAGACAAATCCTGGCAGTTACTC
TGCTTGAAACTTTCCAATATGTGAAACAGTAACATTTTACCACTAGTTGCGGATATAACC
TCTTCATGCAATAACTTCAAAAACTGGGCGAAAACCGGAGGAGGCAAAATTTCTTTTGCT
TTAGCCAATGGAATTTGTAGCTTGTTCAAATCTCCCAAGAATTCATGGATTATCCAATTC
GTAGGTAATTTCGCGTTACTACGTTCACCAGCAAGCTTGGAAAATTCACGGAAGGTGTCT
AAGTAGTACGATCTCAACGCCTCATGATTGTACATATCGTTTTGGTTACTATTATAAGTC
AGAATCTTGGCGTCCTTCAATGATAATTGATAGGGTTTCTTCATAAGCATTCTCATTATA
TCGTCCGGTAATTGGGGCATCAACCCTCTCACACCACTGATAACGTCTGGTGCGAGGTTG
ATATACGGCAATTCTGGATCAGGCATGTACCTGTAATCGATCGTGGTTTCTTTGCTTCTC
AACTTCACCGTTGATGAGCCTGTCCAGCCCCTTGTTTCTGGCTCCATCAGTGAGCTAGTG
TCACCCACAGAAATCAACTCAACTTGCCGCTGATATTCGTACTTGATTGCATTGATGATG
GTACTAGTATTGGGTAAATTCTTCAACTCAACGCGTGCATATTCATTAATTGAGAGGTTA
ACGTCCACTCGCATGGCGCCCGTTTCCAGGTCCCCAGAGGAAATGTGCAAATGACGTACC
AAATTCTGATATTTTTTAATAAACGCTCTAACTTGTTTAATATCACTGAAATCTGGTTTA
GTTACCAATTCGATAAGCGGGACGTTCGACCTATTTAAATCAACCAAAGTAATAACGTCT
TTATCTGTCTCTGTATAGTGTGACTTCCCCGTGTCCTGCTCTATCTGCAACTGTAAGATA
CCGATTTCCTTGGCTGATTCATCGATATCATCCAATTCCTTCGACAGATTGATCTTCCCA
CCCCGAGCAAACGGCCTGTAGTGCTGCGTCAGTTGATAGCCTTGAGGTTGATCTCCATAA
AAATAATGCTTCCTATCAAACTGAGATATGCTATTCACTTGAGAACCCAGTGCCAAGGAT
AGTTTCATGGCAAACAAGATTGCTTCCAGATTCAAAACCGGCTGCGTTCCCGGTAGAGCT
ATGTCATAATAACTAGTATGATGGTTTGGTGCATCCACTAGAGATGTGGCGCTATTCGTT
GATTGTGAAAAAAGCTTGTTTTTGGTGTTCAATTGCGTATGAATCTCCAATCCACACTTC
AATGCATATTCCGGCCTGAAGGGTGCACCGTGACTATGTATGGCTTTGGTTCTGGCCAAA
GAATAAAAACGTGCAAGCTGCAACATATCTAGTTCCTACTCTGGTCTTTTTGGACAGGAA
TGCTAACAATAACACTATTACTAGGTGGTACGACTAAGTACATCACGTCAAGCTTATTAC
TACTATAACTACTATTATCATAACAAAAGGGAAAACTAAACCCTATCTAAACAAGGGTTA
TTTAAATTTTTAACAAGGGCATACAACAAAAAAAATAATAAACCTAAAATCAGAAAGTTA
ATCTTTCAGGGCTTTTGAAAGTGGAATTAACGTCTCTAGTAAACGAGGATTGTTTCCAAT
GAGATTCTAAGACCCAAATATCCTCTTCTTTACTTTGAAATGTTTGCAATGGACCATGAT
TATGGATGTGTTCTTTGTGACACGCTTTCAATGTACTCTATATCGTGTTGCACGAAGGAT
TGTTACTTTATTTGTAAAAAAAAAAACAATTTTTCGAGATGGGACATTAATATTGTAGAA
TTCTGAACATATTAGTGAACAGTTCTTTCGGAGAATTACTGGAACCTAGGATCTGACAAG
CGGACAAAAAAGCAGAGTGCGTTTATTACTTCTCTTTCTAGCGGTTGTTCATGTTTCAAA
GTTTTTTCCACAACAATGGGCCCGCTGCTGCCGGTGAAACGTTTTCAGATAGCAGATCGT
ACCCTTTAACGAATCATCAAGAAGTACCCAGGAATGGACTGAATGAGTTGGCCTCATCTG
CAACCAAGGCGCAACAACAACCTACACACATATTAAACTCATATCCAATTACCGGGTCCA
ACCCACTCATGAGGGCAAGCGCAATGGGGGCGACCTCTGGCAGCATCAATCCTAATATGT
CCAACATGAATGAGCACATTCGTGTTTCCGGGATGGGGACTTCTAAGCCCCTGGACTTAG
CGGGAAAGTACATTGACCATCTACAACATAAAGATAGTAACACTCCCGTACTCGACGAAC
GATCTTATTATAACAGCGGGGTAGATTATAACTTCAGCAGAGAAAAAAACGGCTTAGGAG
CGTTTACTCCATTTGAAAAGCAAGATGTGTTCAACATTCCGGACGAGATTTTGCATGAAT
TTTCCACTTCACAGACAAAAACTGATATGGGTATTTTCCCGGAGTTAAATCGATGTTGGA
TAACTATTGATAATAAACTGATACTCTGGAATATTAACAATGACAATGAGTATCAGGTGG
TAGATGATATGAAGCATACCATTCAAAAAGTCGCCTTGGTAAGACCTAAGCCAAACACCT
TTGTGCCTGCCGTGAAGCATCTACTTTTGATAAGCACGACAATGGAGCTTTTCATGTTTG
CTATTTCCTTAGACAAACCCACCAACGAACTCAGTGTATTCAATACACATCTATCAGTCC
CTGTACAAGGCATTGATGTAATAGACATTGTGTCTCATGAAAGATCGGGTAGAATTTTCT
TCGCAGGCCAAGCCAGTGGCCTGAATATCTGGGAGTTGCACTACTCAGGTTCCGATGACT
GGTTCAATAGTAAATGTAGTAAGGTCTGTCTGACAAAGTCTGCCCTATTAAGTCTTCTAC
CTACTAACATGTTATCGCAGATTCCAGGTGTTGATTTTATTCAGGCTTTGTTCGAAGATA
ATTCTAACGGTAATGGCGGATTTTCTCAAGAGACCATCACGCAACTAACTATTGACCAAC
AAAGAGGAATCATCTATTCATTATCCTCCAAATCCACCATTAGAGCATACGTAATAACAG
AAAAATCACTGGAAGGACCCATGTCAATTGAGCCTGCCTACATCAGTAGGATCATAGGTA
CCACGACGGCAAGGGCAGCACCGATTTTGGGCCCCAAATACCTAAAAATTGTCAAGATAA
GCTCTGTTGCACCAGAAGAAAACAACAATTTGTTTTTAGTTGCTTTAACAGTAGGTGGTG
TGCGTTTGTACTTTAATGGTTCCATGGGCAGATTTAACATCGAAGCTTTGAGGTTAGAAT
CGATCAAGTTCCCCCCTAGTTCTGTAACTCCTGAAGTCATCCAACAAGAATTACTACATC
AACAACAGGAACAGGCGAAGAGAAGCTTTCCTTTCTTTTCAAATCTAATGTCTTCCGAAC
CAGTCCTCTTAAAATTCCAAAAGAAATCATCTGTATTACTAGAGACTACAAAAGCAAGTA
CAATTATTTCCCCAGGCATATTTTTTTCCGCTGTGATCAAATCATCTCAGCAAACTCATC
AACAAGAAAAAAAAGAGAACTCATCTGTTACTGGAACGACCGCTACCGCAGGGTCTAAAA
CTGTCAAACAACAGCCAGTTACTTTACAACATAAGCTTTTCGTTAGTGTTCCAGATTATG
GTATCTTGAAAACACACGGTAAGTACGTTGAAAATGCCACGTTTTTGGAAACTGCGGGCC
CAGTTCAACAAATTATTCCCTTATCGGGGTTGTTTAATGCAACGACAAAGCCACAAGGAT
TTGCTAACGAATTTGCGACACAGTACACATCAGAAACTTTAAGGGTAGCAGTTTTGACGA
GCACTTCTATCGAAATTTATAAATATCGTACTCCTGATGAAATTTTTGAGGATCTAATCG
ATAATCCGCTGCCATTCGTCTTAAATTATGGTGCCGCGGAAGCTTGTTCCACTGCATTGT
TTGTTACTTGCAAATCAAATAAATCTGAAAAATTAAGATCTAATGCCCTGACTTTTTTAA
CTATGGGTATTCCTGGCGTTGTTGACATCAAACCTGTCTACAACCGTTATTCTGTATCTA
CAGTATCCTCTTTATTGTCAAAGCCCACTTTATCAACCGCAACAACTAATCTCCAACAAT
CAATAACTGGCTTTAGTAAACCCTCCCCTGCAAACAAGGAAGATTTTGACTTAGATGACG
TAATATTATCCCCCAGATTTTACGGTATCGCATTATTGATTACCAGACTACTTCGAGATA
TTTGGGGGAGACATGTCTTCATGACTTTTACAGATAATAGGGCGACATCCCATGCTTTCA
TTTCTTCTTCTGATCCAATCACTCCATCTAATAATAACCTAAAAACTGATGAAATTTCAC
AAAATAGGAACATAATATCGAAGGTTTCTATTTCCAAGGATTGTATCGAGTACTATCTAT
CTTCAATTAACATTTTAAATGAATTTTTCATCACTTATGGTGATTCCATTTCCCAAATAT
CAGCTCCCTACGTATTAGCGAACAATTCTAACGGCAGGGTTATTGATAAAACAGAAGAAG
TTGCAAACCAAGCGGAAAGTATAGCGATTAATGCGATGATCAAAATGGTACAGTCCATAA
AGGAAGGTCTATCATTCTTGAACGTTTTATACGAGGAAAGCGAAGTCGAAGGATTCGACA
ACCAATACCTTGGTTTCAAGGATATAATCAGTTTTGTAAGCTTGGACGTCCAAAAAGATT
TAGTCAAACTAGATTTTAAAGATTTATTTGCTCCAAATGACAAAACAAAATCATTAATTA
GAGAAATTTTATTATCCATCATCAATAGGAATATTACCAAAGGTGCGTCGATAGAGTATA
CCGCAACAGCTTTACAAGAACGCTGTGGATCATTCTGCTCTGCAAGTGATATATTAGGAT
TTAGAGCCATTGAACATCTCAGAAGGGCTAAAGAAATTGGCTTGCGTAACTATGATTCTC
TAAACTATCACCTGAAAAATGCTACTGCTTTACTTGAACAAATTGTGGATGATCTTTCTA
TCGAGAAATTGAAAGAAGCTGTATCAATGATGCTGAGTGTAAATTATTACCCAAAATCTA
TTGAATTCTTATTGAATATTGCCAACTCTATGGACAAAGGCAAACTAGCTTGTCAATATG
TGGCAAATGGATTTTTAGAAAATGATGACAGGAAACAATATTACGACAAACGTATCTTAG
TTTATGACCTAGTTTTTGATACTTTAATAAAAGTAGACGAACTTGCCGAAAAAAAACAGT
CATCAAAAACTCAAAACCAAATTTCGATATCGAATGACGATGAAGTGAAACTGAGACAAA
AAAGTTATGAAGTCGCTCTAAAATATAACGATAGATTATTCCACTATCATATGTATGATT
GGCTTGTGTCTCAGAACAGAGAGGAAAAACTATTAGATATTGAAACTCCATTCATACTCC
CTTATTTAATGGAAAAGGCAGGTAGTTCATTGAAGATATCTAATATACTCTGGGTCTATT
ATTCAAGAAGATCTAAATTTTTCGAATCTGCTGAAATTCTTTACCGTTTAGCTACATCGA
ATTTTGACATCACATTGTTTGAAAGAATTGAGTTTCTTTCACGCGCCAATGGTTTTTGCA
ACAGTGTGTCACCATTAAGCCAGAAACAAAGAATTGTACAATTAGCTAGTAGGATCCAAG
ATGCATGTGAAGTTGCTGGTATTCAAGGTGATATATTGTCGCTCGTGTATACAGACGCAA
GAATAGATTCAGCCATTAAAGATGAGCTGATCAAAACTCTAGATGGTAAAATATTGAGCA
CAAGTGAGCTGTTTAATGATTTTGCTGTACCCTTAAGTTACCATGAAATTGCCCTATTCA
TTTTCAAGATAGCAGATTTTAGGGACCATGAAGTAATTATGGCCAAGTGGGATGAGCTAT
TCCAATCTTTGAGGATGGAATTTAATAATACCGGAAAGAAAGAAGATTCAATGAACTTCA
TCAACTTACTGTCTAATGTACTGATTAAAATTGGTAAAAATGTTCAGGATTCTGAATTCA
TTTTCCCCATTTTCGAACTCTTTCCCATTGTCTGTAATTTTTTCTACGAAACACTTCCTA
AAGAACATATTGTATCAGGGTCGATAGTTTCTATATTCATAACAGCGGGTGTTTCTTTCA
ACAAAATGTACTATATTTTAAAAGAACTAATCGAGACATCAGATTCCGATAATTCCGTAT
TTAATAAAGAAATGACCTGGTTAATTCACGAATGGTACAAATCGGACAGGAAATTTAGGG
ACATTATTTCCTACAACGATATCATTCATTTGAAGGAATACAACATTGATAATGATCCAA
TTGAAAAGTACGTTAAGAACAGCGGCAATAATTTGGGGATTTGTTTCTACAAAGAATAAA
AATTCATGTTCGACATATAGATAGCAGGGTAATGTACGTGTATATTTTAATGTAATAAAG
AGGCCTTATTAGACGGTAAAGTTAAGAATATCGAGTGAACTTTTCCTTAAGATAAAGGTA
AATATAGTCGAGTATTTATTTATTATTCTTTTCCACTATACAGTATTTAAAATTCTGTAA
GAAATTGATTCTACATACATAAGACAAACGAACAGGTCAGAGAGAATCAGATTTTTGGTT
AGCAAGAATACATTTTGGAGAAGAAAGACATTAACTCCACCTTACTGTATCATCTTATTT
GCTTTTTCACTCCTTCCTAATATTTTTTTTATTTTATTTTGAATTTCTTCCTATTTCTGA
TGCATTGAACAGATCGTAATCTGTAAGTAAATACCATAACGTGCTCACATTTGTCTCCAA
ATACTGGTGAAATCTTGGCTCCGTTGTGTACAAAACTTCTTAATGAATATATATATATTT
TTCCCTTATTTTATCTTTTTTTTTTCGAATTTTTTATGTAAACATTCTTATACTGGAACA
ATAGATGGCTAATGAGTCCCTATAATTTCGATTTTAGATGTTAACGCTTCATTTCTTTTC
ATATAAAAGACTACCTGCCAAATGTATTTTCTCCTGAGTAAGTGACATACAAAAACCCGT
CCTTATCCTTGTGTTCTTGATATATGGCAGACATCAACGCCGCAGTAGGTGGCAAAGTAT
CATTGACAAAAATGAAGATGGCCTTCTCAGGGGGTAGCATAATTCTCTTTCTTATAACAT
AAACAAATTGCCCTACGGTAAGGTCAGCAGGAACTAGATATTTACGCTTATCAATCTCTG
GAATATCTGACTTTTCAGCTTTTTCGCAAATCACAGGTATCCTATTCTTGAACCTGTCAG
CAATCCTCTCCGACTCCGCCTTCCTTTTTTCAAATGGATATTCAGACTTAAATGTAGACT
TCATGTCTCTAGTAATTATTTTATTATGATTTTCTCAACTTTACAATTATTAGATTCTCT
TATCAATCCCCTCCTCAACCTTTAATGGTTCCCCTTTTTGTATTTCCATATTTATACCAA
ATATTTTTGCCGCCGCCGAAAATAACCGGCCTCCGGGTGATGATATATCATGTGCTATGA
TTTCACGGGTATTATACAACATTATCGGTGGAGACAGTTAGCATTACATGACTCTAACTT
AAACGTAAACTTACACATATACATCTATATCACTTCGAGTAGAGAAAAATTTGTACGTAT
TTATATGAGTTGTTTTCATAATTTGAACACTTTTAATTTGAAAATGGTGTCATTAATAGA
TTGTTCTTCATCACCAATTGGGTCTATCTTTGAGCCGTCATATTTGGCAATGTCGGATCT
ACAGGTCTTGCTTAACATATCAAAATGTTCTTTGACAATGGCTTCAAAGTCGATAGTATC
TTTAACTAATTCGTACTCCACTAAAACATCGTCGGTGGCTTCCAAACCACACTTCTTTCT
CAATTTTTGGATTCTGTTGACCAGCTCTCTTGCGAGACCTTCACTCTTTAGTTCAGAGTA
AATATTTGTATCCATGATGATTAACACGTCTTGGTCGGTTCTGGTTTCTTGTCCAGCTTG
AACAGCAGATTCTGGCAAGCCTCTAATAGCGTTCAAATCACCTTTAACCAGTTCAATACC
AGCGACCTCCAATTTTCCGCTTTCCAAATACTCCCGTACTTGCTCAGAAGTGACTGATGG
TAGGGCATCTTTAACCTTCTTTGCGTCTTTTTTCAACTTCTTACCCAATACAGGCCAATC
AGCAACTGCTTTATACTCAACACCATATTTTGCCTCATCGGAGGTGATAACAACATCACG
AACATTTAATTCCTCGATAATGTAGTTCTTCAAGGCTTCTACATCCTTCAAGTATGATTC
ATCACTGTGAAGGATGACCAAAGTCTTCAATGGAGTTTTTAAGGAAATAGTTTTCTTTTC
ACGAATGTTTCTACCCAAATCGATAACGGATTGCATTCTAGAAACTGCAGTTTCGATGGC
CTCGTCAAAGTATTCTTTCTTGACCACTGGGTAAGATAAGAAATGGACTGATCTTCCGTC
CTTACCGTATTTTGCTAAGACAGCTTCTGGGATGTATTCCTTCAGTCTCAAATAAATGCT
TTCTGACAAAAATGGGGTGAATGGAGCCATGGCACGGACAAATGTGAATAAGGCATCGAA
TAAAGAATTCAATGCTTTCAAACAGTCCTCAACACCGTTTTCACCCTTCAAACGACGACG
ATTAAATCTAATATACCAGTTTGTCAATTCATCAATGAAATTCAAAAGTTTTGGAACGAC
AGTGTATAATTTGTACTGACCCATTTCTTCGTGAATGAATTGTACTAGAGATTGCATAGA
AGCTAAAATCCATCTGTCCATGACATTATCACTTTTCACAGAATCATCATATTGGAAGTC
GATGTTAGACATCTTTTTCAACAAGGCAATTTGACCGTCCAAAAATTTAAAGGAGTTCCA
CCATGGTAGTAAGACCTTTGAAACAACCTCCTTAACACCCTCTTCTTTGAATTTCAAACT
TTCAGCTTTTAAAACAGGTGAGTTTATCAAGTACAATCTTAATGCATCCGCACCATATTT
GTTCAGAACAATGGATGGATCAGGGTAATTTTTCAAGGATTTAGACATCTTTCTACCATC
GGCAGCTAAGACAATACCAGAGACGATGACGTTCTTGTATGGAACAGAGCCAAATAGATG
GGTACCTAAGACAGCTAACGTGTAGAACCAACCTCTTGTTTGATCTAAACCTTCAGAGAT
GAAATTAGCTGGAACTCTTTCGTCAAATTTTTCTGTGTTTTCAAATGGATAATGTTGAGA
AGCATAAGGCATAGAACCAGATTCAAACCAACAATCAAAAACTTCTTCAATTCTCTTTAA
GTCACCCTTACCTTGCTTGGATGGAATTGTCAATTTGTCAATGACATCACGATGCAAGTC
AGTGATGTTACGCACACCGGTCAATTCTTCCAATTCTTTGATAGAACCAACACAGACGAC
CTCCTCAAAATCGTCTGAAACCCATAAAGGAATTGGAGTACCCCAATATCTATTTCTGGA
AACGTTCCAGTCACGGGCATTGGCGATCCAGTTGGCGAACCTCTTTTCCTTGATGGTGTT
AGGAACCCAGTGAGATTTCATCACAGAATCCAACATTTGAGGGACAATGTTTTTAACACG
AACGAACCAAGCTGGAACAGAACGGTATAACAATGGGGTATCGGATCTCCAACAGAATGG
ATAGGAATGGCGAATTTGGGATGCCAATAACAAATTTCCAGTATTAGTTAAGTACTTAAT
AATCAACTTATCAGCGTCCTTGACATAAACACCCTCAAAATCAGGAACGTCTTTCGTGAA
TCTACCAAGGTCATCAATGGCGTTAGGTAACACTGAATCTTCGGATATGACGCCGTTCTT
CAAACAAGCAGCATTATCCTCTTCACCGAAAGCGGGAGCGTTATGAACAATACCAGTACC
GGAATCACTAGTAACATAATCATCTGAAATAACTCTAAAAGCTGTTTCATGGAACTGTTC
AGCGAAATATGGGAACAATGGTTCATACTTCAAACCAACCAAATCAGAACCTTTAATTTT
TTCCACAATCTTATATTTTTCATTCTTAGGCTTCTTATACAAGGTTTTAATCAAAGATTC
TAATAAGATGAAATAACGATCTCTGGTTTCGTCGTAAATCTTTACATATTCGAAATCAGC
GTTAACACATAACGACAAATTGGAAGGTAAAGTCCATGGAGTCGTAGTCCATGCGACCAA
TTGAGTTTTTTCCTGGCCAATAACATTGAAACCAATGGTCACAGCTGGGTCATTGACATC
TTTATAGTTTTGCTGAGCTTCAAAGTTACTTAAGGGAGTGGTTAGCCCAGTAGAATAAGG
CATAACTTTGAATCCACGGTAAACTTGACCTTTTTCATGAAGTTGCTTGAAAGCCCACCA
TGTGGACTCCATAAAGGATGGATACATAGTCTTGTAATCGTTGTCGAAATCAATCCAACG
ACCCAAACGACCAATAGTTTTTCTCCAATCACTGGCATAAGTCATAACAATGGATCTACA
CTCATTGTTGTAGTTTTCAAGACCATACTTGAAGACATCATCTTTACCCGTGATACCTAA
TTTCTTGTCAATGATATGTTCAATTGGAACACCGTGTGTATCCCAACCGAATCTTCTTTC
CACGTGGTGGCCTGTCATGGTAGCGTATCTTGGAACAATATCCTTAATAGTGGAAGCTAG
AATATGACCGTAATGAGGAGTACCGGTGGCAAATGGAGGCCCATCGAAGAAGGAAAACTC
CGGTTTGTCTTTTGTTAATTCTAATGAAGTATGAAAGGCATCTATTTCATCCCAAAGAGA
TAGAACTTTTTCTTCCTCCTTTGGAAATGAGAAGTGTGCGTTACTCTCGGACATATTTCC
TTGGTTTTTTGAAGCTTTTGGCTAAATGTTGTAGGAAGTCGAGTAACATCACTCTAGTTT
AAAGCGCAAAATGATATTTTTCATACTTAAGAGTCATCATTGTTTCGAGATTTCTTGCGT
GCTGCGGAAACTAAAAAAAAAAAAAAAATTTTCGTCATCATGGATAGATTACCCGCCATC
GTATAAAAGGTTAAACATAAAAAGTGGCTAAATAGAACACTATAGAAGAATAATCAATCA
ACCTCTTCCACTGTTGGACCTGTATCTTCTCCACCTCCCGTAGCACCTGAGTTGGGCATG
GATCCGGGGAATCCACCGGATTCGGCCGCTCCAGGACCTGCGCCGGCACCAGCACCGTAA
AATTTGGTCATTATTGGATTGGCAATGCCTTCCAACTCCTTTTGTCTATCCTTATATTCG
TCCGTAGAGGCTGCCTGCGATGCATCTAACCAGTCAATGGTTTCCTGAGACGCTGTTTCT
AATCTCTTTGCATCATCTTCACCTACTTTCTCTTTGAAACTTGCTTCGTTTATGGTATTC
TTCAAAGTAAATGCATATGATTCAAGCTGATTCTTAGCCTGAACTCGTTCTGCCTCTCTT
TCATCGTCAGCCCTATATTTTTCAGCTTCAGAAACCATCCTATCAATATCATCCTTCGAG
AGCCTACCTTTATCGTTAGTGATCGTGATTTTGTTACTCTTACCAGTACCTTTTTCCAAA
GCAGACACATTAAGAATACCATTAGCGTCGATATCAAAGGTAACATCAATTTGAGGCACA
CCTCTGGGAGCAGGCGGAATGCCACTTAATTCGAATTTACCAAGTAAGTTATTATCCTTT
GTTCTTGTTCTTTCACCTTCAAAGACTTGAATTAAAACACCAGGTTGATTATCTGCATAG
GTAGAGAAGGTTTCCGATTTCTTTGTTGGAATCGTTGAGTTTCTAGGAATTAGCTTAGTC
ATTATGCCGCCTGCAGTTTCAATTCCTAGGGACAATGGCGCAACATCCAATAATAGTAAA
TCTTGTGTCTTTGTTGATTGATCGCCGGTTAAAATGGCAGCTTGAACGGCTGCGCCATAA
GCAACAGCCTCATCCGGGTTGATAGAACGATTAGGCTCTTTGCCATTGAAGAAGTCAGAA
ACTAATTTCTGAATCTTTGGGATTCTGGTAGATCCACCGACTAACACAATCTCATCAATT
TGGGACTTGTCCAGCTTCGAATCTTTAAGAACCTTTTCCACTGGTTCCAATGTGGATCTG
AACAAATCAGCACATAGCTCTTCAAACCTTGCCCTTGTTAACGAAGTGTAGAAATCCATA
CCTTCAAATAAAGAATCGATCTCGATCGAGGTTTGAGATGAGGAAGAAAGCTCTCTCTTA
GCTCTTTCTGCCGCAGTTCTCAATCTTCTTAACGATCTTTGATTATTAGAGATGTCCTTT
TTCGTTTTCCTTTTGAATTCAGTGGCTAAATGGTTCACCAACCTATTATCAAAATCTTCA
CCACCTAAATGAGTGTCTCCTGCGGTAGCCTTAACCTCAAAAACACCCTCGTCAATCGAA
AGTAAAGAGACGTCAAAAGTACCACCACCCAAATCAAAAATCAGGACATTGTGCTCAGCC
CTGCCTTTCTTATCCAAACCATAAGCAATTGCTGCTGCAGTGGGTTCATTGATAATACGT
AAAACGTTCATCCCTGCAATAGTTCCTGCATCCTTAGTGGCTTGTCTTTGAGAATCATTG
AAATATGCAGGAACAGTTACAACAGCATCATTGACCGTAGTTCCCAAATAGTTCTCAGCA
GTTTCCTTCATTTTGCTTAAAACCATGGAAGAAATTTCCTCAGGCGTAAATGTTTTCGTT
TCACCCTTATATTCTACTTGCACTACAGGTTTACCATCTCTGGATATAACTTTGAAAGGG
AAGTGCTTGGCATCTGTCGTCACTTCAGGATCATCAAATTTACGACCAATTAACCGCTTT
GCATCAAAAACTGTATTATGAGGATTGATTGCAGCTTGATTTTTGGCGGCGTCACCAATT
AATCTTTCGGTGTCTGTGAAAGCCACATACGATGGAGTGGTCCTATTACCTTGATCATTT
GCAATTATCTCTACCCTATCATTGAAAAAATGAGCAACACACGAGTAAGTCGTTCCCAAA
TCAATACCAACTGCTCTAGACATTTTTCTTTGTAGCGTTGAGTACCTGTTCTATCCGTTT
AGTGACAAACATTGACATACAAGAATGTTTATACTACCAATTTCAGTTACTTTATATACC
CTTCCATTCGTTTCCAATTGTGCAATATGATACATCCCTTAACCATCTTCTGGTCACCCT
TGTGGCTGCTTCTGTAATATTCTATAACTTTCCACAGCGATCCCTAATTAAGGGCACCCA
TAACCTCCATAGGCATCAAGTCAAATACGTTTGGTGATAGCGCCGCACGATGATCGTTAT
GGCCTTTGGTAATAGAGACCGCCAACAATGGTAGGGTTGTGCTCATCATCCTCGTCATCC
CTTTCTTCATCACTGATACCGTAAATAAGAGCGTCGTCTTCATTGTCTTTACCAAGCAAT
TCTGGATATTTGTTTTCCATTATCTTTTCTGTGTTGTGTAGGGAGTTTTTTTGAAATGAC
GAATACAGACAAATATTCCAAACTCGTTCATTCAACAAGATGTCTGAGTATTGTTCAGGC
AATGTCTTTATCTGATAATATAAGATTTCGTCTAATTTATCGAGCATATGTTTAGGCACT
GTAGCGCTTGAACATATCAGTTCGATCATAGCGTGCCATTGCAAACTCGACCCGTAGTTA
CCAAAAAACATGGCATTTAAGAACGCAAACTGCAACTCCCCAAAATAATTACTTGAATTT
TTAAAAATTCCTTGTAGCATTACAGTGTTCAAGTAGTAAGACTTGTCTAAAAAATCCTCC
ATTTCATGGCCAGGCCTTATGGCTTCTCTAGATTTGAAGTTTATTACTGTATAGTTTAAA
GAATGTGCAGGATCATCTTCATTCTTGGTTTCCATTTTAGAACCTGCTTTTTGCAAGCTG
GATTTTAGCAGCTCATTTTCTTGAACTGTGGTCATCGAAGAATCTACGTAAGAGAACTGG
TTTTCATCTTTCCTTACTATCTTTCGGATTTTATCCATCTGCACAAACTCGGTAAGATTG
TACCAGGTATCATCTTCGTCAATTTTCGGATAAGAAACCATCATCTGCCGTTCCTTGAAG
TTGTGAACAATATTCTCGAATTTTGCGCCATCCCTTTCTTCCATCATTTTGTAAAGGCCA
TCTTTAGGATCATACTGAATGTAAAAGTTTCCCATTCTACAGTCAAACCAGTAGCCATAC
CTCATGCTGGAATTATCTGCATGCTGAAAATGAATGACATGAACGTGTCCAATGGGGATG
TCCTTGATTCCGTGAAATGGCTGATTCTCCTTGACATTAAAGGAATACTGATCGATCCCT
ATAGTTACCTCAATCGGAGCAGATGTGAATGGTACAGTATTCATTGCAGGCTTCCGATAT
TTTGTTTTTTAGCCCCATGTCCCAGCGATAAGGAGGATCTTTGGTGTCCATTCATCTCAT
TAAACCCTAAACCATTGAAATATTCGTGTTCGTGCGTCGCGATTTTTTCCGCTTTCAAGA
TGTGTCCTTTCTTCATCTCTTGGTTCTTATAAAAGGGCGCCGCAAACCCCTCCTAATTAC
TTTTTCCTTTTCACATCCCATGGGTTTTATCTTATACCAAATGTTTACCATTCTGAATCG
CATAGCCAACAAGTAACCACAGCTGCAATTGTGAAAAAAATGGATAGGTGTGGTCACCCA
ACTGTTTTTTTCTCTTTTTCTTTTTTTTTTTTGAAATGGCTAGACAGTGCTTTTGCTGGT
AAAAGAAAAACTCTTGTTTCAATTTAACATGATGAAAAAATATATTAACACAGACCTGTA
CTGAACTTTTCGAAGTTTTGCAGATAACAATATTGCTTTTTTTCTCTGACTTTAACTAAT
CGCTCTTATTTCTGTATATACTATGACCTTGCAAACCTTGAAATGCAAAATTCGTATTCT
CTGCTAAATTGAAAAATTTAGAGCATGAAGTGTGTTTTCCAGCAGACACCGCCTGTGAAA
AAGATGGTAAAATGATATGATAATTAAACACACATAATAATAGCATATATGATATATAAG
ACTATATGAAGAGATGAGGAGAAGAAAAAATTGGTAGTATTTTCATTTCATCTATTTCTT
AGCAGTCAATCTTCTTAGGTAGAAAGCTAATTCTTCACCTTCCAAGATGTAACCNNNNNN
NNNNNNNNNNNNNNNNNNNNNNNNNNNNNNNNNNNNNNNNNNNNNNNNNNNNNNNNNNNN
NNNNNNNNNNNNNNNNNNNNNNNNNNNNNNNNNNNNNNNNNNNNNNNNNNNNNNNNNNNN
NNNNNNNNNNNNNNNNNNNNNNNNNNNNNNNNNNNNNNNNNNNNNNNNNNNNNNNNNNNN
NNNNNNNNNNNNNNNNNNNNNNNNNNNNNNNNNNNNNNNNNNNNNNNNNNNNNNNNNNNN
NNNNNNNNNNNNNNNNNNNNNNNNNNNNNNNNNNNNNNNNNNNNNNNNNNNNNNNNNNNN
NNNNNNNNNNNNNNNNNNNNNNNNNNNNNNNNNNNNNNNNNNNNNNNNNNNNNNNNNNNN
NNNNNNNNNNNNNNNNNNNNNNNNNNNNNNNNNNNNNNNNNNNNNNNNNNNNNNNNNNNN
NNNNNNNNNNNNNNNNNNNNNNNNNNNNNNNNNNNNNNNNNNNNNNNNNNNNNNNNNNNN
NNNNNNNNNNNNNNNNNNNNNNNNNNNNNNNNNNNNNNNNNNNNNNNNNNNNNNNNNNNN
NNNNNNNNNNNNNNNNNNNNNNNNNNNNNNNNNNNNNNNNNNNNNNNNNNNNNNNNNNNN
NNNNNNNNNNNNNNNNNNNNNNNNNNNNNNNNNNNNNNNNNNNNNNNNNNNNNNNNNNNN
NNNNNNNNNNNNNNNNNNNNNNNNNNNNNNNNNNNNNNNNNNNNNNNNNNNNNNNNNNNN
NNNNNNNNNNNNNNNNNNNNNNNNNNNNNNNNNNNNNNNNNNNNNNNNNNNNNNNNNNNN
NNNNNNNNNNNNNNNNNNNNNNNNNNNNNNNNNNNNNNNNNNNNNNNNNNNNNNNNNNNN
NNNNNNNNNNNNNNNNNNNNNNNNNNNNNNNNNNNNNNNNNNNNNNNNNNNNNNNNNNNN
NNNNNNNNNNNNNNNNNNNNNNNNNNNNNNNNNNNNNNNNNNNNNNNNNNNNNNNNNNNN
NNNNNNNNNNNNNNNNNNNNNNNNNNNNNNNNNNNNNNNNNNNGGTAAACAACACCAGCA
ATTCTGGTCTTCTTGGAGATACCTTCAGAAGCCCAAGAAAAGTTACCGGTTTCAATTCTT
AGAGCTCTGTATTTCTTGTTACCACCTCTAGTTCTGACAGAGTGGATTCTCTTAGCACCA
ATTTTTGTGTTGGCTGGTTGACGACCTAATTCGAACTTTCTCTTCTTTCTGAATTGAGCA
CGTTTAGCACCAGTGGCTGATCTTTTGTGACGAGAATCACGAGAAATACCCATTTTTACA
CTATTTTAATTTTTGTTAATTTGTTAGTAAAACTATTTTCTTGTAATAACGCATCGAGAT
AGAAGGCGAAAGTATGTGATATTTTCACAAAGTATTCCAAATGTATTTCAATTGCTCGTA
TTCATCCTAGACCCATTTTTCCTTGCATCGATAATTCTTCGGTCTTTTAAATTGCAGTAC
CTCCTCAACGCTAGTTAATTCTCATATATTAACCTCAAATGTTAGGTTGCATGATTTCAT
TGCTCAGGATGCATGCGTTAGAATTTATGATCTAAATATCCATCTTGCTAGCAGTCTTGA
CCGCCACAGGTTTTTAGGTTTCTCCTTCTACTTTCTCATTTGCTGGGTATCAGAACATAC
GTTTTATCGTGGTGTGTTCAGTCTCCTTTCAATGTTTGGTAAGTAAAAATCATAAATAAT
AGCTTTTAACAATATGGTGGTAAGTTTCACCATTGAGTACAATACGATGGGCATTGGAAT
GCTGGCAAGCTCGTCCCGCAGAATGGAAGTTTCAATGTCCACGCTGAAGCAGGACCCTTT
CCTGCCTAAAGCAATGCCCGTTCGTAAGGAAGTTAGGCGGACTGTCCCTCCCCTCTACCC
GAGAAATTTCTCCTTCCTCTCTGCCCACTTGGGCTGGGCAAGTCGGTATCAGGCAGAATC
TCTGTTCGGGCGAATTGTCGACCGATTGTGCTCCGCGAACTTTTAGTAATAGACAAAAAT
ATTGAAATATTGTATGGGTTTAAATTTCTTGGATGTCAAGATGTTTCGCAGTAAAAACTT
TCACTCTAATGACGATAAAATATGACTTTGGTTATTATGCCCAGAAGTCGGTAGCTAAAG
ATAAACGACAGGCTTCAAGTAAACTTTTAAGCGGTGCATAGATTATGTACATTAAGGATT
CACTCAGCCTAACCCTTTTTATTGAGTACATTGCTCAAGGCGATACAAGTCCATGAATTT
ACTGCTTGAAATGGAATTACTCACAACGAGGGGAGAACCAATAATATCCGTATTCGAATT
TCTCTGTAGGTCAAGTTCAGTTTCTCTTAAGGGGGAAGTTTTGTTGTCAAGTCGAAGACC
TACCTTAACTTAGCCTTTTCTTGCGTCCAGTTGACCTTGATTGTAAAACCTTCTATCGCC
ATTATTCATCCTATTTTATGATTTTCAGACATCGCCCCAGCTATACACAAAGAGAAGTAT
AAAGGAAGGGATGCACGATTATACTTAAGTTGAAGGGTACACTACGCAGGAAGTAAAGAC
GTAACAATCAAAAGAAAGTTAAACTAGCATAGAAAGATGGCAGAGAAAATCTTGGAAAAT
AAAGACCCTAAACTAGAAGCGATGACAGTGGACCATGAAGTTTCAGCGCCGAAGCCAATC
CCCGTGGATGAACCTACGCTGACTAGAGTCGCCAGACCGTTAAGACATGTAAGACATATT
CCCGTTAAGTCATTAGTTTTTCATTCTAAACACGGTCCCATTACTTTTTCATATGAGAAC
AAAATTAAGTTGCCCATAAGTAAAAACAAACTGGTAGTTCAAGTGAACTATGTAGGTTTG
AACCCTGTTGATATGAAGATTAGGAATGGTTACACCAAGCCTATTTATGGTGAAGCCGGC
ATTGGAAGAGAATACAGCGGAGTGATAACACATGTCGGTGATAATTTGACAAATAGATGG
AACGTGGGTGACGATGTGTACGGCATTTACTATCATCCCAAGTTAGCCATTGGCGCCCTG
CAAAGTTCGTTGCTCATTGATCCGCGTGTCGATCCTATTTTAATGCGACCCAAAAATACT
CTATCACCAGAAAAGGCAGCAGGCTCCTTATTCTGTTTAGGAACAGCGCTTAATCTGTTA
GCTCAACTAAAGGAGAAGGATCAATTGAATACAGAATCTAATGTTTTAATAAACGGTGGT
ACAAGCTCTGTAGGGATGTTTGCTATCCAGTTATTGAAGCGTTACTATAAAGTTTCTAAA
AAGCTAGTAGTGGTAACGTCAGGTAATGGTGCAGCAGTCCTGTCAGAACATTTCCCGGAT
TTGAAAGATGAAATCATTTTCATAAATTATCTGTCATGTAGGGGAAAATCTAGTAAACCA
CTCAGACGTATGTTGGATACCGGTAAAGTTGTAGATTATGATGATTTTAATACTCTCAAA
GAAACCGAAGATTATACTCAGGGTAAATTTAATGTCGTGTTGGACTTCATCGGTGGTTAT
GATATCTTGAGTCACTCGAGTTCTTTAATTCACGCTAAAGGTGCTTATATTACAACAGTT
GGTGATTATGTTGGAAATTATAAGAAAGACGTCTTTGATTCTTGGGATAACCCTAGCGCC
AATGCAAGAAAAATGTTTGGATCAATGTTATGGTCATACGATTATTCTCATTTTTACTTT
GACCCCAATATCAAGATTATCCCCAAGAAGAATGATTGGATACATGAATGCGGCAAGCTG
CTAAATGAGGGAGTCGTAGATTGCGTTGTTGATAAGGTTTATTCCTGGAAAAATTTCAAG
GAAGCATTTTCCTACATGGCTACACAACGTGCTCAAGGTAAGCTTATAATGAAAGTTGAA
GGTTTTTGAAAATGGGAGTTTCTGTCTCCCTAGGTTTCACCTCATTTTTATTGAGGTTTC
TTGGTCAATACATACTCAAAAATATAATTAATAATTCACAATGTTCATAATAAAAAGATC
CGTTTTGTCTATATAATACTATTGATTTCTATTCTGTGTTGTCAAAATTTATCTAAAGTT
TAGTTCATTTAATTGCTTCATTTCATAAAAAGGCCAACCAAAAACAAAAAAATAGCGATA
CCAATATAAACCATTGAAGAACTACCATTAGGTTCTTTGCCATCTTTCTTGGAATTATTT
TCTGATTGTCTCAACGCTTGTTCAGCGCGTATTCTGTCTTCAGGGTCTAGAATTTCCTCC
AACGAGATGACTTTTTCCTTCGCAGCCTTTGTAAAAGGGTCTTCTGTTTCATCACCTGTA
TTTGCCGCATCCCCCTCATCCAATTTTCTCTTTTCTAATGTCTCTACATTTTCCTGTACA
ACTTCCGGAAAAATCAATTTGAATCTAACATTTTGAAAAGTGTTATAACTTATGGAATTT
CTTGCTAATGTCTTCTTCTGATGGTCTGATGTTGTAATTGATCCTGTCGTGGCTTCATCA
CTGGTCATGAAACTTAGTAACCCGTTCAAAATGGTTGAGACAGACCAGCCAGGATTCCAA
GTATCAGGGTGGTAATCACTCATAGAAAGGCATAATCGTGTGTTGGGCTTGAAACGTCCA
TTCGGTGTTATCATTCTGATAGCCGGTGGTTTGTATGGATAATCAGACGGGAAAGTTAAA
GTACCGTGATATTGACCGCCCTTGTAAGGAGTATCCGCAGGTCCTGTGATAATATAGTGC
CACTCTAAAATATTATCTTCGTTGGGGCGAGCAAGAATATATGGTGGAGGGTTTTCCACC
ATCAACTTGTACTCTTTCGTCAATCTCTTGTGAGCCTGCTTTGTAGCCATTACTATTGTA
CGTACTTTGTTTGCAATTTGCGAATGCGGTTTTAGTTAATATTTAAAGTCTTTTCTGCGA
TATGCGATGGTAGTCTTCTTTATGACGGCTCCTAAAGTGTGATAATCGGAAAGTTCCTTT
CTGTTCTCTGCAATCGATTTCGGCTTTTTCTGAACACAAATAACCAAAATTTCCTTATTT
TATTGGGGAGGCTATCCTAATTGTAAAGTGCAATATTGCTGTGGAAGGATATCGACTCAA
GCGACCAGTGGAATAGGATAGCGAGTTGGCTAGTTTAGCTCTCTCCGACATTGTTGCTAT
TGAACAGATACGGTATGCCCGTGTATTTATCCTCCTACCAAATCGCGCAGCAAAATGGTT
AAGCACGTGACTATTTTTCAACAATGAAAAAATTTTGAACAATAGATGATATGAGGAGGC
ATCGAGGGATTGCTAAGAAGAGGATATTCCTCATCATCCAAAGACTATCTTGTCGTAAGT
TTCGTTGAATATGTCTACAAACAGTATTAAGTTGTTAGCTGGTAACTCACATCCTGGGCT
TGCTGAGCTTATTTCCCAAAGGCTTGGTGTACCGTTATCTAAAGTGGGGGTATATCAGTA
TTCAAATAAAGAGACGTCTGTTACAATAGGGTAAAGCATTCGTGATGAAGACGTATATAT
CATCCAAACTGGTTACGGGGAACATGAAATCAACGATTTCTTAATGGAATTACTTATCTT
AATTCACGCTTGTAAGACGGCATCAGTCAGAAGAATTACGGCAGTAATACCAAATTTCCC
TTATGCTAGACAAGATAAGAAGGATAAATCGCGGGCGCCCATCACTGCGAAGCTGATTGC
CAATCTTTTGGAAACTGCGGGTTGTGATCATGTTATTACTATGGATCTCCATGCTTCACA
AATTCAAGGGTTTTTTCATATCCCGGTTGATAATTTATACGGTGAACCAAGTGTGTTGAA
TTACATAAGGACCAAAACAGATTTCAATAATGCGATACTGGTATCGCCTGATGCTGGTGG
TGCGAAAAGGGTGGCTTCTTTAGCGGACAAGCTGGATATGAATTTTGCCTTGATTCATAA
GGAGAGGCAAAAAGCTAATGAAGTTTCGCGAATGCTGCTTGTCGGTGATGTTGCTGGTAA
GTCATGCTTGTTGATTGACGATATGGCTGACACGTGTGGTACGCTGGTGAAAGCTTGTGA
CACATTAATGGATCACGGTGCTAAGGAGGTTATCGCTATTGTCACACATGGTATATTTTC
TGGCTCAGCTAGGGAGAAGTTAATAAATAGTAGGTTATCAAGAATTGTTTGCACCAACAC
GGTACCTGTTGATTTGGATTTGGACATTGTCGATCAGGTGGATATCAGCCCTACGATTGC
AGAAGCTATCAGAAGATTGCATAATGGAGAATCAGTCTCATATTTATTTACACATGCGCC
TGTTTAAAGAAGAGGTATAAACGAATATATTTGTATAATTGTACTAACAGATATTTTGAA
AAAAATGCGTATATCTATTCAGTATTAGCGCTTATGCTGCCACCAACATTCTTCATCTGG
TCTCTATGAGATTTTCATTAAAGCTTAATCTTTTCTGATTTACCGCCCTTGCTTTTGGAA
AATATGTGAAATTTTATTGTGCTCTAAAAAAAAAAAAAAGTTATTACAGTAGGTGAAATG
AAATACAACTAAATTCGAAAGATCAGGAACAATAGAAAGAAACGTGGAAATTATTTAAAA
AAGGAAGAAAAAATGGTACACTAATATTGATACTTTTAGAACAGATGGGTCTCAACTATA
TGATGTATCGAAACAATCCCAATTTATTTGATGAAGCTCAATATTCTCGATTTTCTTTTT
TGCTTATTGCGTTTTTTATCATTTAATGGCGTCTTGGTTTCTGCAGTCTTAACTTCAGGT
ATATTCCCCAAGGTCTTTTTGCGTTCAATATTTGCAGCTGCCCTCAATTTACGATCCCTT
AACCAATCATCGCATTTTATTAACTGTTCAATGTTATTGTCAGTCTGCATTTGATCTTGA
CTAGAAGTGTCTATATTTTCATTTTGATTTTCGGTCTTATCAGCCTGTGTTTCTTTATAG
AATAAAACGTAGGCTGTAGTTTGATCACCTGGATGACCTGTGAATTGTAACACAGTTTCT
TCTTTTATGGATTCCACCGTTTCGTCATCATACAAAAGCCACCCAAACTTTTCGTTCCTG
CAAATGCATACGTAATGACCATGCTGTGGACCGCTCCCCATATGGATGACGACGCCGCTT
AGTTCATATTTTTTATATACTGATGTATTAAAAGTGGAAGAAACATCCAAAGTTAGTGGA
TAGAGTATTTTGTTAAAAAGTTTGATGTTTGACTTTTGCTCCTCTGAATACTTGAATCTT
TTTAGGTGCAATGACAGAATATGGGGCAGTTGCTTCAGTCCGACCATACGTTCTGCTTCT
TGTAAACCATAACATTTGTTACAATAAAATTTGTTAACCCCGTTCAACATCTCACGCTGA
TGATAGCTTTTTAACATCTTCTGGATATCAGTCTCTTCATCACCCTGTACTTCTATTGGA
AAGTCTAAAAATGGTTCGTCCCTTGAGGTGATATTGTCACAAGTTAAACATTTGATCCTA
TTCGTCAGTGTACCTTTGAATAAATCCGTTATAAAGTTGTCGTTGCTGTTGTCTGTCTTT
TGTGGTCCGAATCTCACTCTGGGATTATTGCGTTGAATATATTCACTGAAATCATTTAAT
AAAAAGTTTAAAAATTCATGGGCATCTTGTTGCACCATAGTGTTGAACAAGACGTTTTCT
TTTTTTAAAATTTTGACAAACTCTGTAGGTGAAACGATACCGGTTAGCGACAAGTTTTCA
GTAATAGATTCAAATATATCTTTTAGTCCATTGTAAAGTGTAGCTTCCTCGGTTGGATAA
AGTAAATGATCTACGTTAAGAACGGGGCCTCTAATTAAGGCGGCTTTTTTTCTTTGTTCA
CTTGTTGGAAACGTATTCTCTTTATTATTATTAGAATTGTTGACAGCATCGTTACAGCTC
TCAGGGTTAACAAGGACATCATCATCCACTGATGTAATCCTACTGCCTTGTGAATCACAC
TGGCAATGCGAATTTGCTTGACAATCTGTAGTTGAAGCTTTTGATAAGGAATCGCTTTGC
TTTAAAAGCGATCTTCCCACAATAATTTTTTTACAGCCTTCGTGAAGCTTCTCTGTTAAT
GTATCAGAGGCCATTACAACTGTGTGAACAGGCTGAGGCCGTTCCATCTCATTGTTATCA
TCTTTCTTTGCAGAATCTTTATAGTTCGATTTACCTTTTCCAAAACCCATAAACGAGTTC
CTTTTTCTTTCAAAATTATTCTGTTTTTCTTGAGTAGAAGAAGAGGAGTTATCTTGATCA
CTCTGCTGAAGGTGGTGGTGGTTATGTGCATCTTCATTATCATTGCTTTGGTACCCCGTA
TTAGAATTTCCGCTATTAGTAGATGTTTCAAAACTTTCATTAGTGAATACCCTTATTTTT
GAACCCTTCAAATCACTTTTGCGTATTCTGTTTACTGCGGCTACTCTTTCAGGATATCGC
AGCACATTACACCTAAATTCGGGGATATTATAAAGGCATTGTAGAACGGAGTTGCAGTAG
CAAGTATTCCCAAAATTTTCATAACCGAACACTTTATTGGAACCATCCCCATATGGCATT
AAATCTGTCATAGTAGTAAATAGTATGGAGGACTCTGTATCGAACGCACGATCTTCATAT
GTAGTCGAGGAATCGTACTCTCTTTCATCTGAAGTACTTGCCATATTATGGTAATGCTCA
TGGTAATGTTTATTTCCTGCAAGGTTATCCGTTTGACTACTAAACTTGCTTCTTCTTTCA
TGGCTCGCAAGATTAGAAGGTCTGCTTGATGTACTACTCTTAGCACTTGGTGATTTCGCT
ATGGAGGGATCTCCAGAACCTTTCGTTTTCTTCAGGCTAGTTGCTTTCCGATTAATTTCG
TCATTATCTTGAGTGTTCTTCTCCGGGTGTAACTTTTTCCTATTCACAGATAACCATCTT
TTTATCATTTTTCATATGGAAGACTCGTTGCCTTTGGTAAATGTTTTAATTTTCTGTTTA
TTACTGATAATGCAAATACTTTTTTAAGGATCGAGCTAAGGTTTTCGACACATTCAAGCT
TGTTCAAGCGAAAGGTTGAGTTCGCCCCTAGAAGTTTAATAAAATCGGAAGTTCCAAATA
CAGCTTCGATGGACCTTATTGAATGCAAGAGAAACGTTTTCTTGTGGGGGGGGCGTCATA
TCGTTTGGAAAGGAACAGAAGTGCAACTTTTTCAACCCATAATAGAAATCGCGCATTGAC
ATTAATAAACGCGATTTCCGGGGTAAAAACCGCATATAAAGTATATATGGCGTACAGGAG
CCCAATTGCTTTTTCTTTTGCTGAAGGACAATTGAGATACGACAGCGTGATGCTTTGTTG
GAAGGTGGCTCCTAACACCATACGGTGTATGTATGGTGTCAAAAAAGTACTCCGATACGG
GGAGTCGAACCCCGGTCTCCACGGTGAAAGCGTGATGTGATAGCCGTTACACTATATCGG
ATTACAATACACGTATGTGTTGCATCTCAAAATGGGATACGTCAGTATGACAATACCCAC
CTAAAATATTCATAAAACACATATTGAGATGTTGGTTAATTTTAAAATAATTGTTGGGAT
TGATTGTTCGTAAATGCTATAATATTGCGTATACAGAATATACTAGAAGTCTCCTCGAGA
TAGGGAATCCATAAAAGGAGAATCGATAAATCTACATATTGTTGTTATTCTTTCTTCTTC
CATTTTATATGTTCTCGTTTAATATTCTATCACGATCTGAGTCCCTGCATTTCAACCTCC
ATTAAATTTGATGAGTGTTTCTCAATTTTTTATGTCATCTTCCCGCACCGTATATGATTG
TATACCAGTATTATGAATATCAGTACACTAGTTGATAGATGATGGCTGATTCCTATTCCA
AGAAAGTTTTACTTAAACTTTTATATTTCTACTATAGGTTCTTGTCTGAGTAACGGAAAC
CACCTGCTCTAACAAAATCTTAGTTTAGTTCAAGGTTACACTTGCTGCATAATCGTTGTG
GTTCTGGAGTTTTATCCCGCAACGAAATTCTAATCTATGGTTGGAATTTAATTATGGAAA
AACTCATTTATGATGCTAAGCAAACAGGTCTTAGTGTGAGGGGGCATTGATCTTGAAAAA
TAGTCAATCCTACCCGCAGAAATTACTCCACAAAGGTCTGAAAGTAGACGCTGTTGCGTA
TTTGGTCAATGAGGTGTATACTTCTTATCTTGAGCGGTATATAATAGCTTTATATCCCGA
TACTTGAATTATGCTTATGTAAGAAGAAGTGACACTGATTGCTCATTTGTGCCATTATAA
TGTAAGCGTTTGTTTTACAAGTGTTAGTGAAGGTATAATGTATGTTATTATTTTTTTTCT
TCATTGTTTCTTTTCAAAAGGATGAGATTTTGTTTTAAAATATTACAGATTTCCGCACCA
AAAAGTAAATATTATTAAAAAGACACATTAATTTCAACGCTGGGAAAGTAAATAAGTATA
ACGTCGTATATGATAGAACTAAGAAAGGCCGTGACTTAAATGGTCCATAGCCAATGCCAC
GGCATTAACGATAGTAGTGCTCAAATACATCTCAAAATGCAGCATATAGGATCTGCGCTA
AATAACAGAAGAAGTTTAGTCAGGTTTATTTATTCGATATACAGCAAAGTAACAAATAGT
AACGAAAGGTGTGAGGATCAGTCTATTTTTGATCAAACAAACTTCTAAAGTTAATCGAAC
TTCCACAGTTTGTGAAAAAAAAAACAACAAAATAAAAGGAAAACGAAGTTTGTATTTATC
TATTAAATCAACTTTTTGGCTGCCACAGCTTCATGGGAGGTTTTATGATATTTCTGTGCC
GAAGGAGGATGTCCTCGCGAAACAAACCCTCCACTTCTGCGAGCGTCTTCTAGTATTCTT
GCCGATTCAGTATGCCCTAAAGCCGCCGCCTTCTCATACAATGCCATAGCATAATCTGGA
TCCGAAATGATAAGATCTTTATATCCCGTCATATAAATATTGGCTAATTCAAAAGGAGCA
CCACAAACAAAGCTGCTAGCCATAGATGTAGCCCTTCGCAACCATCTATAACCATCCATT
TTGGTTAGAATATCATCTGGAAGACCCATCAAACCATGATACGAATATACTCCTAATTTG
TACATTGCTGCAGGATGGTTCTTAGTTGCAGCAAAAGTCAAAAAGTTAACCGCCCTCGGT
GCATTTCTGGTTACACCCAAGCCGCACTCATAGCAAATGGCAGTTCTGTAAACACTTTCG
ATGTGCAATCTTTTGGCTGCAGCGGAGAATAAAAGAAATGCTCTTCTATTCTTTATTTTA
CCGAAAACTCCAGAGGAGTAGGCGTCACCTAGAAGGTACTGTGCATCAGGGTATCCAACG
GCACTTAGTTTCTTCAAAATAACTTTGGCATCGTTCACTAAATATTCCTTTAAAGAATCT
ACAGTGAAGCTATTGCTTTCATCCTCCAGTTCCTTAACAAGTTCGTGTAGTTTTTCGGTA
TCCAACCCTACCCTTAAAATGTATTGTGCATACTGAAAATTAGAATATATGTCTTGAGTT
TTCTTAACTACCTCCCCGTACATTTCAATGGTTTTCCATCTTGGTAGCAAGCTCTTCTTG
TTTTCCTTGCCAAGGTGAAATTTGGCCACATTATGTGATTCTGATGCAGTCACCTCATTT
GTGAGGCAAAGACTATTGTAAACGTTAAAATCTAGTGACACATGTCTAGGAAGTGAAATG
GAACTCGTGCTTCTATTGATATCGTTTGAAGAGCCTGATCCGCTTGGATTATTCAAAAAG
TCCAAATCATTCGATTGACTAAAAGACAGAGCGACAGATTCATTCTGAGAGGGAGGGGGC
TCAGCGAAGTCGTGAAACTCGGAATTACCGTCTGCCGATGTGCCATTTAAAATTTCGGAT
GAAATTTCAGAAGCAATTTCAATTTCACAAGAACCTTGTGATTTTTCCTTCAGTGAGGAA
GAAGCATCGTCCTCAACGTCGTTCTCAAACTCGTCCTGCTCAGGAAGAATCTTTCTTGTG
GGAAAAGAGTTATATTTTTCAATCAATGAGGGCGAAGCGTCGATATCCATCGCATCCTCA
CCAATAGAGGATGAAATTTTTTCTTTATCATTTGTAAACACATCATCTGAGCGTGAAATA
TGAGATGAAACGGATGACCAGTATTGACGAACTTCTGGTTTATTCAATATCAGAGAGGAA
TCAGAGGAGAATCCGCTTGATTCCAACTGTTTATCAACCTCATTATAAGCTCCAATTTCA
GGGTATGCACCAGGAGTATTTGAGCAAATAGTCATGGACATTATGGGTACTGCCTGATTT
TAACAAAGGGGTACTCGTAATGTCAACCGTACTTCTCTTGCTGTTAGCAAAAGTATTGTT
CTTCCAAGTACAATTTTTTATTCAATTTAAAACGTCGAAACGAAGACAAGGAAATTCATT
GCCATAAAGAAGTGTATGGTATTTTACGTTGGTTTTATAAGAGGATGGCGACATATTAGA
AAATTTTTCTCTTCACTCCCCTAAAAGGATAAAGCCGCGCGGACCCTGCAGGAGGAAGTA
GTCATCGGGAAGAAGAGTAGAAAAATACATATATTTCATGGTGACAGACAATACGAAAGT
TATTTAAAAGAACTGAAAAAAAAGGTTAAGACCGCAGTAGGGTTGCGAGGTATATGACAA
AATATATGCAAAAATCTAAGACAGTGGACGGAAATGAAGATAAAAATGTACGGAACGCAA
CCTAAGAAAAAGAGAAGAATTGAAAGTAAACCTGTGTAAATAAATAGAGACAAGAGACCA
AATACCTACTCGTCTTCTTCTCTGGGGTCACCAACACCATCTTCATAGATCGCGAACACA
CATTCAGCCTCTGGTAAGCAAGGTGAGTCAACAACTTTGCATAATCTTTGACATCCCTTA
CCCTTTTTGAAACCTAATCGCGTGGTGGAAGAATGTGCCATAATATTACCACCGATAGGC
TTCTTTGGATCTGGATTAAAAGCCATACCACCATCAACTTGGGCGACCACTTGGTTAGTA
ACGACGACTGCAACACCAAATTGGTCGGCCAGCCTTTGCAAAGCACGCATAAATTTGGCT
AAATGCATTTGCCTTGCGCTTAGTTCACCACGACCAGAAAAATCCGTACGGTATAGAGCC
ATAACAGAATCGACCACAATCAAGGAAAACCGAGACTCGCTCATCATTTGGGCAGCAGCA
TCCAGAAGTCTTAACTGATGGTCGGCATTATAGGCTCTTGCATACGCAACGTTGTTCAAA
GCATCATCCGGGTCTAATCCGAACCGCTGAGCTATGGATACCAATCTTACCGGCCTGAAA
GTACCTTCGGTATCGATATACAAACACTTACCTTCACCGCCACCAATATCCAATGGAATT
TGGCATGTCACGGCCAAAGTGTGACATAGCTGGGACTTACCTGTTCTGAATTCACCGAAA
AGCTCAGTAATGGAACCAGTTTCCACACCACCACCCAAAAGAGTGTCCAAATTCTTAGAA
CCCGTTGTCAAACAAATCAGCTCCGATCTTCTCATATGAAAATCAGCAGCCGTGACAAAT
CCCATAGGCACTAGCCTTGCCGCTTCGTTTAGCAACTTATCTGCCTTAGCTTCCGATATA
CCTTTGATTTCCAATAAATCCTTTCTGGGGGCATATGCTACCGCTTCAGCAGTGTGAAGC
CCACTCTCCCTTAGTTTTTTCACATCCGCCATAGTAATCCCGTTCACTTGCAGTTTTTCT
ATTGGCACAAACGAACCTAAGGCAGCTTCATCGTATGCTTCATCCTCCATTTCACCTTGC
GCTTCCGCTTGCTCCTGCAATCCGCCACCATCGCCGGAGCCGTTGGTGGCCTCAATATCT
TCGCTGCCACCGTTGCCGTTTCCATCAACGACTGACTGTGAAAGGTCTGCTGGTACAGTG
GACATCAACGAACCGTTCCCGTACTGAAGCTGTGACTCTGATATATGTTGTTCTTGAACT
TGAGACATATGACGATAACAAATTAGTAGGCCTTTAACAAATAACTACGTCTGCTCTTTG
TCGCTACACTCAACTACTAGTATATGGAAACTACGGAAGATAGAAGAAGTAACTGAGAAA
ATTTTTTCTCCAGTCCCCACTATTCCCCTTTATGGTCCCACCACGCGTACTGTAAACAAA
CCAGGACAGAAATAGCGGAAATGACGCGTAGCATAGGGTAACGAAGTGTGGCCTAGTCGT
GGGATATGGTGAGACGGTGATAAAACACTGATGCAACTGGTTGGAATGCTCAGGGAATGC
TCAAGAAGGCCACCTGTTGCAGGATAGCTAAACTAGATTGGTTGAAGAACGGTAGTGGTG
CATTTCCAACATTTACCGTCCATTTTAATTTACTCTGTGACAATGATAAGCCAGATCGCT
ATTAACGTGGTGTAGTCATGTGACCGGATGGCACTGCCGGTGGCAAAAAAGTGCAAATGC
AGGGGCGATGAAAAGAGAGGAAGAAAGAGTTTATGGCATAGTAGAAAGGCCAATTAAATC
GGGAAGCTGCTAAATAAGTTTGAACCGTAGTTTTGAAGTAGAGTGCGTTTCTTGCGAATT
GTGGTGAAAATATTGAACAGTGAATAAAGCATAAAAAAAATGTCGGATCCAAGTTCTATT
AACGGTGGTATCGTCGTTGCGATGACAGGTAAAGACTGTGTAGCCATTGCCTGTGATTTG
CGTCTCGGAAGCCAGTCACTAGGTGTGTCGAACAAGTTTGAAAAAATCTTCCACTATGGG
CATGTGTTCTTAGGGATTACCGGTCTGGCTACCGACGTGACTACTCTGAACGAGATGTTC
CGCTACAAGACGAACCTATATAAGTTGAAGGAAGAAAGGGCCATTGAGCCTGAAACGTTT
ACCCAATTAGTGTCAAGTTCACTTTATGAAAGAAGATTCGGTCCATACTTTGTGGGGCCG
GTGGTAGCAGGTATTAATTCCAAGTCCGGGAAGCCCTTTATTGCGGGATTCGACCTAATC
GGCTGTATCGACGAGGCCAAGGATTTTATCGTTAGCGGTACTGCATCCGACCAACTGTTC
GGTATGTGTGAGTCCCTGTACGAACCTAATCTAGAGCCAGAAGATCTTTTCGAAACTATA
AGTCAGGCCCTACTGAATGCTGCTGACCGTGACGCTCTATCAGGCTGGGGAGCTGTAGTA
TACATTATCAAGAAGGATGAAGTGGTGAAGAGATACTTGAAGATGAGACAAGATTGATCG
GTTCATGGCAATCTCATGGTCCCAAAAAAAACCCCAACACAAAATATCAGCGGAACGTCA
AGAATTTTCCACATCCAACTCATCTTTAATTTTTAAGTAAACAGAATAGATCGAATGAAT
ATATAAATACTAAAATGCATAAAGTCAGTCGAAGATCCGAGTAGCTATCCGCTGGCTGTC
CTTTTCTAAGGAGCAGCGTTATTCACCAGCCGCGAGTCTCTTGAAAAATTGGCGCTTTTA
ATACTTATTAGGATGGGGAACTTGATTCTTTGACGGGTTTGTCAGCAATTAGTACGACTA
TCCTACCTCATCAAGAAACGAAACTATGATCGAAGAGAAGAAGGAACGTAAGAAACGCAG
GGTTCTTCAAATGGCCAGATTTTATGGTGCGGCCGCCTTCACCCTGATTACCATGAGGCT
TATCTCCAGGGCCATAAAAGTACGAAAATGTATGTATTTTGTCCTAGTTCAGTGGCAAAA
ACTAATAATAGGATATAGTTACTAACACCGTCTACTGAAAGCAGACGTCCCCAGCATATT
TCAACAAAATTACAAGCTTCCACCTTTTTCCCAAAGGAATGAAGCCATGTCAGCGTTAAC
GTATGTATCCGCCGCTTCAATAGGTACGTTCAGCACATTGATATTCGGCTTTTGTTGGGC
ACTTGACATTTCAACCGCAAGAGAGTTTGTATTTAAGACTAGAGAGTTCATGGGCGTTCC
ACAAGCCTTAGAAACCGACACGAGCATGGACGAAGAAACCTCCAAACTAACCAAGCAATT
GCAAGACCTCCTGTCGAGCGAAAACAACAAGTAGCACTACGCATTGGCTTAATCTCTTTA
AACTGTAAATAATGGTATAACTACGAGCCGTTGCCGGCTGGTCACATATCGTATATCCGT
ATACATTCTTTCTTCTTTTAATTATACATATTGTAATCTTTTTCTTTTTTGCATTCTCTT
AAAAATTGATTGATCCATCGGCGAAATGGAAGATGGAATATCAAGCAGTTCTATTGTTCT
TGGATATAACTAAGGTACTTTCAATTTGTAGGTGTACACGCTAGGGAGGTTGCTTCGTGC
TGTACCGCTTCTATTAAGTTTTTGAAATTCACAATGAGCATACCTCACAGTGCAAAACAG
AGTAGCCCTCTCTCAAGTCGGCGCCGGTCAGTAACTAATACTACTCCACTGTTAACCCCT
AGACATAGCCGTGATAACTCGAGCACCCAAATATCAAGCGCCAAGAACATCACCTCCAGC
AGCCCATCAACCATAACGAATGAAAGTTCCAAAAGAAATAAACAAAATCTGGTACTCTCG
ACCTCATTTATCTCCACCAAGAGGCTAGAAAATAGTGCGCCTTCACCGACCAGTCCCTTA
ATGGCAAGACGAACGAGAAGTACTATGACCAAGGCACTTTTAAATCTTAAAGCAGAAATA
AACAACCAATATCAAGAATTAGCTCGATTGCGCAAGAAAAAAGACGATATCGAACATCTT
CGGGATTCTACAATATCTGATATATACTCTGGATCTTACTCTACGAATCATTTACAAAAG
CACTCGATGAGGATTAGAGCGAATACTCAACTTAGAGAAATTGACAATTCAATAAAAAGA
GTTGAGAAGCATATTTTTGACCTCAAGCAACAGTTCGACAAGAAAAGGCAAAGATCACTC
ACAACATCCAGCTCAATAAAGGCTGACGTGGGGAGCATCAGGAATGATGATGGCCAAAAT
AACGATAGTGAAGATTTGGACGACCATGATAGTTTGACAGATCAAGTTACTCTTGATGAT
GAATATCTTACGACTCCCACTTCTGGAACTGAGCGTAATAGTCAGCAGAACTTAAATCGT
AATAGTACCGTCAACTCACGGAATAACGAAAATCATTCTACGCTTTCCATTCCAGATTTA
GATGGATCTAATAAAGTAAACTTAACCGGTGATACTGAAAAAGATCTTGGTGATCTTGAA
AACGAAAATCAAATATTCACATCCACAACAACTGAAGCAGCAACATGGCTTGTAAGCGAT
TATATGCAAAGTTTTCAAGAAAAGAACGTCAACCCTGATTTCATTGCTCAAAAAGCAAAT
GGCCTGGTCACTTTATTGAAAGAACATTCGGAGATAAGAAAAGATCTGGTTTTAACTTCA
TTTATGTCATCAATTCAAAATCTGCTTCTCAATGGAAACAAGCTTATAGCAGCATCTGCT
TATAGGGTATGTCGTTACCTAATAAATAGCTTGATTTTTATTGATGAGCTGTTAGAGCTA
AGACTGGATGCATTCATAATCATTTCCCTTGCGAAGGATAATTCTTTTCAAATAGAAAGG
GAACAAGCCTTAAAAATGGTACGAAGATTCATTGAATACAACAACGGTGTTACTCAAGGC
ATTATGCAAGCTATAATAAGCTGTGTTGAAAAACCTGAAGACTCCTTAAGGCACATGGCA
TTAGAAACTTTGTTGGAACTTTGTTTTGTCGCCCCTGAAATGGTTAAAGAATGCCGTGGT
ATGAGAGTGATCGAGGGATTTTTACAAGATTATACTTCTTTTTCACTCGCATCAGTAATA
CTTGATACTATTTTACAATTGATGGCTACACACAAGACAAGGCAACATTTTCTGGAAGAT
TTCAATGTATCTGTGTTAACCACGGTCTTTTCGGATACAAATACAAAGTCAAACGTTAAT
GTGGAAAAAATGCAAAACGCTTCTACACTTATCTCAATAACTTTGAACAGCTACAATGGC
TTTATGCTTTTTTCTAACAACAATTTCAAACCGTTAAAACAGCTGGTGTCATTCTTCCAA
ATTCCTATATGCGCCCAATATCTTATCGACATCTTTCTTGATGTTTTGAAAATCAAACCA
CTACCATACAAGCCAAGGGGCAGACATTCTCATTCTTTCAAACCAATCCCATCTCAGTAC
TACAAAGAATGCATGTCTGTGAATCAACGGCTAGCCTTAATTGTGCTAATTCTAGAAAAC
TCGGAATTTGTACCCCACCTCCTTGAACTTTTGAACGAAGAAGATAGAGATGATCATTTG
GTAGCAAAAGGCAGATATCTTCTTACCGAATATTTTAATTTAAGAATGAATTTAGTCGAT
AAAAAGTATACTTCAGTATCAAAACCAATTTACAAGGAGAACTTCACTTACGTCAATGAA
ACATTCCAGTTCAAGAAGATCGCTTATAAAATGAATAGAAACAGGAATACAATTGGCATG
TCGGGCATTGATTATGCTCAAAATATAAAATCATTTTCCAAAAATATTAAAGAGAATACT
CTTCTCCGCGAAGTAGATGATTTCCGATTTAGAAGAATGGTTTATGACTCTAAAGTTTTG
CAAACGAAGGATTTTACGCGATGGAATTGGAACATAATTAACGAATTACTTGAAGGACCA
TTACTAAATAAAAAGCAACTAGAAGAATTAGTTAAATCAACCAAATTCATCAGAAGACTT
TTGGTGTTTTACAGACCACTCAGATTGAGATTTTCCAACGTCAATAAAGGCGCAAAACTA
TCTCAAAAGTATGTACAAGTTGGATGCCAGTTTTTCAAAACACTAACGGCGACTCCAGAA
GGAATGAAAATCCTTATGGATGATACAAAAATTATACCGCAACTGGCGTCTTTAATGTTT
AGAGCAATGGAGGGAAATATATCAGGCAACATCTTCAACAAGAATAAACTACGAGAAAAA
ATAATATTTGGATACTTCAAATTCATCGGAATATTGACGCAGTCAAAGAATGGGGTTCAT
ATCCTAACGAGGTGGAATTTTTTTACCGTAATCTATAAGATGTTTCAATTTGAATCGAAA
CTGGGGCTTGAGTTTCTATTATTAACAATACCAGAATTAGATTTGAAATATTCATCACAT
TGCCGCGTCATTATCGGCAAGGCCCTTGTAGTGGCCAATGAGAAAGTTAGGATTGAGGCT
ACAAAGCATATAGGCGATAAACTAAAAGAACTGTTATCCACGAAAGAAAGTGATCTTAAG
TTAAAAGCGAATAAAGTGAAACTGCAGCAATTCAAAATGGAAATGTTAACAAGGCAACTA
TACGACCTGAGCCCCAGCGTAGTCGCCGTAGCAGACCAAGCTTTATATGAATGTATTGTC
GCGGGCAATGGTTCTGAAGAACTGGGCACCTCATTTAGGATGTTTTTAAACCAAATGGTA
TTCATTAGGTCTCCAATACTTTTCGAGTTATTAAGCCGCCCATACGGGTTCCAGTTGTTG
AACGAAATCAATTTTGTGAAGGAGGAAAGGGATTCGTGGTTATCTAAAAAAAACATTGAG
TATGTTCATATTGTGGAGGAATTCCTGAAGAAAAATGAATCAATTAATGCAAAATCCCTC
ACATTTCAACAAAAGAGTCGCCTGCCATTGCATTTTTATGAAAGTCTAACGAAAACAGAA
GACGGAATATTACTATTAAGCCAAACAGGAGATTTGGTTACTTTCATGAACGTTATAAAA
AAATACGTCAACGGAAACAATATGGCCACAGTAGAAAATGCCAAAGAAATTCTCGACTTA
AAAGCAGCATTATGGTGTGTTGGGTTTATCGGATCCACAGAATTGGGGATAGGTCTACTA
GATAACTACTCATTGGTGGAAGATATTATTGAGGTGGCCTACAATGCCAGCGTAACCAGC
GTTAGGTTTACAGCGTTTTATGTTCTGGGATTAATCAGCATGACCCGCGAGGGTTGCGAA
ATTCTAGACGAGATGGGATGGAACTGTTGTGTCAGTGTACAAGATGAGCCTATCGGGATC
GCACTACCAAATAGGCTCGATAGATTTCTATCGTATAACGAACACAAATGGTCCGCATTT
AGCGAGTATTCTGATGAGATGATTGTTTTTAATAAAAGCGATGGCGACTTGATAGAAAAA
TGCTTACCCATCGAATTTGATTTGGACAAACTACTCAAAGAGAAAGATACCGCAGAGAAT
CCATTAAATGAAAAAATCATTACTAATAAATACGACAACGATATCACAAGTCAAACTATC
ACTGTTTCAGGTGAAAATAGTAGTCTTTTCGCAAACGAAGGCCTTTCTTCTCCCTATGTT
ACACAATACCGCAATGACGATGACTCCATTGAGAGCAAGGTCCTACATATAGTAAGTCAG
CTAGGCAATCATATCCTTTCAAATCACGCAGTGAAGGAGATTACAGAAATAAACAATAAA
TACGGTCCAAGGCTTTTTGAAAACGAGAAAATGTTCTTCAAAGTATTTAATATGATGTCG
AAGTATCGGTTTAAGCCACATGTTAGGAAGTTTCTTTGCGGACTATTTATTAACAATAGA
GCGCTTGAAAATGTCATCAGGCACGACAACAAAAGAGACAAAAGGCCGGCTAATTTTACA
CGTTAGAGCAAAAAAGGGCCGCATGTATAAATGTATATAGTCACAATATTCCATAGACCC
AGGCACTTCCCTACACCACAGCATACAAAACCGTTATGGTGTGTGCGTATCATTATATAA
TAATGGGGTTTCCTTGTACAGAGTATAAGCATCCATTAGCTCCTCGGGAACCTCAATATC
TTCATCGTCCTCCAACTTTTCTGTAATTAATGATATCTGATCATTGTACCACTTCAATTC
GGGTACTTTCTCTACTGTTGCTTGAGATATTAAGCGTGGGAGTTCCGTTTCAGCAGAACC
AGTATCTGCATCATCAATACTGTTCAGTACCGTTATCACGCTCGATACTTTTCTCAATAA
TGTAGTGTATTCCCTTTTTAGAGTCCCATCCTGTTTGATAAGCTCATCATTTCTTGCTGA
TATCTTCCGTATTTCTTTGTCTATAACGCTCTCTGGATCTTTATTAGGCATTTTTTTCTT
GTTTTATAATCAGTCAAGTATTGGTTTCCCACAGCCATTCAACTCAGGTTCATCATCTTT
TTCGCTTCCAAAAATGCAGTTGATTTCACACAATTTTTCATGAACCAGGGTCCTGCACTC
CGGGTAAAGGACCATCACGCCACATCACGTGCACATTACTAGTAAAAGCCACAGGAAATA
TTTCACGTGACTTACAAACAGAGTCGTACGTCAGGACCGGAGTCAGGTGAAAAAATGTGG
GCCGGTAAAGGGAAAAAACCAGAAACGGGACTACTATCGAACTCGTTTAGTCGCGAACGT
GCAAAAGGCCAATATTTTTCGCTAGAGTCATCGCAGTCATGGCAGCTCTTTCGCTCTATC
TCCCGGTCGCAAAACTGTGGTAGTCATAGCTCGTTCTGCTCAATTGAGAACTGTGAATGT
GAATATGGAACAAATGCGATAGATGCACTAATTTAAGGGAAGCTAGCTAGTTTTCCCAAC
TGCGAAAGAAAAAAAGGAAAGAAAAAAAAATTCTATATAAGTGATAGATATTTCCATCTT
TACTAGCATTAGTTTCTCTTTTACGTATTCAATATTTTTGTTAAACTTTTCCTTTATCAT
AAAAAAGCAAGCATCTAAGAGCATTGACAACACTCTAAGAAACAAAATACCAATATAATT
TCAAAGTACATATCAAAAATGGTTCAATCTGCTGTCTTAGGGTTCCCAAGAATCGGTCCA
AACAGAGAATTAAAGAAGGCCACTGAAGGTTACTGGAACGGTAAAATCACTGTCGATGAA
TTATTCAAGGTCGGTAAGGATTTGAGAACTCAAAACTGGAAGTTGCAAAAGGAGGCTGGT
GTTGATATCATCCCATCCAATGACTTCTCCTTTTACGACCAAGTTTTGGATTTGTCTTTG
TTGTTCAATGTCATTCCAGACCGTTACACTAAGTACGATCTATCTCCAATCGACACTTTG
TTTGCTATGGGTAGAGGTTTACAAAGAAAGGCCACTGAAACTGAAAAGGCTGTCGACGTC
ACTGCTTTGGAAATGGTTAAATGGTTCGACTCTAACTACCATTACGTTAGACCAACTTTC
TCCAAGACCACTCAATTTAAGTTGAACGGCCAAAAGCCAGTTGACGAATTTTTGGAAGCC
AAGGAGTTAGGTATTCATACTAGACCTGTCTTGTTGGGTCCAGTTTCTTACTTATTCTTG
GGTAAGGCTGACAAGGATTCTCTAGATTTGGAACCATTGTCCCTATTGGAACAATTGTTG
CCTCTATACACTGAAATCCTATCTAAATTGGCTTCTGCTGGTGCCACTGAAGTTCAAATT
GACGAACCTGTCTTAGTTTTGGACTTGCCTGCCAACGCCCAAGCCGCCATTAAGAAGGCT
TACACTTACTTCGGTGAACAAAGCAATCTACCAAAGATTACTTTGGCTACTTACTTCGGT
ACCGTTGTCCCTAACTTAGACGCCATCAAGGGCTTGCCAGTTGCTGCCTTACACGTTGAC
CTTGTTAGAGCTCCAGAACAATTTGATGAAGTCGTTGCCGCCATTGGTAACAAACAAACC
TTGTCCGTTGGTATTGTTGATGGTAGAAACATTTGGAAGAATGATTTCAAGAAGTCTTCC
GCTATCGTTAACAAGGCTATTGAAAAGTTGGGTGCTGACAGAGTCGTTGTTGCCACTTCT
TCTTCTCTATTGCACACACCAGTTGATTTGAACAACGAAACCAAGTTGGACGCTGAAATC
AAGGGCTTTTTCTCTTTCGCCACTCAAAAATTGGATGAAGTTGTTGTGATCACCAAGAAC
GTTTCCGGTCAAGACGTTGCTGCTGCCCTAGAAGCTAACGCTAAATCTGTTGAATCCAGA
GGTAAATCCAAGTTTATCCACGATGCTGCCGTTAAGGCCAGAGTTGCCTCTATCGACGAA
AAAATGTCTACTAGAGCAGCTCCATTTGAACAAAGATTGCCTGAACAACAAAAAGTCTTC
AACTTGCCATTGTTCCCAACAACAACTATTGGTTCCTTCCCTCAAACCAAGGACATCAGA
ATTAACAGAAACAAATTCAACAAGGGTACCATCTCTGCTGAAGAATATGAAAAATTCATC
AATTCTGAAATTGAAAAGGTCATCAGATTCCAAGAAGAAATTGGTTTGGATGTCTTAGTC
CACGGTGAACCAGAAAGAAACGATATGGTTCAATACTTCGGTGAACAAATCAACGGTTAT
GCTTTCACTGTTAACGGTTGGGTTCAATCTTACGGTTCCAGATATGTCAGACCACCAATT
ATTGTTGGTGACTTGTCCAGACCAAAGGCTATGTCCGTCAAGGAATCTGTTTACGCTCAA
TCCATCACTTCTAAGCCAGTAAAGGGTATGTTGACTGGTCCAATTACCTGTTTGAGATGG
TCTTTCCCAAGAGACGATGTCGACCAAAAAACTCAAGCTATGCAATTAGCTTTGGCTTTG
AGAGATGAAGTCAATGATTTGGAAGCTGCCGGTATCAAGGTTATCCAAGTTGATGAGCCA
GCTTTAAGAGAAGGTTTACCATTGAGAGAAGGTACTGAGAGATCTGCTTACTACACCTGG
GCTGCCGAAGCTTTCAGAGTTGCTACTTCTGGTGTTGCTAACAAGACTCAAATACACTCT
CATTTCTGTTACTCTGACTTGGATCCAAACCATATCAAGGCTTTGGATGCTGATGTTGTT
TCCATCGAATTCTCTAAGAAGGACGATGCTAACTACATTGCTGAATTCAAAAACTATCCA
AACCACATTGGTCTAGGTTTATTCGATATTCATTCTCCAAGAATTCCATCAAAGGATGAA
TTTATCGCCAAGATTTCAACCATCTTGAAGAGCTACCCAGCTGAAAAGTTCTGGGTTAAC
CCAGATTGTGGTTTGAAGACTAGAGGCTGGGAAGAAACTAGATTGTCTTTGACTCATATG
GTCGAAGCCGCCAAGTACTTCCGTGAACAATACAAGAATTAAGGTTTTAAAAAGGAAGCA
AAGTAATGATATTTTCTGAACTTTTTGTTTTTTATTCTGGGATTCAACATCGGTGATTTA
ATTTTTGTGTTCACATTTAAAAGTTTATTTGGGTAATTTTTTGATATCAATTTTATTACA
AAGCCATAACTCTTGCATTTTTTTTATTATATTTTTATATACACGTACATTCTGTATTAT
TTATAACGCATTCAACATTCGTTTTCTAAAATTTCCTATATTTTTTGAACAAAAATTTTT
TGGTTGTAAGTCGGACCAAATGTATATGTCGAAAGAATAATACTTTTCAGGATCCTGCTA
TACATCATTATATCATATTATTCGAAAACTATAAAAATGTCGTCTAAGGGGAAAAAAACA
GAGAATGCCCTTTTTAAGCTGATCCTACGATATCGGCCCACAATTCTTCTGCTTGCACAA
TAGTACTGTGATTGGCCATCATTTTATTCATGGTTTCGACATATTCATCGTACTCATCTG
AATCGTAAACAATACCACCGCCAGCTTGCAAGTAAGCAATGCCATCTTTATAGACCATAG
TCCTTAAAGCGATACAATTGTCCATTGTTTTACCGTCGTATGACCAATGACCTACGGCGC
CTGCATAAACCCCACGCCTTTCTCCTTCTAGTTCGGCAATCAATTCCATGGCTCTAACCT
TTGGAGCACCACTGACAGTACCTGCAGGGAAAATCGATCTGAATGCATCAAATCTTGTCT
TTTCTGGGCGGAGAACACCGCTGACTTGAGAAACCAGATGTTGGACATGAGAAAATTTTT
GAATAGTTAACAGTTTATCGACACTTGTTGTTAATGGGTCACAAATTCTGTTAATATCGT
TTCTTGCTAAATCTACCAGCATAACATGTTCTGCACGGTCTTTTAACGAGCCACGTAATT
GGTCCGCTAAAGCATCATCCTCTTCAGTAGTAGCCCCACGTTTGACAGTACCAGCAATTG
GATGGGTAATGACTCTATTTTTGGAATCCGATTTGCACAACAATTCTGGAGATGCACCAA
TGATTTGGAAATCCAAACAATCAATATAAAACAGGTAAGGAGATGGGTTCACTGTACGTA
AATGTCTGTAAATATTGAAAGGATGTAACGAAGTTGGCCTTGCCACTCTTTGCGATGGCA
CACCTTGAATAATATCACCTTTCTTAATATGCTTCTTCAAAGTGGAGACGTGATTTTCGT
AACCTTCCTTGCCCACATTCGATTCAAAAGTTTGATTCAATTTAATAGGAGGTTGTTCTG
GATATGGTATTGGCGAGGAATCGTCGGTTAGCTTTGATACGATATCAGTGATTATTTGTG
CTGCAGCTTGGTAACCTTCCTCCAACGAAGTTTCATTGGTATTAATGTTATGAATGATTT
GAAATCTCTGAAAAACATTATCAAAGGCAATAATGGTATCACAAAGCATTAAATATGCCT
CTGGAAGTCTTAGGACATCTTTCAAAGGCCTTCTTGTTTTTGGCTCGAAATAACGAACAC
AGTCATAAGAAATATAACCAATAGCACCACCACTTAATTTCGGTAAACCAGGAACATTTT
CGGCTACTTTAAAGGTAGACATCTCCTTTTCCAAAATTTCCAAAGGATCTGTTTCAATGC
CTTCAGTAGGACCGGTTTTGATGGTCTTGCGTGGCGAGATACCTATGAATGAATAACGAT
CTAATTCATTATTTGTCTTAGCACTTTCCAACAGAAATGATTCCTTTCTATCAGGGTTGT
TCAATTGTGCCAATTTTAGATATGCCACGTGAGGAGTCAGATCCAATGATGGCAAATACG
CATACACGGGATACATATTTATGGAACTATCGTCATTTTGCTGCTGTAATTGCTTTAGAG
AGTCAATATCCGGTTGAATTTTGATGGAAGCGGTCATTTTTTGCCTTTTTTCCAATCAGA
ATATCAGTGCTAATTATCGATTGTGGCCTCGGTTTTAAAGTGATGATTGCCTTCTGCTAC
GATGGACCATAGCCCTTTAGTCATGTTAATATATCAAAATCTAACAATACTTCGATGAGT
GAAAAATCGTAATGAGTCAGCAAATCACTGTGTACGTTAATGCCTTTAACAACTTTTTTT
TTCCCACAAACTACTTCAACGATTGAAAGGATTATTCTAAAAAAAAAAATATCATGCTGA
TAAATGGAAGGGGGTGGTAAAACAAAGAAAACCAGCCAATTCGGATTCTGACAGAGCAAA
TTGAAACTGGATATTATAGTGCTAAGTATATAGACTTCTGTTTTGTTCTTTAAAACTAAA
TAAAAAAAATTCACCCTCCTCCCCACGGAATAAAACTACAACAAGTTCTGTTATCAAGGA
CAATTAGTGTATATTAGTTGTTGTAACATTTTTTACTTTCTCTTTTTTTTTTCATTGATT
AATTATAACTATTCGTTCGAGATAGTAGTTTTCCGATTAATAACATCCCTAGGATTTTGA
CTATTCCATTGTTGTATAAAATATAGAGAACCAGAAAAAGAAAAATGGGACAAATTCTAT
CAAACCCGGTAATTGATAAAGAGAGCCACTCCGGTGCTGACTCCTTGACCGCGTTTGGAC
TGTGTGCAATGCAAGGGTGGCGGATGTCAATGGAGGATTCACACATTCTAGAGCCTAATG
TTTTGACAAAGTCCGATAAGGACCATATTGCATTTTACGGTATATTCGATGGTCATGGTG
GCGCTAAAGTAGCAGAATACTGTGGTAATAAAATAGTGGAGATCCTGCAAGAGCAGAAAT
CGTTCCATGAAGGAAATTTACCAAGGGCTTTGATTGATACTTTCATAAACACAGACGTGA
AACTGTTACAAGATCCTGTGATGAAAGAAGACCATAGCGGATGTACGGCTACATCCATAT
TAGTATCAAAGTCCCAGAACTTGTTAGTATGTGGTAACGCTGGTGACAGTAGAACCGTAC
TCGCCACCGACGGGAACGCAAAGGCATTATCATACGATCACAAGCCCACTCTAGCAAGCG
AAAAATCACGTATTGTGGCAGCTGATGGCTTCGTAGAAATGGATAGGGTCAACGGTAACT
TGGCGCTCTCTCGTGCCATTGGTGATTTTGAGTTCAAATCCAACCCCAAATTGGGCCCCG
AGGAGCAAATAGTGACATGTGTTCCGGACATTCTCGAGCATTCTCTAGATTACGATAGGG
ACGAGTTTGTAATCTTAGCCTGTGATGGTATCTGGGATTGTTTGACTTCCCAAGATTGTG
TGGACTTGGTTCATCTCGGCCTTCGCGAAGGCAAGACATTGAATGAAATTTCTTCGCGGA
TCATCGATGTCTGTTGTGCTCCCACCACAGAGGGGACGGGTATTGGATGCGACAACATGA
GTATAGTGGTTGTCGCGCTGCTGAAAGAAGGTGAAGACGTCGCTCAATGGAGCGACCGTA
TGAAGTCCAAGGCCCACCGCACATCAGTGCGTTCTTTTGCAGACAAGAGAAGAAGGGTGT
TTAGTTACTAAGATTTTTCCAAATGTAACGACGAACAGGTGTTCGCTATCACTACGAAGA
AACCTCAGGACAAATTCACTCGCGACCACGAAGCCGCTGTGGCCTCGGTGACTGCCGCCG
ATAACGACGATCCAATGGACATAGACGACACGGACGCTGACACAGATGCAGAAAATCTTG
ACCCTTCCAGCCAATCCAAGAGCAAGACCTCCGGCCCCATTGATCTAGCATCCTTGGAGG
CGCTACTTGGTGCTACAGGAGGAGTGAAGACAGACAGCAACGGGAACAAAGTCACCTACA
CTCTTCCCCAGTCTGCCTTGGCCCAACTGCTCCAAACCATAGGCCATGACCCGGCTTCCT
CCCATCCCGAGAATGACAGTAACACTGACCACAAGGCCGGCCGTTCCCACTTGCAATGAA
GGATCTTCCATCCTTCATTATATATACATACCTATATACGAACCGAACGAACAGAAAGAG
AAGAGAAGACACAAGACACCACCAGAACCAAGAGCATACACCACTACCACCACCATCGCT
CCAACAGCAGGGTATCCGGATGCAGTTTGACGCTTGAAGATGGTATTCACCTCAGGGGTA
AACGCGCAGAAACTGCGCGTTTACCTGCAGCGACGCCACAAAAACGGACCGGCCCGGCCA
GAGGGTGAGACCAGCAGCGGCCCCGTTGTGAAATCTCACCCCCCAGTCCCGGATGGGCAC
GAGTCCCCAGCGTCCGTCCCATGAGGTCCTCCTAAGGTAGGCAGCGCGGATGTTTCCGAT
GCAAAGGAGAAAGGATGGACGGTACAGACATCGTAGACAGGATTCGCGCATTGCCTTGCA
CATCTGTGCTCCATCCAATCTACCGTATCTATTGTTATCGTCGTGTGTGCTACTCTTTTC
TCCGACAGCCTCGACAAGACGGAATCAGAAAGTGCACACAGTTTAAAAAGGAAAAAAACC
GAGTACAACAAAAACAGGGACAGGTTTTGAAAAGTGTTCTTTTCTTTGCATCTTCTCTAT
TTCTTCTCTCTTTTGTAGTATATTTATCCGTGTTTCCTCCTTTTCACAGTCAGTTCATCC
GACCTCATCGAATAGCTTCCGTGCACGTTCCAGTCTTCCCTCCCTTCTCTGCTCCGTGAT
GTCCATTTCAACCAGTTTGAACTCAGCTTCCATTCATTTGAGCAGCATGGACACCCATCC
TCAGCTACACTCACTCACTCGTCAGCCACACTCGTCGTCAACAGCTATGTCCAAGAACGA
AGCCCAGGAATCTTCGCCCTCTCTGCCAGCTTCCTCTTCATCGTCGACTTCGGCATCGGC
ATCTGCGTCTTCCAAGAATTCGAGCAAGAACCCTTCCTCTTGGGACCCTCAAGATGATCT
GCTGCTACGTCATTTAAAGGAGGTCAAGAAAATGGGCTGGAAGGATATTTCGCAATACTT
CCCAAGCAGGACTCCTAACGCGTGTCAGTTCAGATGGAGAAGGTTGAAGTCTGGTAACTT
GAAGTCGAACAAGACTGCTTTGATCGACATCAACACCTATACGGGCCCACTCAAGATCAC
CCACGGCGATGAAACTACCAACGTTCAGCAAAAGCCCAGCAAGAAGGTAGAAGAAAACGT
ATTAACGGAAGATACTGCTGAGTTCACTACAACGTCATCCATCCCGATTCCCTCCAGAAA
GACCTCGTTGCCTTCGTTTCATGCATCGATGTCATTTTCTCAATCTCCGTCCAATGTGAC
TCCCACTACGATTGTCTCAAACGCTGCTTCTTCCATGCCGTTCGCTCCTCCCACGCTGCC
GGCCGCACTCCCTCATCATCCTCATCAACACCTACACCATCATCCCCATCATAAGACTCT
AAAGCCAAGGTCAAACTCTCACTCCTTCACCAATTCTTTGAACCAAGACCCCATCGTTCG
GTCTAATGATGAGGAGAAGTATGGATTCATTCCTAAAGTATTCGTTAGATCCAGAAGAAG
TTCGTTTGCCTATCCGCAACAGGTAGCAACAACCACTACTCCGTCTTCTCCAAACTCTTC
GCATGTCTTACTCAGCTCAAAGTCAAGAAGGGGCTCGCTTGCGAATTGGTCCAGCAGATC
ATCGTTTAATATTTCAAGTAACAACACTTCAAGACGGTCTTCAATGATTCTTGCACCAAA
TTCCGTGTCAAACATATTCAATGTCAACAATAGCGGCAGTAACACTGCTTCTACTTCTAA
TACCAACTCAAGAAGGGAATCTGTCATCAAGAAGGAATTTCAGCAAAGATTAAACAACTT
AAGTAACAGTGGAGGCCCTACCTCCAACAACGGGCCCATTTTCCCCAACTCTTATACCTT
TATGGATCTCCCACATTCTTCATCGGTGTCATCGTCATCCACTTTGCATAAGTCTAAACG
AGGTTCGTTTTCTGGCCATTCTATGAAGTCATCGTGTAATCCGACTAATCTATGGTCAAA
AGATGAAGACGCTTTGCTAATGGAAAACAAAAAGAGAAACCTATCCGTTATGGAACTATC
CATTCTTTTGCCGCAGAGAACTGAGGTAGAAATTCAATGGAGATTAAACGCCTTGTCAAG
TGATGCGGATATGTTGTCTCCTACACATTCACCTCAAAAAACTCTGTCCAAGAAAACTCG
TCCAAGAATGTTCAAAACTGGTTCTACCACTGATGATGACAAAGGTAGCGACAAAGAGGA
CGTTATGAGTGATGGTAGTAACGATGATGACGAAGATAATGTAGACCCGCTGCATCGTGC
TAAACAATCCAGTAACAAGACTGTCTTTTCATCCAGCAGTTCCAACATATCCTCCAAAGA
CGTTTCACCGGATCCGATCTTTTCACCGGATCCCGCAGATGATTCATCGAATACTTCTGA
TGATGGTTCTAGGTGCACCATAACCTCCGATACCAGCTCCTCGGCTGCAACCATGAATCG
CACCCCTAATTCCAAAAACCCGCAAGATATTGCTTTGTTAAACAACTTTCGTTCTGAAGC
CATTACTCCGAGACCGAAGCCTTCTTCCACAACTACATCCATCACTACCGAAAACACCAA
TAACATGATAAACCATTCTAGTTCTACAACTACTACCACAAACAACAGTCCGCTGCCAAG
CATAAACACTATCTTCAAGGATATGCTGTGAGGGGAAAACTTGAAAAGAAAAAAAAATAA
AAATAAAAAAATATCAACAACAAAAAGAAAAACGTGAATTTAGCGGGCTTGTTCATTAAA
TTTCTATAGTTTAGCATATTTAAAAGTATAAAAGTTTCTTTGGTTTATATGACGTATTCA
TCCATTCTTCATTTCCGCTTCAACTATTTTTTTCGTGGAACGCAAACAACGTTACCCTGA
ACTTTTCACATTGGAAAAGGAAAGCATCATAAAAAATCGTGTTTTTATTTTAATACACGG
TAGCCTCTTGATGAAGGGAAAAGATTTCAACCACCACTTCAAAACACCACACTCTACCTC
CTACCATACTCCATAATGTCAAGCCCAACTCCTCCAGGTGGTCAACGTACTTTGCAAAAG
AGAAAACAGGGAAGTTCACAAAAAGTTGCGGCATCCGCTCCAAAGAAAAACACGAACAGC
AATAATTCGATTTTGAAGATTTATTCTGATGAGGCTACGGGACTAAGAGTAGATCCCTTA
GTTGTGTTGTTTCTAGCGGTCGGTTTCATCTTTTCTGTTGTTGCATTACATGTTATTTCT
AAAGTTGCCGGTAAGTTATTTTAAGAATTTTCTTCAGTAATGATTCAGCTTTTATCCACC
CTATTTGACAAAACAAGACTACGAGCAAACGAACGCGAAAATTGCCTTGTTTTGAATAAA
TTCTTGCCATCGGATAACGTCCACGATACTTTTTGATTCAAGTTTCTATAGAAGCACGTA
TATATCTTTAATACACTAAATACTTACTTCCACAGAACGAGGTATGTTTTTCAATTCATG
GTTCTTTTTATTTTGGAGTTATATACATGTATACAAGACGGAAATGGCTTGCTTTGTGGC
TACATATCCTTTAGCAATACGCCAATGACTTCCACTAAATGCTGGATTGGAACAGTATGT
TTCTCAATTCCATGTTCATTTTTGGTACACTTCCATTGCAGTTCGCTACATTTTTTTTCA
AACTGCTTTCTCCACAGGTCCTTTTCTCCCCATCTTATGCCACGAATTTCAATTTCCACA
TTGGGCCAACTTTTTGAGCCCACGATAACACATAATGGTATACCCATGGCATGGGATAAT
TTTATTCTAGCACCTATACCCAGTTTTTCATTGAACTGGTCAAGGATGTCATTCTGTAAA
TTTTGCATGGTAGGATCATTCAGCAGCTTTGATTTAACATCCTGTAACCTCTGTGAGTTT
TCAGGATTATTTGGTCCAGTACAAATCGATACTTTGTATGGAGCCATTATAGCGGGCCAT
CTAAATCCATTGGAATCACGCCCTAGTTCAGCAATTGCTCCAACTAGCCTGCTTACTCCA
ATGCCGTAGCAACCCATATGGACAAATGTCTCGTTTTTGTTTTCTTTGTCGACAAACTTG
ACATTTAACGGCTTCGAGTATTTATTACCCAGCAAAAATATGTGGCCTACCTCAATACTT
TTGAGAGGTTCTAACCTTCCTTCCTCACATTTGCCACAGATTTCGTTTTCCTGTGCATCC
ACTATAGAAACGTCACTGATTTGACCAAAATTATTTTTCAGGTATTTCTTTAGTGGAAAA
TCAGGAAAGTTGGATTTTGAATTCAATCTACAGTCCATAACTCTTAATATTTTACTGAAC
ATAATATCTTCGTTATCTTTTTCGTAGACTTGTAAGACGTGATCATTTGGTTTGTTCCTC
AACGTCAAATCGATGTCTTTATCCATAGCATTTAATGCTAAATTCCAATTCAATTGTCTA
TCCTTTGGATAGTAGAAACATATCAATGTTGAGTGATCCTTAGTCAAAGCATACTTACAA
TCGACATCACCTGAATATTGACCATCTTTTTCAGGATATGACTGGGACATATCCAAAGTT
GATATATCGCCGCAATGTTTGCAACTCATCAAGGTATCCTCACCGGATTCATGAATCAGG
TGAAATTCTTTGCTAAACTCACCGCCAATGTCACCGCTATCTGCCCACGCACTAACAAAG
GGGATTTTCAGATCTTTGAATATCTTATTGTAAGTATCATCTAGCTTTTGAAAACTGGCA
AACGCATCCTCTTCATTACTAGCAAACGAATACGCATCCTTCATTAAAAATTCTCGTCCA
CGTAAGATACCACCCCTGGGTCTGATTTCGTCCCTATATTTTCTTGTCATTTGGTATATT
GTGATAGGCATATCTTTATAACTAGCAATGTAATTTTTCATTAAATCTGTAATGTCCTCC
TCACATGTTGCTGTCAAGCAGTACTGCTTCCCTTTAGAATCCTTCAATTTAAATAATTCA
CTGTTGTTCCAGCGATCCGTCGCTTGCCATAATGCTTTTGACGAGATAGCACTTAATGAA
ACTTCTATGGCTCCACCATCGCTATCCATTCGGTTCCGTATAGCATTTGATACTTTATTA
AGTGATCTGAGTCCAAGTGGCAGCCATTGGAACAACCCAACCTGCGAGCGTCTTACGAAT
CCCACAGTTTGAAGTAGTTCCTGAGTAGTTTCAGATTTCAGGGTATTGTTTGAAAGAGAT
TTTGGGTGAAAAATATGACATGATCGAGACAATGTACGATATTTCAACATGGCTATGTGG
AAGAAGTCAATCTTCAAAAAAAGGCGTTGGTCAATTAGTGGTTTTGAAAGGAGTATAAAA
TCCTTACGTCTATGTTTCAAACCTTGTTTTCATTTGTTCATCCATTACCGCCGTATTTAC
AAAGCAGAAAATTATAAATTAATGATCACTGTTTAAGTTTATTCTACAGGAAATAAAAGG
GGAAAACTGGAAGAAGAAAACAAGAGAACTGTAAATCTTGTATTGAATTGGTTTATAGGT
TCACATGATATGAGTATAAATATGAGTAACATACACGCGCTGTCTAGTATTTAAATTATG
ACGACGTTCATTTTACCTAACAAGTTGTTGCGTAAATTTATAAAGTAAATTGTCGGTTTT
AATATTTCAAGAATTTTTGATAAACAGTGTTATCAGTTTCATCATGATAAGTGTAGCCTA
AATCTTCCAAGAATTTTTGGAAGGTTAAGTTTTCCCTTGGAGGAACGGAAATACCAGCTA
AAACCTTACCGATATCGGCACCATGGTTTCTATAATGGAATAAAGTAAGATTCCAAGAAT
CGCTTAGGCCTCCAAGGAACCTAGTCAAGGCACCTGGTCTTTCAGGGAATTCAAATGAAA
TAATTCTTTCATTAGGAACCTTAGAAGCACCACCAACCAAGTATCTACCATGAGATTTAG
CCAATTCGTTATCGGAGATATCCACAGCTTCAAAACCTAAAGCATTCAACTGTTGCATAA
CTTGCTTGATTTCCTTTTCTCTGTCAACGACGCTGAAAGAAGTGTAAATGTAAGCCTTGG
GCACTTCACTAGAGGACTCATGACGATGTTCATTGTAACGGTAAGAGAATTCAGTAACAG
ATCTTGGGTGGATGATCTTTTGCATTTTCTTGAACGCACCAGGGACGTCGGGTAAAGTAA
CTAACATGAAGACTTCCTTTCCTTCACCAAGAACAGCACGTTCGGAAACAAATCTTAATC
TATCAAAGTTCATGTTAGCACCAGAAAGGATGGGAACATAGGTGTTTTTAGTGTGGTCAA
TTTCTGGATGTACGGTAGAGATGTATTTCTTCATACCGGCTACTGAAAGGGCACCAGATG
GTTCTACAATACTTCTAGTATCTTCAAAAATATCCTTTACTGCAGCACAGATTTCGTCAG
TGTTAACAAGAACAACTTCATCAACCACTTGTTGGGCGACTCTAAATGTTTCTTCACCAA
TCATACGCACAGACGTACCATCGGCAAAAGTACCCACCACAGGTAAAGGAGTTCTCTGGT
TGCGTTGCAAGGAATTATGTAAAGTGGCCGCATCGTAAGTTTCAACACCAATGATTTTGA
TATGAGGAGCAACCCTTTTCAAATAAGCACCAATACCAGCAATTAAACCACCACCGCCGA
CGGGAACAAAGACAGCACCGATCTTATTAGCGGTACGTACTTGTCTTAGGATTTCCATAG
CTACAGTACCTTGACCGGCAATGACATAAGGATGATCGAAAGGAGGAATGTTCGTCAAGC
CACGCTCTTCAGCCAATTTGGCACATTCAGCCTTAGCCTCGTCAAAATCGTTACCATATA
GGACGACTTGAGACCCTAATCTCGAGACATTTTGATACTTAATAGATGGTGTACAAACAG
GCATAACGATAGTAGCAGGTATTTTCAAGTGTTTAGCAGCAAAGGCCACACCTTGGGCAT
GATTCCCAGCTGAACAGGCAATAACACCCTGGTTTCTTTGAGAATCGTCCAACTTGGCAA
TCATGTTATAGGCACCACGAAGCTTGAAAGAGAAAACAGGCAATAGATCTTCTCTTTTCA
AGATGACATTCGTGTTTAGACGGGAAGACAAACCTACACCTTGAGAGATTGGAGATTCAT
TAATAACATCGTATACAGAGGACCTTAAAACTAAACGGACGTAATCAGGGGTGTTATCAG
TTTGCAGCTCATCCAATTTCAATTCAGAGTGTAGTTTTATCAAGGAAGGTGACAGGTGTT
GTCTGTGCAAATGAGCCTTTAGTCTCAAAAGGTTCAATCCAGACACTTTGGACTGTTTAC
CTTGCCGAACAACCGTACATAATGGTTGCTTTAGTAGAGTAGCTGACATCACTAACTTTG
TGTAATTGACTTAGTTTAAATGTGGCTTGTAGCACTCACACAAGAAAGAACTCAAAGCAG
CAACAACAAAAGTTTTCAAAGCTGATAATGAAGTATCTGCAGACATATGTTTGAGATGAC
TCTTTTTCTTTGATATTTTTTTTTCTTTTTATGCGATTCCAAATTCGCTACCCGCTGCGC
TTTTTCTTTTTGCTCTTCTTATTTTTTCTTTTTCGCGTCAATTAAAATTGAACGTCACAA
AATAGCAGAGATAATATGCAATAAAGAGAGAAGGGTTAAAGAGTCTTGGTAGTCAGGAAA
AGGTTTTCATATTCATCAGACATAATGAATTTCAAGGAGCCGCTAGTGAATTTTTTAAAA
TGCGTCTTGAATAACATAAACTCGGCATTTTCGCATAGGATTGATCAATTGCAATTGCAG
CTGTTGCGGGAAACAAATATCTTAAGGGTTTTGAACAGGGGAATAGAGAGACTGTTTAGC
GAGAATCCAAGGACTCATTCTGTTTCCCGTATCGTGGTGGAAAAAGATGTGGGCTGCAGA
ATTGGACGATGTGTGGAAGGTTCTAAATATGAACTGGTAGAGTCCAGGGCGAAAGAAATA
CAAATATATTATGAAAGGATGGTTTTTGAAATAACACAAGAATTGAAAGGGGACAAGCGG
GTGTTTGCCTTGATTGCAAATCTTTCCCAAAGATATAGCGCAGAGAGGAAAGAAATACGA
AATGTAAAGGTGCATGGTGGGCGGCCATGTAATGAGAACGAATTCCAGGTGATTCCGATA
AGATTCAAACCTATTAATTTGGAAAGAAGAGCACGACTGATAAGAAAGAAGAAGACTATT
AATTAAAAAACTTACATACAAATACATGCCTTACTTTCGATGCCAGCATCTGGAAAGGGA
AAGGCAGGGGCAGAGGGACATATTACTTATCTATTTATGCATAATTTGTGTTATATATTG
GTATGATAACTTGATGTTAGAGAATGTGCTATTCTGTTTCTTGAAAATCTGAGTTAACGT
TGATACCGCTTTGATACAGCGGGTGTGACAGGTTTATCTGTGACGGTGACAGGGGCAGTA
GAAATACTGGAAGCCGCAAAGGCAGAGGATACTGTGAGTGGTGGTGCCCACAACGTGGAT
GGTCTCAGTTTGACCCTAGGACTTGCAGAAGATCCTGTGGGAAAATCCGGGGAAGGCGGA
TGGCTACTTGGGTTGAGCATTACTCTCTTTGTGAAAAGGGAGGGAGGGAGAAGTTTGGGG
ATGAGATGGTTGCTCTTATAACATAAGGTAAATAAAAATTTGGGGTGACCCCGCCGTGTG
CGTTTGCTGGGACAAAAGAACAAGAATAGGAACATGAAAAGATTTGAATGATATGGATAT
GTACAAATGAGCTCTTCCATGTTTGTAGCATCAGCAACGTAGCTCTAGGAAATATGTCTG
AATTAACAGAGGCGGAAAAGCGCAGGTTACTAAGGGAAAGGAGACAGAAGAAGTTTAGCA
ATGGAGGTGCCAGCTCCAGGCTTAATAAAATCACCGGGCAGGCAAGCAGTCATTTGAACG
CAGAATCACCTTTAGACGCTCCTAGCGCTGCAAAGACCACACCACCTGCCAGTGTGCATT
CGGCTACTCCAGATATCAAAGAAGATAGCAACGTAGCGCCCCAATTGGACCTATTGAAAC
AGCTCGCTGCCATGCAAGGCCAAGGTACGGGTAAAAGTACCCCTCAGGACTCCTCTACGC
CCGATCTACTCTCACTACTAAGTTCTATGAATACTGGCATGCCCAGTGCAGAGGGTACAC
CATCGTTTGGTCAAGCGGCTCCTGCAGCCCCGATCAATCAAGCTGCTTTGGACTACCATG
ATTACTTGCTGAACAGACTGAAAGCCTGGACCATTCTTGTGAAGTGGGTCTTTTTCCTAC
TACCCTATCTATACCTAATCACAAGACCAAATTCCTCTGTGTGGCCGGCCTATGCATTTA
CTCAATCAGCTTGGTTTGCACCTTTGCGGAACCCATCGAATTTCACTAGAATTTTTGCCA
CGTTTGAGTTCCTTTCCATATCCATCTACTACCAGCTATTGAAGAATGTGGAACACAAGA
GCAAGATTAAAAATTTACAAGATACCAATAAACTTGTCAAGTTAGTTTCACTGGTGCCCG
AGGGAGTAATTCCCGTCGCCAACCTGAAGGGGAAGCTAATTACCCTTTTGCAATACTGGG
ATCTATTGTCCATGCTAATCACTGACATTTCGTTTGTGCTAATTGTCTTAGGCTTATTGA
CGTACTTATAAATTCTAGATAGTTCAGTAATATAATACATTGTTCTCATAACCCGACATT
ATTCCCGGCTTTCTTTTCAGGTAATTGAAAAAAAGAAGAAAAACGGTAAGAAAATTTTCT
AAGCGATGAGTTCGTGAAAAATCGATGTATAGAACTGAATTGGAGTTCAATAGTAAAAAA
AAATCCATATATAGCATTAAAAACTCAGTATCCTAGCTTTAAGAAACTGAACCAGATTCC
AACGACACAATGGGTCACAAGAAGAACGGTCACAGACGCCAGATAAAAGAAAGAGAAAAC
CAGAATAAATTTGAACGTTCCACATATACTAATAATGCTAAAAATAATCATACTCAAACA
AAGGATAAAAAACTAAGAGCAGGCTTGAAAAAAATAGACGAGCAATATAAAAAGGCGGTA
TCTTCTGCTGCGGCAACAGATTACCTTTTACCCGAGTCCAATGGTTATTTGGAACCTGAG
AATGAGCTAGAAAAGACTTTCAAAGTGCAACAATCGGAAATCAAATCGAGTGTGGATGTC
AGTACTGCAAACAAAGCTTTGGATTTATCTTTGAAGGAATTCGGCCCTTATCATATAAAA
TATGCAAAAAACGGTACGCATCTTTTGATTACTGGCCGCAAAGGTCACGTAGCATCTATG
GACTGGAGAAAGGGACAACTTCGTGCTGAGCTGTTTTTGAATGAAACCTGTCACTCAGCG
ACATATTTGCAAAACGAACAATACTTTGCTGTAGCGCAAAAAAAATATACATTTATTTAT
GATCACGAAGGTACAGAATTACATCGTTTGAAACAACATATTGAGGCAAGACATTTAGAT
TTTCTACCATATCATTACCTGCTCGTAACTGCCGGTGAGACAGGTTGGTTGAAGTACCAC
GATGTTTCCACTGGCCAGTTGGTCTCGGAATTGAGGACCAAAGCTGGGCCAACTATGGCA
ATGGCACAAAACCCATGGAATGCTGTGATGCATCTAGGTCATTCAAACGGTACAGTATCC
CTCTGGTCACCATCCATGCCTGAACCATTAGTAAAATTACTTTCTGCCAGAGGACCAGTG
AACAGCATTGCTATCGATAGAAGCGGGTATTACATGGCAACCACAGGGGCTGATAGGTCG
ATGAAAATTTGGGATATCAGAAACTTCAAGCAACTACATTCTGTGGAAAGCTTACCGACG
CCAGGAACAAACGTTTCCATTTCAGATACTGGTCTATTGGCATTATCTAGGGGCCCTCAC
GTTACGTTGTGGAAGGACGCTTTAAAATTAAGTGGAGACAGTAAACCGTGCTTCGGGTCC
ATGGGAGGGAACCCACATAGAAACACCCCTTACATGTCACATTTGTTTGCCGGAAACAAA
GTAGAAAATTTGGGATTCGTACCATTTGAAGATTTACTAGGTGTAGGCCATCAAACGGGT
ATTACGAATTTGATTGTACCTGGTGCAGGTGAAGCCAATTACGATGCCTTAGAATTAAAC
CCATTCGAAACCAAAAAACAAAGACAGGAACAGGAAGTCAGAACCCTATTGAACAAACTG
CCAGCAGATACAATTACTTTAGATCCGAATTCCATCGGTTCAGTGGATAAAAGGTCTTCT
ACCATAAGGTTAAACGCTAAGGATTTGGCGCAAACTACAATGGATGCTAATAATAAAGCC
AAAACCAACAGCGACATTCCAGATGTAAAACCTGATGTGAAAGGTAAGAATTCGGGTTTG
CGTTCCTTTTTGCGTAAAAAGACTCAAAACGTTATTGATGAAAGAAAATTAAGAGTACAG
AAACAACTGGATAAGGAGAAAAATATTCGTAAAAGAAACCACCAAATCAAACAAGGCCTA
ATTTCAGAAGACCACAAGGATGTCATCGAAGAGGCATTGAGCAGATTCGGCTAAATCGAA
ATATCTTTAAAAAAAAAACTTAAATGATTATGTATGTATATATAAAATAGATAATCATTA
TTATTGCCTCAAGCATTCTTCTATCCATTTTTTTTTTTGGTTCTTTTTAATATTTTATAG
GAAACTTTTAATCATGTTCAAAAAGTTGACAGTATGAGAATCGATTGCATATTAATATAG
CAATCTAATTGAGATCTTAGCAGAGGTTTGATTTAGTTGTTCATAAATATCTTTAATATC
GCTTTGGTCAACAGAAGAGATATCAGCCATTAAATAAGCAATTTCACCATTTGAATCGGA
AAATTGCTTTTCGATGTTATGGTTCGATAAAATATCATTGACGGTCTTCAAAACACCTGG
TACATTTTGGTGAATGTATAACACACGCACAGTGTTCTCTTGGTCGTAAGACAATGATTT
CAATGCCACTTCTGGGAAGTTGACTGAACCGACAGAGTTACCTTCATTGATGTATTTGGA
CAATGCGGTAGCCACTTCAATACCGATTGAGCTTTGGGCTTCTTCGGTAGAGCCACCAAT
GTGTGGTGTCAAGATGATATTTGGTAATGAAACTAATTCAGAAGTCCAGCTATTTAGCTC
ATCGTTAAATGAACCTTCACCGTTCTTAGCTGGTTCATGTGGATAAACATCCAAAGCAGC
ACCTGCAATTTTGTTGGCTTTCACGGCTTGGATCAAAGATGGAATGTCCACGACAGTACC
TCTTGAAGCATTAATAACATAAGCGCCATCCTTCATAGCAGCAAATTGTGGGGCAGATAA
CATTTTTTCAGTTTCAGGAGTAGCTGGTACATGTAGTGTCACAAAATCAGATTTATTCAA
CAATTCATCTAATGTAGAAACTTGTCTGGCAGTACCCAAGGCCATGATAGTTACAATATC
GTAGTACAACACATGCAAACCCATAGCTTCTGCAAGAACTGATAATTGGGAACCAATGTG
ACCGTACCCAATAATACCAAGAGTTTTTCCTCTTACCTCCCAACATCTAGCAGCAACCTT
ATTCCATGTACCGGTATGTAATTCGATAGATCTATCACCTAGTTGTCTTGCTAAACTAAT
GATTTCAGCGATGACCAATTCTGCTACTGATCTTGAGTTGGAGAAAGGCGAGTTGAAAAC
AGCAATACCTCTGCTGGTAGCGTAGTCTAAGTCAACTTGGTTGGTACCGATACAGAAACA
ACCAATACAAACCAGATTCTTCGCATGTTGTAAGACATTTGAAGTTAATCTAGTCTTTGA
TCTGATACCAATAGCATGAACGTCCTTGATCTTTTCGATCAACTCTTCCTCGGGCAATGA
AGATTTATAGAATTCGACTTGGTAACCTTGCTCTTCGAAGATTGTAATAGCAGTTTGATT
AACGTTTTCTAATAGTAAAATCTTCATATCACCCGTTGAGAAAGGCTTCAAAATTTTTGG
GTGCTTTACAGCATTCAAGCGCTGTGGAACGGTATTCATGAAAGATTGCGTAGGTGAAGT
ACAAACAGCGCCTGGGGAGCCGCTCATATTCATAGCTTGTTGAAAGGTATTTTGTAAGTT
GTTAATGTCAATGCTTGTCATTGCTGTCGATTTTTCTGTGGTTCTTTATAGAGTTCTGTA
TTTTTACTAAGATAGTTGTCAAGTATCAAAAAGTGAAATAACTAGAAATGGTTCTTCCTT
TATATACATAACAGTTTTAAGAATTTCCTTATGCTCTGCTCCCTCCTTCCAACAAAGTAA
TTACTCATAACTTGGATATTTGTCTGATTTTTTCATCCCGCTCAGAAAACCCTGCACGGG
CAGCGTTGCATTTTCTTAATTTTTTTCTCGTGGTAGAAGTCAAGGACAATAAATTGCGAA
ATTAGGTGGGAACGAGAAGAATAATTAAAGTGCTGAGACCGAAGTTGTTCCCCTTGAATT
CCATTTGTGAGTAAATATCGAAAATGGGTCCACAAAAAAAAATTAGGTTTTTCTAAAATA
TTAGGTCCAGCCTAACTGCTTAACCAAATTTTTAATTTGTGATATTTGCACATAGCTTGG
CCAAACAAAGGCATTACTCGATTGTGAGTAAAAAACTAAAACAATGTAGATAATCAGGAT
TAAACAATGGCATTTCTATGGATTTGTTGTTCTCTTTATATATTTGAGGAAAATTCAAAG
ATAATGGGGAGAAAGGTGGAGATGTATCTCCACCTATCGTAAATTTGAAAGTTCCGCTTT
TCCGTCAATTGCACCCAAACATCACGCAACGCTTTTTAAAACGTTATCAATATATCCAAT
CCAGCATTGTTAAGTTGATTAGTAAATGGAAGAGATTCCATTGTGTACAAAAAAGGGTTT
TAACTTGATTATTTTGTTATAACGTTATATACAGTTGAATGAGGTAAAGAAAACAAAAAA
ATATTTCATTTTTAGTATAGATTATTTGGTAGCTTCAGGTTGCTTCACGGTGTAGTCTCC
GTTCTCTTGCTTAACAATACTGCCGGAATTTAATAGTTGATCAAACATATCTTGAGGAAT
CCACCCTTGAGTGGCAGCAAATGGTGTAGAGATTAGCTTTTCGTGTAATTTTTGCAAATC
CTCAACATGTCTTTCAATATCTTCTTTACTATAGTTTAGAGGAAACTTTTTCTGATTCAC
TAAATCATTCTGGGCAAAGATGTCCCAAACTTCCTTCAATTGCAATAGTGATTCATCAAT
AAGTAAATACTCTTCTTCCGTTTTTCTTTCGACAGCTGCAATATATGGGCTTCTCAGTAG
CTTAACAGGTGGGGCAACTGCAGTAATTAATTTAGGATTATTGTCATTTAATTTTTTCTC
CCATTGATGTTGATTACGGGTGCGCTTGTACATGAACTGATATTGCGCCTTTTCCGCCTC
AGATAATTTGTCAAAATCGGTTATGTCCTCCTTTAAGTCATAAATCTTGGGCCCATCATA
GGCGATGAATTGTGGCGAATTCTGTAAAATGAAAGGTTTTGTGCATGCTCCTTCAAAATC
TAATAGATAGGCTTCTTGTGCTTCTTTGTTAACAATAATATTCATGGGGTCTAGATCAGG
ATGAAACAAACGTGGTGACAATAGTTCCTGCATATTTGGAATGGCCTTTGTTTTGACGTT
GAATAAATCCGGGGCAATCTTAGCTAAATTTTCATAGGTAGTTATTTGCTCCTTCAAAGT
TCGAGGATACATCAATTCAGCTGAACTTCCTGCCTCTTTCATGGCTATTCTAGTTTTAGC
ATTTTCAGCTTCCAATAGGCCAGTATTTTTAATTATATCCATTGGAGACTTCTTTGGCCA
TGGTCCCAAAAAAGGTTTCATTTGTTTATGAAAATCCAAGTGAGATTTATGTCTCCAGAG
ACATCTTTCCACGGATGGCCCAATTTTCCATCTGTTTTGTAGATCCGGATTAGTTTCCCC
ATCGTATATGTCTTCCTTAACAAACTCCTTCTCATTTCCGTCTTTTAAGTCATTGTTAAA
ATATATGGATCCAAATGCATTTAATTTCAATGACACTAACTTCGACTGAAAATCAGAAAC
TTGTTTAATAACATTGTCATATTTTTTTTGATTGGAGGAACCGTCTTCAATCAATGGATC
CCAATCTTTCATCAAGAGTTCTCCTTCGATAAATTCTTGTAAGACAAAAGGCTGCCTTAC
AGGGTTCAAAGAATTGACACCATAACAAAAAATCTTGGGAACTTTGATGCCCAACTTCAA
GTCAGCAAAATCCATGGTTGCTACTTCACTTCTTATTCTGTAGGATAGAGTGTTTTCATT
TTCCAGCGGATAAGGAATCCTCAAGATAAATGCCTTGTTCAAATTCGTGTCGACCTTGTA
TATTCTGTGATGTTTACCTTCGTGAATACTAGATAATGTGGTTACTTGAACTTTTTCATT
TGGGTTGATTTTACCTATATTCTTTGGTACAACGTTATTGACCAATGAAACGGTCAAGTT
CTTGTTAAACACTGGTGGTAAGATCTTACCGTCGGGGGCCTTAGCCATTTCATTAGATTG
AATGTAGATGTCATTGAGAATGCGATTTAAACCTTCAATCGAAAACTTCGTGAATCTTTT
TTCCTTTTCTTGCTTATCATTTTTAAGCCATGAGCCCCACGTATATTTGAAAAAGGCATC
TCTCTTTGGATCATTGTCATTCGTTAGCTTGGTAAAAACTTCGTTTGGCTTATTGGAGAT
AAATCTCTTGGTGGCGGCGACGGTGATACATTTAATTGCACCCACTCTTTTCGAAGCTCC
TACTACACACCTTCTGGAATGGCCAGCAACAGTGTACCTAATCATGCTTGGTCTTCGTAT
TGCTGTCTTGCTTGCTAAACAGCTTTTGCTACTTCTTCTTCGCTGATGACAAAAGGGAGT
CTACTAAATACAGTTCGGCTTAAAGTGTCGCTGGTCAGCAATCGGCCCGAAAATACATTG
AACATTTGAAATTACCATGTTTCAAAACGAATATTTATTATAATTATTACTAGTAAAAGT
TATACATAAGAAGGGAATAATACAAAGAAACGGGAAACAGCTAAATGTAGTATATAGCCG
AAAGATGTGGACATATCCCAACAAATCGTCTTATGAGATCCTTTTTTTGTTTTATATTTT
TTTTTTAGCAGGTATAAACGTATCATTTATATATTTTATTCTTTCCTTTAACTCTCAAAA
TTTGAGCAATTAGGTTACTGTGGTTCACGTGATTCAAGTGTGCACATTGCTGCTATGCTT
TGTAGTATTATCCATAGAGTTCAGGGAGGGGGAATGGTCGGAGAGTGGGTAATTTGCATT
GTCTAATGGAGCAGAATCAGCGTTACTTTTCTGGAAATAAAACTGGTCCGATAACGAAGT
AGTAGAATCAGAGGTGAGATTGGAGTTGGAAGTGGTGTTGAGTTTGTAAAACTTTTCGGT
TTGATCATGCGATACCTTGTATTTGTCATCCTTGTCATTCTTCTTTTTTTTGTTCTTCTT
TTTGTTCTTAGGGTCTACCATATTGCTAGTCTTCGGGGTAGGAGACTTTGTTCCATTATT
GTGATCATATTGTTTTCGAACCATGGAATTCAATAAATTAAGTGAATATTTCGGAATCCC
ATCTCTTTTGACATTAATCCCCTGAATACCATCCTTCGTGGCAATCATGGAGGCACCTGA
TGTGATGGAGCAACCTGAGTTCGTTCTCGTTATCCTATCTTCACCAGAGGCAATATTGGA
AGGGCTCATTGATCTCTGATCTAAGTCCAGGTTAGTAGACCTGTTATTAGTGTAAATGGA
CTGATCATAGAGAGAGATGGCAGATGCAACATCTTTTGAGCTTATTGAATGTGATGAATC
AGGCATTATTAACTATTCGCTTCCTTTTCTTATCTCAGCAGTTTGTGTTTTTTATTCTTA
TTGTTATTATCCCTTTTAACTATATATGCATAAGCTAAGTTAAATATTAAAATATTTATA
TATAAACGTTACAGGGCGTGTGAACACGTTTGAAAAAATGCTGGAAGGTAATGGTAGATA
TAAGAATTGGAATAACAGGTTGATAGAGAATCGCCAAGCTAGAGAGTTCTGACAAGCGGC
AAGGGGGAAGGATGAGACGCAGATACGAAAGCCGCACCATTAAACCGTAAAGAGAGAAAA
ATAAAGAATGACTTATTTCTCGGAAAGGCCAAATGCAATTATGCAACACGCACACATTCA
CACTCACACTCACACATAAACTTTGACTGAAACCAAAACTGTTGTGAGTAATAGCCTTTC
TTGTTCATAAAATAGTACAAGATACAGTAAATATATATCAACTCACCTGGTATAGGGATC
ACTTACTGCACTGCAAAAGTGGATCGTTTGCGCAAGAAACTCCACCAATTCTAAAGAATA
TAATAGAAAAAGCTAATAGGAAAAGTGGTCATTTTCTGTTGATATGTTAAATAGGATAAA
CCCAGTACGGTTTTCTGTGCAATCTTGCCAAAGATACTTCTCGAGGTTGGTATCGCCATT
GGAACAGCATAAAAGTAATACTTTTACTAATAGAGTCAGAATCCCCATTGAGGCAGGCCA
ACCACTGCATGAGACAAGGCCGTTCCTTATAAAGTCGGGCGAGTTGACACCAGGCATTTC
AGCCTTGGAATACTATGAAAGAAGAATTAGGTTGGCGGAAACATTGCCTCCCAAAAGTTG
TGTGATTTTAGCTGGTAACGATATCCAATTTGCATCTGGAGCAGTATTTTATCCGTTCCA
ACAGGAAAATGACCTGTTTTATCTTAGTGGTTGGAATGAACCTAATTCGGTCATGATTTT
AGAAAAGCCAACGGATAGTTTAAGTGATACGATTTTCCACATGCTGGTTCCGCCAAAGGA
TGCGTTTGCTGAAAAGTGGGAAGGATTTAGGTCTGGGGTTTATGGTGTTCAAGAAATTTT
CAATGCCGATGAATCTGCTTCCATTAACGATTTGTCTAAATATTTGCCCAAAATAATTAA
CAGGAATGAGTTTATCTATTTTGATATGCTATCAACTTCTAATCCGAGTTCGTCCAATTT
TAAACACATCAAGAGCCTGTTAGATGGCAGTGGGAATAGCAATCGATCATTGAATTCCAT
TGCGAATAAGACCATCAAACCCATCAGTAAAAGAATTGCAGAGTTCCGTAAGATCAAGTC
CCCTCAAGAGTTGAGAATTATGAGGAGAGCTGGCCAAATATCAGGAAGATCCTTCAATCA
AGCCTTTGCTAAAAGATTTAGGAATGAGAGAACTTTAGATTCCTTTCTTCATTACAAGTT
TATATCCGGTGGTTGCGATAAGGACGCATATATCCCCGTGGTCGCTACTGGTTCGAATTC
TTTGTGTATTCATTACACAAGAAACGATGATGTGATGTTTGACGACGAAATGGTTCTTGT
AGACGCCGCTGGCTCCTTGGGTGGTTATTGTGCTGATATTTCGAGAACGTGGCCCAATAG
TGGGAAATTCACTGATGCACAAAGAGATCTCTACGAAGCTGTATTAAATGTTCAGCGTGA
TTGCATTAAGTTATGTAAAGCTAGCAATAACTATTCCCTCCACGACATCCATGAAAAGAG
TATCACACTCATGAAACAGGAATTGAAAAACTTGGGCATAGATAAAGTCTCCGGTTGGAA
TGTTGAAAAATTGTATCCGCACTATATTGGACACAATTTAGGTCTAGATGTTCACGATGT
GCCTAAAGTTTCCAGGTACGAACCACTAAAGGTTGGACAAGTTATTACTATTGAACCGGG
TTTATATATTCCTAACGAGGAATCATTTCCATCTTACTTTAGAAACGTCGGAATAAGAAT
TGAAGATGACATAGCCATTGGTGAAGATACTTACACTAATTTAACTGTTGAAGCAGTGAA
AGAAATTGACGATTTAGAAAATGTCATGCAAAATGGCTTATCTACAAAATTCGAGGAGGA
CCAAGTGGCACCACTGTAATGTTATTGCTAAATTGAGTACACCCTGTATATACAGATACA
TAACTTATCGATTTAAGGTCTTTTAATATTAAACGGAAAATTCAAAAAAAAAAATTTACT
GAAAATATCTTGAGATACTTTTGTTCAGCTTTCTTTTTGTTTTTTTCCTCTTCTTCTTGG
GCACTGCTCTTTAGTTTTTATTTTTAGTTACGGCAAAATAAAGATGGGTCTAAAAATTAC
AAAAGGACAGCTGAGAACCAAGGATCTGAATCAATCATCCTCAAAGTCATCGCAGTCTTC
AAGAATAGGTGTAGACACTTGTATATTTACTAGAATGCTACCCCGAATAAACACTGCAAT
TAATCTCACAGAGCATCTGCTGAGAAGATCTTTTCATTCACTGACAAATCTACAGAAAAC
TCAAGTAAAAGAAAGACTACATGAGCTAGAACGTCACGGTTTCATATTAAATAAAACATC
CAAACAATTGGAAAGGATAAATTCTAAGAAAAGAAGACAATTGAAAAAACTGCAAAAGAC
AGCATACCCCAAGGATCAAGCTTTTCATATTCTTCGAAAATTTCATAAAATAAATAATGA
GGCATTAGCAGATACAAAACTGGGGCCAACTAGCCAAAGCGACTTGAAGGTCCTATCCTT
AACCAAAGATAAGAGACTCTTTTATACCATACTAGGCGTCAATGGAGAACAGTTACGTGA
TTCCAAATTAATCGCCAATGATGTTCAAAAATTTTTGAAAAGAGGACAACTGGAAAAAGC
TGTCTTTTTGGCTAGGCTAGCTAAAAAGAAAGGCGTCGTTGGGATGAATTTGATTATGAA
ATATTATTTCGAAGTTGTGCAGTCCCAACAAAGTGCTGTAGATATCTTCAATTGGCGAAA
AAAATGGGGAGTCCCTATTGATCAACATTCCATCACAATCCTCTTTAATGGGCTCTCAAA
ACAAGAAAATTTGGTCTCAAAAAAATACGGAGAACTTGTTTTGAAGACTATAGATAGTTT
GTGTGACAAAAATGAGCTCACGGAAATAGAATATAATACCGCTTTGGCGGCACTGATAAA
TTGTACCGATGAAACACTAGTGTTCAAACTTCTTAATAAAAAGTGCCCAGGTTTGAAAAA
GGATAGTATTACATATACCTTAATGATAAGATCTTGTACCAGGATTGCCGATGAGAAACG
TTTTATGGTGGTACTCAATGATTTGATGAATAAAATACCAGACTATTGTGTCGATTCTAA
ATTGTTATTTGAGTACTGTGAAGTAATATGTAGCCAGAAGTCACCAAAGATTGAGAAGCA
AGGAATGGGACTATGGGCCCTCTGTGAATATTTTCAATTTGATAAGACCATTTTCAAGAA
GTATTTGACACAAAGCGATTTTCCTACGTTAGTTCCACTAAGTCATTGGAACATCAATAA
GCCATTTCCTCTCAACAAACATGTTGTGGGATTGTTTATGAATTACTGTTTGAAAAACAA
GGAATATGATCTTGCTATGGAAATATTTAAGACATTAGAGGCACAGAACAACCAAATGTT
AGATCAGAGCATATACCACAAATACATGGAAACTGTCATAACAACGAGGCCCATCACTTG
CGGCGACGAGTGTCTGGACATTTATGAACGGGTAGCCTCGTCGGCACAAATCTCAATAAC
CAGGAGGATGTTAATTTTGGTGTACAACGCATTCCAAAGACAAAGTCTCAAGGCCGTTAT
AAACAAAGATGCATCAAATGCTGAAGCTACTTTGCACAAGATTCGGGGGTTTATAGATAG
CGTAGAGGCCACATACTCATCAAAGTTGAACGGCAAAGTTTACAGGTTTAATTCATGGAA
GTTCCTGTTTCCTATCGTTAAAAATCTGAACATGAATGATAAAGTGTCTACAGTGGAACT
GAAAAGTATACTAGATGAATACTTGAAATCTTTATTGAATGGTGAGCTCGGGAAGGAATT
TAAAGCGAGCATAGAAGACAAGCGGTTTGTTACGTTGGAGGGAATTCGTTTAGTCAAGGT
TTTAACCGAGAGAATCAAGCTTCCGTCACTGGACAGTGAGGAAATAGCCAGTTTAAAAGG
CACGGAAAGAAAGAAGTTTCTTGCCAGAAGGCACCTTTTGAGGCTGAAGCAAATATTACT
GGAAGATTTAGCGGACATTGAAGGCAACTCAAGAAGGAAGGGTGATAGCGAAAATACAAG
TACCAGTGAAGAGCGCATCATGGAGGACTTGGCCGAGCTGATACTTGAAACCAGCTATGA
CAAGTTTTAAGTAAAAATTGATTATTTACTCCTTTCAATATGTACATAGTTTTGAGGTTT
TTTCAAATTTTTTTCCTATTTTTTTTGTTAATTGAAAGTTACTGATGATAAATTATTCAA
AGGTGGTGTTAATTAAGAATGAAAGTACATCTTCCTATACTATGAAGGAGAGGTTCATAT
AACACGCGCAATTGGCACGTCTTAAGTATCATCAGTACAATATAGTGGTATGTCAGGTAA
ATATAACATGTTCAGTGTAACAACTCATATTTTCCACGTATATATTGGATCTGTAACTCA
ATTGCGTCATTGTCTACATATTGCTTTTAACAGTTTCATTATTCTGTTACTGTTGCAATT
ATATATAAGCGTATAAGAGATGTGCCTAAGTATACGATGAGAACGCACATAATGTTATTA
TATCAACTCGCCTGTATATTTTTGTACTACTTGTTCCAACACGAAAATAAACCAAAGTAA
GAAGGGTTAGCACCTTTTTTTGCAAGAGAAATCGCTCTTCAACTATTTTAAGTCAATCCT
ATGAAAAAGGGTTTGCGCCAGATTTCCAGGGACAAAAAAGAAAGTTTTATGTAAGACTAG
ATTGTGTTGATATCTCGAGCAAACTGTTAACCATTTTAAACCAATATAGTAATAAGTGTG
AATAATCGTTCATCTCTAAACAATATGTAAATAATTCTAAAGAACAAAATATTTTGTCAT
TATCATCAACCTGTGAGCACTGAAAAAAAATTAATTCTAAAATGGTGCTCCATTTGCAAA
TATTCTTTCTATTTCCCTGACTCCCGCTAATCGGTTTTATTAGTGAAGAATACAGCCGTG
GATTGAAAAACAAACTGGTTCAAGTCATTAACTGAAGTAATGCGACCACATCTTATACAA
GAGGCAATGCTTTCTAACAGTTTTACATTATTCAAAATCTTCACATAGCCGTAACTTAAC
TTATATAATAACCGCATATTGGGCTCTTCTGAAAGAACTATTATAAGAAAGATACAAAAG
CAAGCAATCAATCCAAGGGAGAAAAATGACCTCAGGATACTATACCGTCTCATTTTTTTA
TGCGATCTTATTGTTATGCGCATGCACACGTGCTGAGATCTACCTGACGGGCGGTGAAAG
CCAGGGCTTGCCATCAGGATTCTGGCAAATGGACGATGATTTGGCAATCGCTCCAGTTTC
TATGGTTGAATTTTACCAGACGATAGGATTAACTGCAAATGGTACTGTACCTGAGTCCTT
CAACAAGCGTGATGCTACTGAATACCCTAACATTATCAGTAATATAACTACCCAAGCAGC
CAACTTCACTCAGCATATTCTCGTCGAGCAACTTCAAAATGACGTCACGGCAATAAGTAT
CAGTAATGCCATTAATGTAGCCGTCGATGGTTCTGTGGAAACACCAGCAGACCTGCAATA
CAACCGCAACCAGGAAACAGGTGAATCTACCCTCTGTAGAGCCAAGTTTTACGGAGTGGA
GGTAAGAACTTGGTCTAGGTTGTACAATAGGGCCGTCTCTTCCACAACTCTTACGACTAA
TTTGAACAGCTACATAGCGCAATGGGTAGCATGGGCCGTTCACGGGAGCGGTGACAAGAA
GTTTTGCGGCAGCCAGGAGTTCACGAATATCTTTTTTGATGGGCAAGAGGGTTGGAGTTT
GTTTGTCAAGACGTGGTCAACAAACAGTAGCTGTGATATTACAGCCTCTGAAGGAAATTT
AACATGTGCTGTTCGTGTTTCAATATCCAGTATGCACAATCACGGCAAGACAGCGTTTTG
TGTTACCTATAGCCACGGTGATTCTTGGCGTGCCGAGCTGAGAGTAGTTGCCAATGATGC
TTGGTCTCATTATTATCCCTGGAGTATTGACTGTCCAGAAGTTGATAAAAATAATATGGC
TATTAATGATTGTTTTGATCAGGCGCAAGGTTAACGATTGAGTTTCCCATAATTTTTACC
GCTCTCCTCTTGGTTGAGACGTATGCGAAAAGCTAATTCGACGTTTTTTATTGTAAAATC
GTACACTTTTGCAGGCAATTCTACATATTATATAAGATCTAAGTCGGATCTTGAGACTTT
TGGTGAACTTTGAGATGATTGTTGGGATTCCGTTGTTGATAAAGGCAATAATATTATGTA
TACAGAATATACTAGAAGTTCTCCTCGAGGATATTAGAATCCTTACAATGGACTTGATAT
TTCTACATAAAAATATTACGATTATTCCTCATTCTGTTTTTTATGTTTCACCATCCAACA
GATCTAAACTCATTTCTTCAGGTATTTATAACTTTGATTGGTTCATCTTAGGCATACTCA
ATCTTACCTTTTTCATGCGTGTAGGAACGAAACTCTAAAATCATCTACGGGTTAAAATTG
CTTATACGGAGGTACCCCGTGTTGAGATCCAACACATACAGAAATTCTGGGCACATGGCG
CAGTTGGTAGCGCGCTTCCCTTGCAAGGAAGAGGTCATCGGTTCGATTCCGGTTGCGTCC
AATGAAATCTTTTTGTACCAAGTTTTTCTCTGTTTTTGTTAGACCGCAAGCGAGTTTACC
GAATCACAGCCCACCTCACCCCACAGGAAAACAGCAGCAGAACGGCTGCTAAATGACTAT
TAACAATAAGAGGTTTTCGGCTACTTTCGCTGCTTGCTCGTTAAATCCGTTCACTGGTAG
CGAACCCCAACGACAGATGTCTATGTATGCTATACGTAAAATCACCCCCATTATGGCCAT
TTTATGTGTCGCCACTGCTACACACCCACCGATGTGTATGTACTTCTAATATCTAACCAG
ACCAGACCCCACGCTTTTTCTGGCATCTCCTGCTGCCATCTTGGTGTAGTGAGCGGAAAC
TTTAAACATTAAACAGAATGGCGGCGACTTTGAGATTTGGGCCCGCTGACGCTGAACGAA
AAGAAAAGACCTTCATGAAAAAAATATTTTGCGGCAAAACGTCATCGGAGAACACAGCGC
AGCGAGAATGTGGTGTTAGCCAGACCCAGCAGTTTGCGCACCTGGCATGGATGGATGCAG
ATAGGTAGTGTTCGATGCGCAAGAGTCCAATCTTCTCCTCGCCATTTGCACCGGCGGATG
TAACACTATATTTTCATTGACCTTAGCGGTTTTCTTTCTTTGACATGTAACATCATCACT
TCAAGCACAAACAAAGAACTGTATACACAGACCACAAACTTGCATATCATTCTAACATCG
GTGTTATAATAGCGTAGGTGCTCTTATCACTGCAAAGTTCATAGAAAATCCGTATTGTAT
CTCCCTTCTCCATCAGCAACACAGATCTACTTATCATATAGAACATGAAGGACAGTGTAG
ACTGCCCAAGCATTCTACCCACCGACCGCACTTCAGTGCTTTCCGAGACTAGCACTTTGG
TCGGATCGAGTTCGCATGTATATTCGAGGCATGCTCCTATGAACAGTTATCATAACAGCA
TGAACAGCAACATATACCACAGCCCCAAAGCCAGTAGCCCTTTGGTGAGCTATAAGACAT
CTTCGCCGGTGTTATTGAAGAGGGCGACCGCTCCTGTCCTGCCAAGCTTCAAGCCCAAGG
AACAGCGATATAATAAGCCGCAGGGTTGTTCGCTAATTACTGCTGTAGAACTGGGCAAGA
TTATTGAAACCTTACCAGATGAAAAGGTGCTCTTACTTGATGTTAGGCCGTTTACCGAAC
ATGCCAAATCCATTATCACAAACTCCATTCATGTATGTTTGCCTTCCACGCTGCTGAGGA
GGAAAAATTTCACCTTTTCCAAACTCTTGGACAACTTAACTCCTAGCGAGCAAAGCGTGT
TGAAATCTAAACTGGCCATCGATAACCTTCGGATTATCATTTATGATAGCACCGCAAATC
AAACGGAAAGTTCTGTTTCTTTACCTTGTTATGGAATAGCGTCCAAGCTAATAGAGTTTG
ATACTAATGTTAAAAAAACCGTGTCTATACTAATGTGTGGTTTTCCTCAATTCAAAATTC
TATTTCCAGACCATATAAACACCAACACATTTAACTCAGATTGCATTAGTTCGGCTGAAC
CTAAAAGCCCCAAGACAAACCTTATGAACAGTCTACACAACACAGCGCCGCATATGACGG
CGACAACACCACTATCGTCTCCGCAAATGAACCTTAAGTTGAAAGTTCCTGACGATAGTA
GGTCAGATCATTCAAACTTTTCCAGTTCTCCCTCTCCGCGTAACGTCCTATCAGATTCTC
CCATGTCTTCTTCTTCCCCCATATCTGCCTTATTTAAGTTCCAGCTGCCTGCACCACAAA
CAAACATAAACCAAATGTTCAAATTTTCGCAAAATGAAGAAATAATGGCTTTAGAGACGT
ATTTGAGTGCAGTCAACATCAAAGAAGAACATGAAAGATGGTATAATAACGATTCTGCCA
AAAAATCTTTACAAAACTTCCAATTCCCAAAGAACCAAAATTCTCTAGAAAAGGACACTA
ATAAAGACAAACTAGGGTTTCAGATCAGATACGAAAACCTGAGCAAAAATTACGAAAAGG
AGGTCATTGACTCCGTTATACCTGAATGGTTCCAGCATCTGATGTCAATACCCAAGATCG
AGTTGGTTTCTCAGTTTCAAAAATTAGATTTTTTGGAAAAAAGGCGCTTGAACCATTCTG
TCTCTTTCAGGAAGAAGGAAAACTCGTTTATACTTGAAAAGCCATCATCATATCCTGAAC
AGTTAACATCAACTTCTTCTTCAACAATCATGCCTCCAAAATTTCCTGACGTGAACAAAG
TACAAAAGAGGTCGCATTCTCAGCCAATCTTCACTCAATACAGTAAATATAAATCGATGC
TCAGCCTTGAATCAGATTCCGATTCGGAGTCAGATGACGTTATAATATCATCAGGCGTTG
AATTAGGAGCCAAGAACAGGTACAAGGATATTTTTCCCTACGAGCATTCGAGAGTGATTC
TAAAAAAAGGTTTGCAATCATCAAAAGGTATCAAGCATTCACATTCTACTTCCGATGGTG
GCATCCTCGACAATTATATCAACGCAAACTATTTGTCTCTGCCAAGGTTTTCTGTAGAGC
AAAATTCGTCATTTCAAACAACTACAACCACAACAAGAAGAGTGCGCTATATAGCGACGC
AAGCTCCAATGCCCTCCACTGTACATGACTTTTATACATGCATATTGAATAATGGCGTTC
CGTTGGTTCTCTCATTGACAAATGATTTCGAAAATGGCATTGAGAAATGTTATCGATATT
GGCAAGAAGGTAATTATAACGGTATTCACGTTAAATTGTTAGAAAAAAAAATATTAAAGA
TGCCTAGCACTACTAGCATGAGGAAAAATACTATGGGAACACAAAATAGTAGTTTATATT
CAGCTGGTGTTCAGGGAAATAGTAGTAACTATAGTACTGATAATGATAATGATAATGACA
ACAATAATAATAACAATAACAATAGTAATATTGCTGTTACTGCTGCTGCTTGTGATGATG
ATGATGATGATGATGATGACGCAATTCTCATAAGAAAAATTCTGCTAACATATCATGATC
AAGAGAAACCTTATGAATTGTTACAGATTCAGGTGAAAAATTGGCCTGATTTGGGCACTT
TACTCAATCCTATCTCAATCTTACAAGCAATCAATGTCAAGAATCACATAATAGATACAC
TATTTGCCAGAAATTACTATCAAAACGACCAACTTCCTACCATTTTGGTTCATTGTTCCG
CAGGTTGTGGAAGGACTGGTACTTTGTGTACCATTGATTCCATTCTATCCAATTTCGAAA
TGTTTGAAATGTTGCAGAAAGAGTTTGTTAAATTAAAATACCCGGCAAAGTTATTCGATC
CAATTTCATGGACAATTAATATTTTTAGAAAGCAACGAATATCCATGGTCCAGAACATTA
ATCAATTTATTTTCATTTATGACTGCTTGCTATTTTACTTTAGATTACGTCTTGATGACA
TAACAGAGAGAACGGATGGTGATGGAAGTAACAAGGACAATATATCATTAAGTGCATTAA
TTGAACAAATCGAAAAATTAGAGATCTTGCAGACATTCGTGGATGATAAGTTGAAAGAAT
TGCCACAATAGTTAGGCTAATATGAATGTATTTGATCTCTATTTTATTAATACGAAACCC
CTTAATAATTGATATTTTCGATACATATTTGGCAGTAGTTAGCTACGTAACAGAGTATTA
TTTTCATTTCAAGTTATGCATGAACTCTCTAATTTCACATACCATGCTACCACTACCCTT
GGAGGTTTTGTTCATATCTTTTATAATAAAGCTAAAACCGAAAAGGTGAAGGGAAAAAAA
ACTATTAGAGCCTGTTTCTTGTATATAGTAGTATGTAATATTTGCTTTGTACGCTTAGTT
CATCCCAATAGTAATTCATAAACAATCACCAGTATATTTATTCCAATTAATGGTACTACA
AGAATAATATACGAAACGTTAGTAAAATTTTCTCACAAAAGGTGAAAAAGAACGGGAAAC
TGATGAAATGTAACTTTAACCGTTCTCCATCAACATAACATACTCCTCAGTAATGTCTGT
ACGGCGCCAATCAATTGAACAACCTTGGACTTCGTGGTATTTTGATCCTGACCAAAAACA
GGTGTCTCATCATTTGATCTTCCAAGGCCAACTGCAAAAATCGGTGAAATAATGTATTAG
CATATTCAATAAAGTTAGTATTAATTGTTGCTTTAAAATAAGTTGTTTATGGTTGCCTCT
CCTGTTTACATACTTCTTCTTAAGAACCTTTCTTCGCTCAGTACTGCAACGGCATTAATC
AATAATAAAATGACGTAAAATAGTCTACCTAGTCCAAACAGTACCATATCCCCTCTATAT
CAAAGTTTTCTCTTCCAAAAGGCTTCTTTTGTGAGTTTTTTCCTATTAATAGGTTTGAGT
ATATAAACCGCCAACTTATTGAGAAGGCTCCCAGTCCAGCTAATTTTTTGGATATACTGT
ACTTAAATGTAATCACGTGACTGTGACAAATGAAAAGACTGTGCAATGATCACGAAAGAC
AAATTTCGAGACATTACGAGCACTATGAGATTAAATGTAGAGAAGATGGATTACGGGGGT
ATTTTTACTTTTCTGATGATGCAATCTGAAGCACTTAGCCAACAATATTCTGTACCATTT
TTCCGAGATTTTCTATTACGAAATGAATCCACGGATCTCTTAAAATTATTGATTATATTT
TTTATTGGAAAAAGATACACATATTTATATATAGAAAACTAAACAATCCGTAAAAATGAT
TTAACGTTTTGAAGTTAGTTTGCTTAATCGGCGTTACGACGAGCAACCTTCTTAGCCAAT
CTCTTACCAGTACCGAAGATCTTCTTGTCTCTGTTCTTCTTTTGCTTTCTTTGTTGTCTG
GAAGCCTTTTCAACCTTTTCAGCCAAACCGTATCTGACTAATCTGTAAGTTGGTTCGAAC
TTCTTAGCTTCGGCAACAGAGTTGTAGACCAAACCGAAACCAACAGACTTACCACCACCA
AATTGGGTTCTGAAACCGAAAACGGAGACAGCGTCCTTTTCAGCCTTGTAGACTTCAGCT
AATTTTTCACGCAATTCATCCTTGGAGACATTAGCTCTGTTTGGGTGCAAGACGTCGACG
ACGAATTGCTTTCTGGCCAACAATGGGTTGGAGATAACCTTTCTAGTACGGATAGTAACA
GCGTCAGACTGAGAAAAAACAATTTAGGTAAAAAACCATTTTAAAAATTGTTAGTAAAAT
AGGTTCCAGTGTGGGGGAAATCTTTGGAAATGGCGTCCTTGAAAGATCCTTCCAGTTTTC
ATGATAGGGATAATAGTCCAAAAAAGGTTCCTGTAGCATAATGGTTAGCTAGATATCATT
TTCTAGCGTTGAACTCTTAAAGCGGGATAAAATATTACGGGTCAGCTATTCGAGTGTTTA
AATTTGAGTTATAAATTTAACCAATTACGATACGGATTTCACATTTCTTTTCACAATGAT
TGCCATTAATATATTAGCCAATAGTTGCTGTTACGCCACCTTAAATTTGCAAAACATTTC
TTCTTTTACTTTCTTTTCTCGTTATGGTACCTTTATTGCCTTTTATACTAACTCATGGCA
ACTTTAACATGGAATATGGGACGTCATCTTTCATCTGAGCACTTTTTAACATACCATTTC
TGCTTAATCTATGTTGGTTTCTTGAAATCTTTGTTTTGAACTAATACCTAACCATCCTCT
AGCTCTTGAAATTCACTATAGTTATTCAATTCTTCTTCGCTGAGACAAAGTTAAAGCGCT
GGGTGGACAACCGAGTGAAACTTCCTTCCAAAGGAAGCAGCCTTCTGGAGTATTCCGTTA
GTGACTGCGGGTCCCCGCCTACAGGACGCTTAGGTGATGAATACTCGCCGAGGCGTAGGC
TGCGGCATCGGACAATCATATTTTATGACAGTGGAAGAAGCGCAAGAAATGAAAATAAAG
TTGTAGGATGTGTGGGCTTGTAAATGTGTGGGTGTACAGTCCCGATATTGGCATACATTA
TCACATCGATAGAGTTTTCTGTTTATATATCTCTCTGGCACTTGTATCTACCTATAAAGA
TGAAATTTTGAAAAACAGAACTAGTGAGCAATTTGATCAATGAAACGAATTTGATTACTA
TATATTTCAATATACAATATCACCAAAAAAAAAAAAAAAAAGTAAAGAAGGTAATTTCTC
ACGTATGCTTAAGAATGTAAATACATTGTTCATTAATGTTTATCACGTTATTATTTTTTT
GTTTTGTTTTTTTTTTTTTTTTTTTTTTTTTTTTGAATATATCCTTGTTAGATTTTATCT
GTATGTCACGAGGCATTnGTTTTTTTTTTTTTTTTTTGAATATATCCTTGTTAGATTTTA
TCTGTATGTCACGAGGCATTTTTCATTATTCTATAATGTTTATCATACATACCTTCAATG
AGCAGTCAACTCGGGCCTGAGTTACTTCAACGAATTGGCTTGTCAATGGCAATTCTGACA
GATTTTGTTTGAGTGTAGTTACTTAAAGCAGCCTCACCCATTTCACGGCCAATACCTGAC
TGGCCGAAGCCACCGAAAGGAACATTTTGGTGGAAGTTGTTATAGGTATTTATCCAAACA
GTACCAGCTTTCACTCTTTTGGACACATCAACAGCCTTGTTAATATCGTTAGTGTGAATA
CCTGCGGCTAACCCATATTGAGAATCATTTGCCATAGCAATCACTTCATCAACAGTAGAA
AACTTGGATACAGTTACAATGGGACCAAACACTTCCTCCTTAACAATTCTCATATCTTCT
TTGACATCAGCAAACACTGTTGGCTTGACAAAATAACCTTTACTGCCATGTCTGGCCCCT
CCAGTCACAAGACGAGCCCCCTCTGATTCTGCTACATCGACATAGTCTAAAATTTTATGC
AGCTGTTTGTCAGATGTTTGAGCACCTTGGAAAACTTCCTCATCAAATGGGTCACCGACC
TTTAGTGACTCGGTGTAATCCTTTAGTTTTTGCAACACCTCCTCGTATACTGTATCTTGA
ATGTATATTCTGGAACCAGCGCAGCAAACTTCACCAGAGTTGTAAAAAATACCGAAGGCA
ATGTTCTTGACGGCTTTATCTAGATCAGCGTCAGCAAACACAATATTTGGTGATTTACCT
CCCAGCTCCAAAGTGACTTTCTTGACAGTATCGGCAGCGACCTTCATAATATGGCGGCCG
GTGGCAGTAGAGCCTGTAAAAGCAATCTTCTTCACGTCTGGGTGTGCACTCAATCTTTCT
CCAACAACTCTACCGGAACCCGGAAGGATATTGACTACACCAGCGGGTATGCCTGCTTCC
TGACACAACTGGGAAGCGAAAAGGGCAGATAAAGGTGTTGTTTCAGCGGGTTTCAATACG
ACGGTGTTACCTGTAGCCAGAGCAGGCCCAATTTTCCATGACCACATCAATAAAGGGAAG
TTCCAAGGGATTATTTGGCCGCAAACGCCTAATGGTTCCTTAATTGAGTAGGTAAAATGG
TTTTTACCTGTGTCAATAACGTTACCGTAGATTTTATCTGCCCAACCACCGCAAGAACGC
AAGTATTTAGATACTAAAGCGACGTCACCGCGCGCACAAAACAATGACTTACCATTATCC
ATTGACTCAATGGCAGCCAGTGTTTCTTGGTGTTTCTCAACCAAGTCAGCGAGATTGAAT
AAAGCTTTAGCGCGAACCTCCGGCTCTACAATAGACCACTTCGTTTCAAAAGCTTTTTTA
GCCGCTGCAACGGCTTCATCAACATCATCTTCCATAGCCTTGTATACAGTTGTTATCTTT
TCTTCGTTAGATGGATTGATCACGTCAAACGTTTTCTTTTGCTTCGAGGCAACAAATTCA
CCATTGATGAATAACCCTGTTGGCTGTTCGTAGGTGAAACCATTTGGAAGAGTAATTGGA
ACGCGTAATGGTGCTTGAGAATAAAGACGTAACAAGCTTCTAGTGAATATTCTGGAATTC
GGAGCTGCAGCTCTTGTGCGAGAAAGCATTTCTTCTTCTTTGGCTTTTTGTTAATGTTGT
GAAGAAGTTTTCTGTCTTAACCACGTTTGATGAGACACTTATCGTATTGTTATATATGCT
AAAAATGTCAAGAAGTCCTAAATTCAAAATAAATTAAGACGTTCTTTTTACATGGGGCTT
ATATAATCGTGTTTTGTTCTGTTCTTTGAAGCCATTCTCATCGAAAAACTCTAACAATCT
GCGTAGTGATGAGTCAGAAGTCTTCCAACATTTTTAACGATACACAACCCCTCTCAGTTT
GTGAAAAAAAAAAGAAAGAGAATAGCTTCCATCTTTTGGCGCCTTAAGCGGTATTCTAAA
GGCTCCGCGAGCGAGCCTCTTTAACCTAATGCAAAAAAAAATTGTTACGCACGTTCCCGG
CTTTTACCGTAATAGTAGTCAAGAGCTTAACTCTACGGCTAACAAGCGCTTGGTTGTACT
ACGCTCAGCGTACCATTAGGCCCTTGCTAGTCCGGTAGCGGCCAAAAAAAAAAATGGAAC
CCTTTTTGTATACTTATTTATCATTGATGTGTAAACGGCTTCTTAGGCTTACATAGCCAC
AAGAGAAAAGAAAGATGCCTCATCGAAATTAAAATTTTTTTATAGCGCTTGATATCTAGT
GAAAGGGGCTGATTTTCAACTTGATATCCAAAACGTAATGAGTACAAACAATAGCTCCTG
AAACGTGAATATTTTTATTGTTCATGATTACCTATAGATGGATACTTTCTATATATGCGT
TTATATGAAACTAAATTATTTGTGAGCATCTTGAAAATACAGTTTGTGCGTAACCCACGC
TTACGATATTGGAATTACAATTTCATAACTTAGTGTTAGCGTCATTGTACTTCAATCTTA
ATATAAAGTTGATAATGACAGCAACCAATAAGAAAAAGCACAACAAAGTGGGCCCCAATC
TGTCATCATAAGGACCTGATCCTCTACGTCTAATCGCAGCAGCTCTCCAGTGGTATGTTA
CAAGCGCGTATATCATTGTACCCATGGCAACAAAAGTAAATAGTCCTGCACTGACCCTAC
CTATCTTGTCACCAAAATTCAGTAAACCTACACCAAGGCCTCCCAGCATAACTGTAAAGT
TCAACCACGACAAAAAGGTACGCTCATTGGCAAAGAACACTTTTGGCTCAACTCGTGTGG
GCAAAGCGATCTTTTTCCCAGGTGTTCTTTGTAATAATGGTGCTGAAGACATATTGTGAA
AATCTGGCGTAGTGTTTAATCGTATTCGATAATGTAGTAAATCGTATGTTACGTGTATGC
AAGTCGCTGGTTATGGAAATATGGACTCTTAAATACTGTTATCTATTTTGTATAATGCAG
CATTCATTTTCTTCTCTCCGAGGCACGTGCTAATATCTATTTCAAAGTGAAGTATCACCG
ACCGTAACAAGCGATATAACCATTAGTTATCTGATACGTGCTCAAAGATACTTGAAGAGA
GAGTCTCATTATTTCTTGTCTCTATACATTTCCCAGTTTGCTATACTTAATCGCTCTTGC
CATTCTATCCGAAAATAGCGATGCCAATATACCTCCTTTTTTGTAAATTTCTTTACTAGA
AAATACGTATTCTTCTCTCTGTTAGCGGATACCGTCTTGCAGTTTTACAAAACGCACTGT
AAATTATTTAGGATAAGTGAAAGTAAGTGATTACGAAAGTCAACAAAAAAATGAGTATGC
AGATTGAAATAAAGGATGGAAGGAGTGATAACTCTCCTCTGCCCGAAAGAAAACTAGTTA
CGTTAATTCAAGAAAGTTATGATAGTTTAAAAGATGACAATGAAATCAATTTATCGACCG
AATCAACTTCCAACCTTCTTATAAAACTGGTCCTAGAAAAACTTGAAAAGCACTCTTCTT
TGTATAAATATATTGCCTCGGTAACGACGTTGAACATTGAAGGACTCAACGAAGAAAACG
CTAATTTCTCATTGAAGAACGATATAGGCGCATCCTGGGAATCTAAAAAAGATGGTATAT
TCAACTATAAACTAGAAGACAAAAATAGTAATGAGTGCTATTTAATTACAATTCTTTGGC
TTCACAAGTAGATATGTATTTGCTTTAATGTTGCCACATAAAGTTGCGTTCCTTTATAGA
ACAATGTTGCCTAGACCCCATTTCGGGGCAGGGGGGAATCTGTATCATGGCCTTCTTACA
AGGACAGCTTAAAATGTTCATGTTAAATTATTCGACTTTTTTTATGTATATATGCAAAGT
AGAAAAATAATTAGTAAACATATATAGGTACCTTTTAGCTTGGCATTAGAATGGAAACCA
ATTTTTTTATCAGAGAAAACAAAAGAAAATATAAATTACACCTCGAAGTAAACACCCAAA
TTTTGATAAAGTATAGAATTGAAGAAATAAAAACTTAGCCCTCATTAACCCGAACACATT
TCACAAGCTTCTGGGTTATCAATAGCACATGCTATAACCTTAGAGTTGTAAATGTCGAAC
TCGGTTTCCTCATCATCAACGATGGGGGCAGCTTTTTCTTCATTCTTAGTTGGGGCAGGT
ACTTCAGGAACTGCTACCTTAGACTCTTGAACGTTTAATTCTGCCATTCCTTTAGTTAAT
GAGTGGCTACCTGTTGGAGCTGGAGATGCCTCTCTTGAAGCTTCCGAGGAGCTATCTAGA
GATGGAATAGTTGCGTTTGCAGTCACAGCTGCGGGCACGAAATCGCTGGCAGCGTAGCTT
GCACTGGAAGGCATATATGATGGACGCTTCAAGTTGGAAATATCAGCAACGTTTTCTGTA
GCTTGATCCGCAATCTTCTGATCAATAGTAAATTGAATTGCAGCAGATGCAGCTTGGGTT
CTCAAATAGTACATACCGGTCTTCAATCCCTTCTTCCATCCGTAAAAATGCATACTTGTT
AGTTTACCCATAGTTGGGGCACGTAAGAACAAATTCAAAGAATGAGATTGATCAATATAG
ACAGAACGATCGGCTGCCATGTTAATGATAGTCTTTTGTGAAATTTCCCAAACAGTCTTG
TATAAGTCCTTCAATTCTTGTGGAACATTTGGTAAGCCTTGAATGGAGCCATTTTGTGTA
ATCAGATACTGTTTCATACCCTCATCCCAAATACCTAAATCAACCAAGTCACGCAGTAAG
TAAGGGTTCACAACCTGGAATTCACCGGATAAGACACGACGGGAGTACATATTGGAAGTG
ACTGGTTCGAAACATTCATTATAACCCAATATTTGGGATGTGGATGCAGTAGGCATTGGT
GCCATGGTCAAGGAATTTCTAATACCATGCTTCATGATATCTTTTCTTAAGGTGTCCCAA
TCCCACATGCCGTAGGGTTTTTGGTCCCACATATCAAACTGTAGTATACCTTGAGAAGCA
GGAGATCCTTGGAAAGTTTCGTATGGACCGTCCTTCTGAGCTAGTTCACAAGAAGCTTCC
ATGGAGGCATGATAAATAGTTTCAAAGATTTGGATATTTAGCAAACGGGCTTCCTCAGAA
TCAAATGGCAAACGTAACAGCATGAAAGTGTCAGCGAGACCTTGAACACCCAAAGCAATT
GGTCTATGTCTCATATTGGATTTTCTCGCTTCTTCAACAGGGTAGTAATTACGATCAATG
ACTCTGTTTAAATTACGAGTAACAACTTTAGCAATTTCATGTAATTTTTTGAAGTTGTAT
GTGGAAGTCTTACCATCCTCAGAAGTTTCAATGAATGCTGGTAAGGCAACGGAAGCCAAG
TTACAAACAGCAGTTTCATCTGGAGCTGAGTATTCAACAATTTCACAGCATAAGTTTGAT
GACTTGATGACACCTAAGTTTTTTTGATTAGATTTTCTGTTACAAGCATCCTTGTAAACA
ACGAAAGGTGTACCAGTTTCAGTTTGAGCTTCCAAAATGGAATACCATAATTTTTGGGCT
TTGATAGTCTTACCACGACCTTCTTTCTCGTAGCGGGTATATAGAGCCTCAAACTCGTCA
CCGTAACAATCGCTTAAACCAGGAGCTGATGTTGGAGAGAATAATGTCCAGGTCCCATTT
TCTTCGACACGCTTCATGAAAAGATCAGGAATCCATAGAGCAGGGAACAAATCTCTTGCA
CGAATTTCCTCTTTACCGTGGTTCTTCCTAATATCAATAAAATCAAATATATCAGCATGC
CATGGTTCCAGGTAAAGGGCAAACGCACCAGGTCTTTTATTACCACCCTGGTCAACATAA
CGGGCAGTGTTATTGAAAACACGAATCATAGGAATTAAACCGTTAGAAGTACCGTTTGTA
CCAGCAATGTAAGAACCAGTTGAACGAATGTTATGGATATGTAGACCAATACCACCAGCA
GTTTTGGAAATCAAAGCACATTCCTTCAAGGTGTCGTAAATCCCCTCGATAGAGTCCTCC
TTCATGGCAACCAAGAAACAAGAGGACATTTGAGGTTTTGGAGTACCGGCATTGAACAAC
GTTGGAGAGGCGTGAGTAAAATATTTTAGAGACATCAAGTTATACGTTTCTAAAGCAGCC
TCGATATCTCTACCGTGGATGCCTAGTGCGACTCTCATAATTAAATGTTGTGGACGTTCG
GCCACTTGACCGTTGATTCTTAGTAAATAAGAACGTTCCAAAGTTTTAAAACCAAAATAA
CTGTACTGAAAATCTCTGTCATAGACAATTGCGGAGTTCAATTTATCCTTGTTTTCCATG
ACAATATTGTAGACATCATCAGAGATCATGGGAGCGGGCTTACCAGTAGCAGCATTGACG
TATCTATAAAGATCTTCGACAACCTTAGAAAATTGTTTTGTGGTTTGTTTATGTAAATTA
GAAATGGCAATTCTGGCCGCTAGGGTGGCGTAATCTGGATGAACAGTAGTCATATAAGCG
CATGTTTCAGCGGCTAAGTTGTCTAGTTCGATTGTTGTGACACCTTCATAGACACCAGAA
ATGATACGTTGGGTGACCTTAACGGCGTCGATATGTTTTGGATCTAAACCATAGCATAAG
CGTGATATACGAGCGGTAATCTTATCGAATTGGACAGGTTCTTTACGACCGTCTCTTTTA
TAAACGTACATGATGTTAATATATCAACAAATAAAGTGTTGTTCGTTGGTGTCTCTCTTG
CGTTGAAAAGGATGAAAAGGATGAGATATGCTTCAATTATGGTAGAGTAATTTTCCAACA
ATGAAATATCAGCTCCTTTATATAATTTTTATTCAATGGTACTGACTTAACAAAGGCAAC
AAGATAAACTCTAAACTTGTTATTCTAAAACGTGAGCCGCAGACTTTGTTGGAGGTTTCT
ATCAAACACGAAACTACCTACGCCAACCTATTCTTTCTACACTATATGAAAAAAATTTCC
ATATCGTTTTTACGCGTCCTCTATTCAACACCCAATAAGATTCTGCAAGGATTTCTGTGT
CCTGAGGATCAAAATGACGCGTTTACTTAGAATTTCAAAAAAAGAAGCAATTAAAGTAAC
AGGGGATGAACTTACCCGACACTGTTTACGCGTTTTTTCTTTTTAAATTTGATTTGGGTG
CCATATAATGGGATAAAACGCGTAAACAAGCTCGTTCCAGGGCTACGAAATATTTCTACC
CAGAAGTGGTCGTAAAATAATTAACGATAGTAAACAAAGGCCATAGAAAGTTCAGCATTG
ACTTGGTAACGAGATTTTCCCCAATGGAATTCCTTTGTATGAAAGATTCTCCTGAAGAGT
AATTCTGCCAATCAGTACATTTCTATGGTAACGCCTTTGTTTACGATATCCAAATGCGGC
AATCCTTCTCTGTTGTGGTGATGTCGTGATACCATAAAGTGGTATTATAACTTTGGATGT
AAGGAGATCAAAGATCTTGAAATCAATAATTATTCTTATGGCTACTCAAAATCAATACAT
GAGAAGCACTATTTTTAGACCATGTCCTACTTCGTTATTTAATGGATATATATATATTTA
TATATTTATATACGTTAATGTCTCATGTGACTGAGCTGCAGATCTACTATACACAGTGAT
CAGACACCAATAATTTTATTTTCAGGGATACCAGCATACTCTCCATAACCCATAGCAAGA
TTAATATTTTGCAGACATTGAGTAGCGGCGCCTTTAAGTAAGTTATCGATGGTTGCGCAA
ACAACTACACGATCTTCAGCATCATTCAGCTTGAAACCACCAATAACTACACCATGGGTG
CCCTCAATATCTTTAACCAGTGGGATATCATCGATGACATGTACTAGCTTTTCGTCTTCG
TAAAAATTTCTGTATAATTTCCTGATCTCATCAATAGACAAGGAACCTTTTTTTATTGGA
ATAGAGACGGTCAAAGAGATACCTTGAAACCACTGCCCAACATGGGGCATGAATGCAACA
TTGTGCCCAATGCGAGCTGAGATTTCGCGTTCGTGTATATGATCACTTAAAGCGTAAGGA
ATTAAGTTATTGTTCAAGAATTTGGGATCGTTTTTTGGAGAAGGCTTCGTCCCCGCGCCT
GAATACCCTGAAACACCAAACACAGTTGGAAGACCATTGATATACTTTGTTAACGGAGAA
ATAGTTAATTGCGAACCAGTAGCATAACAACCGGGATTAGCAATTTTGGCAGCGTTTGCA
ATTTTTGCTCTATCATTCAATTCTGGCAAACCGTAAGCCCAGTCTGATTCTGATACAAAC
CTGTGATCAGCGGACAGATCAATAATTTTAGACTTACCATGAACACTTTGGATTGTCTCA
ACGAAAGGTTCACAGACTTTGTTGGGTAATGCCATAACCCAAAAGTCCACAGCATTTTGT
TCTTCCAGTTTCCTAATATCCTGTATTTGCAAACTTTCATATATAATTTCGGATTTTGTA
TAATCTTGCAGCTTTTGACCTTTCAATTCACGAGAAGAAACATGGGCCACTTCTAAATAT
GGGTGGCCGTTGATCAAAGATACCAAATTTTTACCTGTGTAACCTCTAGCACCAATAAGC
GCGACACGACCAGGGTTGGTGTTAACTCCCTCGGGACGAGGAGTGGATCTAGTTGAGTAC
GACCTAGCTGATTTTTTGTTAGCAAATACTCCACTACTTGCTGATGAGTTGAGGGTAGAA
GCAGTGTCACACGACTTCACAAAATTTTCAACGAGCTCGGATATTGTATTTATATCATCG
ATACCATACCAGAACAAAACTTTTCCGCCTTTTAGATATGAACCTTGAGACTTATCAAAA
TGCCATGCAATGTTAGCATCATTTTCACTGACTACCCATTGTAAAGCAGGAAAATCACGG
CGCAAAACATTGAATACATTATCTGTGACGTTATTCAACCAGGCTGCGTCAGAACAGACA
AATTTGTCTAGTGTGGGAACGTTCGTATCTTTCTTTACAATGGCCACTGCTTCAAGAGGT
TCATCAGCATAAGAGACAAAATCAGAGTTTTCCAAATATCTTAAATAAGAAGCAACAGAT
TCTTTACCGGAACTAATGCCAGCGTCCCTTTGAAGAGCTTTTCTTAGAGCATCAGCGGAT
GGAAATTCGCCAATGGAGGATCTCTTCACTAATTTGTAACCTCTCCTGATCATAGTACCC
GCACCAGAATCAGTGAACAGTTCTTTTTGTAGATCTTGAACGTTAATGATTGCAACTGAA
GAAGAACGAGGAAGATAGTCCAAAAGCTCTTTAATTTCTCTAATTTTTAATTTGGTACCA
TACTTCACCCAACTTTGCTTCATTAAATCGTCATACTCTTCATCCAAATTGATCATCGAA
ATTTTTTCTCCCGTGGAGCCATTGATAATACCCCCTTTCTCATTCAGGTAAACGATCTTC
AAAGGCTCAAAAACACGGGCTAATTCACCAGCAGCTACGTCGGCGTTGACGTTCAACATT
TGACCAGAAGCAGTTTCGGCTAAAGAGGTCAAGATTGGTAGGGCACCTGCCTTAATAGAT
GCTTCAATTGGCTCTTTCGTGACACTTTTAATATTGCCCACTAGCTTGTATTTGTCCTTA
TCCAAATAGTCAGCAGTAAAAACACCAGAAGTAATGGGTCTTGCACGGACCCCTAGCTGT
TCTAATGCAGTAACTAGCTTAAGATTTTGTTCCAAAAAACATTTTCTAACTACGGCCATT
GTGTGCTCATCCGTGATTCTAATACCATCAATATAGTCTGGCTCAATTCCCTGCGCTTCT
AGCCTTCCATTAACCTGAGGACCGGTACCATGTAAAACTATTGGATATAGACCAACATGA
TACAAAAATGCCAAGCAGGAAGCGAGTTCGTGTAGATTGTCGCTGATAATGGCACCACCC
ACCTTGATCACAGCAAATTGTTGTTGTGAGACGGAAGTGAAATATTTCAAATATTGTTCA
ACCTCTCTTTTTGTGCTGATATTGTTCAACAGTTGGATCACAGTGGATCTAGTAGCTGAA
AAGCCGTTAGTAGATGAAACATACCTCTTTGAGTATCCGACTTTCTTTCTCGTAAATGCA
ACGGATGGTGGAGCTCTCAAGGGTACAGATGCAAATCCTGCTATGGTGGATTTGTTTAAT
GAAGGCGCAAATTTTTGGAATTTGGAAGCGTTAAGTCTCTTTGTCGAGACGAGTAAGCTA
GCAGATGGCATAATGATGCAGACTTATTTCTCACTTCAGATCTCTCTTTCTTTTGCCTTT
AGTGGTATATGTGTTAAGTATATTACGGGTCTGAAAAATAATATCCAAAAATGTTCCTAA
TGGAAATGGATAGCGAATAACAACACGCGCGCTAGCTCTTTATATGAAAAAAAAAAATAA
AAGAGTCATCAATTACCACCATTCGGCCACAGTTTTTTGATGTAGACTGAGTCATTCGGA
TAAGAATTCCAACCAACTGCGCAAGAGATTTCGTTGAAAAAATGTGATTTAAGTGAAAAA
ATTAGCGAAGCAGGTTCCGTGCATTATGATATATATCATGATGATTATTTTCTATGAATT
AGTCATTCTTGCAGCGCTGACGCTTTCATACGTTGTAACGAGTAAATAGACTATACTGGT
ATATGCTATGGCATTATTCATTAGCCAGATACCTTTCCCAGATACCTTTCCACGTCAAAG
GTTTAAAAAAATGGGTGAGATTTTTTTTTCTTGCATTTCGTTATAAACGGAGAGATTATA
TATTCATGAGAAATAAAAATAGATAAAATTATGGTTAATGCAAACAAGAAAAATATTTAG
AGTCGGATTAATTACCGGCGATAATTTTCCTTCCGTTGATTAGTTGATTTAGTAAATCAG
AGGAATTTCTTGAGCTTGTATCACCCATTTGTTGCTGCTGAATAGGCACCTTATGTTGTG
GACCAAAGATACCCGGTGGAGGGGTACTGACGTTTAATGGTGGTTGGATTTGCTGTGAGA
CGGTTTGCAGTCTTGTTGGTTGGGTGGGAGTTTTCGTATTATCTGTGATTGTAATATTGT
CATTTACACCAACATTGACACTCTGCAAGAATTGAACGACAGAAGCAGTGTAGTCTATTG
GCTTTATAGCCAGGATCTCCACAAGTTTGTTGGCTAATGTATTGTCACTTTTCTTTGAGG
CCTCAATCTTGTCCCAAGAAAACAAAGACGGATACTTTTTATAAGTTTCTTCGTCAATAA
TATTGGATTTGATAGATATAGGGCGCTTCTGATAATTTGATAGAGAATGTAGTCTTGCAT
CCAAAAAGTCAACAGCATTCCCTAGTGCGTCATAAGGATCTTTGTATTCCTCTGCAGCAA
GAGATTGCTTCTTCTTGCTACCATGGGAGTGACTTGTAGCATTGGTATTGGTAGTAGTTG
TCGTACTTGTGATGGTATTCTCTGTTGTGGGGGTAGTATGATGGCCCAGAGAATCATTTA
ATGTTGGCAAGTTTATGGAGCTGCTGTTTTTAGAGAGATTGATAGAGGCTACAGGTGTTG
CTGATTGAGTAACTCCCCAAGGATTTGACCCTGCAGGGACCGGAGCAGGTGTTAATACCG
GTGTTCCAGCGTTTGTATGGCTGTCATGATGTAACTGAGCCCTCATCGCCGCCGGTGAAG
GTGTGCCTGTGAAATGTTCACTTAGTAAATTGGTATTTGAACCAGCGGTACTGGTAGATA
TATTGTTGTGTATTCCAGATCTAGTGAATGCAGTTCCGCCACTTTGCTGTTGCGCTTGTT
GTTTATTGTGGAGTTCTCTTTTATTAAAAGAATCAGCTTCTTCACCAGGTTCATGCAAAA
ACATACAGTTGGGATTTGGGCATGGCAATCCTCTTAAATAAGAAGAACAGTATTTAGTAG
TACCGTAGGCAGCTTTGATCAGGCGGCCATCCATATACGTCCCGTCTACCTGAGCTATAC
ATCTTGCAGCATCGTCCTTGGATCCGAAGGTTATGTAAACGCCATATCCTGGTGAATGAT
GGTGATAATGCTCGCTGGTTGTGTTGTTAGAATGGGGTGTTTTTCTATTAACCACAATCT
TATTTATCTTACCATATTGGCCAAAATATTTTTCAGATTTCAGAGTGGGCGCAACTTCCT
CGTATGGAACAGGAGGATTGATGCCAACAACGTACACTAAATTCTTTTGGATAACTCTGG
TACCAGATAAATGTTTCCTATTCGTATATTCATTCTCTTTACGTTCTTTTTCTCTATGCT
TTCTTTCTTTCTCCTTCCTAGCGAGCTTGGCTCTCTCCATTTTTAACTCCTCCGGAGATA
ATGTGACGTATCTGACGTTCTCGTCATCATATTTACGACGACATGCTGGGCAACGGCCAT
TTAATTCTGGATTTTGTCTGATATTATTGTAGCAAAATTGACAAATTTGATAACCACAGG
GACAAGGAAAAAAATTTTTATCAGTAATATCCATTGGTTCAATACAAAGAGGGCAATAAT
CTTCTTCATCCTCCGATAAAAATGACGTATCAAAATTGCTTAAGGCGTTGTGGATTGCTT
GCAAATTTTCTTGAACGTGTGGATTCATCATTATGACTGGATTATATACGATACTTTTAT
TTGGTCTTTTGTACTTTTTATTAAGTTTTGGGATTGTTGCAGAGTAACAAAAGCAGTAAT
CTATACTATTCGAACCACTACTGAAAACCCTAGGAGGGCTTTTACTGTATGTAGTACACG
TCTTGATATGCTTTTCGGAAATTTTGAAAAGAGAAAGCAAAAAAAAAAATCATATTCACA
CTTACAATGTTACCCGGGAAGAGACGGCAATCAAGTGGAAGTTCGGGTAATAGCATTCAT
TTTAGAAGCGTCGATATAATCATCGACCAGGTAGTAGTTTAACAATACATTATCAGGTTT
CGCGGCGTAACAGTGATACTACTTTATAGCGTTTCACGTCTTCGGGCTCAACATTTCAAT
AAAAAAAATTCAAAAAGTTGCTAATCGTAAATCATTAAAGGTACATAAAACTACTTATGA
ATTTGGGAGGTTAGGATTCAGTACTAACACATTCTCTATGACACAACCTTTAATTTGCGC
CTACAGGATGTGTTTTGTAATCGACAAATACCATAGCATCTTCATGTGTGCAAACTACTT
GAACGTCTATCTTGAAAGGTCTACCATGGTATTCAGTTTCCTCACCGTAATGCCAGGTGA
TTTTATCAAATGTCTCTTCCTTCGATTTTTCGTGAAATTTAAGCTCAGGTTTCCTAACGG
CTTGCTTAATATCTTTCAAAAGATGCTTTTCAATATGCTGGTGCAGGTGACGCACGAACT
TCTTAGAATGAGAATTTGCAGCATCACTAATTTTTTCAGGGTCCTCGTGCGACTCGTGTA
GCACAAATGGTGGGTAGTAATTTAATTTACAGTGCAAATGATCGAAATCATCATCTTCAG
TTTCATTGGCAATGAAAGTTTCAAAACCCTGCAGGTCTTCAAAAACTTTCACGGTTTCAC
CATCCTCCGTGGTAACCGTTTGAACTTTTACTTCCTTCTTATCCTTCTTTGTCATTTAAA
GTGGAGACGAAAACAGTCGATACCTAATTTATATGTTCTATGGGCAATTATTAGAATACA
ATGCAGAACTTGTCCCTTTATGAAATGTTTTGACCAAAGAAATTTGAACGTGGAAGAACA
AAAGATTCAAATATACGCTAGAAATCTTTTGCCTTATATATGTGCACACAATCAAGTAAA
GACACTTGTATTTTTCCACCCAGCAATACCCCTTAAGAACGCTGCCCCTTTCATTCTATA
TTTAATTAACCATACAGTAACTTATAATACCCCTGATTACAGGATGCATTTGTTATGGAA
GTCAATTGCCGAGAGCCGTCCACATTATGCTGGTTGCCTCGAGGATATTATTTTTTAGCA
CATCCGCAATCTCGCCACACCGCATTTCCGTTCCTTCGGCCCCTGAATCTGGGGTAAAAA
AAAAAAAAGCAGTCATCTGGAGATTGTATCACCCAAAAAGAAATACGTTTCTGGCTCGTA
ACAGGTATGACAACACGTTGTCAGAATACCAAAGTTTAGTCTGAACATTTGACTGCGTGT
ATATCGGAAACGCTGGATTTTTGGTGCCACCTTCTTCGTTCATGGCATATGTGTAAGTCA
CGTAGGATTAATGTCATCAATTTCATGAGTTGAGTGAAAGTGCAACTTTACAATGTAGTC
AACATACTGCACCGTCATCATTACATATTTCAGATTAAGGGTGATAATGCCGCTTTCATA
ATTCCTATTGAAACCATGTATTGGCATATGATACTTCAGGAAGATGTGTTCGGCAATCGT
TGCTTTTACTTCTGTACTCTTGACAGATTATGTCATTTATTCGCATCAGTAAGGATGTAG
CTCTTGTCTTCTGTAGCCGAATTATCGAAGTTAATGAATAATATTACACACAGCTACAGT
TTCAGGAAAAATATGAGACGAGTCGCAAATAAGCGGCCATTGTATACATTATGACAAAGT
GAGTGTGATAATTACTGCATGGCCCAATGCATGAAAATATGGGTCAACTTGTACCACATT
TGCTACAAATGGACGATAACTGAACTGGGCATAAACAAAATTACTTTTTCCTCGATTTTA
GTCCTGCTGATTGAGCTAATAATACATAGCTCGCATGTAATTAATGTTGATATATTAAAC
TAATAAATAGCACATAACTTATTAATGTAAATTCTAAAGTTTTATATTTGTTTACACCGA
AAAAGTACAACTGAGTTCCAAACGTGACAAGGTAAGTTCTGCATCATTCTCACATCAATC
TTCAACTAAAGTCCAAAATTTCTAAAAGATTTCGCTTGTCTCGTTCTACCGCTGCCACAA
GTGTGTTGTCCTTAAAACTAACGTTCCAAACATTATCAGCACCACTCAATGTATCTGAAC
GGACTAACAGCCCACTATTTAAATCATAAATATTGAGCAAACCTTCAGATCCACTCACTA
ATACCTCATCAGAAACGTGCAATGCGGTGATTGTATTCAACTGCGTGTGATCGAAAAAGT
GCTTCAGAAAGTAAGTGTTAGCGTCCCAACACCTTATTGAACCGTCTGCAGAAGCACTGA
CTAAAAATTTATCGGATAATCCCAATAAACCGACTAGGGCTCTGTGACCCCGCAAAGTGT
ACATAGCACCAAGTATTTTGGCGCATGGCGATGCTGAATTTGTTGCGTAGGAACATTCTC
CATTATTCCTTATATTTTCCAAATCCCAGATTCTAATAGTGGTATCCATACTGGCAGAGA
TGCACCTTTTTCTTTCATGATCGTAGATTGTCGAATAAATACGATCCGTATGTCCACTCA
AGATATATAGACATTTCATTTGCGCAACATCCCACACAATCAATGTATTATCATAGGAGC
CACTAATGGCAATATTACCGTGGCCTGAGACAGTTCTTACAGTCGCCGTATGTCCTCTTA
AAACACCAACAAAATATGGGTTCTCCTCAGGGGTATGAAAGACTAATGGATAATCATGTT
CTTCCCCATGATCAGGAACGGAGGACTCCTTGGGCAATTTCCAAACGTGCAAAGTGTTAT
CTCTCGAACCAGTAACAATGTACTTGATATTTTTATATTCTACTATATCTAGGCACCTCA
CCGTAGAGTTATGACCTTTAAACACATGGGTACAACAACCTTTCTTAATATCCCAAACTC
GCACCGTTCTGTCTGTAGAACCGCTGACTAAAATACCGCCATGGGCATACTTCAATGCCC
AAACCTCACCATCATGACCTGATAGTTGTAAAAGAAATCTTTTATTTACTAAGTTATAAA
CTCTGATCATTTTATCACATCCTCCTGTAATGACATAATTATCTTCAACTTGCAAGCACG
CAATAACACTCGTCATATGGCCACTTAACGTGGTCCTTTGAGGTGTATAATCAGGATCAA
ACAAATTTACCAAAACAGACATTTCAGACACAACTTCCAGTACTTTATTAAAGCTTCGCA
GATAGACGTTCTGATATAATTCCAAGGTAATAGAAAGCGATTGCTGTTTAAGTTGAACAT
GGTTTGCATTGATTTATTTAAACTTCGGGTAAATTGCTGGCTGCAACTTTCATTTAGACG
AAAATGCAAAATCAATTGCCCCTTGTTGATAGCTTTAAGTGGAAGCCGTTGACTAGGTTT
TAACGGGAGTGTGACTCCAAATGAAAAAATTATTGAAAGCTAAGATTATTTTGCACTATG
ACATTCTCGATAATCCCTTGGAAAGATTTAAGTGATTAGTCCGAGTACCGATATGGTTGA
GAATCAAAGGTTTCTTTTCACAACGGTGACCCCACCATTTGAAAAAAAAAAAAAAAATGA
AAACGATGGCAACGCCCTTATCTGGCGTGGTTATTACCATAGAAAAGTTTATTCAATGTT
TTTGTTATTCTCACTGACACAGACAGCATTTTGGAATATTGCATTCCTAACATATTGCTA
CATTAGCAATTGAAAGGGCAGTCGGAACTATCACGTAGTTTGAAAATGTCTTCCCGCTTA
GCTCATTATGCATAAGCTTGTGCACGGTGTCATGGTCCATTTACTGTACATGGTAAGAAA
GTTTTATTCCACCTACACTGATGTTGGCTGGTATGTTGATGGTTTTTGATAATTCACGTG
TAATTAAGAACATCGAAACACTATCTGATGTATTTTTTATTGTTGAAATTTCTGACTCGT
TTACAACCTACAAGCCCATACTGAGCTAAGTTTGCCATGTGCCCATCTATCTGTATTCGT
GTCGAATCGGAAAATTATTATGGTACTTTTGTGTTGGAGATGGACAATAGAACGGTATGA
TGAGGCTTTGGTATTTCCATTTTAACAAGTGAATTTGAGAATTGGGTGATTTGTGATTAT
ATTTGGGTGCACTGTTGGAAAAGGCTATAATATTACGCATACAGGATATACTGGTAGCAT
GAATACTACCCCAAATGGATGATATTTTAGGGTTTCATTGTAGCAGATATCGGTGGATGT
GTTCTTATTTTTATATGTCTCTGATAGTGGTTCTTTTTTGGGAAATTCATAATGATAGGC
ACTATGGCCGAGTGGTTAAGGCGACAGACTTGAAATCTGTTGGGCTCTGCCCGCGCTGGT
TCAAATCCTGCTGGTGTCGTTTTTTTTATTGTTAGAGGTGCCTTGAAAATGCTACATTCA
TGAAAAGTAGTTGAACTGCTTGGAGACCATATTTACTGGAATATCTTCATATGGTCGAAG
GCCGTTTGATGCTTCCAAACTGAATGTTGGGCTGGAATAAATTTTGTAATAGTAGTGCTT
CAAATGAATTATTTTTTTTTCATTTTCAATACGCAAATGTAAATGACGCATACGCTGGGA
CTGATAAGGTTTGTATTTAGATTCTTCCTGGCCTAAACATTATGTTAACTAGGTTTGTTT
TTAGCGCAATTTCATTAGTTCTCAAGGAGCACTACAGATTCTTATTCACTATGGTTTAAG
TTATTTCTAGAAAATATAGTGTGATCATCGTCATATATTTTTCGGAATAAAAATTCACAC
TCACTTATCGACTATTAATCATATTACTAGTATATTACCATATACTCTGTAAGAGGATGA
CATAAAGAAAGATAACAAAATTAAGAGACAGCCATCAAAATTTAATGGAAGCTGAAATGC
ATGATTTTGGAAATGTAAAGGATAATGAGTGAGCATATAAAATGGAAGAAAAAATAATAA
TAGGATTATGTATAAAATATCGATTCCCTTTTGTAGATTTCGAGATCTTCGAGGAGAACT
TCTAGCACGTTGTTTACATATCTAATGTTGTAACACGGCCTTTGTTATCTTGTGAATATA
TCCATCACCTACGTCGCTTGAGGTTTCGTATCAAAGAAAGAGAGTTCAAACATAATCATA
CGTGTTTCACTCCAAATTTGATCACAAATGGCCACCCATTATAGCTTGTTATTATTTATT
TCTTCTTGAGTTCATTTTATTGAAAGATGCCCGCTGGGAACAAAACATAAATAAAATTCA
AGAGTACAATATAGCGTAGCATAGTTGCGAGCAAGGGAAGGCAACACAGTTAAAATGACA
ATGTTAGAAGGAAAAACTAAATCAAGCTCCCATAGGAAATTTCTTGTGTCAGTAATATGT
CTCGAGAAAATAATAATAATTGAATCTATTTATTGAAAAGTAAATATCTCGTAACCCGGA
TGCTTTGGGCGGTCGGGTTTTGCTACTCGTCATCCGATGAGAAAAACTGTTCCCTTTTGC
CCCAGGTTTCCATTCATCCGAGCGATCACTTATCTGACTTCGTCACTTTTTCATTTCATC
CGAAACAATCAAAACTGAAGCCAATCACCACAAAATTAACACTCAACGTCATCTTTCACT
ACCCTTTACAGAAGAAAATATCCATAGTCCGGACTAGCATCCCAGTATGTGACTCAATAT
TGGTGCAAAAGAGAAAAGCATAAGTCAGTCCAAAGTCCGCCCTTAACCAGGCACATCGGA
ATTCACAAAACGTTTCTTTATTATATAAAGGAGCTGCTTCACTGGCAAAATTCTTATTAT
TTGTCTTGGCTTGCTAATTTCATCTTATCCTTTTTTTCTTTTCACACCCAAATACCTAAC
AATTGAGAGAAAACTCTTAGCATAACATAACAAAAAGTCAACGAAAAATGCCTATCCCCG
TTGGAAATACGAAGAACGATTTTGCAGCTTTACAAGCAGAACTAGATGCAGATGCTGCCG
AAATTGAGAAATGGTGGTCTGACTCACGTTGGAGTAAGACTAAGAGAAATTATTCAGCCA
GAGATATTGCTGTTAGACGTGGGACATTCCCACCAATCGAATACCCATCTTCGGTCATGG
CCAGAAAATTATTCAAGGTATTAGAGAAGCATCACAATGAGGGTACAGTCTCTAAAACTT
TCGGTGCCCTAGATCCTGTCCAGATTTCTCAAATGGCAAAATACTTAGACACAATCTATA
TTTCTGGTTGGCAGTGTTCATCAACTGCTTCCACCTCAAATGAACCTGGTCCAGACTTAG
CTGATTATCCAATGGACACCGTTCCAAACAAAGTGGAACATTTGTTCAAGGCCCAATTGT
TTCACGACAGAAAACAACTAGAGGCACGGTCAAAGGCTAAATCTCAGGAAGAACTCGATG
AGATGGGTGCCCCAATTGACTACCTAACACCGATTGTCGCTGATGCAGACGCAGGCCACG
GCGGTTTAACCGCAGTCTTCAAATTGACCAAGATGTTCATTGAGCGTGGTGCTGCTGGGA
TCCACATGGAAGACCAGACATCTACAAATAAGAAATGTGGGCATATGGCAGGAAGATGTG
TTATACCCGTTCAGGAACATGTTAACAGATTGGTGACTATTAGAATGTGTGCTGATATCA
TGCATTCTGACTTAATTGTCGTTGCTAGGACTGATTCAGAAGCAGCCACTTTGATTAGCT
CAACCATCGATACCAGAGATCATTATTTCATTGTCGGTGCCACCAATCCAAATATCGAGC
CATTTGCCGAAGTTTTAAATGATGCCATCATGAGTGGTGCATCAGGACAAGAACTAGCTG
ACATTGAACAAAAATGGTGTAGAGACGCTGGACTCAAGTTATTCCATGAAGCCGTCATTG
ATGAAATTGAAAGATCAGCCCTGTCAAATAAGCAAGAATTGATTAAGAAATTCACCTCTA
AAGTGGGTCCATTGACTGAAACATCCCACAGAGAAGCCAAGAAGCTCGCTAAAGAAATTC
TTGGCCACGAAATTTTCTTCGACTGGGAGCTACCACGCGTAAGGGAAGGGTTGTACCGTT
ACAGAGGTGGGACGCAATGTTCTATCATGAGGGCCCGTGCATTTGCTCCATATGCTGATT
TGGTATGGATGGAATCTAACTACCCAGACTTCCAACAGGCCAAGGAGTTTGCAGAAGGTG
TTAAAGAGAAATTCCCTGACCAATGGCTAGCTTACAACTTGTCTCCATCCTTTAACTGGC
CAAAAGCCATGTCCGTTGATGAACAACACACCTTCATCCAAAGGCTGGGTGATCTAGGTT
ACATCTGGCAATTTATCACATTGGCCGGTTTACACACTAACGCTTTAGCTGTCCATAACT
TCTCTCGTGACTTTGCCAAGGATGGGATGAAAGCTTATGCCCAGAATGTTCAGCAGAGGG
AAATGGACGATGGTGTTGATGTGTTGAAACATCAAAAATGGTCTGGTGCGGAGTACATCG
ATGGGTTATTGAAGTTAGCTCAAGGTGGTGTTAGCGCAACAGCTGCTATGGGAACCGGTG
TCACAGAAGATCAATTCAAAGAAAATGGCGTAAAGAAATAGGACAAGGATTAACCATTAG
AACTGCCGGCATTTCCTGACAAGTATATATATTCGTAATCTCAATGTATATTTTTTTCAT
ATATAAACATGCGTACTTAAAAACTTAAACTCATCGTTACTGCAGTACAATGTTCTCTAA
TGGCATCTCTCTAATGGTACTCCAACTAAAGTCAACATTCTCTCCGTACAAGAATGCCTT
TCTCTAGTTGCAAAAACGAGTCAATAAACATCTTTGATCGAGTCGCCTCATTTTTGTTGA
CTCGGTGACTAAAATCAGTGCCATTTCTGTCCATGCCTCGTGCGCGAATGATTGAATCGA
ACTAATCCCGAACACAATCATAGTATCGTATCGCCCATTAGTGCCGTGAGTGTACGCGAG
GCAAAAGGCACCATGGAAAATATTCCCTTAGTCATCTTGGAAATCATTGAGACTGTAAAG
GAACTCGCAAACGGGTAACCGATATTTACCCCACCTTTGGTCGAGAAATTCCACCTGTTC
GGCAATTTTTGCCGCTCTTCTCAAGAGCAAAAGGCGTTTTTTTTTCTGACACGCCTCTTC
TCTCGCATGCCAAACTCAAGCGTCCTACATGCTTTTCTCATGAAAGCCAAGTGCGGGATG
AAAAACATAAAATGTGACAAATAGTGCCACCTCATAATGTAATCGAGAGGCAAAATTAAT
CACTTTGTTCTCCCTTTTCTTTTTTCTGGGCGCTCAAAGTGAGATGCTTTCTGTAGAAAA
TAACATGGCCGTTAGAAGGTACTCGTCATCTTTTAGCTGCCGCATACATGTACACACACA
CACACACACACGCACGCACATATATATATATATATATTAAACATGATGGCAAAAAACCGA
ACTAAGTGCTCCTGTTCTATTTTTATATTCTTGCTTTTCATATTTCTCTAGCTGTATATT
ACCTTTAGCATATTCAAACATCTTAACCGGAAAATATCTCAGCAAAAAAAACAGCAACAG
TCAGAGTAAAAATTGCAAGATGATTGACGATACTGAGAACTCCAAAATTCATTTGGAAGG
TAGCCATAAAACAGGAAAGTATACGGGCTATGGTACTACACATAAAATCAGAGCTCAGTT
AAACTTTAATGATGAAAAGAAATGGAAGAAGTTTTCTAGCAGAAGACTAGAACTCATTGA
CTCATTTGGCTTGAGCCAGCACAAAGCAAGTGAACAAGATGATAATATAAGACAAATAGC
CACCATATTAAGGAGTGAATTTGAGTACCCTGATACGTTTTCGGCAGAATTTGAAAAGTT
GGTTACCGCTGCTGTTCAATCGGTGAGAAGAAACAGGAAACGTTCCAAGAAAAAATTATT
AGACTCCAAGAAGAAAATAGCCCGTGGTAAAGTTCAAAAAATTCCTTTGTCTCCCCCCAG
CTCAAGTTATATGGGGTCTTGTTCAGCTTCCAATGCATCAAGCTCTGACGAAGAAGCCAG
CGTGAAGGAAGAACCTGCTGAGCACGCTCTTCCTTCTCTTAATACTATAACATCACAAAA
ATTGTTACCTTATCCGAATGGCCGCACTCTTCCACCTGTACCAACTCAAGTTCGCTCTTT
ACTTAAGAAGAACGCATCTCTTCTTCGTGATCCATCGGCACCGTATGCGCACGGCGGCGA
TGAAAAATTACAAAAGTTTGATATAGAAGATCAGCCTCTAGAAAGTGACCAAGAATACGA
CTTTATTGCCAAATCAATAATTGTTGAAATTGTAAATAATGCTATTCCACTACCTGAACA
AATTCAAAGAGATAAGTTCATTAGACCAAATTTAACGGAAAAAAAAGGGTGCCAAAGCAA
AGTTGTAATATCCAACAACTTGAGAAAACTCATCCTGTCAAAGATACATAACTCAAGGAC
GTGCTTGGAGATGTCTAAGGATGAAAGAAATTTGGATTCTTTTGCTAATCTAGAAACGCT
GGGCAAAAATTCACTAATGGCTTCCATTTCCCTTGTGGTAGAAAACAGCTTTTCACATTT
ACCGTCTTCTACTAAGCAATATCTTACTGAACGGCTGTCATCAATCGAATTTTTGACTAT
TCTATCGCAAAGGCTATTTATGCCCGCTACACGTCAACTATTCGCTGACCTATCACAAGA
AAAAATTCAGGTGAGAGTGCTGAATCTAATACTGGGATCTCTTGTCAAAGATTATGGGTT
TGATGCATCTTTGGCACCAATCAACGAAATTATCTATCACATGACACTCCATCAATATCC
CTTGGTTTGTAGTAATAAACAGTCCAATCCAATGAGGCCACACTCCACATCTGAGGTCTT
GAGTGCACATTCTTCAACGAAAGATGCAAGCACTCCCGGTAAAGAAGAGCCTCGAGTGAC
GAGGTCAAGCACATCGGCAGATAGCACTATCATTACATTGCCTTCAATTGAAGTCCCAAA
TACGTACGATGATGACAGGTTAAAGATGTTGAGCGCGATATCGTTGCAGATTGAAAATTC
CACCTTTTCCAAACCATTCAGTACTATTTCAAAATAAATAGGCCCGCTTGCATCATCCCC
ACCTGCATTACTATGAACTATTTATCATAGCTTATTTTTCCTCTATCATCATTGTAACTT
GTACAAGAATGTTCAGTCTGTAAATCTCGCCGCTCATTCTCTACTAGCACTTTACAACGT
TGACAGCCACTGTATGTGTAATACAGTGAACCGCCGACTCTTCGGATTTAATAACACAGA
TTTATTTAGAATAATCTACACATGTTTACGTATGCAACAAATTTTGCACCTTCATATACA
AACAACTGCGGTCGTTTAAAAAGTGGGAAAGAACCGAAACTAGAATGAAAAACTCCACCA
AAACGGCTTGAGCCTTTATCTTCTGTAACCAGAGCGGTTGCCTCTCCTGTTTTTACTTAC
TCTGGAGCGGTTGTTTGCATTTTTGTTTCTATTTTTAAATTTACCGTTATTGCCACTTTC
AGGTTCATTTTTCCTACTGACAAGGCCCAGTTCTTCAGCCAACTTGCTATTCAAGTCAAC
ACCAAACTTCTCCACACGATTTATCTGTCTTTGTAAAGAGTCAATATCCGCTTGATCTTG
ACCGAATTTGTTAGCGCGGTGCAGTTTCTTATTTAAAAGATCCAATGCTTTGGCCTTAAT
TTCTTCTGGTGACAAAGCGGGAGCAGCAGTGGAAGCAGCAGCTTGTTCGTTCTCTGAAGC
AGTAGCAGAAGGTCCATCAGAGGGCTTTTGAACGTCCTTATTTTCCTCCTTGGGTTCGTT
TGTTTCTTTAGGCTCGCTTGAAACTTCCTTTTTTTCAGTAATGTTCTGGGAGGCTGGTTC
TTCTATCGCCGCAGGTTCTGACCCTTGTTCCTGGTTTTGTTCCTGTGGAGAAACTTCACT
TTCACCCTTTGATTCTTCATCGTCCTTTATCAGTCTTTGAACTAGTTCATTCTTCAATCC
GCCTACAGACAGATTTCTCTTGGTCAGTAAATCTTTCAATTGAACAACAGTAAGGGAAGA
ATAATCTGCCATTGTAAGTGCTTGTGCTGGCTCCAAGAACAATTCTAGTGGTGAAAAAAA
TTCTATTCAATATACAGATATCTTTGTAACTTCTGAAAGTAGCGCATCCTGAAAGGACAC
ATTTGAAGAGTCACCATTCAACTTTCTTCTCCCATTCAGCATTATCACGCCCTTCCACCA
ACGCTGGTTGCATTGTGTTTTCTTACTTCGGCTAGAGACGCCGGGTAATAAAATATATAT
CCTCGAATGAACCGCTGGCCTCGGCCATTTTCATATGACTTCATATCATTAACATGGCCG
TAGGTTAAGCAATGCTACGTGAAAGATACCAATTCCAATCGTCTGCTTTCTCTCAAGAGG
AGACTTTGCGTTCTTTAAAGGAGCAGAGAAAGAGGGAAACGGTGAAAAACTTCAATATTG
ATAATATCCATCAGCGTCTAAATTCCTATGCCTCCTTCGAAAATGGTCAATGTTATACCC
TCTCCCATTAGATATTACCGTAGCGTACGTATTTGGCCCTGTCCTTTGGGGTTTGGCCTT
CTCAAGTATTTTGGCACCTCGCCCTGAACGAAAAGCTGGCACTTTGTCCCCAGCCAAACT
CTTCTCTCTAATATCGTCTTTAACGACAAGGTAAAAAGATTTTTGCAGTGTTCCGTCTGC
GTCATCATCTGTGCCCCACAATCCGCGGCGTTTCCGTGTAAGCCGTCAAGTGAGGACTTT
TCGGATGCTGAAAGAAAGTACGCTCGGAAAAACTACATAGCTACCCCCCTAAACGGGCCT
CCCACGTGACGTAAAGTAGGAATAATAAGAAGCCAAGTCGTTTCTTTTTATTCTAAATAA
GTTCGTTTCTTTTGATGTTGTCATTTTCAGAAATATATATATATATGCGCTTAAATATAC
AAGCTAAAACAACATAGTCAGGATTGCCAAAGGTTTCTTTTCTACTCAATTTGGTCTAAC
TCTTTTCATATTAATAGCGCCAACCAGCTAGTGTTTACCAGATCAGTGGAAAAACATAAA
ACAATAAAAACAATATTCGGAATGGGATTGACTACTAAACCTCTATCTTTGAAAGTTAAC
GCCGCTTTGTTCGACGTCGACGGTACCATTATCATCTCTCAACCAGCCATTGCTGCATTC
TGGAGGGATTTCGGTAAGGACAAACCTTATTTCGATGCTGAACACGTTATCCAAGTCTCG
CATGGTTGGAGAACGTTTGATGCCATTGCTAAGTTCGCTCCAGACTTTGCCAATGAAGAG
TATGTTAACAAATTAGAAGCTGAAATTCCGGTCAAGTACGGTGAAAAATCCATTGAAGTC
CCAGGTGCAGTTAAGCTGTGCAACGCTTTGAACGCTCTACCAAAAGAGAAATGGGCTGTG
GCAACTTCCGGTACCCGTGATATGGCACAAAAATGGTTCGAGCATCTGGGAATCAGGAGA
CCAAAGTACTTCATTACCGCTAATGATGTCAAACAGGGTAAGCCTCATCCAGAACCATAT
CTGAAGGGCAGGAATGGCTTAGGATATCCGATCAATGAGCAAGACCCTTCCAAATCTAAG
GTAGTAGTATTTGAAGACGCTCCAGCAGGTATTGCCGCCGGAAAAGCCGCCGGTTGTAAG
ATCATTGGTATTGCCACTACTTTCGACTTGGACTTCCTAAAGGAAAAAGGCTGTGACATC
ATTGTCAAAAACCACGAATCCATCAGAGTTGGCGGCTACAATGCCGAAACAGACGAAGTT
GAATTCATTTTTGACGACTACTTATATGCTAAGGACGATCTGTTGAAATGGTAATCCTCT
AAAATCGAACATATTTGAGTTATAATTCTCAGATACAGTCCTATTCTATATTCGCCACAA
AACAAGTAATGATGCTAAAAAACGACACATTTATAAAATCACATCTTATTGATTAAATAA
ATACGTAGATAGATTTTTTTTTTTAAAACATATAATGTGCTATTATTTCTGACTCTGTCT
CATCTCAAAAAAATAAATGATAAAAAAGGAAGTAAAATCCTTAAACGTTATCAGGTTACT
GGCAACTTGAAAGTGACAGGAGCCACAACGGATTAAAATTTAATTTCTAGTAAAGAAATG
TCAAGAAGAGTGGTTATCACAGGATTGGGCTGTGTAACGCCGTTGGGAAGATCATTAAGT
GAGTCATGGGGGAATCTGCTCTCTTCCATAAATGGACTCACACCAATCACATCTTTGCCC
AACTATAATGAGGACTACAAACTCAGAGAAAAAAGTATCCCATCAACGATAACAGTGGGG
AAGATTCCAGAGAATTTTCAAAACGAAAATTCAGCCATCAATAAACTGCTGTTCACTAGC
CAGGATGAGAGAAGAACCTCAAGCTTTATCAAGCTAGCACTACGTACAACTTATGAAGCG
CTTCACAATGCTGGTCTCTTGAACCCAAATGATATAACCATCAATACATCTCTGTGCAAT
CTGGATCACTTTGGTTGCCTGATAGGTTCTGGTATAGGATCCATTCAAGACATATACCAA
ACTTCTCTACAATTCCATAACGACAATAAAAGAATAAATCCATATTTCGTCCCTAAAATC
CTTACAAATATGGCAGCTGGTAATGTTTCCATCAAGTTTAACCTTAGAGGATTATCCCAT
AGTGTTTCCACAGCATGCGCAACAGGTAATAACTCCATTGGCGATGCATTCAATTTTATT
CGGTTAGGCATGCAAGACATCTGTGTCGCCGGTGCAAGTGAAACGAGTTTGCATCCGTTA
AGTTTAGCAGGTTTCATCAGAGCAAAGTCGATTACTACAAACGGGATCTCTAGACCCTTT
GATACACAACGTTCTGGATTCGTACTTGGTGAAGGATGCGGAATGATTGTCATGGAATCG
CTAGAACATGCTCAAAAGAGAAATGCAAACATAATTTCTGAGCTCGTGGGCTATGGTTTA
AGCAGTGATGCCTGCCATATTACCTCCCCTCCTGCTGATGGAAATGGTGCCAAAAGAGCA
ATAGAGATGGCTCTAAAAATGGCTAGATTAGAACCAACTGATGTTGACTACGTCAATGCA
CATGCTACATCAACTTTACTAGGCGATAAAGCAGAGTGTCTGGCAGTAGCCTCAGCACTC
TTACCAGGAAGATCCAAAAGCAAGCCACTGTACATATCCAGTAACAAAGGTGCAATTGGC
CATCTTTTAGGTGCAGCTGGCGCCGTAGAAAGTATATTTACAATTTGTTCCTTGAAGGAT
GATAAGATGCCGCATACCTTAAACCTGGACAATGTTCTGACTCTAGAAAATAACGAGGCC
GATAAGCTACATTTCATAAGAGACAAACCTATTGTGGGAGCTAATCCGAAGTACGCATTA
TGCAACAGCTTCGGATTTGGAGGAGTTAACACATCTCTTCTCTTCAAGAAATGGGAAGGG
AGTTAATATTATTAAACTTATATATATATCCCATTATAATCGTTTTTGAATTATATGCTA
TCTATTCGAATGTCGAGATTTATCTATTAAAACCAATCATTTCAATGATTAGCAAAAATA
TTAATCAATTAACATTTAGTCATCGACCGAAATATTTGAGCTCAAAGGGTCTAGCAATGT
TGTAAACTATAAATGCCCAACTTAGTCCTAACTCGAATCCAATATCACCACCGTAGTCTC
CGATCAAACGGCTGATCTCGCCAACCCAATAAGTTTGGCACATACCCAACGCTACGCCAA
AGGCACCAACAATTAAGGCAGCAGTACCTGCAATGCCGATAGGTAGACGTTCCCAACTAT
CCCAATCATCAACATTGTAAGCACTGAAGGAACGCCTATAAATAAAATGCTCTGAACATG
CAATGGCAATATAAATAGCCAAATAATAACCTATGGAATCCATGAAGTAATTCATGAAGG
CAGAAAAATAGTAGCAGGCAGGAATGGCAATACCCAGTGCGGCCGCATTGCCTAATAAAG
TCCAAATAACTCTTGGGACTTTCGCAAGAGGTTCCCACGTGGCTTGCACCGATAAAGCAA
TAGTATACATGTTGGGAACATTATTAGCGATAGTGGACAGAGACAATAACACGCAACAGA
ACTGACCGAATCCGTGAACAGAATTAGGGACAAGAACGGCAAAAGTTAAACCACCTATGG
AATTTTCGTCATAATACGTCTTCCAGGCTGGATCGCCGATAGCTGCCATTGCTACAGCTG
CACCAAGTATCATAGTAAAATATAATGGTGTTGCTAACCCAACTACAAGCGAGAAAAAAA
TTTTATACTTGTTCGTTTTCCTTGGCATATAAACGGTATAGTCAGCCGCATATGTTGTCC
AGCCTGCAGCAAACCCATAAACTGTTGATCCAAATGAAAGCACGTTACCTGCTGTAGTAG
GACCAGATGTCCACTCCCCAAGGACAAATTTTTTAGACCTTGCCAAACGAGCAATTATTA
CCAAAAAAACGGCAAAATTTGGTACCCACGCCCATTTCTCGTAAGCATGAATGACTCCAT
AGCCGAAAAAAGTTACAATTACAGTAGCACCGATAATAACTATACAACCAGCCCAGAGAG
GACATTGATGACCGGGGTTAACCATATTCAGGACTTGCGAGCTTGCTACGGTATTAACGA
TACCCCAACCGATACAGGCAATAAAATTGATGAAAGAGAAGATCCTGGCTGCGATATTGC
CAACTAAATATCTAGACAAAATCATCTGTCTTAGGCCCAGCTCTGCACCGAAAACAGAAA
AGAAAGCAACTGATACCAAGCCTAAGAGGTTAAAGAAAATAATAACGAAAACGCTTTGGC
CGAAATTTAGATCAAACATCATAGGCCCTAGGGCGCCAATGGCATAAGCGGGCAGAACCA
TATTTGCTGAAAACCACATAGATGCAGCGTTCAGTATAGAATCATCAGTTTTTTCATCTT
CTGTAATCGGTTCAATACCCTTTGTCTCGGCACTTAAACCAGCAGCAATTCTGTTCAAAA
ACGACAGTTTAGCTTCAACTAATTCTTCTGTTCCGTGCAATTCTACATCATCATAGAATT
CATTTGTTGAAGGAGTCTTTGCATCGTGAGCTCGAGACTCAAGGTCTTTAAGTTCATATT
TTAAGTATTGAGTGCCGTTCAGGGACATTTCGTGCGTTTGAGGCATATTTGTTAGCCCTT
TTATAATATGGTAGGTTTTCCGAGCACACGCGCCTCAATGCTAATAATAGTGAAGTAACA
AGCACTTTTAATGCTGTGTTTACGTTAGCGCGGACTACAGAGTATCTGTTAAGAGGGACG
TCTACGCCCTTATATATATATACGTGTTACTTCTGACTAAAATTGCTTGGCAATACGATG
AGTGAAAAAAAAAAAGACCTTATCGAATTTTTCTTTCCGTCACATAATGACGCCGGCACC
TTTGCCCTTCTCGTATTCGTGATGAAAATAAGTTAGAATCGGTGAACGCAAAATGATAAG
ATTTCCAAAATGAAAACTCAGTTAGCAGTCAATTTTGACTGCTCCATATACAGTCTATCA
TGCGATAAGCTTGAATAAAATAATATGGTTTTTTTTTTTTCTGTTCAATTTGATGAGGGA
TAAGCATTTTTTGTTGCTGTTGTATTTGAACGGGAATATAGCAACACCATAAAGTGCTGC
TCAACATGTTTCTTATCTCTGAACAATAAAGTAGTCCAAACCGTAATTCAGAATATATCT
TAATACCAAAGAATTACCTAAGAAAGTTACCATGCTTATTTCTTAGCAACCGTACGTTAA
CACATAAGATAATTACTACCTTTGAGAGAAACTGTGTATGTAAATATATCTACTTGCATA
TTACGCATTTCTACATGCCCGTAACTAGTGCTTGCGATTGAGCTTTTGCGTTGTTCCAAA
ACCTGTATAGTAAGTCCGCGTATCTCTGCAATTCATTGACTGATATCAAAAGTTCAAAAT
CACACAAAACTAGAAACTGCAGTTCCAAATGGTTGAGTTCTTGTAAAGATATCCCTCCTA
CCCTTGAGTATCTTGAATTGCTATAGAAGAAATCGCTCAGAAACTTCGTACTGACAGTAA
TACCTGCTATGATTAATCTGTGAATATTATGTGAATCCATTACGAACATTTGAGGATGAG
CCCTTGAATCCCTTTGAACTCCTGTATTTTCATCATCTGAATCGTCATTTTCATTATTTT
CGTTACTGTTACATGCGGACATTTTGTCAGCGCCCCTGTTAGCTTTATCTAGAGAGCTTT
CATTTGAGGGAGATTCATGTTTTGCAGTATTAGTTTTAGGGGTCGTAGTGACACTATTGC
ATCTCTTGAATATTCTATCAAAGTACACGAGGAGCGATAAAAATACATCATTCGTTGTGG
GGCAATATTTCTGGATCCTCTGGAAATATTGGTCAAGACCAATTTGTGGTACGTGCTTCC
CTCTAAACCCCAGAACGGGGCTTAAGTATTTCTTTTCATTGTCACTTAAAGCAAGACACC
TACCATTCTCAATCTCTTGTGTCAAACTAGGATTTGTCGCTGCCGTCCTATCATTTGACT
TAATAATTTTAGTTAGTAACGCTGTCAGCATTTTAAGAAGCTTGTCTGTGGGAAACTCTG
CAATGTTCAAAGACGGGGTTACTTGTGAGTTGCTTGTGTCACCGTCGAGTATTTTGTCTT
CCTGGGTGGATGATTGAACTGTATGTGTGCCTTGCACTTTCTCATTTAAATTATTTGTGT
CGCTCAATTGCCTTTCGTTATTCTTTGGGAATCGTACTGGATAATATTTGTTAATTGTGT
TCATATTTGAGCCATGTACCCTGTTATTCATTTCGACCCTAGCTTGGTTAGAAGCATCCT
CATAGTTAAAAGATGATTCTGGTCTAATTCCCATTGATGAAGTAGATGATTGTGATTCTA
AAGTCTCTTCAGAAGCTACCCTCGTCACTACCACAATATCGCGTCTATTATTACTGTCCT
GTTGTGAATTATCTGTACGTATATCGACGTTACCACTGCCAAGGTTTGCTTTATCATCCG
ATTGTATTGAATATGTAGACTTCAGACTACTACTGGCATTTGTTGATGAGGGGGAATCAC
CTTTGATAGACATACCGGCGCTATTTGCTACAATTAACTTAACTAATAACTGGTTCAATA
CTTTGCAAAAAAAAAAAAACAGTTCTATGATGAGGGATGACTACGTAATATATTAACTGG
AATTCCGCGCGTTATGATTTAGAAAATCTTTCACTAGTTTAGCTCACTTACGGTTGGTGC
TATTGCAATTACCAATACTGTTTTTTAAGGTTCTATCAAGGTTAGCCTTGTTATCTCTTA
GGTAAATTACGTTCATTCAGATTTTTTCCGCAAGGGCGGAAGAAAAAGAGCCACATCAAG
GCGAGATCTTACCTTAGAGATCGTCGAGAGATTGATTGAATGGAATTTCAAAATAGAGGT
AAAATCCCCAAAGGGGCAGGCAGGCACATTAAGGTCTTGATTATAGTTATTGATTAACAT
TGATATTATTCGAGTTTTAGATTATTCCTTCAATTTGAAGGCTTCTTGGAAATAATTACA
CGATTCTTACATATATACAAACAAGAGTAGTCTATAATAGAGAGGTAAACTACTGCCGAC
AGGTGTTTATTTCTTAGATTCTTTAACCACCTCTCCATCTTTGGTCACAACTTCTCCACT
AAGCGGTTGCATAGTCTCATACTTCTTTCGCAACTCTTTTTGTTCCTCGTGTTCACTCAT
ATTGAAGTACCTTTTCCTTTCTTTTGTGGGATCTAATGATGCAGCTCCGTTTGTCTTTCT
CAACCTCTTTTCTTCGACTCGTTTAGCATCTTTTATCGGACCCTGATGCAAAGTTTCCCT
TTCCATTTCTTGCACATAATGCACGCCCACTACCGTCGCTGCCGTTATCAGACAGGAAGC
TGCAAACGTTATCTTGCTAGCCCTACTCATCTCAGCCGAAATTGACGTCTCCTACCGTGT
GTACCGTCGTTGAATGTCAAATGTGTCCGTTTACTACGACTACCTGAATGCTAAACATTA
ATACAAATCAAATACTGAAAATTTAGGGGTAACCCCGAAAAGAGCCTTTAGTAAAGTTCG
ATGGATACGATCGGAAGATCACTTAGAAGATTATGGGCGGATTGATGGTACGAAGAGTAC
ACTAATCTCTCATTGACATATGCCAACAGCCGTCTAGTAATTACTACTCTTGGAAACAGC
GGGATCATATAGCAATATATATATTTATATATATTCAAGGCACATATATAGTCCAAACAT
GACTCACGAGTGGAGTCAAGCGCCAAAATTAGTGGTTTCAACCGATACTGAGCACACAAT
AATTATTCTTTTTATTTCACCATTTTAACCATTCTAATCCGGTGTCCAATAGTAACATGT
TGCTATTTCATCGTGCTCACGTGGTTTCATTATAACTCCTTTCTCCATAGCGCGAGCTGC
TGACCTACAAAAGAAATACTAATTTACTTCATTATCAAACGGATACATGATAAGGGACAA
CTTTGATATTTGGTTTCCACAAAAAAGCGAAAGAAAATTTATCCTTCGAACATCATCATT
ACTTTAGAATTATGGTCACCACGCTAACTCCCGTTATTTGTGAATCCGCTCCAGCTGCTG
CGGCTTCATACTCCCATGCCATGAAAGTGAACAATTTGATTTTCCTTTCTGGCCAAATTC
CAGTGACCCCAGACAACAAGTTAGTTGAAGGTTCCATTGCTGATAAGGCTGAACAGGTGA
TTCAAAACATTAAGAATGTTCTAGAAGCAAGCAATTCCTCATTGGACAGGGTCGTAAAAG
TTAACATTTTCTTGGCAGATATCAATCACTTTGCTGAGTTTAACTCCGTTTACGCCAAGT
ACTTCAATACTCACAAACCTGCCAGATCATGCGTTGCTGTTGCAGCATTGCCATTAGGCG
TTGACATGGAAATGGAAGCCATTGCTGCCGAAAGAGATTAAGGGCAAGTCTTAATAGCGT
CTTTTAGAACTTAGGATTTTACTACGTATTTTTTAGCTTTATAATATAAAGCCCATAGAA
GTATGACTTTCATCACCTTCCCATCTGAAGAATGTACATTGTACATTGTATACTAATTTA
CTTGGTTCCTTCTACAAATACGATGCTCTTCGAGGACTGTTTTTTCCATTAAACATTAGG
ATGTAAAGGTGTTCTCAAATATATAACACATTTAGTGGTATGTATGGGTGATAAATTTTT
TTCCGTATATTTTGAAAAAAAAAGAAGCTTGACTTTCGCTGTTCCCGCTTACGACTACGC
TCCCCCGCTAGGTTCCCTTTAGGCCGTCATTTTCTACTGAGCCAAGGCGATTCTGGTAGT
TACTCGCGCTTGGTCCCCTACCAACGAGTCGCCTGGTCGACGCTTCCTCCGTGTAATTTC
GTGAGCCTAGGCGCAGAGGATATTATCTAGAAGGAATTGAAATATTATAGATTAATTACG
CTTGGTGTTAAACGGTATTAACGAGTAGACTGCATAACAGAACAACCAAAGATGGCCCAA
CGTGTTACTTTCAGAAGAAGAAATCCATGTATGTTAAAGGCACACTTATAAATTACGAGA
AATTCTGACGAGATGATGATTATTCAACTAAAAAAGAGCAAGAGAGGAGAGGATACCATG
TCAGGGGACCTAGTATAGTTATCAAAAGCAATTTACCCCGTTTTTGTAATCCACTATCAA
TAACTTATTCTGCGCGAACACCTATTGTGTCCAGAAATAATACAATATTGGTAGCAATGA
GAAGAAAAACGATAGTTAATAAGAGCAGCAACTTTTAACCCTGATGCTGACTAGAGCTAA
TAATCTCAATCTGTGTTACGAAAATTTCTTTTAAAGTTTTCTCGAACTCCTTCCTATTGA
AACATTTCGTACTAACATATTTTTCAAATGAGAAAGTATACCAACTTTCTGAAAACATTT
TCAAATAGACAACACCCGTTCTAACAAAATCAAGGTTGTTAAGACCCCAGGTGGTATTTT
GCGTGCCCAACATGTCAAGAAGTTAGCTACCAGACCAAAGTGTGGTGACTGTGGTAGCGC
TTTGCAAGGTATCTCTACTTTGAGACCAAGACAATACGCCACTGTTTCCAAGACCCACAA
GACTGTTTCCAGAGCTTACGGTGGTTCCAGATGTGCCAACTGTGTTAAGGAAAGAATTAT
TAGAGCTTTCTTGATCGAAGAACAAAAAATTGTCAAGAAGGTTGTCAAGGAACAAACCGA
AGCTGCCAAGAAATCTGAAAAGAAGGCTAAGAAATAAACTTTAAGAAAATGTTACTTTTC
TTATGTACCTAATTAACTGTTTTATATAAAGCACGAATAAAAATAATTCATATCACAAGA
AAACTTTCATGGCTCTAGCGCTCTATGAATAATGCTTTTTGTAATGTTGTCGAGCTACTA
TTTCTTCATTAATCATCGTCATCCATAGCCATGGGAATTTGGTAGTCAATCGCCTGTCCA
ACTGTAGACGACGTAACTCTGCTATAAAAAAGACCTGTTCATATTTTATTTTTTTTTTTC
ATGTGCCACGAACAATTTAATGTATGGGAATACAACTGCAAAAGAAAAAATCAAAAAAAG
AAATCACACACCACAAACACCAAACATTATGCCAGAAGCTTCCGCCAAATCCTGCGTCGA
TTAAGTTAATGTGAACACCACCTCAGATCTAACACTGATGAAAAGCCTTACAAATCTCAA
CACATCTTTTCCTTTATGAAGAAGAGTGCCTTGCACAACCATACATACAGGAACTTGATA
AAGCCTACAGATAAAATCCAAGCGGAAAATAAACAAAAAATCCTAGAGAATGCTCGCTGA
AAAAAAAAAAAAAGATGTCAAGACAGATTACGTCGTAAATTCAGCCACTTTCAACCAAGT
TTCCGTAATCATATTAATTTCTGAAATTAATTAATCTAACGTATCTCATATCTTTTTTAA
GTGATTTACCTGTGGAGAACAGCAAAGAAGTCATCCAATACAGAAAATCGATGGATACTG
GTCTTATTCGGTCAAAGTGACTGCAATACTCCTCTGCGGATTTGCTTAGTGTTAGAAAAT
CGAGCGGCATGTTTTCTTTTGTCACCAATGGAACGGCCTCAAGGAACTAAATATCAGTCG
ATTTTATCGCCTTTCCCGAGTGGGGGGCGTATTCGTACAAATTGACTCTTTTTCAGAAAT
GTCTGCCGCCCGCGTTCGGTCATTAATGCACAGCTTTATCGCGATTGCCATTGACTTCTA
CGTACATATAGTTGCTACGTCTTCGCCTTATCAATAAATAATTATGAGTCTTTAATTTCT
TTTTTTTCATTGTCAGAATTTTTCATGTCCTTTTTTTTTTTTTTTTTTTTTCTCGGTGAT
CAAGATGTTAGGGAACCAACCAAGATAATGGTTTTAATATAAATATCCATTAAAAATATT
TAGACAGTAAAATAGTGGTGAGTCTAAAACGCGTTAGAGGCATTTTTCTTTGAAATGTAG
ATAAGTAAGCTTAACTGTAATAGTATTCACAAAAATATCCATATAAATTTCGCATATAAA
ACATCCTATCCTCTATTATAACGATTTATAAGAATGTTGGAAGAGGGAAATAATGTTTAC
GAAATCCAAGACTTGGAGAAGAGATCTCCTGTAATAGGGTCAAGCTTGGAAAACGAAAAG
AAGGTAGCCGCTTCTGAAACTTTCACAGCAACTTCCGAAGATGACCAACAGTATATCGTT
GAATCATCAGAGGCCACAAAATTATCGTGGTTCCATAAGTTCTTTGCCAGTTTGAATGCA
GAAACAAAGGGTGTTGAACCAGTTACAGAGGATGAAAAAACGGACGATTCCATACTGAAT
GCTGCGTCCATGTGGTTTTCAGCTAATATGGTCATTGCATCATATGCTTTGGGTGCCTTA
GGACCCATGGTGTTCGGTCTAAATTTTGGTCAAAGTGTTTTAGTTATCATATTTTTCAAT
ATAATGGGGTTGATATTTGTTGCGTTCTTTTCTGTCTTTGGTGCAGAACTGGGTTTAAGA
CAGATGATTTTATCAAGATATCTGGTTGGTAATGTAACGGCAAGAATTTTCTCTCTTATT
AACGTTATTGCTTGTGTCGGTTGGGGTATTGTGAATACCTCAGTATCCGCACAACTGCTG
AATATGGTGAATGAAGGCTCTGGGCACAACTGTCCTATTTGGGCCGGTTGTCTGATCATT
ATTGGTGGTACCGTGCTTGTGACTTTTTTTGGTTACAGTGTCATTCATGCATACGAGAAA
TGGTCATGGGTACCCAATTTTGCCGTCTTTTTGGTTATTATTGCCCAACTATCGAGATCA
GGAAAGTTTAAAGGTGGTGAATGGGTAGGAGGTGCAACTACTGCAGGTGGTGTTCTTTCT
TTTGGTTCATCTATTTTCGGTTTTGCCGCAGGATGGACGACCTATGCAGCTGACTACACT
GTTTATATGCCAAAGAGTACAAACAAGTACAAGATTTTTTTCTCCCTAGTCGCTGGTCTA
GCGTTCCCTCTATTTTTCACCATGATTCTTGGTGCTGCTTGCGGTATGGCGGCCCTTAAT
GACCCAACCTGGAAGTCATATTATGATAAAAACGCCATGGGTGGTGTCATATATGCTATC
CTGGTCCCTAACTCTCTGAACGGATTTGGTCAATTCTGCTGCGTTTTGTTAGCTTTGTCC
ACTATTGCAAATAATATTCCAAATATGTATACTGTTGCTTTATCCGCTCAAGCTTTGTGG
GCACCTTTGGCTAAAATACCAAGAGTAGTCTGGACAATGGCAGGTAATGCTGCCACTTTA
GGTATTTCCATCCCTGCTACCTATTACTTTGATGGCTTTATGGAGAATTTTATGGATTCC
ATTGGTTATTATTTGGCTATTTATATTGCCATTGCATGTTCAGAGCATTTTATTTATAGG
CGTTCCTTCAGTGCTTACAATGTTGATGATTGGGATAGTTGGGAACGTCTACCTATCGGC
ATTGCAGGTACTGCTGCCTTAATTGTTGGTGCCTTCGGTGTTGCATTGGGTATGTGTCAA
ACCTATTGGGTTGGTGAAATTGGCCGCTTAATTGGTAAATATGGTGGTAACATTGGGTTC
GAGTTGGGTGCAAGTTGGGCCTTCATCATCTACAACATCTTAAGACCTTTAGAATTAAAA
TACTTCGGTCGTTAGGAAGTAATGATTAGGGCGATCATTTCCCCGTGCACATTTCACGTC
ATGTATCATAGATGCAATTTCATGTAAACTATTTAGACATCTCATTTAATAAAAATAGCT
ACAAACTGTATTTTACAATATTAGTAACATACCAAAGATAATCTCTATGGTATATACAAA
ACTTCAAAAATGCCAAGACAATTTGCACGGCTGCGACCTAATTGAGACTTTGTGGCCTGC
ATATCAGTCTTACAATAAAAGCCAATAAGAAAAAAAAAAAAGTAAGAATGCACAGGTGAC
TAGTGGTTATGTGACTATGTGAACGTAAAGAGAACGAGATGTAACCCGGCAACCCGGCTA
GAGAGGTTGTTTAGCATGCGAGGTATTAGACTCCTTGTCAAAAAATTAATTAAAATATTT
ATTAGTTAATTTATTAGTTGCAAAGTCATTGATAACAGCGTGACTCTTCCCGGAAATTCT
TTCATTTCGGCATTTCGAAGCGAGACCGCAAAACACGTGTACCCACGTAGCCAACGATTG
AAAAAAAAAAGCTTCCAAGTGAGTCACCTCTACCGTTGGAACTTATAAAATGTTTTTGCA
GAATATACTCGCCTGAAAGTCCATTTATACGCAGTGAACTGCAAGTATTTACTATCTAAA
CTTTGGCATTTTACTCCTATTAACGGTTTGAATCTTTGAAAATAGAAAAGAAAGGATAGG
TTTCTAATAAATTCAATAGAAAAATGGATTTGGTGAACCATCTAACCGATAGACTACTGT
TTGCAATCCCAAAGAAAGGTCGTTTATATTCTAAAAGTGTTTCTATTTTGAATGGTGCCG
ATATTACCTTTCACCGCTCTCAAAGATTAGACATTGCACTAAGCACAAGCTTACCTGTAG
CGTTGATCTTTCTGCCCGCTGCAGATATTCCAACTTTTGTTGGTGAAGGTAAATGTGATC
TTGGTATAACTGGTGTTGACCAAGTTCGTGAATCTGACGTCGACGTAGACTTAGCAATCG
ATTTGCAATTTGGTAACTGTAAATTGCAGGTACAAGTCCCCGTAAATGGCGAGTATAAAA
AGCCAGAACAGTTAATTGGCAAAACCATTGTTACCAGTTTCGTGAAACTTGCTGAAAAAT
ACTTTGCCGATTTGGAAGGTACTACTGTTGAAAAAATGACCACAAGGATAAAGTTTGTCA
GTGGTTCCGTGGAGGCATCATGTGCTCTGGGAATTGGTGATGCTATTGTAGATCTTGTAG
AGAGTGGTGAGACAATGAGGGCAGCAGGTTTAGTTGATATTGCCACCGTCCTCAGCACAA
GTGCCTACCTAATAGAATCAAAGAACCCAAAGAGCGATAAGAGTTTGATTGCTACTATCA
AATCAAGAATTGAAGGTGTCATGACCGCTCAAAGGTTCGTTTCATGTATTTATAACGCAC
CTGAAGACAAGCTGCCTGAACTGTTGAAGGTGACGCCTGGCCGTAGAGCACCAACCATTT
CCAAAATTGACGATGAAGGATGGGTTGCTGTTAGTTCCATGATTGAGAGAAAAACGAAGG
GTGTTGTTTTAGATGAATTGAAAAGACTCGGCGCATCTGATATCATGGTTTTCGAAATTT
CTAATTGTCGTGTATAAGATAGAACAGAAAAAGGGAAGCCAAATCCCGATTAATTTTGTA
TTTTTTATAGGCAATAATTTGATAGAGTTCTATCTTATTCTAAGTTACCCCTCATGACTT
CCCAAGTGTGTTTTGAGGTTATCTCTGTGAATATTTTTTTCTTTTTTTTTGCTACTTCCC
CAGGAAGTTAAATCTTCGTAGCATATTTGTCAGCTTTACTACCGTCTTCATGCTCATGAA
ACCTTCTTCTTCAACCCCCTTCATTTCTCCAATTTTCGAAAACTGGAGCTACCCATAAAT
ATTCGGAGTTTTGTAGGTATTTTTATTTTGGAGAAAACCTGTACAAACTCTCCCCAGGGA
GCATAGATTGGGGATCGTAACGCATAAAGCTGTCTAGAATGCATTTTTCCATGCTACGTC
GATTTTTTGCCCGGAAGAGGCTGACGTAGCGCTGGAAGGTACCGACAACTATGCCTATTG
TGGAGATGGGCGGCAAACTCCTGTCGCAGAGTGGGGGCGGGGAAAGGTTCTTTTTGCCGT
GGAATGAAGCGCATAAAAGAAAAACAGTATGCCATATTAAGTCTTTTTAAGGGAAAGGGG
CTGCTACCATGAGGTCTTTTACCAAAAATGTGTATCAGCTACGCTTCTCAATGAAGGGGC
CAAGAAGTTCGTTCTATCCAACAGAAAATATTTCGATATTGCAACGGTCTTTCTATATCT
TGCATATTCTTCTTCAGGTTGAGTTCCTTTATATATACTGCATTGCGTAATAAGCAACAC
AGGGCCCATCCGTTCAACAGAAGAAAACTAAAGCTTTTCAAACATAGCCTTTCCAGTTCA
GTGCATATTTATAGAAGGTAAACCTGCATACAATACGGTTAAAACAATAGGAACGAAAAG
AAAGCTAGACGGGAAAGCAGTTACTAAAGGCAGGGTTGACGGGACGTTTAAAGAGAGAAG
TCTGGTTTATAAAACCTTTTAGTAGTAAAAAAGGAAAAGAAACAAGGAAGGTTGGCATTC
TGTTTGATTGAGGAGAAAGGAACCACATTGGACTTTTTTTTTTCTTTCTGTAAGGTATAG
TTTTTAGTAGGCTGAACATCAAAAAGATCTCCGTTGTACTCAGAAACAAGTTTAATAGGA
ACGGGTACAGATATCTTGTAAAATTTTATTCTTACAGCCCAAGTTTATTAGGATTTCATC
AACGCAACAATGTATATAAAGGCAGAACAGAAACCCCAACAGTTTGAGAGGAAGAGTGAA
AAACTAGACAGAAATAAAAACCAGCAGCTACCAGATCTTGAAACAGATTTCAAGGGTTAC
AGAGTGAATTCGGACCTATACAACAAAGAACGAGATGGGAGTACGGAAGAGACTTTAAAC
TCTTTGAAGTTTTTACATAAACCTCAGAGAGTAACTCAAATGAGAGCGAACAGGTTCCCA
GAGGAAGAAGTACAAAGAAACACTGATTTAAACAAAAGAATTTTCTCCGCAGGGAATGAT
GAAAACGTTGATAATGAGAGCGGCTGGTCAAAAATTGCCGCTGCCAAGAATCACACTTCC
GTAGAATCATTAAATGGCAGTACGAGACCCCCATTCAAAATAGAGCTGCCTCCCCTTTCC
CCCAAATCCACCGTACCAAAATCTTTTCAAGCAGAATATCCCGAAGCTAAGTCACCTGGC
AATGATATGAATTTTGAATATGATGAAGAAATTCTAATTCCATTTGCGCCACCTGTATAT
AAAAAGTCAGGTGAACTATTGAAGAGCTCATTGAAGAGAAGATCAAAATCATTACCTACA
ACCCCAGGTATAAGGAGCGGGAATGGTGTCCAAGCAAGAGACGGTAGTCCGATGTTGATT
AGGAGTAAGAGTGTTCACTTTGATCAGGCGGCACCTGTAAAATATTTTGCTGAGGATGAA
AGCCCTATAAACGTTAATAAAACTGAACAACACGATAATTGTCTAAGCTTTAAGCATAAG
CCAGTGAATTTAATGGTGGACCCGGAAGAAGAGACAAAAATGCTATCATCTGGATTAGAA
ACGACATCCATAGATGATGACTTGACGACAGTTGCGCCAAAAGGCTTCGCACATCCTGCT
AAAATTTCGAGTCCAAACAATGGTAAAGGCACCAACAATACAAAATTAAGAAAAAGTAAA
AGATTTCAGAACCTCCTAAAGAACAGGACCGACATGCCACCATCAAAATCAAATAAAAAA
TTCGTTAATGGTGGCGGTGCTCATGAAATTTCAGATCGTAATTCAAAAAATTACCATGTT
GTTGGATTATACAGCAAGAACTTCCCCATTTTAAGCAACAAGAATCCTAAAAGTTTAAAG
CTGAACATTTTTATCAATTTATCACAAAATAAGAAAGTTTTTCTACAAGAATTGTCATTA
TACATCCATAGAGACAACAATTACTTTTCAAATTCCTCCTCATTTAATAATATTCCCAAT
AGCCACAATGGTAATGACTGTAATGGTGTGGCCAAGGGTTATAACGCTGGCTGTACAAGA
TTAATTGCTGGAAGGATACTAGTGAAAAACATTTTATATGATAAAAGAGTGGTGGTACGA
TATACGTGGGATAGTTGGAGAACAACACATGAAGTGGAATGCGTTTACATCAGTGATGGC
GATGGAATATTGCCGGGCACTAACATGGACATTTTCCACTTCATTATCGATGATGCCAGC
AAAGTGGATCCTCGCGGCAAGTTAGAATTTTGCATTCATTATTCTACACGTAACGACTAT
GAGCGCGAAGAGTACTGGGACAACAACAACGGGAATAATTATAAGGTGGATGTTGTAATG
GATGGCTTTAACGATCCCTTCACGGCGGCAGCATGAAGGCAACCAAAAGGAAGGAGATGA
AGAATGGACATAAAAAGCAAAATGACTTGCTAGATCTTGGCCTGAGTTACTCTCATGATT
GGGACCGAACTCCGATAAATAACTCTAAAACATGCTAGAATATTTCAAGTAAATATACAT
AAATCACAAATAAGCAAATAAACAGATAAATATCTCACAAGAAATCGGGAGCCGATCTTC
GATGTGTGTGGGCGTATATACAAATGTGCATTCGGCACGTAAAAGACTGGTAAAGGCTAC
TGTCCTTCAGTGAGCATTTTTTACATTCATTCAACGCTATACAGCTCTTACTGTGCGACG
GAAACGCGACAAAATGTGAAGAGAAAACTAGGGGTTGCTATGACACGACCACGGAAGGCC
TAAAAAGTTAAGTGACAGAAATCGTCATTGGTAAAAAAAACCCCGAACATGCCGATAAAG
ACTTGCTTATTCACCTACGATGACTTCAGAAGTGCGCCTATATTTCTTTACTTTTGAACA
CCCTTCCACCGCCCATTTAGAGAGAGCTATTTTTGTGCCTTCACTTCCGGCAGAGGTTAT
ATTTTTTTTTTTTTTTTTTTTTTTGCTTACTACTCCTACTTCTTTCTACAGTCTCATCCT
GACGCTTCAGTTTGAAATGTAAGGGACTGCGGCATTTGACTGAAAGAAGGGAGAATGGAT
GGTTTACTTTACTTTTTACGTAAGGAAAAATAAAAAGATTGCTGTATTAGGACGTCCCTG
TTCTTTTATATGGTAGCCTATATCCGATAACTGTTCAGCTATAAGACGTGAAGAGAGATT
TTTTGGTACCCCTTATGCATTCAATTAAATAGAGAATTAGATATTTCTACCGATGAGCAT
TTTGTATATAAAGAAGTAGGAATCCCTTCTACAACGACAGAGGTAGACATACTGCTTGGA
AACATTCTTTTCGTCCTTTTACAGAATTCTACATAGAAATAATAAAAACAAACAATAGCT
TTACTACACAGTACACACTACAATGCAAGATTTAGAGATTTTTTTGAGTATTTTCGCTTT
CATTTTCGTTTTCTACTTTGGTGCTCATAGAACAGTCATGAACAGAAACAAGAGCGATGT
TCCTTACTTGCAGTGATTTAAATCAGCTAATCTGCTTACTGCCGCCAAGAGAGGTATGCA
AAGTCAGTTCTACCTAGTCTGGCTTAGCGTTTTACTATTTACGAAGTTGATGTTCTGTTT
TCTAATTTATCTTTTTTCTACTCATTCATTTCCACACTACACTTAATATTTTTTCAATAA
TTTTCGATGTTTTTAATCCGGTTTTCTATTGATGAGCGCCTTCTTAGCTCATACTTAATA
CACGTTTTTTAAGATTTATACGTTTGACAGCTCACGCTGTTTGACCAAAGTTATTTTCAT
TTTTATGTTCGTAATTATGTATTTTTGCTATTGTATATGATATACGTCTATATTTAGGCA
ATTATAATATGATTATAATATAACTTACTACATCTCTAAAACATGCTGTCTAGCCCTTCC
ATCGCAAGACTCGGCTAAACATTCGAGGAAGGCACAAAAAGCCACCTATCCCCATCTCTC
CAAAAAGCTTCATTTCGAAAATAAGAAGGGAAACATCCGAATAAGACTAAAACTTTGTTC
CTTCAATGACTACTAAGTTATTAGATGTCAGAAATCCCGCAAAATCGCCCGCATATCAAG
GTAAGCGGCAAAACCCTATTCTTGAAAAAATGTAAATACTAACCGTGTGAGAATTTTAAC
GGTGTATTCCAAAAAGTCAGCACGTGATCTGCTAAGAAATCCGAACCTCGGCCTTTGTTT
TTTTTTGTTACAGCATAGGGAAAAGACGCATTGTGTCAAAAAGGAACATCGTACCATTAC
CCTCTCAGCACATAGGTAATAAGGTGACAAGTAGCAAGTGAAAAGTACCGCTTACGAAGA
ATACTTTAATTCAACGTAGATACTGCAAAATGTTCAAGTCATTATTTTTGGCCCTCAACT
TGCCTTTCCAGTTCTTAGATTCATTCATATGCTAGCTAGCAACAACGGTCACTTTGGGTT
GCATTTCAAGCATTGGACAATCTCATTCGGCTAAGATCTCGGCTAACCAAAAGTTGGACT
TCAGGGGTATTAGCGAAATAAGGAGATCTTTTTTAGGTTTATTCCTTGTTTTTAGTTTCA
TTTTGCTTAATAAAAAGGAAAATGGATATATCGATTTTCTGCATACCCTGTTACATTTGA
TATAAATACAGCGGGACCTACCAAATATACTTTCATTTTGCTTGTGTTTTATAGATATTT
TATTTTTTTTCCAGGCAGTCAATGACACATTGTTAACTGAAAGTGTTCTGTTATTGTTTT
AATTCTAAAAAAATAAAGTAAGGGAAAAAGAGAACGGACTCATTGACAGTTGTAAAGCAT
GGAGTCCAATAAACAACCACGTAAAATCCAATTATATACGAAAGAGTTTTATGCCACATG
TACCTTAGGTGGTATAATTGCGTGCGGTCCAACACATTCTTCGATCACTCCACTAGATCT
TGTCAAATGTAGGCTACAGGTCAATCCCAAGTTGTATACTTCAAACTTACAAGGGTTCCG
TAAGATTATAGCTAATGAAGGCTGGAAGAAAGTATACACTGGGTTTGGTGCTACATTCGT
CGGATATTCGCTACAAGGTGCAGGTAAGTATGGTGGTTATGAGTATTTCAAGCATTTGTA
TTCTAGTTGGTTAAGTCCTGGTGTCACTGTGTACTTGATGGCCTCAGCGACCGCTGAATT
CCTCGCTGATATCATGTTGTGCCCATTTGAAGCTATTAAAGTGAAACAGCAGACTACTAT
GCCGCCCTTTTGCAATAACGTTGTTGATGGATGGAAAAAAATGTATGCAGAAAGTGGAGG
TATGAAAGCATTTTATAAAGGTATTGTTCCCCTATGGTGCAGACAGATTCCTTACACAAT
GTGTAAGTTTACCTCATTCGAAAAAATTGTTCAAAAAATATACAGTGTTTTACCTAAAAA
GAAAGAAGAAATGAACGCATTACAGCAAATATCAGTCAGTTTTGTAGGTGGTTATCTGGC
AGGTATATTATGTGCTGCAGTCTCACATCCTGCAGACGTTATGGTTTCCAAGATCAATAG
CGAAAGAAAGGCCAACGAGTCCATGTCTGTAGCCTCTAAAAGAATATATCATAAAATTGG
CTTTACTGGGTTGTGGAATGGGTTAATGGTGAGAATTGTCATGATCGGTACTTTGACAAG
TTTCCAATGGCTAATTTACGATTCGTTCAAGGCTTATGTAGGCTTACCAACCACCGGTTA
GCTGATCGATTCAATCGGCAAGGTTTATCGTAAACACTCTGTGCTAGAGGAATATTGTAT
ACACAGGATTTTATAAAGTTAGTAAATGACCGGCATTTATAGTTTGTTCTTCTTTGCATA
TGTCTTAATAAATATTCGTCCTACAATTTCTTTTCATACTAAGAGTTTTGTTATGATTGC
CAAATTTCTCAAGCCAAGAACAGGCCCAGGAAAACTTTGAAAGTGCCATATCAGAAACAC
ATTTATAAGGTAGTTTCGATATACGGCAATACTCGATGCATGCCCAAACTTGCCAGCCGC
TCGCGATTGAATCTTCTACAATTTTTAGGTGAACATATTCAGAGGCTGAGGCCTTATTTG
ATAGTAACATCAAATATCACTCCCACAATTTACAATCACTGTCATTGGTCTCACAGGATC
CTTTTCTTTCTAGAACTCCCCTAATATCAACTTTTTACTCTACTGTGGCTCTAACCACGT
GTATTTTTCAGGCCCATGACTCACCTTTTCTTTCTTTTTCACTAGCAAACGAAAATTTCA
TCATCACTTTTTTTTTTTTTTCACTTTCCGTACGCAGTCTTCTCCAGAGATTCTTTTAGC
TTCGAAGAAATAATGTATAATATCCATATATAAGAATACTGCTGGATAATTATTTTATTT
CTATTTTAACAGTGCTCTACTCATTGAAGGATATTTGTGTAGCCAATACTCTCTCCATCG
CTTAAGCTCACATAGCTATCGCATTTTATCACAGAAGCTTTCATTTTTTTTAACTTTTAC
ATGCCAATGGATTTCCAACCTACATCAAGTCCTTCGAACTGGGTCGTGCAAAAGTTCGGT
GGTACATCTGTCGGTAAATTTCCCGTCCAAATAGTGGATGACATTGTGAAGCACTATTCT
AAACCTGACGGCCCAAACAATAATGTCGCTGTCGTTTGTTCCGCCCGTTCTTCATACACC
AAGGCTGAAGGTACCACTTCTCGTCTTTTGAAATGTTGTGATTTGGCTTCGCAAGAATCT
GAATTTCAAGACATTATCGAAGTTATCAGACAAGACCATATCGATAATGCCGACCGCTTC
ATTCTCAATCCTGCCTTGCAAGCCAAGTTAGTGGATGATACCAATAAAGAACTTGAACTG
GTCAAGAAATATTTAAATGCTTCAAAAGTTTTGGGTGAAGTGAGTTCACGTACAGTAGAT
CTGGTGATGTCATGTGGTGAGAAGTTGAGTTGTTTGTTCATGACTGCTTTATGTAATGAC
CGTGGCTGTAAGGCCAAATATGTGGATTTGAGCCACATTGTTCCCTCTGATTTCAGTGCC
AGCGCTTTGGATAACAGTTTCTACACTTTCCTGGTTCAAGCATTGAAAGAAAAATTGGCC
CCCTTTGTAAGTGCTAAAGAGCGTATCGTTCCAGTCTTTACAGGGTTTTTTGGTTTAGTT
CCAACTGGTCTTCTGAATGGTGTTGGTCGTGGCTATACCGATTTATGTGCCGCTTTGATA
GCAGTTGCTGTAAATGCTGATGAACTACAAGTTTGGAAGGAAGTTGATGGTATATTTACT
GCTGATCCTCGTAAGGTTCCTGAAGCACGTTTGCTAGACAGTGTTACTCCAGAAGAAGCT
TCTGAATTAACATATTATGGTTCCGAAGTTATACATCCTTTTACGATGGAACAAGTTATT
AGGGCTAAGATTCCTATTAGAATCAAGAATGTTCAAAATCCATTAGGTAACGGTACCATC
ATCTACCCAGATAATGTAGCAAAGAAGGGTGAATCTACTCCACCACATCCTCCTGAGAAC
TTATCCTCATCTTTCTATGAAAAGAGAAAGAGAGGTGCCACTGCTATCACCACCAAAAAT
GACATTTTCGTCATCAACATTCATTCCAATAAGAAAACCCTATCCCATGGTTTCCTAGCT
CAAATATTCACCATCCTGGATAAGTACAAGTTAGTCGTAGATTTAATATCTACTTCTGAA
GTTCATGTTTCGATGGCTTTGCCCATTCCAGATGCAGACTCATTAAAATCTCTGAGACAA
GCTGAGGAAAAATTGAGAATTTTAGGTTCTGTTGATATCACAAAGAAGTTGTCTATTGTT
TCATTAGTTGGTAAACATATGAAACAATACATCGGCATTGCTGGTACCATGTTTACTACT
CTTGCTGAAGAAGGCATCAACATTGAAATGATTTCTCAAGGGGCAAATGAAATAAACATA
TCCTGCGTTATCAATGAATCTGACTCCATAAAAGCGCTACAATGTATTCATGCCAAGTTA
CTAAGTGAGCGGACAAATACTTCAAACCAATTTGAACATGCCATTGATGAACGTTTAGAA
CAATTGAAAAGACTTGGAATTTGAATCCACCTTTCTTCTTCACTTTAATGATAGAATATT
AATTTTCCCTTTATATATATATATATACGCGCACATATATTCACATATATATTAATGTTT
TGTAACCTATATTGGGGCGATTATTCCCTAAATGTAATGTCAGGGTTATACTGTATCAAT
TGCTAAAGTAGATCTCATTCATCGAGAGCATAGGATGAAATAAAAGATACAGGAACGTGG
CGGACAAGAAGAAATTTTACGAAATAAGATCGGCTAAAGCTTTCGCTAAATGCTTCTTTG
AAGTGAAATTTAACGGCTTGTACTTAACTTCAGGTTTTATAACGTATGCATGAAGTGATT
GAATTGCGCAATTAGTGGTCCTGGAAAGCAAATCCCCATCACTGACATCACTAGTGATTT
TATTTTTATCAAGCGCAAGATACTCGCATAATTTACCCATCACTTGATCAAACTTCGGGA
AGGTAAATCTTCTAGGAACCTTTGTTAACTTTTCAATTTCCACAATTTTAAGGTGTGTCT
CCAAATCACGGATGGTTAAAAAGTTGCCTCCAAATACCAAAGAGTCTACTGGTGTATAAA
CTGCATGAATATATCCAGCTGGAATCATAAACAAATCACCAGCATCTAATTCCATCGCAA
TACCATCCTCAAGAATATCACCGAGGAAAACACTATTTTGGTCTTCTTTTAAAGACCACT
CAATATACTTATCTATGTTTGATTGGGTAGGTGGAAATAATAAAAACTTCTTCTGTCCTG
AGATAACGTTATAATAAACAGAGGTACCGGCAAAATCCAAATGAAAATCCGTATAAGCAT
CCTTTACAGACATCAAAATATATTTGGTCACTTTTGGCTTGGGGTCATTCTCCTCCGCCT
TTTCCCCATTGACTTTTTCTAAATGTCCATTGAAACTCCAAATTTTATCAACAAGATCAT
TCTGCCTAACTGCAGTGGGCCTCTCTAGTTCTAATCCCTCAATATTAGAGACTTCTAATG
ATATAACATTCCTTATTCGATCCCTCTTGTCTGGTTCAATATTTGTAAAATATTCATTCC
AAGATCCCAAGTTCCAATTTTCATTCATTTGTGATTGAACGTCCATTACATCAACATGAT
AATCCTCGCCTATCATTTCGGTGATATAATTAACTGTGAGGCATCCATTGTCTGTGCCCA
CATTCGGTACATATACTCCGCTATTCAGTGGATCGATGATCTTGTACGGCACATCTATAT
TATCAAACTTTTCAGCAAAGTCAGCGGCGTTTATAATATTTGAGCCATTTTTCCATTTTT
CAAAAGATTTCATGAAACTCTCCTTATGAGGGTGATTCATTTTATCCCTTTTCGATTCAC
CCTCATTCAAAGCGATATAGTCAAGTAATTTCTTCTTTCTGAAATTATACCGCTTATTTA
TATGACTATCTTCAGGGTTTTCTTTATTCCTTTGCCGCTTTCCTTTTTGTGTGATGAGAG
CGTATGCGGTAAGATATTCTCCTTCCTTATGATTAGGACAACGGTAGCTCTTGATTTGCT
TCGCAGAATTTGGATAAGACAGAACTTCAGAACTTGTAAGATTTGAATAGTGAATGCGTT
TCAAAGGCACGCATTTCACGTGGACCCACTGCGGGCAACTATCACACTTCACCCAAATTA
ATGCGCCTGGATTATCCTTCAACTGGCAATGCTGGCAAATATTGGGATCTTGCATTGCAC
CATAGCTTATTAGTATTTTGTTTTATGATCATTACGTCTTCTTACTCATTATAATCACCC
ACTTCTATTAGATGTTCTATTATGCCTTTAAATTGCATTGTAGGGTAACCTGTTGGGGGA
AAAATATCTAGGATTACTTTACATACTTAAATATGAGTCCATTATTAACAGTGTTACAGT
TTCTAACCAAAAAGGCAAGGTTCTACACAAAACTTCGGATGTTCAAGATGAATGCCACCA
CAGGCATAAAAATTCAAAATGGTATGCAACCTATCATCAAGGGAGCAGTAAGCTCCACAT
TTAAACGTGCTCTATACAATTTCGGTATCAAAGAAAAGAAGAGTGTCAATATTGAAATGG
GGAGAACGCAACAAACTAAGAAAATCGATCAGTCTTTGTCCAAAAAACTTCCCAAAGGTA
CTATCTACGATCCATTTGACTTCTCTATGGGACGAATCCATTTAGATAGAAAATATCAGG
CAAACAAGAACTCAAACAGGAACGATATAATGAAGTCCGGTGCAAATCCACTAGAATTTT
ATGCAAGACCAAGAATACTTTCAAGATATGTGACCTCCACGGGAAGAATCCAACATAGGG
ATATCACAGGCTTATCGGCAAAGAATCAAAGAAGACTATCGAAAGCCATTAGACGGTGCC
AGGCAATAGGATTAATGTGAACTGTACTACACTAATGCTTCTCCACATGAAATAATTAAG
AAAATAAGGCATTTCATAGTTCTGTCTGTAAATATACAATATGTAAAAAGAATCGCAATT
AGATCTTAAGTTAAACTTATATTCATTCTTATATTTCTTTAATATACCCGTTTTATTCGC
TTACTCGAATTTGGATTATGGTAATGATATTCACGCCAGAGGAATAAGCTGAAATTGACG
AATAACTTTTCAAATAATTTTATTACTTCTATTATACAACTTTATAAATATCTAAGCTGC
CATTCACTTAATAAGACGGGTTAATTGTTTACGCTTCATCTTCCTGACCATCTTCATCAC
ATGATTTGACATCCCACTTCATTTTGACATCCCATCTACTAGATTTAGCGCTCCAGCTGA
CGTACTTAACAAACTCCAAAACACTTTCATCTCTCAAGACCAAATTGAAAGTATTCCAAG
CAGGTGGATCATTAATCAATACTGAATCACCACTGTCATCCGCACGATAAACAGAAGCGT
CTTCAACGTCTTCCTTTAAGTATTGCTTATTATCTTCGTCGTCGTCCATCATGTACAATT
CGTAACCACCAAGCTCTCCGGATTCCCAACCGGCAGAAGGTGTCAAGCACAAAGTACCTT
CCAAGACAGCATCGATTATATCTGGATTGCTTTTCAAAAGTTCATTAAAGCGACATTTGG
TGGCCAATGTGAAATCCATTCCTGGCCTAAACCTTCTAATAAGGATTTGCTCACTGACTG
GGCACAAAGAAGTTAGAAGAGCTAGGTATTTCTTGAAAATTGTGCTCTTGTGAAATACAG
CTAGGTCAATCAACGCTAATTCTGCATCAAAATTGTTTTCCCTACTATTTCCGGAAGCAT
CGGAGATAATTTTAATTGCGTCCTTAGTAAACTGAAAGTTTGGCAAATCATTGTTATTCA
GCGCCTCAAGAATATCAGCTTCTGTTTGGAAATTACGGTATTCCTTACCGTCGATGTACA
AATAACGGGCTTTGTGTGGAGGAATAGCCGTTTTCCACGGAGCTTTCACATCTTTTGAAT
GATAAGGACATTCCTGTTCCAACTCTTTTTGTTTGATAACCTTCTTTAACAATTCTGATT
TATCGTCATTTAAAAACGACTCAATTTGTAGAGAAGAGTTCTCAACAAACTGCTTTTGTA
GTTTTTCGATACCTTTCGAGCTTAAATGTTCAGGAGAGATGTATTGAGATAGATAGGTGA
ACTCGGCTTCAGACAACTTAACCGAATCAGAAATCACACTAGTCATAGATTCTTTAGGTG
TGTTATCAGTTTTTGCGCCAGCAGCGCCCTTGAGCATTTTTTCAAAGTGCTTCACTTCAT
GAAATGATAAAATATTTCTCTCGTCCTTTGGAAATTCAAAATCTTCTAGGACATTAGATT
CAATCTGCGCCAAAGTGGATGTGTTGTTACGGACCCACGCTTCTTCTTCACCAGGTATGT
AACCTTCTTCGCCAACTTGTGGAATATGGTACCATCCTTGAATAGATAATCTGTGCTTAT
CAACTTTGACTTCTTCGACATCGTGGAAAGAGAAACCCGGTAAAACTTTGAAAAAAGCAA
TTTGATTGAACTGTGGAACTAGTTTAGCAGATGGATCGGAATGTGGAACGTTTGGTAAAA
TACTTGGAAAAAGTCTTAGACCACCACCATAATGCGATTTCCATTTTCTGTCGGGATCTG
GTAGGTATAAAATGAAACTAATCCTTCTAGAGCCAATAACGTCATCATGAGTCAACAAGT
GACATCCCTTTGTGTAAGTGTTGATGCTCATGTCGGTCTTAGAACCAGACAATTTACCAG
CTTTGGTGACGTAGCCAAAAAAATCTCTATATTGCTTGGAATACAGAATCTGGCGCAGTT
TGAACAAATTAGGCAAACGGGACAAGTCATCCCAGTCCAGACCAGACAAATTGGCCAAGT
CACCACTTTGGTTGACTCTATAGATATCGGTTTCTTTTTTAGTGAAATGGATCTCAGTTT
CTATTTCTTTACGAACAGCACGTAGTAGATCGTCATTAACCAATTCATGAATAGTACCCC
AGTTGTAAGGCTGAGAGTCTTCAATTTCCTTTTTCAAGCCATCCTGGAAAGTCTTGTCCC
AGATTTTAGGGTTGAACATACCCTTTATCTTGTCCTCTTCGAGGGAAATTTGTTTGGAAT
TTCTCTCCTTCTCACCTTTAACTTCAGCAGTTTTTCTCTTCATTATATTTCCGGTATATT
TGGTGATCTTAATTAAAAAATGTAAAAATAAAAAGAAAGAGTGCTAAAGAATGACACAAA
AAAACAGTTGGCTCTTCGTGTTGTAAACGGAAGAGAACGGCTTCCAAGTGATGACTTGAT
TAATATATAAGCGAATTTTTTTTTTTTTCACTTTTACCTAAGAAGTTTATCCGATGGAAT
GGTCCGAAAAAAGAAGATGCAACTATTACGCACATAAAGTAGGTGTAAGATCGCCCGATA
CAAACAATAAATAAGCAAATACTCATTTTATTGCATACTTCGGAAACTTTATGCCTGATG
TAAAAGAATCCAAGCAATTCATAGGATCTCTCATTGCATCAGCTTGTTATCATACCGTAA
AGACATCTCACCTCAGAGTGAGCTTATGTTTTAGTTATAGTGTTTTATATACAAGCTATA
AACTCTCCTCTTATAGTCCCATATGGGTTGAAGAAAAGAAAAGAAAAGAAAAATCTTCTA
CCAAAAAAGAAATGCTATTGATATTAAGGAAGTAAATTACATGATCTAATTGAAGTCCAA
CCATGCAAAGTACCGGTCGAAAATTAGGAATATCATCTAATAATATCTTTTCCAAATTAA
AGGCGGCCACCTCTCTATAAGATATAACCATACGAATTTCCTGACGTGAGAAGGAAAAAA
TTACTGGAAAGTTCTTTCTTACATGCAATGACCAGTTAGGCCACGTTTTAGTGTTTTCTT
CCTTGCAATGGTTCTACGACCAGCCTGTCAAATGTGTACATCTGAGAAATAACAGACTGT
CTTTTCAAGACACCTAAGTCGTTCTTAGCTTCCTTAAATAGGTTCATTAACACTTTTGGG
TCTTGCTGATTCATGTTATTTCTGAAAGTAGTCCTTGTTTTACTTAAAAAGTATTCCCTG
AAGTTGTAATTATTGAATTGATTAGCATTCTTGATGAATTCCTTGTATAAAGACAACACC
TGCCTTCTTGTTGGAGCTGTAAATCCAGGCATTTCTCTTCTTTCAAAAGGTGATTCCAAG
TTCCCTATACTGCAGATAAAAATGGGAATAAAACTGCTATCCAAACTTCACTTGTTACCT
TAGGCTCCGTAAAGTTACTGTGTAGTTATATCAATTCCTCAATCATTTTTCTCCGCTGCT
TATAAATGAATGAGAATAAATAGACTGCTATTACCCGGAAAGCGGGTGTTTCTCCAATAA
ATGCATTGTTTAATAATAAGTGGGTAATACAATATTGTTTGGATTTGATGGAAATAGCTA
TTGCTTTATCTACTTTACTGTGGACATTTGGGAACTAAAAAAACCTCTTTAACCAATATA
TTCAGCATATATTATGTAAAAATGAATAAAAAAGGTCCTACCCGGATTCGAACCGGGGTT
GTCCGGATCAAAACCGAAAGTGATAACCACTACACTATAGGACCAGTACAACTGTAAATT
TAGCGGTAAAACAATCAACTAACGCTACAGTAAACTAAACGTAGTACTTTGACACCGATA
AACAGGTGAAATATTGAAAAATCGGCAAATAAATACATAATTATTAGCACTTTACTGTTA
TTGAACATTATGATATCAGGTATACAAGATATTAGGTATACAAGGTACACAAGGTATACC
TGAGAAACTGGTGAATAATTCGATAATTGTTGGCATTCCATTGTTTGGTAGAGGCTATTA
TATCATGTATACAGAATATAGTAGAAGTTCTCCCCAAGAATATAGGAATCCTCAAAATGA
AATCGATATCTCTACATAGTAATACAACGATTATTCCTCATTCCGTTTCATATGTTTCAT
TATCCTATTAGATTACATTTCAACTTTCACTAGATTTTAATACTTATAACACATTTTTAA
GCGGCATGTGATAATATTCAGGTAACATTAATAATACTAAGCAGATGACATTGGAATTTC
GTTACAACAATACCTCTAATATTGCTTCTGCCGAAATCAAATTATGATAAGAACCAATCA
TCATCCATCGTCTAATATTGTAAACTAGTATACCATCATGAAGATTGGGTGAATTTTGAG
ATAATTGTTGGGATTCCATTGTGATTAAGGCTATAATATTAGGTATGTAGANNNNNNNNN
NNNNNNNNNNNNNNNNNNNNNNNNNNNNNNNNNNNNNNNNNNNNNNNNNNNNNNNNNNNN
NNNNNNNNNNNNNNNNNNNNNNNNNNNNNNNNNNNNNNNNNNNNNNNNNNNNNNNNNNNN
NNNNNNNNNNNNNNNNNNNNNNNNNNNNNNNNNNNNNNNNNNNNNNNNNNNNNNNNNNNN
NNNNNNNNNNNNNNNNNNNNNNNNNNNNNNNNNNNNNNNNNNNNNNNNNNNNNNNNNNNN
NNNNNNNNNNNNNNNNNNNNNNNNNNNNNNNNNNNNNNNNNNNNNNNNNNNNNNNNNNNN
NNNNNNNNNNNNNNNNNNNNNNNNNNNNNNNNNNNNNNNNNNNNNNNNNNNNNNNNNNNN
NNNNNNNNNNNNNNNNNNNNNNNNNNNNNNNNNNNNNNNNNNNNNNNNNNNNNNNNNNNN
NNNNNNNNNNNNNNNNNNNNNNNNNNNNNNNNNNNNNNNNNNNNNNNNNNNNNNNNNNNN
NNNNNNNNNNNNNNNNNNNNNNNNNNNNNNNNNNNNNNNNNNNNNNNNNNNNNNNNNNNN
NNNNNNNNNNNNNNNNNNNNNNNNNNNNNNNNNNNNNNNNNNNNNNNNNNNNNNNNNNNN
NNNNNNNNNNNNNNNNNNNNNNNNNNNNNNNNNNNNNNNNNNNNNNNNNNNNNNNNNNNN
NNNNNNNNNNNNNNNNNNNNNNNNNNNNNNNNNNNNNNNNNNNNNNNNNNNNNNNNNNNN
NNNNNNNNNNNNNNNNNNNNNNNNNNNNNNNNNNNNNNNNNNNNNNNNNNNNNNNNNNNN
NNNNNNNNNNNNNNNNNNNNNNNNNNNNNNNNNNNNNNNNNNNNNNNNNNNNNNNNNNNN
NNNNNNNNNNNNNNNNNNNNNNNNNNNNNNNNNNNNNNNNNNNNNNNNNNNNNNNNNNNN
NNNNNNNNNNNNNNNNNNNNNNNNNNNNNNNNNNNNNNNNNNNNNNNNNNNNNNNNNNNN
NNNNNNNNNNNNNNNNNNNNNNNNNNNNNNNNNNNNNNNNNNNNNNNNNNNNNNNNNNNN
NNNNNNNNNNNNNNNNNNNNNNNNNNNNNNNNNNNNNNNNNNNNNNNNNNNNNNNNNNNN
NNNNNNNNNNNNNNNNNNNNNNNNNNNNNNNNNNNNNNNNNNNNNNNNNNNNNNNNNNNN
NNNNNNNNNNNNNNNNNNNNNNNNNNNNNNNNNNNNNNNNNNNNNNNNNNNNNNNNNNNN
NNNNNNNNNNNNNNNNNNNNNNNNNNNNNNNNNNNNNNNNNNNNNNNNNNNNNNNNNNNN
NNNNNNNNNNNNNNNNNNNNNNNNNNNNNNNNNNNNNNNNNNNNNNNNNNNNNNNNNNNN
NNNNNNNNNNNNNNNNNNNNNNNNNNNNNNNNNNNNNNNNNNNNNNNNNNNNNNNNNNNN
NNNNNNNNNNNNNNNNNNNNNNNNNNNNNNNNNNNNNNNNNNNNNNNNNNNNNNNNNNNN
NNNNNNNNNNNNNNNNNNNNNNNNNNNNNNNNNNNNNNNNNNNNNNNNNNNNNNNNNNNN
NNNNNNNNNNNNNNNNNNNNNNNNNNNNNNNNNNNNNNNNNNNNNNNNNNNNNNNNNNNN
NNNNNNNNNNNNNNNNNNNNNNNNNNNNNNNNNNNNNNNNNNNNNNNNNNNNNNNNNNNN
NNNNNNNNNNNNNNNNNNNNNNNNNNNNNNNNNNNNNNNNNNNNNNNNNNNNNNNNNNNN
NNNNNNNNNNNNNNNNNNNNNNNNNNNNNNNNNNNNNNNNNNNNNNNNNNNNNNNNNNNN
NNNNNNNNNNNNNNNNNNNNNNNNNNNNNNNNNNNNNNNNNNNNNNNNNNNNNNNNNNNN
NNNNNNNNNNNNNNNNNNNNNNNNNNNNNNNNNNNNNNNNNNNNNNNNNNNNNNNNNNNN
NNNNNNNNNNNNNNNNNNNNNNNNNNNNNNNNNNNNNNNNNNNNNNNNNNNNNNNNNNNN
NNNNNNNNNNNNNNNNNNNNNNNNNNNNNNNNNNNNNNNNNNNNNNNNNNNNNNNNNNNN
NNNNNNNNNNNNNNNNNNNNNNNNNNNNNNNNNNNNNNNNNNNNNNNNNNNNNNNNNNNN
NNNNNNNNNNNNNNNNNNNNNNNNNNNNNNNNNNNNNNNNNNNNNNNNNNNNNNNNNNNN
NNNNNNNNNNNNNNNNNNNNNNNNNNNNNNNNNNNNNNNNNNNNNNNNNNNNNNNNNNNN
NNNNNNNNNNNNNNNNNNNNNNNNNNNNNNNNNNNNNNNNNNNNNNNNNNNNNNNNNNNN
NNNNNNNNNNNNNNNNNNNNNNNNNNNNNNNNNNNNNNNNNNNNNNNNNNNNNNNNNNNN
NNNNNNNNNNNNNNNNNNNNNNNNNNNNNNNNNNNNNNNNNNNNNNNNNNNNNNNNNNNN
NNNNNNNNNNNNNNNNNNNNNNNNNNNNNNNNNNNNNNNNNNNNNNNNNNNNNNNNNNNN
NNNNNNNNNNNNNNNNNNNNNNNNNNNNNNNNNNNNNNNNNNNNNNNNNNNNNNNNNNNN
NNNNNNNNNNNNNNNNNNNNNNNNNNNNNNNNNNNNNNNNNNNNNNNNNNNNNNNNNNNN
NNNNNNNNNNNNNNNNNNNNNNNNNNNNNNNNNNNNNNNNNNNNNNNNNNNNNNNNNNNN
NNNNNNNNNNNNNNNNNNNNNNNNNNNNNNNNNNNNNNNNNNNNNNNNNNNNNNNNNNNN
NNNNNNNNNNNNNNNNNNNNNNNNNNNNNNNNNNNNNNNNNNNNNNNNNNNNNNNNNNNN
NNNNNNNNNNNNNNNNNNNNNNNNNNNNNNNNNNNNNNNNNNNNNNNNNNNNNNNNNNNN
NNNNNNNNNNNNNNNNNNNNNNNNNNNNNNNNNNNNNNNNNNNNNNNNNNNNNNNNNNNN
NNNNNNNNNNNNNNNNNNNNNNNNNNNNNNNNNNNNNNNNNNNNNNNNNNNNNNNNNNNN
NNNNNNNNNNNNNNNNNNNNNNNNNNNNNNNNNNNNNNNNNNNNNNNNNNNNNNNNNNNN
NNNNNNNNNNNNNNNNNNNNNNNNNNNNNNNNNNNNNNNNNNNNNNNNNNNNNNNNNNNN
NNNNNNNNNNNNNNNNNNNNNNNNNNNNNNNNNNNNNNNNNNNNNNNNNNNNNNNNNNNN
NNNNNNNNNNNNNNNNNNNNNNNNNNNNNNNNNNNNNNNNNNNNNNNNNNNNNNNNNNNN
NNNNNNNNNNNNNNNNNNNNNNNNNNNNNNNNNNNNNNNNNNNNNNNNNNNNNNNNNNNN
NNNNNNNNNNNNNNNNNNNNNNNNNNNNNNNNNNNNNNNNNNNNNNNNNNNNNNNNNNNN
NNNNNNNNNNNNNNNNNNNNNNNNNNNNNNNNNNNNNNNNNNNNNNNNNNNNNNNNNNNN
NNNNNNNNNNNNNNNNNNNNNNNNNNNNNNNNNNNNNNNNNNNNNNNNNNNNNNNNNNNN
NNNNNNNNNNNNNNNNNNNNNNNNNNNNNNNNNNNNNNNNNNNNNNNNNNNNNNNNNNNN
NNNNNNNNNNNNNNNNNNNNNNNNNNNNNNNNNNNNNNNNNNNNNNNNNNNNNNNNNNNN
NNNNNNNNNNNNNNNNNNNNNNNNNNNNNNNNNNNNNNNNNNNNNNNNNNNNNNNNNNNN
NNNNNNNNNNNNNNNNNNNNNNNNNNNNNNNNNNNNNNNNNNNNNNNNNNNNNNNNNNNN
NNNNNNNNNNNNNNNNNNNNNNNNNNNNNNNNNNNNNNNNNNNNNNNNNNNNNNNNNNNN
NNNNNNNNNNNNNNNNNNNNNNNNNNNNNNNNNNNNNNNNNNNNNNNNNNNNNNNNNNNN
NNNNNNNNNNNNNNNNNNNNNNNNNNNNNNNNNNNNNNNNNNNNNNNNNNNNNNNNNNNN
NNNNNNNNNNNNNNNNNNNNNNNNNNNNNNNNNNNNNNNNNNNNNNNNNNNNNNNNNNNN
NNNNNNNNNNNNNNNNNNNNNNNNNNNNNNNNNNNNNNNNNNNNNNNNNNNNNNNNNNNN
NNNNNNNNNNNNNNNNNNNNNNNNNNNNNNNNNNNNNNNNNNNNNNNNNNNNNNNNNNNN
NNNNNNNNNNNNNNNNNNNNNNNNNNNNNNNNNNNNNNNNNNNNNNNNNNNNNNNNNNNN
NNNNNNNNNNNNNNNNNNNNNNNNNNNNNNNNNNNNNNNNNNNNNNNNNNNNNNNNNNNN
NNNNNNNNNNNNNNNNNNNNNNNNNNNNNNNNNNNNNNNNNNNNNNNNNNNNNNNNNNNN
NNNNNNNNNNNNNNNNNNNNNNNNNNNNNNNNNNNNNNNNNNNNNNNNNNNNNNNNNNNN
NNNNNNNNNNNNNNNNNNNNNNNNNNNNNNNNNNNNNNNNNNNNNNNNNNNNNNNNNNNN
NNNNNNNNNNNNNNNNNNNNNNNNNNNNNNNNNNNNNNNNNNNNNNNNNNNNNNNNNNNN
NNNNNNNNNNNNNNNNNNNNNNNNNNNNNNNNNNNNNNNNNNNNNNNNNNNNNNNNNNNN
NNNNNNNNNNNNNNNNNNNNNNNNNNNNNNNNNNNNNNNNNNNNNNNNNCTTCTAACACC
GTATATGATAATATACTAGTAACGTAAATACTAGTTAGTAGATGATAGTTGATTTTTATT
CCAACACATCATATACGGTATAAGAAGATAATATAAATTGAGAGACAGCCATCAAAAATT
GATGGAAACTGAAATGTAATCTAATAGGATAATGAAAGACAAAGTATAACGGGAAGGAAG
ATAAAGTAACACCATCGATTCTCTTTTGTGAATTCCTATAACGTCGGGAGAATTGCTTGT
ATACTATGTATACCTAATGTTATAGGATTCGGCAACAATGCAATCCGAACAATTATCAAA
TTATTCGTCAGTTTCTCAGGTATATATATTATCCTGAATGTTCTCTCCCAGGAGTATGGT
CCCTTAAAAGGCAAATCAATAATCTTAATATAATGTTTTAATTGTTTTTCTTTTTCTACG
TTTCTGAAAATTACGATTAATCCATTCTATTAAATTGTCAACTCTGCGTTATTCCTTCAC
CAAATTTGAATACGAATCAGACAATTCTAAAATTACGTCATATTTTAACAACACATATCA
TAATATTTCACCAAAAGTCGCTTTTGATTAATAAATGATACGGCATTTTTTTCCCAATGA
ACGGCCAGTAACATATCAGTAGATTCTAAACACATTTTGTATCAGTACACCTTCTTACAC
TGCTAAAATGTTTTGGTCTTTTTTTGTTTACATTAATATTTTCATTTACGCAACAGAGAA
TTGCCGCTAAATATTCACCAGCTACAAACAACTGGGTATGTATTAAATATAAGAATGCGA
ATTGATACCCTTATTACATAATTTTTTGATGCTCATCAGTATCAACAAATAGAATATAGC
AAACGGAATTACCGGACATTCTAACATTTCCTGGAGAATATCTGCTAGAGTCAAATCAAA
TGATGAAGACTTTCGGTTAGCGTTTCAGAAATAAACAATGATGATTAATCCAAAAAATTT
CGTATTTGAGAAGTAAGACAGTGAATCGAAGTGGTTCTCCTATGGATTGTTTTATTCTTC
AGTTGCAGACCCTGGGAACGTCACTGCGGTGTTTTCGCCCGTCATACCAAGATGGGGGCG
GAGAACGGAAAATTTGATGGCGAATGTACACTGCCAAGGACAAACAGGGACGATAAAGTG
TTAAAGTGGTGATACAGTCGGATCCGCGGTTAGCCGTAACCATTGCTTTCCAATGGTTTA
CGCCTGTAAAAAGAGCAACTTAGATAATTGTCGGCTTCACGTAATTAAGACGTATTAACT
CAAAGGAAAAGAAAAGAGGGAATATGGTAAAGGAGACGGAGTATTATGATATTTTGGGCA
TCAAGCCTGAGGCCACGCCCACTGAAATCAAAAAGGCCTATCGTAGAAAGGCTATGGAAA
CACATCCGGACAAGCATCCTGATGACCCAGATGCTCAAGCAAAGTTTCAAGCCGTAGGCG
AGGCCTACCAAGTCTTAAGTGATCCAGGGCTTCGTTCCAAGTATGACCAGTTTGGTAAGG
AGGATGCTGTTCCTCAGCAAGGATTTGAAGATGCTTCTGAATACTTTACAGCAATATTCG
GTGGTGATGGCTTCAAAGATTGGATTGGAGAATTTTCTTTGTTCAAAGAGCTAAACGAGG
CAACAGAAATGTTTGGAAAGGAAGATGAGGAGGGTACAGCAGCCACTGAAACCGAAAAAG
CAGATGAGAGCACTGATGGTGGAATGATTAAGCATGACACTAATAAAGCTGAATCTTTGA
AAAAAGATAAATTATCGAAGGAGCAAAGAGAGAAGCTAATGGAAATGGAGAAAAAAAGAC
GGGAAGATATGATGAAACAAGTCGACGAGTTGGCAGAAAAACTGAACGAAAAAATCTCTA
GGTACTTAATTGCTGTGAAGTCCAATAACTTGGAGGAATTTACGCGAAAACTAGATCAAG
AAATCGAGGATTTGAAATTAGAAAGTTTTGGTCTAGAGTTATTGTATTTATTGGCCAGGG
TTTACAAGACAAAAGCGAATAATTTTATCATGTCCAAGAAGACTTACGGAATTTCTAAAA
TATTCACTGGTACACGCGACAATGCTAGATCTGTTAAATCAGCATATAATTTATTGTCTA
CAGGCTTAGAAGCTCAAAAAGCCATGGAAAAAATGAGTGAAGTCAATACTGACGAACTGG
ACCAATATGAACGTGCCAAATTTGAGTCCACAATGGCTGGTAAGGCACTTGGTGTCATGT
GGGCTATGTCGAAATTTGAACTGGAAAGAAAACTAAAAGACGTTTGCAATAAGATTCTAA
ACGATAAAAAGGTTCCTTCCAAGGAACGTATTACAAAGGCAAAAGCAATGCTGTTTATTG
CCCACAAGTTTGCCAGTGCTAGAAGGTCACCAGAAGAAGCTGAAGAAGCTAGAGTTTTTG
AAGAGCTAATCCTAGGTGAGCAGGAGAAGGAACACAAAAAACATACTGTGGCCAGATAAG
CTCAGCAAGTTAATAACGCCTCATGTATATTTTTCATATATAGCGCAATCAATTACAAAG
CGAAGAAAAAAAAACCCTATGTATTCTAGACATATCACAGGCATACGGGATTTTCTCACA
CCAACCTTTCAAGTCTTGAGCACTTATGTTTTAACTTATTTTCTATTATTCAGTGTATAT
ATGGAATTAACACTGGCAACCCAAGCATCTTAGCCGAGATTCGCGGAGAAAATTGAAATC
AAGAATAATAAAAATTCTTGATTCACAGTCATAAGAGGCTGAAGCAACAGCAACCGGCTC
CCCAAGAACTACAATACGCGTCCGATATACTTTCTTATCAAATATATTGGTAATAATAAA
GGCTGCAGTTCTTTTTTTGATATAGTCTTTTTACGTTTATTGCAGCTAACAAACGCAATT
TTTCTTTCCCTTTCACTCGTCCGGTTTTACCAGGATTGATTATATCGCACTGTGACACTA
TGGAGTCACAAAGAAGCCATCATATTTTAACGAGATTAACCAAGATACGGAGAAGACCTC
AACAACCGTTAACCGACTTTACAGAACTTTACAGTAGAATTGCCAATGAGACAATATATT
ACTTGAACCTAGAAGAGAAAAAACGATATAAAGAAGCATTGCAAGGATGGAAAGCGCTTA
CCACTGATGTACTATTCAAACAGACATTGATAGAGCATAACTACCCAAATACTCAATCAT
ACACGAAAGATGAAGTTAGTTTACAGAACGGTATTCGAGAATTGTACCACAAGAGCGTTA
TGCATTTAGAAAGAGTCAAAAAATTGGTCCGAGAAGAGCCTGCTCCCAGGAATGATATGC
CGTCATCCAAAACATACACTAATCATAGCTCATCTTTCACAAGGTCTACTGAACCACCTC
CTGTATTCCAAATGGTTCCCGGAAGAATGATGAAAACATTAAGAAATAGAAATGCATGCG
GCTATAAAACCGCATACTCCAACCCCTCACTATCATCATATGGTAACAGCACATCGATAA
AACGCGGAGAAGATGCGGAGAACATTAGAGTAAATTTTGTACCTTCTAAGCCTTTATCCA
ACAATGCAAGCAGACAGCACAAGAACCCTATTGAGCACAATGATCCTGCACTTAAGAAGG
AAACTGAACTGTACTCAGATAAATATATCTCAGAGCCAATATTGATAGATTCGACTAATG
ACGAGGATGATCACGATGTCGGCATTTTAAAAGGACACAACGTTTTTGATGAAGAAGAAA
GTGATGGTTTCGAGTTTGATGTGTCCGATTACTATGATAATTTCTCCGAAGTCGACGTAG
AAGAAGAAGAAGAAGAAATAGAGGAAAGACGACGTATAAAAACGTTAGAAGCAATTCAAC
AGCAAATGTGTGACTTGTCTGTTACTTCTTCTACGTCCAGTAATAAGAGTGTAAGTTCTT
CAGAAAATGTTCCCGGATCATGCATACAGTCCCTGCCGACTACCGCCCCTGCTCTTCCTT
CATTACCTCCACCTCCTTTATTAAATGACGATAGAGCGTCCAGCACTGGCGCTCTAAAGC
CACATAGTTTAGAAACTTCTACTACTATGGATTCATCAAAGATTAGGAATCCTCAAATAT
CAAAATTAATGAAGAATAATCACGTACCATACTTAAAGGGTACCAAATCAACGCCCACTC
TTATCACTAAATCAACGCCAACATTTATTACAAGATCAAAAAGTAATACAAAACCAATCA
TCAAATCCAATGCATCGTCTCCGACCTCTTCTCTGACTGTTCCAAATTCAGTAATTCAAA
AACCCAAAACGGCTGCAATGGCTGCTAAGAGAGTTCTGAACAGCAAAAAGGTTGCGAGTA
ACCCCGCATTAAACACTACGAAGAAGAGTCACCCCATTTTGAAATCCAAAACGGCGAAAG
TCCCAAATTCCAGTTCGAAGAAAACGAGTATCCATCCTTCCAGACCTGTAAGTAACTCAA
AACCATACTCGCATGGTGCATCCCAGAATAAGAAGCCATCGAAAAATCAAACCACGTCTA
TGAGTAAAATGAATCGAAAAATACCAGCACAAAAAAAAATCGGTTCTCCAAAAATAGAAG
ATGTTGGAACAGAAGATGCCACTGAACATGCCACTTCCCTAAATGAGCAAAGAGAAGAGC
CTGAAATAGACAAGAAAGTCCTGAGGGAGATTTTAGAAGATGAAATTATTGATAGTTTAC
AAGGTGTAGATAGGCAAGCTGCAAAGCAAATTTTTGCCGAAATCGTAGTGCACGGAGATG
AAGTTCATTGGGATGATATTGCTGGTTTAGAAAGTGCAAAATATTCTTTGAAAGAAGCAG
TTGTCTATCCGTTTTTGAGACCAGACTTATTCAGGGGGTTACGTGAGCCAGTCAGGGGGA
TGCTCTTATTTGGACCACCAGGTACAGGTAAAACAATGCTAGCGAGAGCTGTAGCTACAG
AGTCGCACTCAACCTTTTTCTCTATTAGTGCTTCCAGTTTGACATCTAAATACTTGGGTG
AAAGTGAAAAATTAGTGAGGGCACTATTTGCAATTGCCAAAAAATTGTCACCTTCTATCA
TATTCGTTGATGAAATTGACTCTATCATGGGTAGTAGGAATAACGAAAATGAAAATGAGT
CAAGCCGAAGGATAAAGAATGAATTTCTTGTTCAGTGGTCATCCTTGTCCAGCGCAGCGG
CTGGTTCAAACAAAAGTAACACTAACAATTCTGACACCAATGGCGACGAAGATGATACAA
GGGTACTGGTACTTGCCGCGACAAACTTACCATGGTCTATTGATGAGGCTGCAAGGAGAA
GATTTGTGAGAAGACAATATATCCCATTACCAGAGGACCAGACCAGACACGTTCAATTTA
AGAAGCTTCTTTCCCATCAAAAGCACACGTTAACCGAATCAGATTTTGATGAACTGGTAA
AGATTACTGAGGGCTATTCAGGAAGTGATATAACGTCTTTAGCGAAGGATGCTGCCATGG
GTCCACTACGAGATCTGGGTGATAAGTTATTAGAAACAGAGAGGGAGATGATAAGACCCA
TAGGCCTTGTGGATTTTAAGAACAGTTTAGAGTATATTAAGCCCTCTGTATCCCAGGACG
GATTAGTGAAGTACGAAAAGTGGGCTTCACAATTTGGGTCATCAGGCTCATGATAATAAT
AATAATAATATAATAATAATGGTAATAATAAATAATATTCTAGCCTAGCTGGACAAACTG
AAAGCGGTGCACATAAGCGGATCGATAAAATATGTTCTGCATAATGTCACCTTTTTTTTT
TTTTTTTTTTTTACTACTTAGTTTGTTAAACAATTTAATATTAGCGTAAACTATTACTAA
TCTAATCCATGACTGGTCGTAGGTAGTCTTACCCAGACCCTTCTTCTCACCAAGCCATTT
TTCGATTTCCACCTAGAGTTATTGAAATTCCAGCTATAACACCATCCTTGATCGTCAATA
TCGTACTTTTCCTTGTAATCCATCAGTACGAACCATTTTGTCATCTGTGAACTGCTACTG
CCTGCAGTGCGTTCAGTACTCAGATCGATAGGATACAGTTCTATGAAGTTCGATACAGTA
TTTTTCGACAGGGCAATCAACGAGCCATTTTCAGTGTTTAGTCTTTGAAATTGTGGTGGG
TCAACGTGGGGCAGTAAAATCTTGGGAGAAAATAGTGGGTAACCAAGTAAAGTTATGCCT
CTCTCGTTTTCTATGAGTACGTCCTCCGGTAAAGCAGAGAAATCCTTCAAGAAATGGTTT
TTGCCCATATATCTCTATGTATGATTGTATGTTAACGATGAAAGAAACCTTGTTACGATT
GCAAAGTCTTCAATTTCCTGAAAAATAGTAGCCTTTTGGTCCCACGAGCCCAATTACGTA
GACAAGATTCAATCGCTTTGTTTAAGCGGAGATAAACTTTCACAAAAAAGATAATGCACA
CAAGCCAGATTTTCATTAAACACTGTAGAAGGTGAAAATGTCGCGTGACAGTATATGTAA
AGACATATAATAAGGTTTCAAAAGCAGAAAGCGCAAAATATCAAGGTGCAAATTATTGCT
TCCTTTGGTTCCATCAGCCTCTTTCTGTACGTAAAAAACAACATTTGCATGTACATGTTT
TCTAAGTTAATCTGCGACCCAACCCGAATAGCTCTCTTTTACCCTTATTTTCAACCGTCA
GCCCCTCTTATTGGTCGGAACGCCTCAATATCAGAGGTCAAAGTCAAGATATCTTGTTAT
CATCGGTGTTAGTGTCAAATTGCCAATTGAACGCCTCTATCAAACTGAGGAACAAACCAG
CGCTCGCAAAGGAAAACGCGTTTTCTTTTGGCTGCTTTTCTTTCGAAGTGCAGGAACGAG
CAGTATTTGGTTGCCATTGTGCGGCACACCCAAGCACACAACGATGCGCTAGGCCAATTG
ATTCATTACCGTTGGTGTTTCAGGTATTCGTGCTCATCAACGTGACTATTCAGCGACTGA
ATTAATCTGCCCTTAATAACTTATGTGCACCGTAAGCCAGTCAGTGCTAATGAGGGAATC
AATCAGGAGTCGTACAGTGCGTAGGCACACTTTTTTTCCGCAGCTATTTACTAAGGGTTG
TGTAACGTCTGGGTGTGAGGGGCAATTACCGTAAAGATGCTCTCGAAATTACAATACTAA
GGTACTTTTCCCCACGGAAAGTTGTATCTCGGAGTTAAAAAGGGAGTGGCACGAGATTCA
TACAATGGCGTGCAGGCAAAATGATTACTACCGAAATCGAAGCAAGATGATGTTCAACTT
TAGGACATCGAAGCTGTACCTCTGCATGAAGTAAGCAGAACAAGGCAAAGTTTAGTTTTT
CAATGCTCGCTTCTGCTGGCACTGTTAGTTTGCAGCACATGAGTAGCAGTGGCGCGATTA
TACCCCCGTTGGGCCATCAAAGCGCAGCTTTTTGTGGTATCAGATAAAATAGTGGTACGC
TAAGGTTCTGCGTGAGGAGTTAAGCAATATGCCAAGTATTACTTTGTAGACTTAATTTTA
AAATGCTCTTAATTTTAATTTCTATTTTTCTATTTTCTATTTTTCTTTTTTTCTTTTTTT
CTTTTTCTGGTTTTTTTTAGTAGTGATATATAATTAGTTTTTCATCTGAAAGATATTTAC
TGCACCATTTTCTTTTGTTCTTAGATGCAGATATTCTTTGACGATTTACCCTGGTGGTAC
AGAAGATTATGTTACATAATTCATCAATTTTTTTATGTTAATTCATCTTCTAAATCTGCT
TTAACTGGTTATTATTAAAATATAGTAAATCTAGATCTCTCAATCTGAGTGCTTACCGAC
TAAAAGCGCAGAAACTGTATTCTTATTATTTTTTTTTTTTCACGGCAGCTAATTGTACTG
AGTTATATTAATAGTACTGGAATAACACCAGGTAACGACTAAGGAACCAAATAAAGTATG
GACTATAAGCATAATTTTGCTACAAGTCCAGATTCTTTCCTAGATGGAAGGCAGAACCCA
CTCTTATATACAGATTTTCTATCTTCAAACAAGGAGCTTATATACAAACAACCATCGGGT
CCTGGTCCTGTGGATTCTGCTTACAATTTTCATCACCAAAACAGTTTGCATGACCGTAGC
GTGCAAGAAAACCTGGGTCCAATGTTTCAACCCTTTGGCGTCGACATCAGCCATCTTCCC
ATCACCAACCCTCCCATTTTTCAAAGTTCTTTACCAGCGTTTGATCAGCCCGTGTACAAA
AGACGCATATCTATCTCCAATGGTCAGATTAGCCAATTAGGCGAAGACTTAGAAACGGTT
GAAAATCTTTACAACTGTCAGCCTCCGATTCTATCGTCTAAGGCGCAACAGAATTCCAAT
CCTCAACAGGTGGCAAATCTAAGCGCAGCCACATACCCAAGCTTTAGCTCGAACGAATTG
CAAAACGTGCCACAACCACACGAACAAGCTACAGTCATACCCGAAGCTGCACCTCAAACA
GGTAGCAAGAATATCTACGCTGCAATGACCCCGTATGATAGCAATATAAAGCTTAACATA
CCCGCAGTAGCAGCCACTTGTGACATTCCTTCTGCCACGCCTTCTATCCCATCTGGCGAT
TCCACAATGAATCAGGCTTACATCAACATGCAACTCCGATTACAAGCTCAAATGCAAACT
AAGGCATGGAAAAACGCTCAATTGAATGTGCATCCATGTACTCCAGCTTCTAATTCTTCC
GTTTCCTCTTCTTCTTCCTGCCAAAACATTAATGATCATAATATCGAAAATCAATCCGTC
CATTCTTCAATTTCCCATGGCGTTAATCACCACACTGTTAATAATTCCTGCCAAAATGCC
AAGTTGAATATTTCAAGCAGCCTTCCATACGAATCGAAATGCCCTGATGTCAATTTAACA
CATGCCAACTCAAAACCACAATACAAGGATGCCACTTCTGCACTGAAAAACAATATTAAT
AGTGAGAAAGACGTACATACCGCGCCCTTCTCTTCTATGCACACTACAGCAACCTTCCAA
ATAAAGCAGGAAGCTAGACCCCAAAAAATAGAGAACAATACTGCAGGATTGAAAGACGGT
GCTAAAGCTTGGAAGCGTGCAAGGCTACTAGAACGAAACAGAATTGCCACTTCCAAGTGT
CGACAGAGAAAGAAAATGTCACAATTACAACTTCAAAGGGAATTTGACCAAATAAGCAAA
GAAAACACAATGATGAAGAAAAAAATTGAAAATTACGAAAAATTGGTTCAAAAAATGAAG
AAAATTTCGAGGTTGCACATGCAAGAATGCACAATTAATGGTGGTAATAATAGTTATCAA
AGCCTTGAAAACAAGGATCGTGATGTTAACGGGTTTCTGAAAATGATTGAAGAAATGATA
CGCAGCTCCAGTCTATATGATGAGTAAAACTATTGCGCATACTTCTTATGGGAGATCCAA
ATTCCCAGTACATTAGTTTGACTCTCCTTCCTTAATGTTTTCCTCTGTACGATTATTTAT
GTTTAAACGATTTATTTTACTATGTATGTATTTCCTTTCATTTTCTTTCGGAGTCATATA
TATCGCTGGGCGGCTAAATGTTTCCGACTTGTAAAAGAAAACATAACAAACATCTTGTAG
TTGTGAAACAGTTTCATTAAATAATCTTTTAGAAGAGTAAGGACATGAGTAGAGGCAAAC
TGGAAGATATGGAACAAAAGGAAACATCGGAAGTTGACTGGATAATCGTACGTGAAATTG
TCACATCCTTAACCTATTTTCTCTTTACTAACTTTTAGTAAGAGGTGTAATCTCCTCGAA
TATTATCTATGACAGTGTTTTGCTTTAATTCAATCCAGGAATCCTACGTTGTGGAAGAGG
GCACTTTCAAGAAAGAAAGGAGATGTCGAAGATGTAGGTGCTCTCAAGAGTGAAAAAAAT
TTAAAAATAAATCCTCGGGAAAACTCAAAACATATATACAAATGGGTTGCGCCTTTCGAA
AATGGATTTTTGAATAATAAATCACTGTTTGCTCATCTGGAACCTATATACAATTTCCTT
TGCCAGAATAAGTACAAAAGCTTCGAAGATGCAGTTGGTTTAAAGGAGCTGCAATCATTT
AGCAAAGATGTATCAACTGCTGATATAAACAACTGGTTTTTACCGAGATATAAAATTCTG
CTAAAAATCCTGAGCTTAAAAACAAAAGAAATTGACTTTAGAGGGTTATCGCAAGTGTTT
CAAACACTCCAAGTCTTGTTAGTTTCTCATTATTCGCATCGCATAGATTCTGATTCTTCT
TTTAAGAGGACACTGATAGACGTTCATGTTTTCAATTTCATCGCCAAGTTTCTGTTTAAT
AGAATTTTATTGAAGAAGAACCAAAACGATCCAAAATGGCTTCAAAACTTTTACGACCAG
GGAGATGGCAAACATTTATGTGATAAAGTTGACTACAAGCGCTTGTGTTCGTTGCATTTT
ACCCTTATTTACTCTATTATTAACATTCAACTCATCAAAATCAAGACAAACCAAACATTT
GTACCGCAGATATTAAAATACGTATCTGTTCTGAAATTAATTGAACACATACTTATCATC
ATCGAAAGTCTGATACATGTACTTATTAGATTTGTATCGAAGCATAAACTAATATGCATC
AACCGGAAAAAGGCGTACTGTCGAGTATACCTCGAAAGAGAATTGAGTTTGAAGAAAACC
TACTTAAAGAACTTTTACAGTGTAATAAGCGGTGTCCCAGAAAAAGAGTTAGGGGGTCTA
TTGAAAATACTCAAGATAGTTATTCTATCATTGCTCGAGACATTTGAAAGCATTGAATGG
CAGCACTTAAAACCTTTCCTGGAAAAATTTCCGGCTCATGAAATATCGCTTCAGAAGAAA
AGGAAATATATACAGGCGGCCTTATTAATTACTGCCGAAAGAAATTTGATAGCGCGCTTT
CGATTGTCAAGATGGTTCAATGAGACAGAAAACATTTAATTTTTCTTTTGCAGTAGGAGG
CGCATTATAAAACACAAAAATATCGAAAGCTCTTTCATTTCGGGGACAACAACTTCAGTT
GAAAATTACAGTGAACACAACATCTTCCCCAACAGACCTACATTAAAACGCTTCTTCCGG
ACTTGTCCATGATTAACCTAATCTTATACGAACTGAATTAAACTTTACGGTATTACCGAT
AGGAAACTTCTATTTTATGATTTTTTCGTTCGGGGACGGAACGAACAGGAAACAAAAAAA
AAAAGGTACGATCCATTGTATTCTCTACCCCCGTATATAAAACTAAGCTGAACAAGCCTG
TTGTTTTGCTTTACTATTGCTACTATTTTTGACGTAAACGCATTGACTAATTTCAGGTTT
TTATATTCTTGACACTAGCTAGACCATAGTATCGAAGGATTCAAATACACTAAAGTATCA
GATAATGTTCAGCCTACAAGACGTAATAACTACAACCAAGACCACCTTGGCAGCAATGCC
AAAAGGTTACTTACCAAAATGGTTACTTTTCATTTCCATTGTATCAGTCTTCAATTCTAT
CCAGACTTACGTTTCTGGTTTAGAATTGACACGTAAAGTCTACGAAAGAAAACCCACTGA
AACAACCCATTTGAGTGCAAGAACTTTCGGTACTTGGACCTTTATTTCCTGTGTTATCAG
ATTCTATGGGGCTATGTACTTGAATGAACCACACATTTTCGAATTGGTCTTCATGTCTTA
TATGGTTGCCCTATTCCACTTCGGCTCTGAATTATTGATCTTTAGAACTTGTAAGTTGGG
AAAGGGATTCATGGGTCCATTGGTTGTCTCAACCACCTCTTTGGTTTGGATGTACAAACA
AAGAGAATACTACACTGGTGTTGCTTGGTAATTCTGATGTAAGGGCAAGCATATCCTGTA
AAAAAAATTATATAGAGATGATTTATTTATATAATGCCTATAGCAACCTTTATCCAAACG
TTCCGTACATTATTTAACAGCAATTGTTTATCATTCATGATTATTTCTCAAAAAGCTGCC
AATTTCGCTTCATTTCTGTAAGTATCCCTACCTCTCTCCTCTAACGCAGATATTTCTGTG
CACGTGATCTCGTTGGCTTTTTTTTCGGCCGAAATTTTCACAGGCTAAGGCCGAAAAAGA
AAGAAAATTTTCAGAGGAAAAAGAAAATTAAACGACCTCGAAGCCGTATTTTAGATTTTC
CAATCTCTTATTTAGTAACGTGGTTTATTAACTCCATGATTCCATTCCTATTTGTTTTTC
TTTCTTTCTGAAAATCCTCTTCTCCTCGAAATAACCCAACTGACAAAAAGAACAATTCCC
AATGTCTGCTCCAGCTCAAAACTACAAAATCGCTGATATCTCTTTGGCTGCCTTCGGTAG
AAAGGAAATCGAATTGGCTGAACATGAAATGCCAGGTTTGATGGCCATCAGAAAGGCTTA
CGGTGACGTCCAACCTTTGAAAGGCGCCCGTATTGCTGGTTGTTTGCACATGACCATTCA
AACTGCTGTTTTAATTGAAACTTTAGTTGCTTTGGGTGCCGAAGTTACCTGGTCCTCTTG
TAACATCTATTCGACTCAAGATCATGCCGCCGCTGCTATTGCCGCTTCCGGTGTTCCAGT
TTTTGCCTGGAAGGGTGAAACTGAAGAAGAGTATTTGTGGTGTATTGAACAACAATTGTT
TGCCTTCAAGGACAACAAGAAATTGAACTTGATCTTAGATGATGGTGGTGATTTAACCAC
TTTAGTTCATGAAAAGCACCCTGAAATGTTGGAAGACTGCTTTGGTCTTTCCGAAGAAAC
TACCACCGGTGTTCACCACTTATACAGAATGGTCAAAGAAGGCAAGTTAAAGGTTCCTGC
CATTAACGTTAACGACTCCGTCACTAAGTCCAAGTTTGACAACTTGTACGGCTGTAGAGA
ATCCTTAGTCGACGGTATTAAGAGAGCCACTGATGTCATGTTGGCTGGTAAGGTTGCCGT
TGTTGCTGGTTACGGTGATGTCGGTAAGGGTTGTGCTGCTGCCTTAAGAGGAATGGGTGC
TCGTGTCTTGGTTACCGAAATTGACCCAATCAACGCTTTACAAGCTGCCATGGAAGGCTA
CCAAGTTGTTACCATGGAAGATGCATCCCACATTGGTCAAGTTTTCGTTACCACCACTGG
TTGTAGAGATATTATCAACGGTGAACATTTCATCAACATGCCAGAAGATGCCATTGTTTG
TAACATTGGCCATTTCGATATCGAAATTGATGTCGCCTGGTTAAAGGCTAACGCTAAAGA
ATGTATTAACATCAAACCACAAGTCGACCGTTACTTGTTGTCTTCTGGTAGACACGTCAT
CTTGTTGGCTAACGGTAGATTAGTTAACTTGGGTTGTGCTACTGGTCACTCATCTTTCGT
TATGTCTTGTTCCTTCTCTAACCAAGTCTTAGCTCAAATTGCTTTGTTCAAGTCTAACGA
TAAGTCTTTCAGAGAAAAGCACATTGAATTCCAAAAGACAGGCCCATTCGAAGTTGGTGT
CCACGTTTTGCCAAAGATCTTGGATGAAGCTGTCGCTAAGTTCCACTTGGGCAACTTGGG
TGTTAGATTGACTAAATTGAGTAAAGTCCAATCTGAATACTTGGGTATTCCAGAAGAAGG
TCCATTCAAGGCCGACCACTACAGATACTGATCAATTCAATTCCCATTTCAGTTCTTCTT
TCTCACTATTTTTTAATGTTCAAAAACTCAACGGTTTGATCATCAAAAAAGATCATAAAT
AAATTGCAAATATAAAAACAACAGCTAACAATCCTATCACAGTATTAATACTAATACATG
TGATACTAAGTTACGTTATCGAAAAGATAGATCCTGTATACCTATATATATAATAAATTC
TTCAACAGTAAATATTTCATTCATGCACTTGACTTTTTTTCATAAATAAGGGCACATACA
CTAAAAAAGCTACATTTCTCTCAGATAATGAGTAGGGCATGCATATCTCTGTGGATTCTT
ATCTAAATATAACTGGTGGTATTCTTCAGCATCGTAAAAGTTCTTGATTGGTTCAATAAC
TGTGGCAATCTTATTACCCCATTTTGGTTGCCATTCTTCCTTTATTTTGGCTAATTCTTT
TAAATCAGCATCTGAATGGGCGAACAATCCACTGCGATACTGTGTACCTTTATCAGGTCC
TTGTGAATTAGATGTAGTAGGATCATGGATTCTAAAAAAGAAATCAGTTAATTCTCTCAA
AGTTATCACTTTGGGATTATAGGATACTTGTAAAACCTCCGCAAAATCTGTGTCACCACC
ACAAACTCTCTTATAAGAGACACTAGAGGGGCTATCCTTTTTAGACTCTTCTCCATTAGC
GTAACCTACTTTACAATCCACTATACGGTCATTCAAATACTTCCTATACATATGTTCTGT
ACCCCAAAAACATCCACATGCTAATGTGATTAATTTATCCTTGGCTGGATCATACTTAAT
GGTTTTTGAAATAAGCGACGACATTGCAATTTGATTTACTTGTTAAGTTTTTGACGTTAG
AATATAACTGTCTTTCCAATTAAATCTATATATATATGATATTGAAAAATGTGTCTCTGT
CTACTCTTGTTTATATATGCCCTTCATTTTACTCATCGCAACTCCCTCGTTTTCGGCGCG
ATCAACTGTGGTGGCGGATTTTTTGACGCTGTGTCCGTTAACTCATTCAATAGTGCTACT
GCTATCACTGTCACAGGCTACAAACCGGTCGACTGTATCTTGTGCGTCTGTGAAAAGTTG
GTCAAGGACAGAGGAGTGTTCTCTTTCTAACCTTGGGGCAGTCAAGTTTGGAGGCAACAT
CTTAGTACCTTGAAGGCGAGCATTGATTGTGATGCTTGAGCGTGATTTTAAACCAGACTC
AGGCGGATTTTTCTCAGCATTAGTAGTTCTTGACTTTTTTATTGGTGATATTTCTATTAC
GTCCTTCCAAACGTCAACCTGTTCGTCCTGTGTAAGATCCCGAATTCTTTTACCGGGTGA
ACTATCTAAAACGCTTTGGCTGTTTGTAATCTCATCTACAAAAATCAACGAATCATCGTC
ATTATCGCTGTGTTCATCGACGGTGGTCAGTCTTGTGGGAGCCGGTATTTCTTCCAGACT
AGTGTCTTCGTCTGTATCTACAAAAAGCCTTTTTCTCACAGGTTCCAGGATTTCCTTTCT
CGATTCGCCTACCTTTCCGATACTTTTAATCGGCGAAGTATGCTTTCTTAAAAACTCATC
CAAGTTATTCTTCCGTGGTAGCCGAGACTTATTCGATTTTTTACCTTTCTTCTCTTTTTC
TTTCTGTATAAGTTGCTGTGTCTCATAATATTGAATTACTAATAGATGCGATTGAGGTAT
CAAGTATTTGGGTAACCAAAGACTATTTGGGTGTTCCATTATATCCATCTGACGTCGTGT
GGGACTCTTGCTTCTACTGGGAGAATTACTGCGCTTCAAAGGAGATTGAGAAGAAATGGG
TATATTAGGCAAGAATGTTGTATACCGTATTTTAAAACATGGTATTTGGAACTTTCCACC
ATCTATGTTCATAATTTTTTCTTCGGTAATCCTCATATTACCTTTACCTATATTATCGGA
CTCATCAATTGATAAAAATTCTCTTAATAGAAACATCTCGTGCATAGAATCATGAAACCA
CTTGTCGAAGCTAGAAATTTGAGGCAAATTCAAACTTTGTAAAAAATATTTCAGTTCATT
GAAATTTAAGTTTCTGTAGTGTCCGTTTCCAGCCATATTTATGTATTTATCACTGAGAAC
TTCTTCATCAAAATATGGTTGGACAATGGGGTGAAAATAGTGCATGATTGCGACAGTTGA
TGGCCAGCCTTCAAATGAACCTTGATTCAATAAAACAGGATAATTTCTTCCAAATAGCTC
GACAGAATGATCCTTGCAGTATAAATATAATCTTTTTTGAAACAATCTATACCGAGACTT
CCTCAGACTTTCTGATGTCAAATCTTCTAAATTGAAATCTTTGAAAATGTCATAAAATTC
CATGGAAAAGTTAGGATCTTCGCATTGAGCCAACTGCAAAGATTTGTTTTTACCCAAACC
CTTGACTCCACGATTGTAATCGGCACCTAATAGCACGCTGAAAAATAAGAGAGACAGGCG
ATCAAACTTCTTCCCTGCTACTTTATTAATTTTGGGTAGATCTATAACAGTAACAAAAGA
TTCTTTACTATCATGATGTCTACTGGGACTGTGGGAAGTTATTGAACTTGGGCCAAAATC
ATCGTAGAATTTCGAGTAATTTTTCAGGATTTTTTCTCCCCCAAATACGAGAGTATCTGA
ATCGTTACTTAAAATGAAATCTACAGCCCCAGAAACTTGCAGCCAAACACACTGGGCTTC
TCCCTCCCCACATGCGATTACATATGAAATGTTCATCAAGTCTAATAATTTCCGTACAAG
ACTGATGAACTCAGGGTCAGATGGCGCTAGCAATCCTTTACAATTGCCATAAACTTCATG
ATTCTTAACATGCTGTTCCCAGCTTGAATAGTACTCTTTCTCATCATCACAAGTAGTAGC
GTTCTGTTCGTGGTTAAATTTCCTTTTGAAAGAGGGTTTCATAACTCCGTCAAATACAAG
CAAGAATTCGACGTTTAAACTCAGTAGTTCTTTTAATCGAGATATGAAGTTTATCACAGC
TTTTCCTGTAGTTGTATAACTTCTGCTACCATAATATTCTTGACTACTGTCGATATCACT
ATCACGCGGAGAACGGGTAGGACTCCTTGATCTTGATCTAGATCTGGCGCTTATATCTAT
ATTTTGGATAAATCCACACTCAAATAGCCATCCATATGCGTCGATCGCGATTCTTGGAGC
TCTTTTTTGCGATTTATTAAAGTCTATGACAAACTTTCTCAACGGAATTCTGGAATCTTG
CAGATATGGCTTCAAAAATTCCCATATTTGTGAGACACCCATTTTCTTGTGCAGTATCCA
GAATATACAAGTAGGTAAAATGCAATAGAACTGTCATTTCATTGGATGGATCATATACAT
TATTGTTTATGTGTCAGTGAAAAGCTAGTTAAATCATTCAACTGTGGGCATTATAAGAAA
AAGAAAATGCCATTAAAAAAGGGCCGTTTAAAAAAAAAGAAAGAGATAGACAAAAGAAAC
AGGGGAGATAGAGAAAGAATACCAAATAATAATTAGAGTGATATTACAAATTCCTAATAA
TATATGTCTACACATAAAAGTAATACAAATAGAACAGCCAGTGTTCAATGCCAATATACT
ACCATTTCTTTTTTTACAAGTAATTTGATCTGAAAATAGCAAAACAAATAATACCAATGC
TCAGGATTGTGGTCAGAGGTAATGAAAATCTATCAATGCAACCGTTCAGTAATTATTAAC
ATAATAAGAATAATGATAATGATAATACGCGGTCATATACCAAATTTTAACCAATCCAAT
TCGTCAGCAATTGCTGAACTTTCTTTAGAAGATCCTTTTGTGGAATTATCCTCACTGATC
TTTCCGCCTGTACTCACATCTGCTTCATATTTTATAGGTGAAGTAGAGTCACTTGATAAT
CTATTGTTAAATTTGTGATTTGAGATAAACGAATTCGACTCCGAGTTCTGCAATTGTTGT
GATAACAATGAGGTATGTGATTTTCTTGAAGAAGGTCTTGAGACACTCGGTGAATCTATA
GGAGTATTAAAAATATCAAAATTTGGCTTTTGAGAGACAAAATTTGATGATCTTGAATTT
GTTGAAACGCTATTGCTTGAATTCCAATTCTGTCTATTCGAATTCGTGTTTGTGTTGGAA
TTCACGTCCACTTGTTGCTGTTCGTGCAGTTGTTGCAAAGACGCAGCCATAAACGATGAG
GAGTACGATGCATTGCGCGACATCTTTCTTCTTGGTATATTCATTCCTTGACGTTGGAAA
GAATTTGATAATAGATTCTGCTGTAGAGGACTATTTGAGTTAAAGTTTGCGGACGATATA
ATTCTTGGTGAGGATGCGACACTATTTCCTGCACTTACATTATTTGTTGTGTTCATTAGG
TTCATGTTCATGTTGAACTGCTGTGAATTAGCGCTATTAGGTGAAGGATTTGGTAATATC
GGAACAACAGATCTGGATGAAGATTTACTGGAACTTGAGGTGTTCGATGAAGTACTACTT
CGTCTTGAAGACCTTCTAAAATTAGGAGTAACAGTGTTCGAATTGTGACGCATTAAGTTA
TTAGAATTCAAATTTGCATTGCTTGCTCCATTAAAATTTGCGTTACTACTATTATACGAT
TGGCTGTTCATGAGGACCGGGGAGGGGACTGAGTTGAAGTTATAGCCTCCCCTATTTACA
TTAAGGATATTATTAGTATTACCGATGTTGTCACTAATGATTTCTTCAGGTATCACTCTA
GATAAAGAGTTTTGTTGTAGTGATTTTTTCCTCGATCGTATGGGTTTAGCATTTGTAGTG
GTTACTGAAGTTGAGGCAGTTGCAGGTGCACTTGGAGTATTTTTGTGCAATGTTTGGGTC
CGTTTGTTTGGCTCTCTTCTTTGAAATCCTCTTTTTGATAACGTCCGATTTTAAGGATAA
TGGCCTCATGGTACCATGTAATTTCTGGAAAAGACCGCAGGCATTGCAAAGAGTATTCCC
CTCTGGGCTTCTCCTCCAAAGCGGTGTCTTGAAAGTTTTACAATTGAAACATTGTATCAG
AGGTTTTTTATTTTGTCCTGATGGTTCCATATTGGATATACTGGAAGATACTGAGGCAGC
TCTTTTGAAATTGGCCAGGGACGTGGACGACATTGGCTTGATAAGTGAGTTTTTTCTTAC
AGAATTTGTTGTGTTGGATGAAGATAATCCTATCGAATCGCTCTTCTTCAGAAAAGGATG
CTGGATATTACTATTGTTGCTATTATTATTATTGGTAATGTTCATAGCGGATGAAGATGA
GTTGTTGTTTTGTAGTTTGTAGATGTTGAAGGAATGGTGGGACTGCGCATTAGTATTTGA
GTTGTTATTGATAGATGGCTGGTTGATGTTGCTGTTGGACGTGCTGGAATTATACGAGAA
CAGTGAGGATTTGGAGACGCTGTTGCCGAGGGAACCGTGGTTGTATTGCGGTATGTCGGA
AGTAAAGCTGTTAGGAGCACTAATAGTAGCTGAACCGCTCGAGTTGCTGGGCGTCATGTT
GAATTGGTCCACGTTAAAGTCCCAAAGTTGTGCAATTTCACCATTTTGTTGGTTGGATGC
GGCTATGTCGATGGGCTGAGTTGTGGCAAGTGAATCAAACATCGCAATATCATCATCCAT
ATGATTGGTAGCTGGTGTGGTGTCCTTGACCGTCTTAGTAGTCACGCTGGTCGTGGCAGC
TGCTGTAAAAGGAGACACGAAGTCCGTAAAATATAAATCATCGGGCAGTGCCTCCAGCAT
TGAGTCGAATGTGCCGCCGTTTAATCCACTGGCAAATGCTATATCCTCCTCGTTTTCACC
GGTGTTGCCACTACTCTGGCTCCTACTGTCACCAGTTTGTCTCGGCTCTTCATTACTTCG
ACCATGCACGTCCAGATGACTATTCAGCAGGTCGTACAGCTTCGAATTTTCGGGGTCGTC
TTGCATTTGTTTGTTGGTGGGGAAAAAGGGGGCCCTGTGCTCTCTCTCGTCTCTCTTTCT
TACACACTCTGTTATTGTGGGATGGGCTACTGCGCTGACATTAGCTTACCACTCTTGAAC
ATCTTTCTCTGTCTTGCAAGATGACTCTTTCCACTCTCTCAGCATTGCCATGTCACTTTC
TTTCGGGAACCTGTCCGCCGGGTAACAGAGCAAAAAATGTGAATATATCATATTAAGAAT
GTTTAAAGGGCCAGGTAGAGATAGAGTACAAGAATGGAAGGTTGAAAAGCTGTAAAGAGA
TCAAGAAGGTGTGGTAATTATGAGCAAGCATAAGCATGAATGGACGGAATCAGTGGCCAA
CTCTGGGCCGGCTTCAATCTTATCTTACTGCGCGTCCTCGATTTTGATGACAGTAACGAA
CAAATTCGTGGTTAACCTGGACAACTTTAACATGAACTTTGTGATGTTGTTTGTACAATC
ACTGGTGTGCACTGTGACGCTATGTATCCTACGAATTGTAGGCGTTGCTAATTTTCGATC
TTTGAACAGGACAGATGTAAAAAACTGGTTTCCAATTTCTTTGCTGCTCGTATTAATGAT
TTATACGTCGTCAAAGAGCTTACAATACCTTGCCGTGCCCATCTACACAATTTTCAAGAA
TCTGACGATCATTCTCATTGCCTATGGCGAGGTCCTCTTCTTTGGCGGAAAAGTCACTTC
TATGGAGTTGACGTCATTTATTATGATGGTCCTTTCATCTGTAGTGGCCACCTGGGGCGA
TCAGCAGGCCATTGCAATCAAAGCATCATCTTTGGAGAATCTCGATCAGGAACTTGTTGA
GTCAACCATCTTTGTGTTGAATCCGGGGTACCTCTGGATGTTCACCAATTGTATTTCGTC
TGCATTGTTCGTTTTGATTATGCGGAAGAGAATTCGGCTGACTAACTTTAAAGACTATGA
TACTATGTTTTATAACAACGTTCTGGCATTGCCTTTGCTGCTAGTCTTTTCCTTCATTAT
GGAAGATTGGTCCACAAAGAGTTTGTCTGTGAACTTGTCCGCCGACTCACTGGCAGCAAT
GGTCATCAGTGGGCTCATGTCCGTGGGGATATCGTACTGTTCCGGCTGGTGTGTTCGTGT
AACTTCCTCTACAACGTATTCTATGGTTGGTGCTTTGAACAAATTGCCCATAGCGTTGGC
GGGATTGGTGTTCTTTGACGCTCCAAAAAACTTTTTGTCCTTCTTTTCTATCTTTCTAGG
ATTTCTGTCTGGCCTGCTGTACGCTGTGGCTAAACAGAAAAAGATACAACAGCAAAAAGT
TCTAGCAGCTACTCTTGAGAAGTAGTACATTCTTCATTTGCTCAAGCAAAATATACATTT
ATATTCATTTATATGGGGTCTTCTTTGTATTTGTTTTAGGTTATTCCTTTTTTTATGTTA
CATATTATGTCAGCATCGTTTTATGAAATATATTCATATATAATTTTTCAAGTAAATAGC
AATAAAGTGATAAAATTTTGTTAGACGCACAAAAGGGCAGTGTCACAAATGGGAAGCGTG
AACTCATCACCGAATGAAGAGTTTGAAACTGTGCCAGATTCACAAATTTCAGGGTTTGAT
TCTCCTTTGATACCGACTAGTGTGGGAAGTTACTTTCGCGATGACGATGACGATGAGAAG
GTGCATCCCAACTTTATTAGTGATCCTGAGAACGACAGTTTGAATAGCGACGAAGAGTTT
TCTAGCCTAGAGAACAGCGATTTGAATCTTTCTGGTGCCAAGGCGGAGTCTGGAGACGAT
TTTGATCCAATCTTAAAAAGAACCATCATTTCCAAAAGAAAGGCACCAAGTAATAACGAG
GATGAGGAGATTGTCAAGACACCCAGAAAATTAGTCAATTACGTGCCTTTAAAAATTTTC
AATCTAGGTGATAGCTTCGACGATACGATCACTACTACAGTGGCCAAGCTACAAGACTTG
AAAAAAGAAATATTGGATTCACCTAGAAGCAACAAAAGCATAGTTATTACTAGTAACACT
GTAGCCAAAAGTGAGTTACAAAAAAGCATAAAGTTTTCTGGGTCTATCCCAGAAATTTAT
TTGGATGTGGTTACCAAGGAAACCATATCAGATAAATATAAAGATTGGCATTTCATCTCT
AAAAACTGCCATTACGAGCAATTGATGGATTTGGAAATGAAAGATACGGCGTATTCATTC
CTGTTTGGTAGTAGTAGATCGCAAGGAAAAGTTCCTGAATTTGTTCACTTGAAATGCCCA
AGCATCACGAATTTACTGGTCTTATTTGGCGTCAATCAAGAAAAGTGTAACTCGTTAAAA
ATCAACTACGAGAAAAAGGAAAATTCTAGATATGATAATTTATGCACAATTTTCCCCGTT
AACAAAATGCTCAAATTCCTAATGTATTTTTATAGTGATGATGATAATGATGATGTTAGA
GAATTCTTTCTGAAAGCCTTCATATGTTTAATCTTGGATAGAAAGGTTTTTAACGCTATG
GAATCGGACCATAGACTGTGTTTTAAGGTCCTGGAATTATTTAATGAGGCACATTTCATA
AATTCATATTTCGAAATTGTGGACAAGAACGACTTTTTTTTACATTATAGGCTACTACAA
ATCTTCCCTCATTTACAAAGCGCCTTGCTCAGGAGACGCTTTAGTGAAAAGCAAGGTCGG
ACTGAAACTATACAGCAAAATATAATCAAAGAGTTTAACGAATTTTTTGATTGTAAAAAC
TATAAAAATCTACTATATTTTATTTTAACGATGTATGGCTCGAAATTTATTCCTTTTGGT
CCCAAATGTCAAGTAACAGAATATTTCAAAGATTGTATTTTGGATATTTCTAATGAAACG
ACAAATGATGTTGAAATTTCTATCCTGAAGGGAATATTAAATTTGTTTTCTAAAATCAGA
TAACAGTCATGATGACTGAACATTGATCTGTTGATTTGACCAGTTGACTGCTTCCCCTTC
CTCTTCCAACTCTTCCATTTCCTTTATGGCAATAGAGGATGGACGGTAAACTTCAACGTC
CATTATCAATGGAATCTCAAGGATATCTTTCAATATGGAAAATTGTTGCTTATTTTTGTG
GTCCTTAGTAACAATATTTTCTGACTCATATTGGTAATCCTCTATCAAATGGATAACATG
GCCCATCCCCATGCTCAACGCGCTCCGCACATTGCTTTCGTTGTCATCAATAAACCAGGC
ATTTGCAAAGCTCGACAACCCACTTTGCAATTTAGCTGTTTCGAAGAATTTTGGATCTGG
TTTGCAAATAAATTCTTCCTCGATGGGTCTATCGTAGTGGCAATAGGTTATGCCGTCAAA
TAGATCAGCAATACCTAATATTTTAACACATCTGATGGCATGATTTTTGTACGAGTTTGT
AAACAGCCATAGTTTGTCAAATTTGCCGAGCTTCTTTTTCTTTAAATTGATCAGCAGCTC
CCTTAACTTCCAATCAGGCTTTAAATAGTCTTGCAAAGGTAAGGAATCATCGATGAATGT
ATTATATTGTAGGACGTCATCAATTTGTTTATTCTTTATTAAACCTTTCACGGATAATCC
ATATTCTTGATAATACGATTCGATTAGGCGTTCTGCCTCATCGTCGTCAAACCCCAATTC
GTATTTAAAGAAATTTGATAATGATTGTTGCATGAGCAATTGTACCTTCGTAGATTTTCT
GTACAAAGTGTTATCGATATCAAAGAAAAATACTTTTCGAGCAGGATCCGGATCCGGTAA
TTTGGGAGGATCCACCTCGAAATTGATTTGTGAGCCTAGATGTGTCAAGCTTTGCAAATG
CTCCTGATTTAGTCGTATCTGCTCTTTGATTTGGTTTCTATAAATTGTTCTGTAATCTTT
AGCGATAGTCATGATTACGTGCGTACAAAACTTATGTGTTTTTTATCTACACTAAATCTT
TTACCAACTATGCATTAAAACGAGTTCGTATATACATATATATATATATATATATATATA
TATATATATATATATATAAACACATACTTCTATACATGTACGAATGTATTACATATGCTA
AATGTATGTATATACATTATATGCACATCTCCTAATAATGAGCCATTTCAGTATTGCGGC
AAATACGGAAAACCCCGCAGAAACGATCGTACAGATCCAAGAACTTGGTTTGTATGTGAA
GCACGTTGCTGCCCCCTTTTTTTCTCAACCATCTCCGGCGGCGACCGCCGGCTTTTTTCT
TTCTTTTTCTGGAAAAAGAAAAACCCCCTATATCACCTTTGACGTTTACTCACTAAATAC
GGAACGTCTTACCCTAATCTCACTTTAAACGAATGAAAAAAGAAAGGTGAGGGGGGAGAC
CGATGGAAAAAAAAAATAAAAACTTTTTTCTTTTTTTTTTTTCTTCGTTCACCTCATCTC
AATTAATGGCTTTTCCTTGACGTAGTTCAGGTAACTGGGTAGTGATTCTCTTATAAAAAA
AAATATTATCATATTTAACATGTTAGTGCCCGTGTAGTTTTTTCTTCTTCTTTCTTAACT
TTTTTCTTGCAAAAATTGTTTTCTTACCCTTAGTACTACAAACAGTAACTTGACAGAACC
AAATATGCCACCAGTATCTGCGTCAAAGGCCAAGAGAGATGCTAAGAAAGCTGAAAGAGA
GGCTAAGAAAGCCGCTGCCGGTAAAACCATCAGAAAGCTAGGTAGAAAAAAGGAGGCTGC
TGCTGAAGAATCGGAGGTAGATGCAGCCGCTAGAGAAATCAAGATGATGAAGTTGCAACA
AGATAAGGATGGTCTTTCAGATCGTGTTGTCACTGGTGTTTTGAGTTCATTGGAGACTTC
CCGTGATATCAAGCTATCTTCTGTTTCTTTACTGTTCCACGGTAAAGTTTTGATCCAAGA
TTCTGGTTTAGAATTAAACTACGGCCGTAGATATGGTCTTCTGGGAGAAAATGGTTGTGG
TAAGTCAACATTCTTAAAGGCTCTTGCTACTAGAGAATATCCTATTCCTGAGCATATTGA
TATTTATTTATTGGACGAACCTGCGGAACCAAGTGAATTGTCGGCCTTGGACTACGTTGT
CACTGAAGCTCAACACGAATTGAAAAGAATAGAAGACTTAGTCGAAAAGACTATCTTGGA
AGATGGTCCTGAGTCCGAGTTATTAGAGCCTCTATATGAAAGAATGGACTCTTTGGATCC
AGACACCTTTGAATCTAGAGCTGCTATCATTTTGATCGGTCTAGGTTTCAACAAGAAGAC
CATTTTGAAGAAAACCAAAGATATGTCTGGTGGATGGAAAATGCGTGTTGCGTTGGCAAA
AGCTCTTTTCGTTAAGCCAACTCTATTATTGTTGGATGATCCTACTGCGCATCTGGATTT
GGAAGCTTGTGTTTGGTTAGAAGAATATTTGAAGAGATTTGACAGAACTTTAGTTTTGGT
GTCCCACTCTCAAGATTTCTTGAACGGTGTTTGTACCAATATGATTGACATGAGAGCTCA
AAAACTAACTGCTTACGGTGGTAACTACGATTCTTATCACAAGACAAGATCCGAATTGGA
AACCAATCAAATGAAACAATACAATAAACAACAAGAGGAAATCCAACATATTAAAAAATT
CATTGCATCTGCTGGTACTTATGCTAACTTGGTGAAACAAGCTAAATCTAGACAAAAAAT
TTTGGACAAGATGGAAGCAGATGGTTTAGTCCAACCTGTCGTCCCTGACAAAGTTTTCTC
ATTTAGATTCCCACAAGTGGAAAGACTGCCACCACCAGTTTTAGCATTCGATGATATTTC
ATTTCATTATGAGAGCAACCCATCCGAAAACTTGTACGAACATTTGAACTTTGGTGTCGA
TATGGACTCACGTATTGCCCTTGTCGGACCAAATGGTGTTGGTAAATCCACATTGTTGAA
GATTATGACCGGTGAATTGACCCCACAATCTGGCCGTGTTTCTAGACATACCCATGTCAA
GTTGGGTGTCTACTCGCAACATTCTCAAGATCAACTGGACTTGACAAAATCTGCTTTAGA
ATTTGTCCGTGACAAGTACTCTAACATCTCACAAGATTTCCAATTCTGGAGAGGCCAACT
AGGTCGTTACGGGCTAACCGGGGAAGGTCAAACCGTTCAAATGGCTACCTTGTCAGAAGG
TCAACGTTCTCGTGTCGTCTTTGCTTTATTAGCTTTAGAACAACCAAATGTCCTACTATT
AGATGAACCTACCAATGGTTTGGATATCCCAACCATCGACTCCTTGGCCGACGCCATCAA
CGAATTTAACGGTGGTGTCGTCGTCGTTTCGCATGATTTCAGATTATTAGACAAAATTGC
CCAAGATATTTTCGTTGTGGAAAACAAGACCGCTACCAGATGGGACGGATCCATTTTGCA
ATATAAGAACAAATTGGCCAAGAACGTTGTTTTGTAATTGTGAAGTTGATCTGCGCCGTG
CACGTTTTTACTTCCCCTTTTATGTATTTTAATAGCAATAATTTATATAACTAATCAATC
AATAAAGAAAGAAAATCACCGATAACAATGTGAAGGCAAGAAGATATAACAATGACTTCT
CCGTATGTGTAAGAATATGAGGGTAATTGCGTAAAAATGTATATAAATGCCATCTTTATG
AATAATCCGACCTAAATAAAACCCCCAAAAAAAAAATGAGAGCCCGCCCGCTCAAGTAGA
AATAAAAAAATTTACAATCACAGCTACTCAAACAAAACTAGGTTTGGGTAGCGCTGCCTC
ATGTGGGATATCTGTTGTGAACGAAGCACCGGCAAAGGCCGTATGACCAGCTACGTGCGG
TTTCGAATCGATCGACGCCGCCGCCCTATCCTGGTACTGTCTCGTTTTCTTCTTCTTGTA
TTTGCACGATTTTTTTTTAGGGGCCTTATCATGTAGGAAGGCATCTATGTTAACAGTGAC
CATCGTTGCCTTATCGTCCTCGTGTCCCGTCTTCGAGGTGCGTTCCCTAGGTTCTCGCCG
CTGTTTTGTAGACTTACCGAAGTTTGGTTTCTTGCCATTGGGCAAACTCTGCGTCGGTGG
AACTAATATTTGAGTTTTAGTGGGGCGCATGTGCTCCTTGGCGGAAGGAGGACTTTCCCT
TGTGACAATCTTGACTTTTGCAGAATGTTTTGTCTCGGAACCCATTATGAGAGATATTTA
ATTTTGACTATTATAAAAACGTTTGTGTTTGAGTTTCTGTTAGTGTATAACTTTGTATGT
AGTGACGTTATTGTCCGGTCTATCAGGAAGGTAATAGGGCACGGGAGGCCGTTGTTTTAT
AAGTACGGGCATAAGCCGCAAGAAAAAGAAACGTTAAGAACAAAGAAGAAAAAAAGGGGC
GCTGATAATCTTTTCACGCAGTAACTGTCGTACCGCGCGATTAGAGCAGTCCATCAAGGA
AATCCTGATCGGTCTCTAGTTCTTCCGGTAGATCGGTCGAAGGGGCACTGATCTTCTTGC
CCGCACGATCATGATCACCTTGTACGTGAATGGGAACGACTAATGATTCGGGCTCAGCCG
CTGTTATAGCCGATGTTGTATTCTGCCGTCCGAGCCAACGATTGAGCTCATCCGTACTCA
TCTGCTTGAGGTCTTTGATTTTCAAAGTATCTTTATTAGCAACATTATTGACCGCTGTGG
CGTCGTCGTTCTGCTGGAGCCGATTTTTGAGGACGTCTTTTAGCACCTTGTTCAACTCTG
CATTAGCGACTGCAGAATCCGGGTCCTCGAGTACCGGGTCCTCATAGTACCTGTCCTCGT
TTGACTTCAGGGCGGGCTGTTCTTGGTCTTGCTCTTTCTCCTCTGTGGTAGCTTTCTCTT
CTTTTTGGCGGTTCAATAGCCGGTACTTTCTATCACTGGGTGTGGCATGTTTTCTTTTCA
ATTTCTGTTTATCTTGAAATTTTTTTCGATTATCCTTCTTTAAGCTGAATGCATCCATTG
CGTTTTCAATTGTCTTGGTTTTTTTTTTGTTTTGCTCGTTTTAAGTAGAATAACGTTATT
AGTGGTAGCATGTGCTCATCTCCATGAGGTTTCTCCTAATCACTTCCTTTCTTCTCCTTC
ACCCATACACCCGCCAGCTTTCTTCAATCCGGGTATCGGTTAAATGCAGAGTGCCTAAAT
GGGCTGCAGATTGACCACTTTGGGTTTTAAGCTTTTCTCCTGATCGCTTTATCCGGACAT
ATTCTCTTAAACCGTTCTTCTACCCGTTTGGTAATACTTCATAAACACAATATGATATTG
CTGAGAACGCATTTACGACTGCAAATCTACTATTGAAAACAATTTTAAACATCTGGTCCA
ATCCAAGGTTTAATAACTATCATTACTTGAGGTGCAGCCGCTTTCTTGTACCTTAAATCT
TAGCTGGTTATTTTCCTTTTTTTTTTTTAGTTCCTTTAAGCCTATTTATTACCTTGCGTT
TTCGCACAAACCAACTGTTTTTGCCCAAAAGGATCTGCATCACAAGACGCACACGCATAA
CTGGAATATTTCATCATGCGGTCTTTCATAAAAGCCCATAAGAAGTCCACGTCGTTTGAT
GAAAGCCCCAAGCGACATAGCAACTTCAGTGGCAATATTAATAATAGTTCTCAAAGGTCA
AGTGATGACTCCTTAGACTTTCTACCATCTACACCATCACAAATGAATTACGATAGCATT
CCACCACCCGCGAAACACTCACCTGGATTTGAGTCTTTCCATCGTTTGGCTAACAAGACT
TCAAAGTTGTTCAAGAAAACTTCAAACTCAAACTTAAACTCGCATTTAGCTTCAACTCCA
ACCACAAGCACAAATCAGACTACTTCAAATTCATTTGTTCTCCAAAATCCACCCACAAAA
AATACTGGACCTCCGCCGCCATTACCACCGCCGCTCTTTCCTTCCTCTTCTACCTCTTCC
TTTTCACGTCATGACAATGAAAGTGAATATACTGCATATAAAAAAACTTCTCCTGCAAAA
GATTTTAATAGAACCACAGACTCTCTGCCTGCTATTAAGGGCACAATTACTCATTCGTGG
GGAGATTCCAAGGTCGAATCGCACGTAATAATATTAAACGATCCTGCTTCCCCAGCATCA
AACACATCTGAAGCGACTTCTTCTAAACAATTCAAAACCCCTATCATTGGCAATGAAAAT
CTAACTTCAACTGCATCACCATCTAACCTGGAACCTGCCATAAGAATATTGAACAAGAAC
AAGGGTAAACAGCAGGAAAATATCGACGATGCTGAGGACGGGTCATCTAAGAAGGAACAT
CATGTTTATAAAGCATTAGCGCTTGCCAAAAATAGAAACAGACAAGCAAGAATTCATTCT
CATGATGATATAATAAATTTGGGAAAGGCTTCTCAAATGGATATGAGTCTACTAGCCGCT
GCGTTTTCCGGAAATTCAACCACCACCATTAATAATGACCAATCTTCTAATGAACAAACC
GATGAGAAAATATTAGACATCGAAAGAGTGACCACTACTTCCACTTTAACCTCTTCCGAA
ACCACATCACCAATAAACAAGTCACCTTGTTTTTATAGTCAAACACTTTCCCTCTCACCA
AAGATACGACACAGCGACTTACAATCATCACCTTCAAAAGTGAACAAAAACGATAGTCAA
AACGAGACCTTGAACAAGAAAAAAGTAAGGATTAGTCTTAATAGAAAAGAAGAAAAAAAG
GTGTATTCCCTCAACAACAATTCCGATGAATACTCTGTCAATGAAAAAGAAACCCATAAA
GCCAACGATTGTAATGACGAATCTTCTGAAAACGGTGATGGCGATAATGATCATGATGAT
GATTATGATGACGATGATGATGACGATGATGATGATGATGAGTCGGAATTTTCGTTTGAA
TATGCCGGCATAAACGTAAGGACATCATCTGTAAAGTATTACTCCAAACCGGAACCGGCG
GCAAATGTATACATAGACGATCTATATGAGGATGAGAACTTTGATGACGATATGAATTGT
ATAGAAGATGATGAGAGTGGTAATGAGGGAAACGAAATATGCGGTTTATCGACTCGATTC
GAAGAAACATCCTTGAAAAGCAATAAAGTCAAAAAGTTCAATGATCTTTTTAACTTGAGC
GATGATGATGAGGAGGAGGATGGTAAAGATAACAGTAACAATGGAGATGAAAATGAGAGT
GATAATCTTTATCAAAAACGATTAGAAAACGGGAAAGAAACTTTTAATGGTAACCATGGC
GGACACCATGATGATGCATCTCTTGGAGAAACGGTTGACAACAAAGAGCAGTTTCTAATA
AACGATAATGTCAAGAAGCCTATTCAAAAATACAATGACCTTTTCGATTTGTCTGATGAG
GACGATAACGACGACAAAGAGATGTCAGAAGCTGAGTCTTATATGTTTTCCGATGAAGCT
CCTAGTATAGAAAGTGGACCAGCAAATGCAAAATCAACACGGGGGATCTATAGTCAATCT
AACAAAAATATCATACGTGATGGAAAGCCGAACTATAGTTTCTCTCTCAAAAGGAATAAT
TCGGATGATGAAACGGAGCACACTTCTGCAATAAAGGCTTCCCTTACAGGTACTACTGGC
TCTACCAAGCCTACAGTAAAGTCGTTTTCAGATATATTTAATGTTGATGATAGTGCAAGT
GACGCTGAAAGTGATTCTGGGACAGGAGGGAACAATTCTAACGGCTTAGTATCCAATGAT
TCAGAAAGGCAGGTCTCCCTGCAAAGTTCTTTGTATGAAACCAAATCAGAATCCCATCCT
CCCAATCATCCTCATTCGCAGATTCTTCAAACACCGGCTAAGATTGTAATAACTCCAAGC
GTTTCTGATGCGCAATCACAAGCCCTTGCAATCACCGATGATGATGGTGAAGATGATGAT
GATGACACTAGTAGCATACTAGGAACTCCGTTTCAACTTATTGATTCCTCTCATTCACAG
CAGCCGCACTATGCGAGCCCACAGTATACGGCTGTACTCAATAGCCCCCCTCTTCCGCCG
CCAGCTAGGTCTCAATCACTAAAATATCATGACTTAAATTGCGATTTAGATTCAGAAGTC
CCCAGACCAATGAGTAATCTCTTTTTCATTGATGAAGCTGAGGAAGACGAATACAATCAG
AAAAGTAAGTTTTTTGATTTCGACCACTACGACATCGATGAAATTAATGGCATCCCAGAG
GATTTTAACTTCTCTGATTCTGAAAGAGATGATCTTAATCGTCGTACACTGAAATCTCCT
TTACGGGGCGGCTCCAAGAATAGAGAAGTCTCTCCTTTTTCATCTGTGTCATCGTCTTTC
AGAAGTACGCATAGTTTTAATGGGAAATTAACGATCAACCAAGGGGCTAAAGAATTAGCT
CCGATGAAAAATAAGATTGAACTTACAAACAAGACTGTCACCTTCTTTAACAGTAATAAT
TGGAATACTTATGACTGCAATTCACTCTCCCGAAAAACTTCATCCCAAATGAGAGATAGT
AAATATCAAAATCATAATGTTGGTCAAAACGTAGAACCTTCAAGTGTTCGTTCGCCACAA
CATCAAATATCGAATGGTTTAGATGGAAAATGCAATGATAACTACGTAATCTCACCAAAT
TTACCGACAACTATCACACCAACTAATTCATTTACTAAACCCACACCGGAGTTCTCAAAT
GACTACTCATTAAGCCCTATTCAGGAGACACCATCTTCTGTTCAAAGCTCGCCAAAGAGA
GCGTGAGAAAATACTGCATGTTTTTTATGCCCGTAGCCTCCACATTTCTTCCCTAGTAGG
TGACTAGCTTTAAAACCTTTGCGTAATGTTCGTATTTGTAATCAATTGCATGTGCCAAGG
ATGATCTTTGGTAGATATAAAAGTACATATTATTAATTTGTTTTACAGAATTGGCATGTC
TGAATATAGTTTTTTTAAGAAAGTACAAAAACTAGAAGTTTTTCTTACATGTAAGAGATA
TGAAATTTTGTAATGTCCGATGAAAAAATAAAATAGGCAATAAGCAAATTGCCATTCCGA
TAAATCTTCATGCGATGAGCTGGTCAAATCTGTTTACCAGAACAATTTGTAGGGTTGTTT
TTTTTTTTTTTATTTTAGTTTGCGATGAGATGGAATGTCGTTATGAATACTGGACTGATA
CTTGTTCGGGATCAAACAATTCCCTTTTTCATCATACAGTGGAAAAGGCAACGGCGGAAG
TACTCTTGATTTTTTTGGCTTTGTTTGTTGTCCTTTTTCTGAGAATTTATGCTTCTCATT
TACCAGTTGATAAATAATTCTTTTTGCATCATCTGCAGTTTTATCACACATGCCCAAAAT
TTCGTTGCAATGGCTTAGACGTTTCTTCTGTTGCTCATTTTTAGCTTTTTGAGCATGGCA
GACTCTTGTTCGTGATATATCGTTATTTTTGAGGCCTACATCTTCATCCTGATCTAAAAG
AATAACCTCAACCATTTTACCATCTCTTTTTTCGTAAATGGTATTAAATTCCAAATCGTG
TCTATTTGAAGGAGTATTCTTATTCCTGGGGAACGAATAGTTGTTCTTCTGGGATGGAGG
ACCATGACCTAAATTTTTAATTGATCGTTTTTCTTCTATAAAGTTATGTTCTAAAGTTGA
CCTGTTAATGGTCACAGAAGGTTGAGATGTTGTATCCGTAATGGCAGTATTGGAAGAAAA
CTCAGAATTGTAGGAAGATTTACTACTACCCGATTGTGACGATTGGCTATTGGAAGATAA
AACGCTAAATGGAATTGAATGCGGATTCACACAGTTTCTTTGTTTACCAATTAAGTCTGT
AGGAGTTTGGTTCAAAGGAGTTGGTTCCTTGTTTTGAATTTCTTGACCAAATGAATTGAA
TGAAGATAGCGGTTTGAATGGCTCTATCGATGGAACACTTTTTGTTTCACTAATTATTGC
AATAGAATGGTCAGCAACTTCAGTAGAAAAAGCTTCGTTTTCATCCTCTGGGCATTCAAT
AAGTGATGGTGATGGTTCTCTTGTATGAGAGATACTTTCATCTGGTATAATTTGAATCGA
AGGTACCGAGATTTCTTGGAGGAAGGACCCATTTTTAGGTGATTGAGCTTCAGGAGGAAT
ATCAGATGTTTTTGGAGATGACGTGAACCGTAAGGGTGATCTCTTAGGTATTTCAATGGA
AGTACATGGGTTAGAATGTTCAACAGGAATTGACGGAGCAGAGGTCGGAGCTGGTGGTGT
GGAGGTTGCCTCGAAATTTAAGGAAATGTCATCAATATTATGAACGCTCCTGCTTCTCCT
ATGTTTATGTATCCTCGGATTATTATTCGTCGGAGATTTTTGCAAGTCTATTAACATCTG
TCTTCTGGATTCAAATGATTGATTCACAGGCGAAGTATCAACTTTCAGGAAATCTTCATT
GTTCGTGTCTCCAGAGTTTCTATTTTCATGTACCTTATCCACATTATTGTTAGTAGTACT
GGAGGGAAATTTGAATGACATATCGAGTTTGTCCAGTGATTCAGGGTTAACTTGGCGAGT
TGGAGAAGTTGGCTCCTCGCTAGGTTCAAACTGCTGGAAAAATTTTAATGTCCCATTTAA
ACCTGTGCTTGGTGGGGATTTCAT
>scaffold22|size618977
ATTATGTAGAGCTATCGATTCGCCTTTTGTAGATTCCTATTTTTTCTCGAGGAGAATTGC
AGCATATTCGTTCTACGTAATATTGCAGCCTTTAACAACAATGGAATCCAACAACTGTCT
CAAATTGTTCACCCATTCCCAATATACCAGTAACATACGCACTGATTAATAGAAGCCAAT
TAATTTCTATTCCAACAAATTTACTGAAGATTCCTTTGGATTCCAAACAATTTCGTAATT
GCTCAAACAATTCATTAAATATTTACACAAAAGTACAAAATAAGGATACGGTTCTTGTTG
TATCTCAAAATGAGATACGTCAGTATGACAATACGTCATCCTAAACGTTCATAAAACACA
TATGAAACAACCTTATAACAAAACGAACAACATGAGATAAAACCCGGCCTTCCCTAGCTG
AACTACCCAAAAGTATAAATGCCTGAACAATTAGTTTAGATCCGAGATTCCGCGCTTCCA
CCACTTAGTATGATTCATATTTTATATAATATATAAGATAAGTAACATTCCGTGAATTAA
TCTGATAAACTGTTTTGACAACTGGTTACTTCCCTAAGACTGTTTATATTAGGATTGTCA
AGACACTCCGGTATTACTCGAGCCCGTAATACAACAGTTCTCCGTTGAAAAGTCGCCATC
TTAGTATAGTGGTTAGTACACATCGTTGTGGCCGATGAAACCCTGGTTCGATTCTAGGAG
ATGGCATTTTCTTTTTTACCTGTCTTATTTTAGACAGGTTGACGTGATTGACTAAATGAT
TTGGCCAACTTGTTTATAAAAGGGTTCAAAGCCAAAGGAAGACGTGACCATTCTTAACAG
TGCAACGAAAGACAGCCTCAATATAGAGTTAGACAAAATAATAATATAGTAATTTAACAT
AGTTTAATATAAAAATAAGTAAAAAAATAATAATACTAATAATAATAGTAATGATAATAG
TAATAAAAGAAAATAAAGAAAAATTGCATTTCGTTAATAATAATAGTGTAGACTTATCAT
TTTTCCACTAATTCAAATCCTTCACATCTTATTATTATCTCCTTTTTTTTATATTTTTTT
TATGTTTCTTATGCTTTTTCGCGGTTTGTTGCACTAAAGGGAATTATTTGTGTATATGAC
GAGTGATGATTGCATCTTCCTTTGTTTTCTTGATGTTTCTTTCGTATTCTTCGCTTAAAG
AATTGACTAAAAGTTTTCTACGTTTATGTTTCTTGTATTTTTCTTCTACTACTCTTCTTG
TTAATAAGTATTTTCCTTTTTAAACTTTGATTTAGGACGTGAATCTATTTATTTTTTCTT
TCTACCCCCAGCTTGCCTNNNNNNNNNNNNNNNNNNNNNNNNNNNNNNNNNNNNNNNNNN
NNNNGTGAATCTATTTATTTTTTCTTTCTACCCCCAGCTTGCCTTGGTAGACTTTTTTGG
GCTGGCTTTAAAATTTGAAAAGAACATAATAAACTTTCATCAACACTCATCATTGCACCA
GCGTTATCGAATTCACCACAATAATTCGGAGCACTGAAAAGTGTCACCAATTGTCTTTTA
CTAAAGAATTCATAACCATCTTCCACAACTTGGTGGGCCCTGCAAATCAACTCCATATCT
TGTTTCTGTAAAAATCTGTTCACTACATCAGGACCAAAAGTGAAAGAAACACCTCTATCA
TTTTCACTCCAACCTACGATATCTTTATCTGGATCTGACCACAACAAGTCACATAATAAG
CCAACGTCGGGAATATCTGTTGGCCTCATCACCCTTCTGATCTGTTCCATACTATTCAAA
TCTGGTGAGAGACCACCATGCATACAGAAGATTTTCTCATCAATAATTGCAGCAATTGGT
AAACAATTGAAACAATCCGTGAAAGTTTTCCAAAGTTTGATATTATAACGTCTCTTACAT
TCATCATAAAACCCGTAAATTCTATTAATGGAAGCACATTCATGGTTCCCTCTTAAAATG
AAAAAGTTTTCTGGATACTTAATTTTGTAAGCCAGTAATAGACAAATAGTCTCTAAGGAT
TGTTTACCACGGTCGACATAATCACCCAAAAATAGATAATTAGATTCTGGCGGGAATCCA
CCGTACTCAAATAGACGTAGTAAATCATAGTATTGCCCATGAATGTCACCACATATCTAA
AAAAAAAAAAAAATTAAAAAAAATAAGTTAGTAAATGAATTTGTCACTAAATCTAGCTCA
TTCCGTTGACTTTAAGAGAACAATTACTGCTGTCAAAAACGCTTCATTTCTCCCAATGCC
TTCTGCAAATCCACATTTCTTGGTTTTCGTCCGACCTTTCTCTCGGGCTCAAAAAAAAAA
AAAAAGATTCGTTTTCTTCATAACGAAAAAATGCCTTCTTTTTTTAGTGTGAGCAAGGGG
GATTTTTCTGAATATGGGAGGCGCCGGCCGGATGATGATACAAAACATAAGGAAATCTTG
GTAAAAAAATGCCTAATAAGATAGAAAAATGAAGAGCTAAACACACACATTATCTCGGCT
ATCTCGACATATGAGTAGGCTAACATCAGATGCTTGGTAAATTCTTTCAGTCAAACGGAA
ACAACTGCTGTAACTATCTTACTGCCGCAACAGGAGTAGAACACATAAAACACCTGAAGC
TCTAGGCATTCTATCTCTTGATTGCGAAGTTCAACATTAACATACTTTAATTGGGGCTTC
TAACTCTAGTAAAATGGGTTGCTTTATGAATATAGATCTGGCTTTCGAACATAAGTATCT
GATTTCATTTTCTTCTAGATCAACTTGTTGACCAGGTTTAGATCCTCTTACTTCCAATAA
TCTATCGATGATATTATCAACGTCAACTGGTTGTGAGTCCATTTCTTTAATTTGAATGTA
TATTGTGGTAATCTGCTTTCCTCTCCCCAGTTACTCGTTCGTTCACCTCTTATTTTTTTT
TTCAGTTGTGGTGTTAACTTGTGTTACGTTGTTTTTTTCTTCTTCTTTTCTACTTTTGAT
TTTTTTTTCCTCTCTTGTTCCTTGAAACGAACGCTAAAAGAAAAAACAGCAAGAGCAAGA
AAAAAAATGGGGGAAGAGCGAATAAGCAATGATTGTTATCTACATAAGGGGTAATTTGGC
TAGTTTCTAACTGTCATCCCCATGCAGCCTGTCAAAGACTGATATATGCAGTCAAGAAAT
AAAAAACAAATTGCAATAAGCTCTCCACTATAGATGGCACAAAAACAGGTTAATAACAAG
TACTTATTACATTCCTCAACGAGATGAGCCAACAAGCAACCAATAGTGCACCTACTTGTC
TAACTTTAATTGAGGTTGTGCTCACAAGAAATGTTTTGCCAGGTATCTACCTCAATTGAA
TAACAACCGCAAAAGCTTTAGTACTAAATTGTCTCTCACCTTGTCTTCAAGAAAAGGGGA
AGGTAAATGAGAGAGAAGTCTTGCAATTTTTCTCAACCTTTCAACTCGAATGGAAATCAG
GTTGTAAGGGAAGCAATGAAATGTCAGCAAACAGCCACTAACTGTAATTCTTTGAAAAGA
TAATGTATGATTATGCTTTCACTCATATTTATACAGAAACTTGATGTTTTCTTTCGAGTA
TATACAAGGTGATTACATGTACGTTTGAAGTACAACTCTAGATTTTGTAGTGCCCTCTTG
GGCTAGCGGTAAAGGTGCGCATTTTTTCACACCCTACAATGTTCTGTTCAAAAGATTTTG
GTCAAACGCTGTAGAAGTGAAAGTTGGTGCGCATGTTTCGGCGTTCGAAACTTCTCCGCA
GTGAAAGATAAATAATCTACTATGATGAATGACATTAGCGTGAACAATCTCTGATACAAA
ATCGAAAGATTTTAGGATTAGAAAAACTTATGTTGCCTTCCTTCTGAAATTTATTTTTTG
TCATTATTGTTATGTAAAATGCCACCTCTGACAGTATGGAACGCAAACTTCTGTCTAGTG
GATAACAGAATTTTTCTATGGCCAATTTATTCTTTTTTTTTTCCCTTTTCTTAATGTGCG
TATCATTGCCGGGTTTGAAATTTCGAAATTAACTACTAAAAATTACCGCTTTAATGTATG
GAATATGTGTATCTTGCTAATTTTGCGTTGCCCTCGCGGTATCCCTATACGCCCACAGTG
CAAACACAGTAGAGCTTTGTGATAATACTCGCAAGGAATACAGTACATCAAAAACTTATT
ACACAGGCTTTCCAGTGCACTCACACCCACTTTACTGTTTTTTCTGCTTTTTTTCTGCTT
TTTTTTCTTTTTCTTTTTTCATCTTACTTACTTGAGCCTAGATAATAGAAGATAGTAAGT
TTGGCAGAGCCCAGTCACAAATACAGATTAACCTCTAACAAAGTCCACATCGACACCGTT
TCCAACTTGATATCATCAACTTTGGATATTGTATTAAAGTTACCAGTATCACTTTTAACA
AATTTTTTTTTTTTTTGGCTATGCTCATCGTTGCCTGAGTATTCTTTAGTCATTTCCAGT
TTCTTCAATAACAAAAAACATTAGTACGCGTTTCTATAATTAGGTGAAAGCATAAAGTTT
TAAAAAATGACCGTATTACAACCACCATCTAGTGTTTGTTATCCGCTCAACCTCCCTATT
GTACCGAATCCCAATCTGGATGAAGCAACAAGGAAGAAGCTCACTTTGGAATGCAGAACT
[truncated: 193,151 more chars]
